# Supplementary material for: The Gut Microbiome Signatures Discriminate Healthy From Pulmonary Tuberculosis Patients
Source: Front Cell Infect Microbiol. 2019 Apr 3;9:90. doi: 10.3389/fcimb.2019.00090 (PMC6456665; doi:10.3389/fcimb.2019.00090)
Supplement: Supplementary file 2 [file Data_Sheet_1.xlsx]

## Sheet: Table Legends
	Table S1	Sample information and sequencing statistics
	Table S2	Relative abundance profile at the phylum level of 61 samples
	Table S3	Relative abundance profile at the genus level of 61 samples
	Table S4	Relative abundance profile at the species level of 61 samples
	Table S5	Differentially abundant species between control and patient groups
	Table S6	Relative abundance of 110 differentially abundant pathways between controls and patients
	Table S7	Relative abundance profile at the species level of 46 samples used in Random Forest Model for classification
	Table S8	SNP information for species with sufficient supporting reads and present in at least 20% samples of each group
	Table S9	Detailed information of the Bacteroides vulgatus SNPs across groups. Only SNPs with significantly differed distribution are shown (P<0.01).

## Sheet: Table S1
Table S1 Sample information and sequencing statistics
Sample ID	Sex	Age	Group	Reference	Base Number				Read Number				Avg read length
					Raw Bases	Trimmed Bases	Trimmed human-screened Bases	Clean Ratio (%)	Raw Reads	Trimmed Reads	Trimmed human-screened Reads	Clean Ratio (%)
H01	F	25	Health	This study	8328220200	7013260609	7009032283	0.8416	55521468	52430774	52398481	0.943752	134
H02	F	26	Health	This study	8344883400	6851073321	6760236987	0.810106	55632556	51921225	51227475	0.920818	132
H03	F	26	Health	This study	6353592000	5180869222	5176484990	0.814734	42357280	39332375	39299284	0.927805	132
H04	M	24	Health	This study	5800313700	4810623443	4779669834	0.824036	38668758	36132279	35894155	0.928247	133
H05	F	25	Health	This study	5059933200	4226075353	3628319429	0.717069	33732888	31647351	27113679	0.803776	134
H06	M	41	Health	This study	7133401200	5982636656	5969439848	0.836829	47556008	44577257	44476862	0.935252	134
H07	M	28	Health	This study	5829935700	4868448016	4833993495	0.829168	38866238	36331401	36069470	0.928041	134			Note: Samples in grey were used for Random Forest testing group
H08	M	25	Health	This study	10782458700	8993473944	8992401298	0.833984	71883058	67213493	67205052	0.934922	134
H09	F	27	Health	This study	6796540200	5637606229	5636912710	0.82938	45310268	42333097	42327569	0.934172	133
H10	M	27	Health	This study	7040453100	5911071753	5909311345	0.839337	46936354	43979349	43965672	0.936708	134
H11	F	27	Health	This study	7356120000	5961828517	5955763576	0.809634	49040800	45334626	45287960	0.923475	132
H12	F	25	Health	This study	6159458700	5119490352	5033811100	0.817249	41063058	38294160	37646317	0.916793	134
H13	M	29	Health	This study	6330028200	5205456213	5202956948	0.821948	42200188	39247214	39225643	0.929513	133
H14	M	24	Health	This study	5940187500	4953544836	4949942423	0.833297	39601250	37030998	37003625	0.934405	134
H15	M	25	Health	This study	8277815700	7011178859	7009645144	0.846799	55185438	52035242	52023500	0.942703	135
H16	M	40	Health	This study	7114446300	5817712335	5817090753	0.817645	47429642	44205471	44200107	0.931909	132
H17	M	24	Health	This study	7104778200	5752124790	5750116649	0.809331	47365188	43713337	43697534	0.922566	132
H18	F	54	Health	This study	8484333600	6956786343	6955978630	0.819862	56562224	52704366	52697571	0.931674	132
H19	F	52	Health	This study	5977560000	4922254660	4911592052	0.821672	39850400	37098533	37016800	0.928894	133
H20	F	45	Health	This study	6194782800	5138651539	5015722800	0.809669	41298552	38444903	37513067	0.908339	134
H21	M	57	Health	This study	4411143000	3752162804	3749536974	0.850015	29407620	27820780	27801029	0.945368	135
H22	M	56	Health	This study	6193760100	5038276408	5037041876	0.813245	41291734	38090237	38080651	0.922234	132
H23	M	57	Health	This study	5678427900	4701947090	4700131487	0.827717	37856186	35117824	35103862	0.927295	134
H24	F	54	Health	This study	4207952100	3402299031	3272993806	0.777812	28053014	25618324	24616147	0.877487	133
H25	M	36	Health	This study	6769330200	5687882836	5682181666	0.839401	45128868	42305604	42262345	0.936481	134
H26	F	50	Health	This study	6787518000	5600028371	5597935162	0.82474	45250120	42369008	42352194	0.935958	132
H27	M	55	Health	This study	7435886100	5110390225	5106135154	0.686688	49572574	44487025	44448596	0.896637	115
H28	F	53	Health	This study	7145618100	5859226976	5857446089	0.819726	47637454	44431045	44416940	0.932395	132
H30	M	33	Health	This study	6478005300	5303290639	5226914029	0.806871	43186702	40216523	39633455	0.917724	132
H31	M	32	Health	This study	6232955400	4999952014	4998231892	0.801904	41553036	38449682	38435735	0.92498	130
H32	M	45	Health	This study	7000377900	5780832626	5777967958	0.825379	46669186	43509898	43487699	0.931829	133
P02	M	19	Patient	This study	6968046000	5763159982	5754903687	0.825899	46453640	43224637	43161835	0.929138	133
P03	M	20	Patient	This study	5746716600	4709134488	4684952297	0.81524	38311444	35531912	35346761	0.922616	133
P05	F	20	Patient	This study	6595593000	5514971033	5473499040	0.829872	43970620	41126647	40812842	0.928184	134
P13	M	25	Patient	This study	6431939700	5374413543	5372240066	0.835244	42879598	40182921	40166369	0.936724	134
P14	M	28	Patient	This study	6239779200	4873095307	4869079830	0.780329	41598528	36824796	36793608	0.884493	132
P15	M	28	Patient	This study	5883311700	4615916410	4613657366	0.784194	39222078	34786294	34768384	0.886449	133
P20	M	40	Patient	This study	6059725500	5043601244	5042165389	0.832078	40398170	37617633	37606600	0.930899	134
P21	F	43	Patient	This study	6321609600	5287717278	5285541714	0.836107	42144064	39317741	39299624	0.932507	134
P22	M	44	Patient	This study	6194058600	5170782911	4920904171	0.794456	41293724	38520900	36643739	0.887392	134
P25	F	56	Patient	This study	6053532900	5000244902	4992949319	0.824799	40356886	37483492	37427974	0.927425	133
P27	M	66	Patient	This study	6073383600	5050905095	5027564750	0.827803	40489224	37559989	37384983	0.923332	134
P29	M	73	Patient	This study	7343323800	5909594484	5906907798	0.804392	48955492	45060308	45039414	0.920007	131
P30	F	78	Patient	This study	5974507500	5036582557	5026442594	0.841315	39830050	37393200	37316711	0.936898	135
P31	M	32	Patient	This study	7808671500	4836377456	4811142328	0.616128	52057810	40955107	40737525	0.782544	118
P32	M	23	Patient	This study	6000070800	3601920896	3599886442	0.599974	40000472	30823440	30805701	0.770133	117
P33	F	25	Patient	This study	6010987500	3575345146	3572330392	0.5943	40073250	30698723	30672171	0.765403	116
P34	M	61	Patient	This study	5539645500	3271460261	3268795310	0.590073	36930970	28191001	28167636	0.76271	116
P35	F	68	Patient	This study	7710751200	4674355849	4661966507	0.604606	51405008	39951086	39843342	0.775087	117
P36	M	27	Patient	This study	4246215600	2533727617	2530279868	0.595891	28308104	21689608	21659627	0.765139	117
P37	M	25	Patient	This study	6960471300	4266726134	4263896339	0.612587	46403142	36440434	36415888	0.784772	117
P38	F	65	Patient	This study	7567568100	4653718613	4650633030	0.614548	50450454	39567492	39540547	0.78375	118
P39	M	30	Patient	This study	5893954800	3444183959	3402659527	0.577313	39293032	29613569	29249647	0.744398	116
P40	F	42	Patient	This study	5723760000	3270268984	3254037080	0.568514	38158400	28250649	28109768	0.73666	116
P41	M	20	Patient	This study	7650075000	4410572921	4408933091	0.576325	51000500	37993616	37979173	0.744682	116
P42	F	53	Patient	This study	8871293400	5440768773	5436927467	0.612868	59141956	46442390	46408729	0.784701	117
P43	F	35	Patient	This study	7587953100	4824161703	4749109946	0.625875	50586354	40578414	39937210	0.789486	119
P44	M	40	Patient	This study	6176611800	3271903832	3270080354	0.529429	41177412	28744101	28727868	0.697661	114
P45	M	45	Patient	This study	5002001700	2996345543	2991590005	0.598079	33346678	25528138	25486847	0.764299	117
P46	M	26	Patient	This study	5834350500	3429603937	3285240961	0.563086	38895670	29360280	28102752	0.722516	117
P47	M	26	Patient	This study	4139193000	2333633757	2332352379	0.56348	27594620	20150778	20139494	0.729834	116
PRF01	M	17	Test-P	This study	6584513100	5501902924	5435738260	0.825534	43896754	40953234	40454010	0.921572	134
PRF02	M	24	Test-P	This study	5692123800	4693436900	4361123846	0.766168	37947492	35271336	32748083	0.862984	133
PRF03	M	24	Test-P	This study	5766448200	4750566517	4728172168	0.819945	38442988	35725831	35555688	0.924894	133
PRF04	F	29	Test-P	This study	5138289000	4023999271	3906851246	0.760341	34255260	30364145	29464192	0.860136	133
PRF05	M	29	Test-P	This study	4955149200	3840930465	3825627859	0.772051	33034328	29083937	28965773	0.876839	132
PRF06	M	36	Test-P	This study	4142321700	3178174575	3172324250	0.765832	27615478	24052124	24006888	0.869327	132
PRF07	M	36	Test-P	This study	5483858400	4271784054	4257326512	0.776338	36559056	32343340	32230573	0.881603	132
PRF08	M	46	Test-P	This study	6808965000	5616361469	5448694432	0.800224	45393100	42303633	41021213	0.903688	133
PRF09	M	52	Test-P	This study	6572995800	5465032459	5461242379	0.83086	43819972	40627334	40598608	0.926486	135
PRF10	M	63	Test-P	This study	5973783000	4898304817	4875972942	0.816229	39825220	36697793	36529495	0.917245	133
PRF11	M	70	Test-P	This study	5610867000	4622024178	4619664073	0.823342	37405780	34668611	34650572	0.926343	133
PRF12	M	20	Test-P	This study	7913116800	6591949394	6587456909	0.832473	52754112	49321785	49287498	0.934287	134
PRF13	F	21	Test-P	This study	8020088700	6777845072	6740891308	0.840501	53467258	50253362	49977740	0.934735	135
PRF14	M	22	Test-P	This study	5607699000	4618772003	4561076386	0.81336	37384660	34739248	34299669	0.91748	133
PRF15	M	23	Test-P	This study	6179194200	5199656247	5190575369	0.840008	41194628	38702879	38633805	0.937836	134
PRF16	M	24	Test-P	This study	7064272500	5877273208	5874847890	0.831628	47095150	44353709	44335085	0.941394	133
BGI002A	F	21	Test-H	Qin et al. 2012	3972802320	3707617863	3707543031	0.933231	44142248	43825952	43824820	0.992809	84.5992
BGI003A	F	27	Test-H	Qin et al. 2012	4461401700	4129683003	4129502673	0.925607	49571130	49286888	49284303	0.994214	83.7894
BGI-06A	M	28	Test-H	Qin et al. 2012	4491377820	4184924093	4184877418	0.931758	49904198	49503926	49503169	0.991964	84.5376
BGI-15A	F	26	Test-H	Qin et al. 2012	1836037080	1700108797	1700092216	0.925957	20400412	20223707	20223461	0.991326	84.0653
BGI-17A	F	27	Test-H	Qin et al. 2012	1757297880	1658663446	1658648195	0.943863	19525532	19446397	19446164	0.995935	85.2944
BGI-28A	M	27	Test-H	Qin et al. 2012	3607383960	2961395504	2960072075	0.820559	40082044	39301512	39281229	0.980021	75.3559
N003A	M	48	Test-H	Qin et al. 2012	3268106640	2737476147	2736619187	0.837371	36312296	35753812	35740771	0.984261	76.5686
N006A	F	53	Test-H	Qin et al. 2012	4301442360	3534831798	3533196916	0.821398	47793804	46933526	46908242	0.981471	75.3215
N013A	F	61	Test-H	Qin et al. 2012	4074154560	3341700555	3340432303	0.819908	45268384	44410438	44390672	0.980611	75.2508
N024A	F	55	Test-H	Qin et al. 2012	4325127300	3488576736	3487153955	0.806255	48056970	47078610	47056467	0.979181	74.1057
N037A	F	53	Test-H	Qin et al. 2012	4041724680	3316685572	3315154104	0.820233	44908052	43900854	43877461	0.977051	75.5548
N038A	F	52	Test-H	Qin et al. 2012	4014355140	3287212313	3286004359	0.818563	44603946	43729765	43711261	0.979986	75.1752
N043A	F	55	Test-H	Qin et al. 2012	4052339820	3695692782	3695663272	0.911983	45025998	44727889	44727416	0.993369	82.6264
N046A	F	56	Test-H	Qin et al. 2012	6529403880	6126625469	6126571473	0.938305	72548932	72187657	72186804	0.995008	84.8711
N052A	F	46	Test-H	Qin et al. 2012	4738481820	4389703226	4389613638	0.926376	52649798	52275806	52274396	0.99287	83.9725
N082A	M	57	Test-H	Qin et al. 2012	3267027180	3078602222	3078539206	0.942306	36300302	36119334	36118385	0.994989	85.2347
N084A	M	53	Test-H	Qin et al. 2012	4619154420	4311207996	4311149272	0.93332	51323938	50911876	50910953	0.991953	84.6802
N087A	M	50	Test-H	Qin et al. 2012	4247998740	4036808221	4036740252	0.950269	47199986	46929763	46928762	0.994254	86.0185
N089A	F	50	Test-H	Qin et al. 2012	3155822820	2969216746	2969164369	0.940853	35064698	34858538	34857769	0.994099	85.1794
SZEY-26A	F	42	Test-H	Qin et al. 2012	3675597480	3436016927	3435917754	0.934792	40839972	40466218	40464620	0.990809	84.9117
SZEY-38A	F	49	Test-H	Qin et al. 2012	1324305360	1227566126	1227556061	0.926943	14714504	14648364	14648210	0.995495	83.8025
SZEY-43A	F	44	Test-H	Qin et al. 2012	1345322520	1269154321	1269141659	0.943374	14948028	14904612	14904418	0.997083	85.152
SZEY-58A	M	40	Test-H	Qin et al. 2012	4116281940	3889163330	3889114134	0.944812	45736466	45471089	45470353	0.994182	85.5308
SZEY-63A	M	45	Test-H	Qin et al. 2012	3770379180	3561339650	3561304607	0.944548	41893102	41641721	41641171	0.993986	85.5236
SZEY-68A	M	53	Test-H	Qin et al. 2012	5381556480	5053365276	5053292054	0.939002	59795072	59421574	59420494	0.993736	85.0429
SZEY-69A	M	54	Test-H	Qin et al. 2012	4122843840	3831728430	3831659319	0.929373	45809376	45514973	45513951	0.993551	84.1865
SZEY-73A	F	48	Test-H	Qin et al. 2012	2760987960	2569639047	2569618596	0.930688	30677644	30456539	30456217	0.992782	84.3709
SZEY-75A	F	39	Test-H	Qin et al. 2012	5092276500	4681683940	4681648872	0.919363	56580850	56229946	56229367	0.993788	83.2599
SZEY-81A	F	42	Test-H	Qin et al. 2012	3470862060	3205603798	3205555548	0.923562	38565134	38237046	38236303	0.991473	83.8354
T2D-83A	M	56	Test-H	Qin et al. 2012	5160421260	4800179069	4800080628	0.930172	57338014	56916600	56915046	0.992623	84.3376

## Sheet: Table S2
Table S2 Relative abundance profile at the phylum level of 91 samples
Phylum	H01	H02	H03	H04	H05	H06	H07	H08	H09	H10	H11	H12	H13	H14	H15	H16	H17	H18	H19	H20	H21	H22	H23	H24	H25	H26	H27	H28	H30	H31	H32	P02	P03	P05	P13	P14	P15	P20	P21	P22	P25	P27	P29	P30	P31	P32	P33	P34	P35
k__Bacteria|p__Actinobacteria	2.73213	13.7473	1.46289	1.28892	8.66791	0.67426	0.04757	1.48286	2.32757	0.44864	0.16268	3.58093	7.09356	1.15913	2.24379	0.153802	1.65853	0.16769	23.9174	1.07195	5.08817	1.97146	1.36581	7.0954	1.40356	5.89345	15.5558	1.49925	8.28824	4.39317	1.10603	0.570206	0.2099	0.290109	0.34513	0.02546	0.197	0.05547	0.30686	53.0404	29.4639	2.76735	0.568117	6.177	0.717166	5.18078	0.59023	0.86821	0.07584
k__Bacteria|p__Bacteroidetes	36.7598	36.8388	23.1931	20.0878	16.8339	65.4999	60.3031	50.4724	69.4634	75.0588	70.1491	44.5228	45.1973	47.8632	47.3893	67.9356	67.4504	48.1498	49.0852	33.3193	33.9052	56.4804	80.0292	18.6003	45.1051	41.5158	24.8386	47.4229	19.136	72.1258	53.3775	46.7771	68.4964	72.8554	66.2081	86.4158	56.5973	84.0925	78.3038	2.44992	45.4685	68.3094	64.9794	58.7575	79.3236	79.0546	64.7181	66.9046	67.8688
k__Bacteria|p__CandidatusSaccharibacteria	0	0	0	0	0.00125171	0	0	0	0	0.00215	0	0	0.0171513	0.00185001	0	0	0	0	0	0	0.00711	0.0019	0.0158799	0.0111036	0	0	0.0297	0.0145223	0.00707687	0.00164	0	0	0	0	0	0	0	0	0.01143	0	0	0	0	0	0	0	0	0	0
k__Bacteria|p__Chlorobi	0	0	0	0	0	0	0	0	0	0	0	0	0	0	0	0	0	0	0	0	0	0	0	0	0	0	0	0	0	0	0	0	0	0	0	0	0	0	0	0	0	0	0	0	0	0	0	0	0
k__Bacteria|p__Cyanobacteria	0	0	0	0	0	0	0	0	0	0	0	0	0	0	0	0	0	0	0	0	0	0	0	0	0	0	0	0	0	0	0	0	0	0	0	0	0	0	0	0	0	0	0	0	0	0	0	0	0
k__Bacteria|p__Deinococcus-Thermus	0	0	0	0	0	0	0	0	0	0	0	0	0	0	0	0	0	0	0	0	0	0	0	0	0	0	0	0	0	0	0	0	0	0	0	0	0	0	0	0	0	0	0	0	0	0	0	0	0
k__Bacteria|p__Firmicutes	55.4239	46.1674	69.8948	61.7849	53.9778	10.1948	38.4888	45.4728	21.557	16.8913	27.5101	41.8033	18.4678	28.0222	44.1313	28.5718	27.1739	35.2926	20.7061	56.2307	59.2351	35.8582	16.7038	51.3026	47.5669	44.6678	50.6424	49.4092	50.2664	22.7182	43.3251	51.0349	24.2009	26.4429	31.6753	13.0824	37.0272	9.10544	20.3888	40.3571	24.6243	24.4108	31.845	30.147	17.3561	7.8598	31.9853	27.7735	19.2468
k__Bacteria|p__Fusobacteria	0	0	0	0	0.0728498	0.11958	0	0	0	6.47016	0	0	0	0.00807003	0	0	0	0.05773	0	0	0	0	0	0	0	0	0	0	0	0.12276	0	0.0241598	7.07985	0	0.07848	0	0.22784	0	0	0	0	0	0	0	0	0	0	0	0
k__Bacteria|p__Proteobacteria	5.06293	3.23478	3.84585	16.8371	20.3745	23.5114	1.16053	2.55031	6.65204	1.12901	2.17808	10.093	29.2242	22.9455	5.84671	3.33878	3.71716	16.3322	6.29127	9.37485	1.76441	5.20272	1.88525	22.9875	5.92053	3.50489	8.9152	1.64652	22.2993	0.63843	1.06194	1.59367	0.01303	0.41157	1.6869	0.47636	5.81337	6.74655	0.98917	4.15253	0.427376	4.51245	2.6075	4.9185	2.60318	7.90486	2.70637	4.45367	12.7164
k__Bacteria|p__Synergistetes	0	0	0	0.00125908	0	0	0	0	0	0	0	0	0	0	0	0	0	0	0	0.00317653	0	0	0	0	0	0	0	0	0	0	0	0	0	0	0.00608	0	0	0	0	0	0	0	0	0	0	0	0	0	0.09221
k__Bacteria|p__Verrucomicrobia	0.0212131	0.0116637	1.60337	0	0.0718184	0	0	0.0217227	0	0	0	0	0	0	0.38889	0	0	0	0	0	0	0.48531	0	0.00313101	0.00393	4.41805	0.0183	0.00759163	0.0029771	0	1.12935	0	0	0	0	0	0.13728	0	0	0	0.0159036	0	0	0	0	0	0	0	0
[truncated: 12 more columns]

## Sheet: Table S3
Table S3 Relative abundance profile at the genus level of 91 samples
Genus	H01	H02	H03	H04	H05	H06	H07	H08	H09	H10	H11	H12	H13	H14	H15	H16	H17	H18	H19	H20	H21	H22	H23	H24	H25	H26	H27	H28	H30	H31	H32	P02	P03	P05	P13	P14	P15	P20	P21	P22	P25	P27	P29	P30	P31	P32	P33	P34	P35
k__Bacteria|p__Actinobacteria|c__Actinobacteria|o__Actinomycetales|f__Actinomycetaceae|g__Actinomyces	0	0	0	0.0298754	0.0393138	0	0	0	0	0	0	0	0	0.00467002	0	0	0	0	0	0.00097262	0	0	0	0.000350113	0	0	0.01057	0	0	0.00384	0	0	0.00593	0	0	0.00113	0	0	0	0.04419	0.000700158	0.0244	0	0	0	0	0	0.00821	0
k__Bacteria|p__Actinobacteria|c__Actinobacteria|o__Actinomycetales|f__Dermabacteraceae|g__Brachybacterium	0	0	0	0	0	0	0	0	0	0	0	0	0	0	0	0	0	0	0	0	0	0	0	0	0	0	0	0	0	0	0	0	0	0	0	0	0	0	0	0	0	0	0	0	0	0	0	0	0
k__Bacteria|p__Actinobacteria|c__Actinobacteria|o__Actinomycetales|f__Dermatophilaceae|g__Dermatophilaceae_unclassified	0	0	0	0	0	0	0	0	0	0	0	0	0	0	0	0	0	0	0	0	0	0	0	0	0	0	0	0	0	0	0	0	0	0	0	0	0	0	0	0	0	0	0	0	0	0.02821	0	0	0
k__Bacteria|p__Actinobacteria|c__Actinobacteria|o__Actinomycetales|f__Microbacteriaceae|g__Clavibacter	0	0	0	0	0	0	0	0	0	0	0	0	0	0	0	0	0	0	0	0	0	0	0	0	0	0	0	0	0	0	0	0	0	0	0	0	0	0	0	0	0	0	0	0	0	0	0	0	0
k__Bacteria|p__Actinobacteria|c__Actinobacteria|o__Actinomycetales|f__Micrococcaceae|g__Kocuria	0	0	0	0	0	0	0	0	0	0	0	0	0	0	0	0	0	0	0	0	0	0	0	0	0	0	0	0	0	0	0	0	0	0	0	0	0	0	0	0	0	0	0	0	0	0	0	0	0
k__Bacteria|p__Actinobacteria|c__Actinobacteria|o__Actinomycetales|f__Micrococcaceae|g__Rothia	0	0	0.0143804	0.0921847	0.325175	0	0.00437	0	0	0.01462	0	0.00585	0.0082028	0.0795803	0.00337	0.00127001	0	0	0.00335	0.0184073	0.00718	0	0	0.068452	0	0.01234	0.12611	0.00411631	0.00576374	0.08186	0.02485	0	0.02032	0	0.00476	0	0	0	0	0.00755	0	0.00532	0	0	0	0	0.00024	0	0.00465
k__Bacteria|p__Actinobacteria|c__Actinobacteria|o__Actinomycetales|f__Mycobacteriaceae|g__Mycobacterium	0	0	0	0	0	0	0	0	0	0	0	0	0	0	0	0	0	0	0	0	0	0	0	0	0	0	0	0.00454697	0	0	0	0	0	0	0	0	0	0	0	0	0	0	0	0	0	0	0	0	0
k__Bacteria|p__Actinobacteria|c__Actinobacteria|o__Actinomycetales|f__Propionibacteriaceae|g__Propionibacteriaceae_unclassified	0	0	0	0	0	0	0	0	0	0	0	0	0	0	0	0	0	0	0	0	0	0	0	0	0	0	0.00619	0	0	0	0	0	0.0065	0	0	0	0	0	0	0	0	0	0	0	0	0	0	0	0
k__Bacteria|p__Actinobacteria|c__Actinobacteria|o__Actinomycetales|f__Propionibacteriaceae|g__Propionibacterium	0	0	0	0	0	0	0	0	0	0	0	0	0	0	0	0	0	0	0	0	0.01219	0	0	0.00184059	0	0	0	0	0	0	0	0	0	0	0	0	0	0	0	0	0	0	0	0	0	0	0	0	0
k__Bacteria|p__Actinobacteria|c__Actinobacteria|o__Bifidobacteriales|f__Bifidobacteriaceae|g__Bifidobacterium	2.47865	13.4658	1.30511	0.963316	8.27812	0.50462	0	1.02145	2.06311	0.04034	0.03789	2.41328	5.71475	0.567542	2.03251	0.0206402	1.50941	0	22.4252	0.827141	3.25248	1.50656	1.15516	6.57371	1.22386	5.00599	10.3383	1.35478	7.77834	3.84197	0.81256	0.351345	0	0	0.21777	0.01759	0.0803	0	0.2906	52.9733	29.4596	2.57665	0	4.77904	0.339124	5.14661	0.03712	0.81253	0
k__Bacteria|p__Actinobacteria|c__Actinobacteria|o__Bifidobacteriales|f__Bifidobacteriaceae|g__Gardnerella	0	0	0	0	0	0	0	0	0	0	0.00232	0	0	0	0	0	0	0	0	0	0	0	0	0	0	0	0	0	0	0	0	0	0	0.0221896	0	0	0	0	0	0	0	0	0	0	0	0	0	0	0
k__Bacteria|p__Actinobacteria|c__Actinobacteria|o__Bifidobacteriales|f__Bifidobacteriaceae|g__Parascardovia	0	0	0	0	0	0	0	0	0	0	0	0	0	0	0	0	0	0	0	0	0	0	0	0	0	0	0	0	0	0	0	0	0	0	0	0	0	0	0	0	0.00366083	0	0	0	0	0	0	0	0
k__Bacteria|p__Actinobacteria|c__Actinobacteria|o__Bifidobacteriales|f__Bifidobacteriaceae|g__Scardovia	0	0	0	0	0	0	0	0	0	0	0	0	0	0	0.00019	0	0	0	0	0	0	0	0	0	0	0	0	0	0	0.0051	0	0	0.17716	0	0	0.00351	0	0	0	0	0	0.01764	0.0375924	0	0	0	0	0.04747	0.02402
k__Bacteria|p__Actinobacteria|c__Actinobacteria|o__Coriobacteriales|f__Coriobacteriaceae|g__Adlercreutzia	0.00890548	0.0757345	0.0340009	0	0	0	0	0.00659082	0	0	0.02426	0.02255	0	0	0.0145	0	0.07046	0.01632	0	0.0606439	0	0.04089	0.000970607	0	0.03591	0.2367	0	0.000991519	0	0	0	0	0	0	0	0	0	0	0	0	0	0	0	0	0	0.00596	0	0	0.00451
k__Bacteria|p__Actinobacteria|c__Actinobacteria|o__Coriobacteriales|f__Coriobacteriaceae|g__Atopobium	0	0.0010786	0	0.00494566	0.0213392	0	0	0	0	0	0	0.00146	0	0.00594002	0.00092	0	0	0	0	0	0	0	0	0	0	0	0.01348	0	0	0.01055	0	0	0	0	0	0	0	0	0	0.01443	0	0	0	0	0	0	0	0	0
k__Bacteria|p__Actinobacteria|c__Actinobacteria|o__Coriobacteriales|f__Coriobacteriaceae|g__Collinsella	0.230242	0.162414	0.106193	0.194361	0	0.16964	0.04319	0.454017	0.25459	0.39368	0.09338	1.12195	1.37062	0.501402	0.19231	0.128552	0	0.15137	1.42561	0	1.72647	0.40629	0.209691	0.451045	0.1151	0	5.06123	0.134817	0.504132	0.44985	0	0.218861	0	0.267909	0.1226	0	0.08242	0	0	0	0	0.10372	0	1.33802	0.375009	0	0.05447	0	0.0388
k__Bacteria|p__Actinobacteria|c__Actinobacteria|o__Coriobacteriales|f__Coriobacteriaceae|g__Coriobacteriaceae_noname	0	0	0.00319008	0	0	0	0	0	0	0	0	0	0	0	0	0	0	0	0	0	0	0	0	0	0	0	0	0	0	0	0	0	0	0	0	0	0	0	0	0	0	0	0	0.00558	0	0	0	0	0
k__Bacteria|p__Actinobacteria|c__Actinobacteria|o__Coriobacteriales|f__Coriobacteriaceae|g__Cryptobacterium	0	0	0	0	0	0	0	0	0	0	0	0	0	0	0	0	0	0	0	0	0	0	0	0	0	0	0	0	0	0	0	0	0	0	0	0	0	0	0	0.00086	0	0	0	0	0	0	0	0	0
k__Bacteria|p__Actinobacteria|c__Actinobacteria|o__Coriobacteriales|f__Coriobacteriaceae|g__Eggerthella	0.00387238	0.0423191	0	0	0.00396543	0	0	0	0	0	0.00483	0	0	0	0	0.00335004	0.07865	0	0.00042	0.134522	0.08985	0.01772	0	0	0.01748	0.52787	0	0	0	0	0.25118	0	0	0	0	0.00323	0.03429	0.05547	0.01583	0	0	0.03962	0.520183	0.05436	0	0	0.45914	0	0.00386
k__Bacteria|p__Actinobacteria|c__Actinobacteria|o__Coriobacteriales|f__Coriobacteriaceae|g__Gordonibacter	0.0104664	0	0	0	0	0	0	0.0008001	0.00987	0	0	0.01584	0	0	0	0	0	0	0	0.030265	0	0	0	0	0.01121	0.11055	0	0	0	0	0.01744	0	0	0	0	0	0	0	0.00042	0	0	0	0.0103407	0	0.00303269	0	0.03926	0	0
k__Bacteria|p__Actinobacteria|c__Actinobacteria|o__Coriobacteriales|f__Coriobacteriaceae|g__Olsenella	0	0	0	0	0	0	0	0	0	0	0	0	0	0	0	0	0	0	0.06288	0	0	0	0	0	0	0	0	0	0	0	0	0	0	0	0	0	0	0	0	0	0	0	0	0	0	0	0	0	0
k__Bacteria|p__Actinobacteria|c__Actinobacteria|o__Coriobacteriales|f__Coriobacteriaceae|g__Slackia	0	0	0	0.00425065	0	0	0	0	0	0	0	0	0	0	0	0	0	0	0	0	0	0	0	0	0	0	0	0	0	0	0	0	0	0	0	0	0	0	0	9e-05	0	0	0	0	0	0	0	0	0
k__Bacteria|p__Bacteroidetes|c__Bacteroidia|o__Bacteroidales|f__Bacteroidaceae|g__Bacteroides	24.7119	13.8952	11.069	18.4807	14.5351	61.9629	10.2432	41.0427	2.64727	13.3423	24.7798	17.9204	44.1234	43.1977	25.2308	9.14436	43.3869	5.34867	0.64049	24.2211	32.9653	25.118	0.8633	16.3121	41.1224	37.0811	22.0493	38.8108	16.8687	66.3668	48.5175	25.7267	68.4885	3.28358	21.8627	7.53609	16.6709	66.1496	70.5706	2.28365	45.4414	65.8176	23.8172	37.5711	12.1939	69.9623	59.0254	52.1826	54.7698
k__Bacteria|p__Bacteroidetes|c__Bacteroidia|o__Bacteroidales|f__Bacteroidales_noname|g__Bacteroidales_noname	0.087764	5.22663	0.0939224	0.0169321	0.0121266	0	0.00471	0.00924115	0.07566	0	0.36228	0.50139	0	0.0911204	0.95038	0	0.49718	0.16117	0	0	0	0.0721	0	0.03107	0.19161	0	0.03254	0.223312	0.0275256	0	0.49877	1.21606	0	0	0.19039	0	0.00571	0	0.11119	0	0	0	0	6.199	0.0312398	0	0	0	0.47187
k__Bacteria|p__Bacteroidetes|c__Bacteroidia|o__Bacteroidales|f__Porphyromonadaceae|g__Barnesiella	0.270326	1.08251	1.11842	0.0225526	0.271352	0	0.90506	0.991974	0.34759	0.06949	0.5051	1.17696	0.043765	0.135151	0	0	0	0	0	0	0.04672	0.00576	0.00292183	0.240247	0.28527	0	0	0.676216	0.279957	0.18387	0	1.2258	0	0	0	0	0	0	0.71794	0	0	0	0	0	0.392942	0.15892	0	0	5.66722
k__Bacteria|p__Bacteroidetes|c__Bacteroidia|o__Bacteroidales|f__Porphyromonadaceae|g__Butyricimonas	0	0.027684	0	0	0	0	0	0	0	0	0	0	0	0	0.00018	0	0	0	0	0.0702873	0	0	0	0	0	0	0	0	0	0	0	0	0	0	0	0	0	0	0	0	0	0	0	0.00065	0	0	0	0	0
k__Bacteria|p__Bacteroidetes|c__Bacteroidia|o__Bacteroidales|f__Porphyromonadaceae|g__Coprobacter	0	0.252593	0	0	0	0	0.17388	0.0360345	0	0	0	0.32103	0	0.0793003	0.09414	0	0	0	0	0	0	0	0	0	0.11729	0	0	0.0424651	0	0	0	0	0	0	0	0.59332	0	0	0	0	0	0	0.247146	0	0	0.16109	0	0	0
k__Bacteria|p__Bacteroidetes|c__Bacteroidia|o__Bacteroidales|f__Porphyromonadaceae|g__Dysgonomonas	0	0	0	0	0	0	0	0	0	0	0	0	0	0	0	0	0	0	0	0	0	0	0	0	0	0	0	0	0	0	0	0	0	0	0	0	0	0	0	0	0	0	0	0	0	0	0	0	0
k__Bacteria|p__Bacteroidetes|c__Bacteroidia|o__Bacteroidales|f__Porphyromonadaceae|g__Odoribacter	0.607084	2.10585	1.8942	0.0710221	0.298819	0.15601	0.20872	0.502393	0.46245	0	5.03049	1.344	0.00662068	0.447962	1.33724	0	3.18732	0	0.00606	0.336319	0.02005	1.27118	0	0.0213869	0.38737	0	0	0.95294	0.027255	0	0	0.669026	0	0	1.58913	0	0.00361	0	0.41187	0	0.0039909	0.03526	0	2.1844	0	0	0.10849	0	0
k__Bacteria|p__Bacteroidetes|c__Bacteroidia|o__Bacteroidales|f__Porphyromonadaceae|g__Parabacteroides	6.56691	3.63414	0.988885	0.125324	0.597058	1.27666	1.73114	3.09396	0.55977	0.45638	1.91176	0.74644	0.440724	0.585442	1.68022	0.324434	2.17297	0.56327	0.07778	1.81269	0.46627	1.90938	0.344305	0.647088	0.791	0	2.24436	2.84294	0.590548	5.4214	3.60161	2.38935	0	2.1495	3.84307	0.78549	9.76272	17.943	4.52085	0.14378	0.0140032	2.37143	22.5411	11.1718	0.732573	5.00177	5.0857	14.7132	3.15196
k__Bacteria|p__Bacteroidetes|c__Bacteroidia|o__Bacteroidales|f__Porphyromonadaceae|g__Porphyromonas	0	0	0	0	0	0	0	0	0	0	0	0	0	0	0	0	0	0	0.0006	0	0	0	0	0	0	0	0	0	0	0	0	0.000955589	0	0	0	0	0	0	0	0	0	0	0	0	0.00270812	0	0	0	0
k__Bacteria|p__Bacteroidetes|c__Bacteroidia|o__Bacteroidales|f__Prevotellaceae|g__Alloprevotella	0	0	0	0	0.0104443	0	0	0	0	0	0	0	0	0	0	0	0	0	0	0	0	0	0.00324203	0	0	0.00801	0	0	0	0	0	0	0	0	0	0	0	0	0	0	0	0	0	0	0	0	0	0	0
k__Bacteria|p__Bacteroidetes|c__Bacteroidia|o__Bacteroidales|f__Prevotellaceae|g__Paraprevotella	0.24404	1.82339	2.50159	0.743703	0	1.62529	3.3906	0	0.27601	0.43187	0	0.56669	0.52245	0.0757303	1.43658	0	1.33307	0.60611	0	0	0	3.48164	0.0581864	0.602654	0	1.12386	0	0.551355	0.701773	0	0	1.33779	0	0	0.16616	0	2.39298	0	0	0	0	0.03713	0	0	1.68817	0.27732	0	0	2.66222
k__Bacteria|p__Bacteroidetes|c__Bacteroidia|o__Bacteroidales|f__Prevotellaceae|g__Prevotella	0.00272168	0.0104053	1.21171	0.00849123	0.0433794	0.00333	39.6981	0.00637079	64.1065	60.6191	22.11	5.37606	0.0151459	0.00306001	0.01347	58.4613	0.00477	40.1848	48.3457	0.0112679	0.0631	23.1576	78.752	0.0454346	0.0028	0.04331	0.04249	0.0139814	0.00981339	0.01125	0.00986	1.30466	0.00782	67.2277	30.5801	77.141	27.2111	0	0.00292	0.02249	0.00911205	0.00436	0.0185412	0.03419	62.8427	0.01476	0.00537	0.00063	0.01041
k__Bacteria|p__Bacteroidetes|c__Bacteroidia|o__Bacteroidales|f__Rikenellaceae|g__Alistipes	4.2691	8.78042	4.31535	0.619094	1.06556	0.4758	3.94767	4.78965	0.98811	0.13968	15.4497	16.5698	0.0452061	3.24189	16.6462	0.00547006	16.8681	1.28578	0.01453	6.86761	0.34373	1.46463	0.00526329	0.700265	2.20737	3.24703	0.4699	3.3089	0.630473	0.14243	0.74986	12.9068	0	0.194595	7.97648	0.35987	0.55031	0	1.96351	0	0	0.04356	18.3554	1.59638	1.43937	3.47842	0.49316	0	1.13525
k__Bacteria|p__Bacteroidetes|c__Flavobacteriia|o__Flavobacteriales|f__Flavobacteriaceae|g__Cellulophaga	0	0	0	0	0	0	0	0	0	0	0	0	0	0.00586002	0	0	0	0	0	0	0	0	0	0	0	0.01248	0	0	0	0	0	0	0	0	0	0	0	0	0.00491	0	0	0	0	0	0	0	0	0.00814	0
k__Bacteria|p__Bacteroidetes|c__Flavobacteriia|o__Flavobacteriales|f__Flavobacteriaceae|g__Myroides	0	0	0	0	0	0	0	0	0	0	0	0	0	0	0	0	0	0	0	0	0	0	0	0	0	0	0	0	0	0	0	0	0	0	0	0	0	0	0	0	0	0	0	0	0	0	0	0	0
k__Bacteria|p__Bacteroidetes|c__Flavobacteriia|o__Flavobacteriales|f__Flavobacteriaceae|g__Riemerella	0	0	0	0	0	0	0	0	0	0	0	0	0	0	0	0	0	0	0	0	0	0	0	0	0	0	0	0	0	0	0	0	0	0	0	0	0	0	0	0	0	0	0	0	0	0	0	0	0
k__Bacteria|p__Bacteroidetes|c__Sphingobacteriia|o__Sphingobacteriales|f__Sphingobacteriaceae|g__Pedobacter	0	0	0	0	0	0	0	0	0	0	0	0	0	0	0	0	0	0	0	0	0	0	0	0	0	0	0	0	0	0	0	0	0	0	0	0	0	0	0	0	0	0	0	0	0	0	0	0	0
k__Bacteria|p__Bacteroidetes|c__Sphingobacteriia|o__Sphingobacteriales|f__Sphingobacteriaceae|g__Sphingobacterium	0	0	0	0	0	0	0	0	0	0	0	0	0	0	0	0	0	0	0	0	0	0	0	0	0	0	0	0	0	0	0	0	0	0	0	0	0	0	0	0	0	0	0	0	0	0	0	0	0
k__Bacteria|p__Candidatus_Saccharibacteria|c__Candidatus_Saccharibacteria_noname|o__Candidatus_Saccharibacteria_noname|f__Candidatus_Saccharibacteria_noname|g__Candidatus_Saccharibacteria_noname	0	0	0	0	0.00113155	0	0	0	0	0	0	0	0.00664084	0	0	0	0	0	0	0	0.00087	0	0.0145991	0.00409132	0	0	0.02203	0	0.00582388	0	0	0	0	0	0	0	0	0	0.00046	0	0	0	0	0	0	0	0	0	0
k__Bacteria|p__Candidatus_Saccharibacteria|c__Candidatus_Saccharibacteria_noname|o__Candidatus_Saccharibacteria_noname|f__Candidatus_Saccharibacteria_noname|g__Candidatus_Saccharibacteria_noname_unclassified	0	0	0	0	0.000120165	0	0	0	0	0.00215	0	0	0.0105105	0.00185001	0	0	0	0	0	0	0.00624	0.0019	0.0012808	0.00701226	0	0	0.00767	0.0145223	0.00124296	0.00164	0	0	0	0	0	0	0	0	0.01097	0	0	0	0	0	0	0	0	0	0
k__Bacteria|p__Chlorobi|c__Chlorobia|o__Chlorobiales|f__Chlorobiaceae|g__Chlorobium	0	0	0	0	0	0	0	0	0	0	0	0	0	0	0	0	0	0	0	0	0	0	0	0	0	0	0	0	0	0	0	0	0	0	0	0	0	0	0	0	0	0	0	0	0	0	0	0	0
k__Bacteria|p__Cyanobacteria|c__Cyanobacteria_noname|o__Oscillatoriales|f__Oscillatoriales_noname|g__Arthrospira	0	0	0	0	0	0	0	0	0	0	0	0	0	0	0	0	0	0	0	0	0	0	0	0	0	0	0	0	0	0	0	0	0	0	0	0	0	0	0	0	0	0	0	0	0	0	0	0	0
k__Bacteria|p__Deinococcus_Thermus|c__Deinococci|o__Deinococcales|f__Deinococcaceae|g__Deinococcus	0	0	0	0	0	0	0	0	0	0	0	0	0	0	0	0	0	0	0	0	0	0	0	0	0	0	0	0	0	0	0	0	0	0	0	0	0	0	0	0	0	0	0	0	0	0	0	0	0
k__Bacteria|p__Firmicutes|c__Bacilli|o__Bacillales|f__Bacillales_noname|g__Gemella	0	0.00875568	0	0.00457297	0.0280985	0	0.00033	0	0	0.03231	0	0	0.00711446	0.00198001	0	0.00581007	0	0	0	0	0.00868	0	0	0.028079	0	0	0.00439	0	0.000240573	0.00039	0.00401	0	0	0	0.00119	0	0	0	0.00089	0.00183	0	0	0	0	0	0	0	0	0.00028
k__Bacteria|p__Firmicutes|c__Bacilli|o__Lactobacillales|f__Aerococcaceae|g__Abiotrophia	0	0	0	0	0.0286893	0	0	0	0	0	0	0	0	0	0	0	0	0	0	0	0	0	0	0.0313801	0	0	0.04919	0	0.00887114	0	0	0	0	0	0.00576	0	0	0	0	0	0	0	0	0	0	0.00586	0	0	0
k__Bacteria|p__Firmicutes|c__Bacilli|o__Lactobacillales|f__Carnobacteriaceae|g__Granulicatella	0.000720444	0	0	0.00985103	0.101689	0	0	0.00166021	0	0.00935	0	0.04014	0.0439867	0.0205101	0	0.0149202	0	0.00408	0	0	0.00693	0	0	0.0802458	0.01048	0	0.03315	0	0.0122492	0.04668	0.00721	0.00613862	0.09145	0.00560253	0.00252	0.00728	0	0	0	0.01578	0	0	0.00231015	0	0	0	0.00275	0	0.00457
k__Bacteria|p__Firmicutes|c__Bacilli|o__Lactobacillales|f__Enterococcaceae|g__Enterococcus	0	0	0	0	0	0.00327	0	0	0	0	0	0	0	0	0	0	0	0.03841	0	0.00943648	0	0	0	0	0	0	0	0	0	0	0	0	0.01602	0	0	0	0	0	0	1.03865	0	0	0	0	0	0	0	0	0
k__Bacteria|p__Firmicutes|c__Bacilli|o__Lactobacillales|f__Lactobacillaceae|g__Lactobacillus	0	0	0	0	0	0	0	0	0	0	0	0	0.0215349	0	0	0	0	0	1.23807	0	0	0	0.412888	0	0	0	0.02995	0	0	0.00043	0.04446	0.00497529	0	0	0.01425	0.15081	0	0	0	0.20478	0.295527	0	0.00735047	0.00247	0	0	0	0	0.0007
k__Bacteria|p__Firmicutes|c__Bacilli|o__Lactobacillales|f__Leuconostocaceae|g__Leuconostoc	0	0	0	0	0	0	0	0	0.00292	0	0	0	0	0.000990004	0.02624	0	0	0	0	0	0	0	0	0.0292994	0	0	0	0	0.0174716	0.05181	0	0	0	0	0.00378	0.00815	0	0	0	0	0.0100123	0	0	0	0	0	0	0	0
k__Bacteria|p__Firmicutes|c__Bacilli|o__Lactobacillales|f__Leuconostocaceae|g__Weissella	0	0	0.00273007	0.462122	0	0	0	0	0.0425	0	0	0	0	0.0254501	0.03627	0	0.01945	0	0	0	0	0	0	0.695644	0	0	0.29156	0	0.311302	0.00749	0.04018	0	0	0.00591322	0	0	0	0	0	0.00569	0	0	0	0	0	0	0	0	0
k__Bacteria|p__Firmicutes|c__Bacilli|o__Lactobacillales|f__Streptococcaceae|g__Lactococcus	0	0.00747616	0	0.182546	0	0	0	0	0.01379	0	0	0	0	0.0911704	0.09252	0	0	0	0	0.0710633	0	0	0	0	0	0	0	0	0	0	0	0	0	0	0	0	0	0	0	0	0	0	0	0	0	0	0	0	0
k__Bacteria|p__Firmicutes|c__Bacilli|o__Lactobacillales|f__Streptococcaceae|g__Streptococcus	0.107536	0.0960375	0.079742	2.79499	1.55237	0.17708	0.02353	0.0784598	0.05755	0.58881	0.06817	0.3039	1.41813	0.795773	0.38982	0.0545206	0.02491	0.08999	0.38766	0.0739088	0.05903	0.04955	0.33571	1.10406	0.14715	0.01745	1.1913	0.00999532	0.393307	1.09712	0.12454	0.279967	0.59775	0.192871	1.56788	0.02948	0.01174	0.01952	0.06608	0.19524	0.0745068	0.09715	0.0368924	0.01511	0.0579052	0.02969	0.95915	0.34674	0.1677
k__Bacteria|p__Firmicutes|c__Clostridia|o__Clostridiales|f__Clostridiaceae|g__Butyricicoccus	0	0	0	0	0	0	0	0	0	0	0	0	0	0	0	0	0	0	0	0	0	0	0	0	0	0	0	0	0	0	0	0	0	0	0	0	0	0	0	0	0	0	0	0	0	0	0	0	0
k__Bacteria|p__Firmicutes|c__Clostridia|o__Clostridiales|f__Clostridiaceae|g__Clostridiaceae_noname	0.00364224	0	0	0	0	0	0	0.00617077	0	0	0	0	0	0	0	0	0	0	0	0	0	0	0	0	0	0	0	0	0	0	0	0	0	0.00224502	0	0	0	0	0	0	0	0.01992	0	0	0	0.32369	0	0	0
k__Bacteria|p__Firmicutes|c__Clostridia|o__Clostridiales|f__Clostridiaceae|g__Clostridium	2.3338	6.1331	6.69459	0	0.558625	0.60226	0.00777	0.106933	0.01643	0.02033	0.17261	0.12495	0.251304	0.00305001	0.34351	0.000220003	0.24783	0.34144	0	1.39424	0.00055	0.00242	0	0.0121739	0.02854	0.02942	0.06469	6.89518	0.0105151	0.68664	0.08948	0.224314	0	0.0197642	1.26682	0.03043	1.21719	6.88522	0.29689	0.1154	0	1.49469	3.41179	0.83031	0.498153	0.18485	1.06948	1.14895	1.22956
k__Bacteria|p__Firmicutes|c__Clostridia|o__Clostridiales|f__Clostridiales_Family_XIII_Incertae_Sedis|g__Clostridiales_Family_XIII_Incertae_Sedis_noname	0	0	0	0	0.00573786	0	0	0	0	0	0	0	0	0.00205001	0	0	0.00463	0	0	0	0	0	0	0	0	0	0	0	0	0	0	0	0	0	0	0	0	0	0	0	0	0	0	0	0	0	0	0	0
k__Bacteria|p__Firmicutes|c__Clostridia|o__Clostridiales|f__Clostridiales_Family_XIII_Incertae_Sedis|g__Clostridiales_Family_XIII_Incertae_Sedis_unclassified	0	0	0	0.00464348	0.0140192	0	0	0.00489061	0	0	0	0.00673	0	0.0130701	0	0	0.00191	0	0	0	0	0	0	0	0	0	0.00321	0.00366562	0	0	0	0	0	0	0	0	0	0	0.0014	0	0	0.00165	0	0	0	0	0	0	0
k__Bacteria|p__Firmicutes|c__Clostridia|o__Clostridiales|f__Clostridiales_Family_XI_Incertae_Sedis|g__Anaerococcus	0	0	0	0	0	0	0	0	0	0	0	0	0	0	0	0	0	0	0	0	0	0	0	0	0	0	0	0	0	0	0	0	0	0	0	0	0	0	0	0	0	0	0	0	0	0	0	0	0
k__Bacteria|p__Firmicutes|c__Clostridia|o__Clostridiales|f__Clostridiales_Family_XI_Incertae_Sedis|g__Clostridiales_Family_XI_Incertae_Sedis_noname	0	0	0	0	0	0	0	0	0	0	0	0	0	0	0	0	0	0	0	0	0	0	0	0	0	0	0	0	0	0	0	0	0	0	0	0	0	0	0	0	0	0	0	0	0	0	0	0	0
k__Bacteria|p__Firmicutes|c__Clostridia|o__Clostridiales|f__Clostridiales_Family_XI_Incertae_Sedis|g__Finegoldia	0	0	0	0	0	0	0	0	0	0	0	0	0	0	0	0	0	0	0	0	0	0	0	0	0	0	0	0	0	0	0	0	0	0	0	0	0	0	0	0	0	0	0	0	0	0	0	0	0
k__Bacteria|p__Firmicutes|c__Clostridia|o__Clostridiales|f__Clostridiales_Family_XI_Incertae_Sedis|g__Parvimonas	0	0.110281	0	0	0	0	0	0	0	0	0	0	0	0	0	0.00343004	0	0	0	0.000713944	0	0	0	0	0	0	0	0	0	0	0	0	0	0	0	0	0	0	0	0	0	0	0	0	0	0	0	0	0
k__Bacteria|p__Firmicutes|c__Clostridia|o__Clostridiales|f__Clostridiales_Family_XI_Incertae_Sedis|g__Peptoniphilus	0	0.00863936	0	0	0	0	0	0	0	0	0	0	0	0	0	0	0	0	0	0	0	0	0	0	0	0	0	0	0	0	0	0	0	0	0	0	0	0	0	0	0	0	0	0	0	0	0	0	0
k__Bacteria|p__Firmicutes|c__Clostridia|o__Clostridiales|f__Clostridiales_noname|g__Clostridiales_noname	0.00107066	0	0	0	0.00229314	0	0	0	0	0	0.01869	0	0	0	0	0	0.00122	0	0	0	0	0	0	0	0.00187	0.00172	0	0	0	0	0.00021	0	0	0	0	0	0	0.00384	0	0	0	0.02678	0.00169011	0.00371	0.0687478	0	0.00413	0	0.00997
k__Bacteria|p__Firmicutes|c__Clostridia|o__Clostridiales|f__Clostridiales_noname|g__Flavonifractor	0.0249454	0	0	0	0	0.01904	0	0.016122	0	0	0.03717	0.00326	0	0.000270001	0.00298	0.00145002	0.16216	0.00285	0	0	0	0	0	0.00568183	0	0.05673	0.00769	0	0.0099437	0.04072	0.00694	0.00290831	0	0.055915	0	0	0.00353	0	0.05913	0	0	0.10681	0.108677	0.37864	0.0485941	0.02846	0.07795	0.00415	0.03731
k__Bacteria|p__Firmicutes|c__Clostridia|o__Clostridiales|f__Clostridiales_noname|g__Pseudoflavonifractor	0	0	0	0	0	0	0	0	0	0	0	0	0	0	0	0	0	0	0	0	0	0	0	0	0	0	0	0	0	0	0	0.0101791	0	0	0	0	0	0	0	0	0	0	0.00229015	0	0	0	0	0.00085	0
k__Bacteria|p__Firmicutes|c__Clostridia|o__Clostridiales|f__Eubacteriaceae|g__Anaerofustis	0	0	0	0	0	0	0	0	0	0	0	0	0	0	0	0	0	0	0	0	0	0	0	0	0	0	0	0	0	0	0	0	0	0	0	0	0	0	0	0	0	0	0	0	0	0	0	0	0
k__Bacteria|p__Firmicutes|c__Clostridia|o__Clostridiales|f__Eubacteriaceae|g__Eubacterium	1.25338	5.8521	38.3484	36.645	5.96617	0.93827	6.37965	5.98135	2.99452	1.97337	4.03672	10.8739	0.148608	6.69814	0.18574	3.2524	0.01486	11.7317	0.37837	16.7029	26.5109	13.8157	9.81948	0.719872	15.2948	12.9749	5.4801	20.3565	0.754679	0.05642	0.25681	2.72517	0	4.65326	0.81212	2.35334	0.00407	0	0.89173	0	5.2029	0.04723	0.0599639	0.51162	5.83369	0.30609	0.48234	0.18211	0.94107
k__Bacteria|p__Firmicutes|c__Clostridia|o__Clostridiales|f__Lachnospiraceae|g__Anaerostipes	0	0.0177969	0.0227806	0.00564067	0.0174038	0.01286	0	0.000660082	0	0	0.01831	0	0.0729585	0	0.00604	0	0	0	0	0	0	0	0	0	0.00254	0.00054	0.06636	0	0.00260621	0.01728	0.0033	0	0	0.0091705	0	0.00399	0	0	0	0	0.0642545	0.06888	0	0.01214	0	0	0.09871	0	0
k__Bacteria|p__Firmicutes|c__Clostridia|o__Clostridiales|f__Lachnospiraceae|g__Blautia	2.5383	0.964192	0.720018	0.635714	1.56599	4.17632	0.38896	2.44704	0.26872	1.3909	1.611	1.763	1.30084	0.707263	1.13065	0.323864	1.13581	0.42895	0.16169	0.961735	4.63082	0.27002	0.184485	0.366748	0.63189	0.16389	1.23954	0.619149	0.555845	9.29352	0.52845	3.1565	0	0.804629	0.74497	0.11874	1.32884	0	0.94558	1.55365	0.182591	2.80652	12.1027	7.31341	0.406959	2.96644	23.01	7.59488	2.39206
k__Bacteria|p__Firmicutes|c__Clostridia|o__Clostridiales|f__Lachnospiraceae|g__Butyrivibrio	0	0	0	0	0	0	0	0	0	0	0	0	0	0	0	0	0	0	0	0	0	0	0	0	0	0	0	0	0	0	0	0	0	0	0	0	0	0	0	0	0	0	0	0	0	0	0	0	0
k__Bacteria|p__Firmicutes|c__Clostridia|o__Clostridiales|f__Lachnospiraceae|g__Coprococcus	0.143658	2.37424	0.702718	1.2544	2.13156	0.01124	1.9038	1.82582	0.38117	1.8537	0.31138	1.7108	0.0591932	1.18262	30.5693	0.113821	0.8334	9.20334	0.66989	7.79484	2.66164	1.80069	0.284428	0.103823	0.28124	6.09642	0	1.03491	0.111636	0	0.82961	0.470575	0	0.225524	0.30236	0.16118	0.06147	0	0.2389	0	2.8495	0.5914	0	0	2.11417	0.14775	0.51183	0	1.80618
k__Bacteria|p__Firmicutes|c__Clostridia|o__Clostridiales|f__Lachnospiraceae|g__Dorea	0.382816	0.890679	0.372199	0.648063	0.116059	0.00539	0.10926	0.352444	0.79579	0.12946	0.55169	0.56033	1.28574	0.179761	0.27843	0.0725908	0.11053	0.12859	0.13968	0.195331	1.12535	0.09395	0.141879	0.254082	0.06716	0.06554	0.34758	0.269483	0.191777	0.25824	0.21884	0.690008	0	0.571848	0.15376	0.0247	0.00732	0	0.09672	0	0.0721663	0.38667	0	0	0.259655	0.10932	0.98478	0	0.23817
k__Bacteria|p__Firmicutes|c__Clostridia|o__Clostridiales|f__Lachnospiraceae|g__Lachnospiraceae_noname	0.294061	1.17433	0.574644	1.98684	0.180207	0.14951	2.19401	2.24991	0.01167	0.12589	1.69097	0.1938	0.0569762	0.161681	1.26618	0.215583	0.41427	0.44544	0.01044	2.3198	0.14934	0.43745	0	0.941293	0.27298	0.42168	0.48659	0.329114	1.48884	0.42817	0.16376	0.262891	0	0.0931282	0.26247	0.04485	0.3222	0.99789	0.42386	0.00582	0	0.26932	0.736777	0.73679	0.537294	0.0979	0.89584	0.38858	0.58176
k__Bacteria|p__Firmicutes|c__Clostridia|o__Clostridiales|f__Lachnospiraceae|g__Oribacterium	0	0	0	0	0.0451518	0	0	0	0	0	0	0	0.00177358	0.0492502	0	0	0	0	0	0	0	0	0	0	0	0	0	0	0	0	0	0	0	0	0.01168	0	0	0	0	0	0	0	0	0	0	0	0	0	0
k__Bacteria|p__Firmicutes|c__Clostridia|o__Clostridiales|f__Lachnospiraceae|g__Roseburia	1.03095	1.88381	5.6831	2.03588	24.3778	0.73366	4.64547	0.539447	1.43794	0.65248	1.99802	1.4626	10.3436	3.22263	2.1036	0.980881	11.3872	3.98343	0.10691	4.39142	6.58366	2.3205	0.964784	29.0473	1.60447	1.1158	31.2041	7.96153	28.2466	9.86752	7.04242	2.5794	0	0.0492	3.11705	1.32586	0.11256	0	1.67378	0.00012	0	0.42279	0	1.84372	1.10352	0	0.14745	0	5.99505
k__Bacteria|p__Firmicutes|c__Clostridia|o__Clostridiales|f__Lachnospiraceae|g__Stomatobaculum	0	0	0	0.00184329	0.100858	0	0	0	0	0	0	0	0	0.0152101	0	0	0	0	0	0	0	0	0	0	0	0	0.00298	0	0	0	0	0	0	0	0	0	0	0	0	0	0	0	0	0	0	0	0	0	0
k__Bacteria|p__Firmicutes|c__Clostridia|o__Clostridiales|f__Oscillospiraceae|g__Oscillibacter	0.52061	0.422504	0.204535	0.0390012	0.128286	0.00618	0.15859	0.367186	0.03691	0.00387	1.69795	0.17779	0.044934	0.132331	0.24346	0	0.0009	0.02031	0.00819	0.186753	0.00857	0.02116	0.00187117	0.224802	0.09218	1.33012	0.06576	0.0518695	0.173223	0.01988	0.91564	0.153164	0	0	0.087	0.13119	0.13366	0	0.21183	0	0.000600135	0	3.77661	9.19906	0.0109846	0.29255	0	0	0.31536
k__Bacteria|p__Firmicutes|c__Clostridia|o__Clostridiales|f__Peptostreptococcaceae|g__Peptostreptococcaceae_noname	0.0135283	0.00270707	0.0169104	0.27882	0	0.0002	0.048	0	0	0.59594	0	0.02355	0.0517461	0	0.01585	0.00807009	0.01528	0	0	0.0669969	0.34839	0	0.106146	0.109415	0	0	0.03663	0.0249983	0.153366	0	0.01046	0.00963898	0.23483	0	0	0.02439	0.02198	0.04973	0.47266	0.12593	0	0.01144	0.280668	0.01988	0	0.00406	0	0	0
k__Bacteria|p__Firmicutes|c__Clostridia|o__Clostridiales|f__Peptostreptococcaceae|g__Peptostreptococcus	0	0.0066725	0	0	0.0104543	0	0	0	0	0	0	0	0	0.00192001	0	0	0	0	0	0	0	0	0	0	0	0	0	0	0	0	0	0	0	0	0	0	0	0	0	0	0	0	0	0	0	0	0	0	0
k__Bacteria|p__Firmicutes|c__Clostridia|o__Clostridiales|f__Ruminococcaceae|g__Anaerotruncus	0.0111769	0	0	0	0	0	0	0.0206026	0	0	0.07427	0.03937	0	0.000800003	0.02624	0	0	0	0	0.0138754	0.01196	0.0163	0	0	0	0.08554	0.0037	0	0	0	0.00776	0.0206802	0	0	0.00851	0	0	0	0.00091	0	0	0.04201	0.0139209	0.68875	0.017689	0	0	0	0.08962
k__Bacteria|p__Firmicutes|c__Clostridia|o__Clostridiales|f__Ruminococcaceae|g__Faecalibacterium	8.77381	13.6623	6.0909	3.61709	10.0563	0.90662	2.10051	3.3817	4.02072	2.46304	7.0509	3.83151	1.59763	5.11675	3.03914	0.422975	11.3359	3.06704	2.21366	7.14503	9.79342	5.5796	1.59373	5.09967	4.06799	13.7731	6.14761	6.87073	5.2048	0.55658	9.17189	7.27638	10.2643	4.01978	5.17462	2.95171	2.89903	0	12.738	2.05227	11.8107	5.84172	10.0759	1.68261	0.0177296	0.20265	2.31862	14.3747	1.57762
k__Bacteria|p__Firmicutes|c__Clostridia|o__Clostridiales|f__Ruminococcaceae|g__Ruminococcaceae_noname	0	0	0	0	0	0.08937	0	0.00186023	0	0	0.18745	0	0	0	0	0	0	0	0	0	0	0	0	0	0	0	0.02859	0	0	0	0	0	0	0	0	0	0	0	0	0	0	0	0.0120208	0.00208	0	0	0	0	0
k__Bacteria|p__Firmicutes|c__Clostridia|o__Clostridiales|f__Ruminococcaceae|g__Ruminococcus	22.4428	1.93646	2.29722	0.9486	2.7269	0	3.63711	2.88194	0.04545	0	0.79828	2.12573	0.591025	3.42031	1.5876	0	0	0.48015	0.0012	4.27371	0.76635	1.24768	0.504416	0.00298096	1.65728	0.13396	2.12108	0.0321693	0.00524249	0	0.25867	1.20448	0	2.82943	1.54579	0.0033	0.91605	0	0.6373	0	0	0	0	4.87896	0.443149	1.00878	0	0	0.46528
k__Bacteria|p__Firmicutes|c__Clostridia|o__Clostridiales|f__Ruminococcaceae|g__Subdoligranulum	1.25072	3.91245	7.75984	1.06699	0.623354	0.42152	6.30768	1.58368	1.50418	0.03551	2.21091	1.2021	0.27298	0.873153	2.69456	0.489076	1.17574	1.99984	0.23395	5.4016	1.38396	2.52894	0.824506	0.83759	1.20602	4.06904	0.6753	1.94732	0.600451	0.02654	23.487	25.4986	0.01671	1.96308	4.51853	4.902	0.11567	0.0057	0.36058	0.17283	0.00231052	11.9954	1.03393	1.94425	3.32437	0.60247	1.36975	0	3.28929
k__Bacteria|p__Firmicutes|c__Erysipelotrichia|o__Erysipelotrichales|f__Erysipelotrichaceae|g__Bulleidia	0	0	0	0	0	0	0	0	0	0	0	0	0	0	0	0	0	0	0	0	0	0	0	0	0	0	0	0	0	0	0	0	0	0	0	0	0	0	0	0.00038	0	0	0	0	0	0	0	0	0
k__Bacteria|p__Firmicutes|c__Erysipelotrichia|o__Erysipelotrichales|f__Erysipelotrichaceae|g__Catenibacterium	0	0	0.120073	0	0	0	0	0	0	0	0	0	0	0	0	0	0	0	0	0	0	0	0.224881	0	0	0	0	0	0	0	0	0.232592	0	0.0820033	0	0	0	0	0	0	0	0	0	0	0	0	0	0	0
k__Bacteria|p__Firmicutes|c__Erysipelotrichia|o__Erysipelotrichales|f__Erysipelotrichaceae|g__Coprobacillus	0.00918565	0	0	0	0	0.0484	0	0	0	0	0	0	0	0	0	0	0	0	0.00405	0	0	0	0	0	0	0	0	0	0	0.01612	0	0	4.95503	0.037103	0	0	0	0.29267	0.01811	0.40956	0.0414794	0.12989	0	0.0134	0	0.00068	0	0.85971	0
k__Bacteria|p__Firmicutes|c__Erysipelotrichia|o__Erysipelotrichales|f__Erysipelotrichaceae|g__Erysipelotrichaceae_noname	0.00502309	6.63942	0	0.238198	0.0281485	0.01013	0	2.13422	0	0.03532	0	0.021	0.00215651	0.269621	0	0	0.01636	0	0	0	0	0	0.542019	0	0	0	0	0	0	0.00537	0	0.226828	2.07322	0.546141	0.21706	0	0	0.18494	0.00102	0.47676	0.0478508	0.03532	0.105047	0.0701	0	1.36568	0.00521	1.4036	0
k__Bacteria|p__Firmicutes|c__Erysipelotrichia|o__Erysipelotrichales|f__Erysipelotrichaceae|g__Holdemania	0.000790487	0.0393582	0.00846021	0.0022462	0.00232318	0.04671	0.01889	0.0356744	0.00031	0.00694	0.12431	0.00233	0	0.0125001	0.03936	0	0.13272	0.01169	0.02333	0.0656001	0	0.00481	0	0	0.01404	0.10008	0.00658	0.0203412	0.00137327	0.00938	0.0659	0.071503	0	0.104724	0.00052	0.00745	0	0	0.02097	0	0	0	0	0	0.150661	0.06249	0	0	0.07292
k__Bacteria|p__Firmicutes|c__Erysipelotrichia|o__Erysipelotrichales|f__Erysipelotrichaceae|g__Solobacterium	0	0.00854419	0	0.00166198	0.0481059	0	0	0.00146018	0	0	0	0.01867	0	0.0253001	0.00062	0.0088201	0	0	0	0	0	0.00283	0.000890557	0	0	0	0.00548	0.00143219	0.00207495	0.01178	0	0.00266942	0.01762	0	0.00126	0	0	0	0.00034	0.00779	0	0	0	0	0	0.00437	0	0	0
k__Bacteria|p__Firmicutes|c__Erysipelotrichia|o__Erysipelotrichales|f__Erysipelotrichaceae|g__Turicibacter	0	0	0	0	0	0	0	0	0	0	0	0.00095	0	0	0	0	0	0	0.00145	0	0.05238	0	0	0	0	0	0	0.0942144	0	0	0	0	0	0	0	0	0	0	0	0	0	0	0	0	0	0	0	0	0
k__Bacteria|p__Firmicutes|c__Negativicutes|o__Selenomonadales|f__Acidaminococcaceae|g__Acidaminococcaceae_unclassified	0	0	0	0	0	0	0	0	0	0	0	0	0	0	0	0	0	0	0	0	0	0	0	0	0	0	0	0	0	0	0	0	0	0	0	0	0	0	0	0	0	0	0	0	0	0	0	0	0
k__Bacteria|p__Firmicutes|c__Negativicutes|o__Selenomonadales|f__Acidaminococcaceae|g__Acidaminococcus	0	0	0	0	0	0.00521	0	0.918084	0	0	0	0	0	0	0	0	0	0	0	0	0	0	0	0	0	0	0	0	0	0.0016	0	0	0	0	0	0	0	0	0	0	0	0	0	0	0	0	0	0	0
k__Bacteria|p__Firmicutes|c__Negativicutes|o__Selenomonadales|f__Acidaminococcaceae|g__Phascolarctobacterium	0	0	0	0	0	0	0	0	0	0	4.84476	0	0	0	0	0	0	0	0	0	0	0	0	0	0	0	0	0	0	0	0	5.55937	0	10.158	0	0	0	0	0	0	0	0	0	0	0	0	0	0	0
k__Bacteria|p__Firmicutes|c__Negativicutes|o__Selenomonadales|f__Veillonellaceae|g__Anaeroglobus	0	0	0	0	0	0	0	0	0	0	0	0	0	0	0	0	0	0	0	0	0	0	0	0	0	0	0	0	0	0	0	0	0	0	0	0	0	0	0	0	0	0	0	0	0	0	0	0	0
k__Bacteria|p__Firmicutes|c__Negativicutes|o__Selenomonadales|f__Veillonellaceae|g__Dialister	0	0	0	0	0	0	0	0	4.60061	0	0	0	0	0	0.02836	0.000390005	0	0	0.94849	4.96546	0	7.42907	0	0	0	3.81063	0	0.0695566	0	0	0	0	0	0	0.00133	0	0	0	1.21022	0	0	0	0	0	0.841963	0	0	0	0.00172
k__Bacteria|p__Firmicutes|c__Negativicutes|o__Selenomonadales|f__Veillonellaceae|g__Megamonas	13.2737	0	0.0038201	5.89488	0	0	10.5344	19.7734	5.32287	6.95748	0	16.9728	0.00263013	3.20957	0.00168	22.5857	0	2.9628	0	0	5.11341	0	0.637149	11.0444	22.1421	0	0.00286	2.78447	11.3774	0.00489	0	0	0	0	9.6623	0	29.8595	0	0	33.9542	0	0	0	0	1.55807	0	0	0	0
k__Bacteria|p__Firmicutes|c__Negativicutes|o__Selenomonadales|f__Veillonellaceae|g__Megasphaera	0.981544	0	0.154894	0.186777	0.070807	0.20038	0	0.746023	0	0	0	0	0	0.00494002	0	0	0	0	14.0406	0	0	0	0	0	0	0	0	0	0	0	0	0.362178	0	0	0	0	0.01165	0	0	0.00201	0	0	0	0	0	0	0	1.13226	0
k__Bacteria|p__Firmicutes|c__Negativicutes|o__Selenomonadales|f__Veillonellaceae|g__Mitsuokella	0.00345213	0	0	0	0	0.58611	0.00817	0	0	0	0	0	0	0	0	0	0	0	0	0	0	0	0.00774485	0.419175	0	0	0	0	0.47005	0	0	0	0	0	0	0.79738	0	0	0	0	0	0	0.00611039	0	0	0	0	0	0
k__Bacteria|p__Firmicutes|c__Negativicutes|o__Selenomonadales|f__Veillonellaceae|g__Veillonella	0.0226439	0.0154916	0.0372109	2.8386	3.49038	1.04505	0.02266	0.015982	0.00293	0.01657	0.00658	0.34413	0.892946	1.78412	0.02314	0.0172902	0.13891	0.35262	0.13844	0.196335	0.01979	0.23762	0.116823	0.144877	0.04417	0.42122	1.04633	0.03261	0.162588	0.2136	0.04756	0.00385351	5.93398	0.0136004	2.19178	0.00617	0.00072	0.66592	0.02183	0.01846	3.96994	0.01523	0.0703245	0	0.0627839	0.116	0.04726	0.33698	0.03062
k__Bacteria|p__Fusobacteria|c__Fusobacteriia|o__Fusobacteriales|f__Fusobacteriaceae|g__Fusobacterium	0	0	0	0	0.0404854	0.11958	0	0	0	6.47016	0	0	0	0.00807003	0	0	0	0.05773	0	0	0	0	0	0	0	0	0	0	0	0.12276	0	0.0241598	7.07985	0	0.07848	0	0.22784	0	0	0	0	0	0	0	0	0	0	0	0
k__Bacteria|p__Fusobacteria|c__Fusobacteriia|o__Fusobacteriales|f__Leptotrichiaceae|g__Leptotrichia	0	0	0	0	0.00685939	0	0	0	0	0	0	0	0	0	0	0	0	0	0	0	0	0	0	0	0	0	0	0	0	0	0	0	0	0	0	0	0	0	0	0	0	0	0	0	0	0	0	0	0
k__Bacteria|p__Fusobacteria|c__Fusobacteriia|o__Fusobacteriales|f__Leptotrichiaceae|g__Leptotrichiaceae_unclassified	0	0	0	0	0.0255049	0	0	0	0	0	0	0	0	0	0	0	0	0	0	0	0	0	0	0	0	0	0	0	0	0	0	0	0	0	0	0	0	0	0	0	0	0	0	0	0	0	0	0	0
k__Bacteria|p__Proteobacteria|c__Alphaproteobacteria|o__Caulobacterales|f__Caulobacteraceae|g__Brevundimonas	0	0	0	0	0	0	0	0	0	0	0	0	0	0	0	0	0	0	0	0	0	0	0	0	0	0	0	0	0	0	0	0	0	0	0	0	0	0	0	0	0	0	0	0	0	0	0	0	0
k__Bacteria|p__Proteobacteria|c__Alphaproteobacteria|o__Rhizobiales|f__Brucellaceae|g__Ochrobactrum	0	0	0	0	0	0	0	0	0	0	0	0	0	0	0	0	0	0	0	0	0	0	0	0	0	0	0	0	0	0	0	0	0	0	0	0	0	0	0	0	0	0	0	0	0	0	0	0	0
k__Bacteria|p__Proteobacteria|c__Alphaproteobacteria|o__Rhizobiales|f__Rhizobiaceae|g__Agrobacterium	0	0	0	0	0	0	0	0	0	0	0	0	0	0	0	0	0	0	0	0	0	0	0	0	0	0	0	0	0	0	0	0	0	0	0	0	0	0	0	0	0	0	0	0	0	0	0	0	0
k__Bacteria|p__Proteobacteria|c__Alphaproteobacteria|o__Rhizobiales|f__Rhizobiaceae|g__Shinella	0	0	0	0	0	0	0	0	0	0	0	0	0	0	0	0	0	0	0	0	0	0	0	0	0	0	0	0	0	0	0	0	0	0	0	0	0	0	0	0	0	0	0	0	0	0	0	0	0
k__Bacteria|p__Proteobacteria|c__Alphaproteobacteria|o__Rhizobiales|f__Rhizobiaceae|g__Sinorhizobium	0	0	0	0	0	0	0	0	0	0	0	0	0	0	0	0	0	0	0	0	0	0	0	0	0	0	0	0	0	0	0	0	0	0	0	0	0	0	0	0	0	0	0	0	0	0	0	0	0
k__Bacteria|p__Proteobacteria|c__Alphaproteobacteria|o__Rhodobacterales|f__Rhodobacteraceae|g__Paracoccus	0	0	0	0	0	0	0	0	0	0	0	0	0	0	0	0	0	0	0	0	0	0	0	0	0	0	0	0	0	0	0	0	0	0	0	0	0	0	0	0	0	0	0	0	0	0	0	0	0
k__Bacteria|p__Proteobacteria|c__Alphaproteobacteria|o__Sphingomonadales|f__Sphingomonadaceae|g__Sphingopyxis	0	0	0	0	0	0	0	0	0	0	0	0	0	0	0	0	0	0	0	0	0	0	0	0	0	0	0	0	0	0	0	0	0	0	0	0	0	0	0	0	0	0	0	0	0	0	0	0	0
k__Bacteria|p__Proteobacteria|c__Betaproteobacteria|o__Burkholderiales|f__Alcaligenaceae|g__Achromobacter	0	0	0	0	0	0	0	0	0	0	0	0	0	0	0	0	0	0	0	0	0	0	0	0	0	0	0	0	0	0	0	0	0	0	0	0	0	0	0	0	0	0	0	0	0	0	0	0	0
k__Bacteria|p__Proteobacteria|c__Betaproteobacteria|o__Burkholderiales|f__Alcaligenaceae|g__Alcaligenes	0	0.00565735	0	0.00119864	0.0232518	0	0	0	0	0	0	0.01851	0	0	0	0.00568007	0.0058	0.00078	0	0	0	0.01159	0	0.0134543	0	0	0.02058	0.00218335	0.0170506	0.02085	0.00022	0	0.0004	0	0	0	0	0	0	0.00049	0	0	0	0	0	0	0	0	0
k__Bacteria|p__Proteobacteria|c__Betaproteobacteria|o__Burkholderiales|f__Alcaligenaceae|g__Pusillimonas	0	0	0	0	0	0	0	0	0	0	0	0	0	0	0	0	0	0	0	0	0	0	0	0	0	0	0	0	0	0	0	0	0	0	0	0	0	0	0	0	0	0	0	0	0	0	0	0	0
k__Bacteria|p__Proteobacteria|c__Betaproteobacteria|o__Burkholderiales|f__Burkholderiaceae|g__Lautropia	0	0	0	0	0.0614241	0	0	0	0	0	0	0	0	0	0	0	0	0	0	0	0	0	0	0	0	0	0	0	0	0	0	0	0	0	0	0	0	0	0	0	0	0	0	0	0	0	0	0	0
k__Bacteria|p__Proteobacteria|c__Betaproteobacteria|o__Burkholderiales|f__Burkholderiales_noname|g__Burkholderiales_noname	0	0	0.0191105	0.00019138	0	0.03131	0.03042	0.316149	0.04963	0	0.33126	0.05687	0.78245	0.208391	0.09054	0.207782	0.27098	0.00805	0.00833	0.166318	0	0.00485	0	0.0316302	0.06476	0.23048	0.00462	0.0108566	0.0510116	0.0832	0	0.0873636	0	0.337615	0	0	0	0	0.34046	0	0	0	0.350893	0	0.453362	0.35868	1.51378	0	1.25453
k__Bacteria|p__Proteobacteria|c__Betaproteobacteria|o__Burkholderiales|f__Burkholderiales_noname|g__Thiomonas	0	0	0	0	0	0	0	0	0	0	0	0	0	0	0	0	0	0	0	0	0	0	0	0	0	0	0	0	0	0	0	0	0	0	0	0	0	0	0	0	0	0	0	0	0	0	0	0	0
k__Bacteria|p__Proteobacteria|c__Betaproteobacteria|o__Burkholderiales|f__Comamonadaceae|g__Alicycliphilus	0	0	0	0	0	0	0	0	0	0	0	0	0	0	0	0	0	0	0	0	0	0	0	0	0	0	0	0	0	0	0	0	0	0	0	0	0	0	0	0	0	0	0	0	0	0	0	0	0
k__Bacteria|p__Proteobacteria|c__Betaproteobacteria|o__Burkholderiales|f__Comamonadaceae|g__Comamonas	0	0	0	0	0	0	0	0	0	0	0	0	0	0	0	0	0	0	0	0	0	0	0	0	0	0	0	0	0	0	0	0	0	0	0	0	0	0	0	0	0	0	0	0	0	0	0	0	0
k__Bacteria|p__Proteobacteria|c__Betaproteobacteria|o__Burkholderiales|f__Comamonadaceae|g__Delftia	0	0	0	0	0	0	0	0	0	0	0	0	0	0	0	0	0	0	0	0	0	0	0	0	0	0	0	0	0	0	0	0	0	0	0	0	0	0	0	0	0	0	0	0	0	0	0	0	0
k__Bacteria|p__Proteobacteria|c__Betaproteobacteria|o__Burkholderiales|f__Comamonadaceae|g__Variovorax	0	0	0	0	0	0	0	0	0	0	0	0	0	0	0	0	0	0	0	0	0	0	0	0	0	0	0	0	0	0	0	0	0	0	0	0	0	0	0	0	0	0	0	0	0	0	0	0	0
k__Bacteria|p__Proteobacteria|c__Betaproteobacteria|o__Burkholderiales|f__Oxalobacteraceae|g__Oxalobacter	0	0	0	0	0	0	0	0	0	0	0	0.01353	0	0.00713003	0	0	0	0	0	0	0	0	0	0	0	0	0	0.000821258	0	0	0	0.160591	0	0	0	0	0	0	0	0	0	0	0.00334022	0	0	0	0	0	0
k__Bacteria|p__Proteobacteria|c__Betaproteobacteria|o__Burkholderiales|f__Sutterellaceae|g__Parasutterella	0.0212731	0	0.00347009	0	0.0165827	0.0357	0.03061	0.39931	0.07513	0	0.65927	0.05173	0.659156	0.197051	0.11208	0.389055	0.84347	0.00134	0.02468	0.332201	0	0	0	0.0832368	0.07586	0.90259	0.0079	0.0144221	0.0919993	0.11485	0	0.106174	0	0.00965158	0	0	0	0	0.46252	0	0	0	0.0544835	0	0.323454	0.67836	1.17509	0	1.28351
k__Bacteria|p__Proteobacteria|c__Betaproteobacteria|o__Burkholderiales|f__Sutterellaceae|g__Sutterella	0.623764	0	2.33843	0	3.00225	0	0	0	0	0.21424	0	3.3723	0	0	3.07742	0	0	1.04499	1.02102	0	0	4.80542	1.12632	4.78667	0	0	8.21861	1.01768	5.36424	0	0	0	0	0	0.25385	0.00198	0	0	0	0	0	0	0	0	0	0	0	0	0
k__Bacteria|p__Proteobacteria|c__Betaproteobacteria|o__Burkholderiales|f__Sutterellaceae|g__Sutterellaceae_unclassified	0	0	0	1.02717	0	0	0.41421	0	0	0.54732	0	0	0	0	0	0	0	0	0	0	1.06594	0	0	0	0	0	0	0	0	0	0	0	0	0	0.00657	0.10194	0.11142	0	0	0	0.00825186	0	0	0	0	0	0	0	0
k__Bacteria|p__Proteobacteria|c__Betaproteobacteria|o__Gallionellales|f__Gallionellaceae|g__Gallionellaceae_unclassified	0	0	0	0	0	0	0	0	0	0.0108	0	0	0.0585885	0.00929004	0.00961	0	0	0	0	0	0	0	0	0	0	0.03954	0	0	0	0	0	0	0	0.0166973	0.0099	0	0.00812	0	0	0	0	0.02073	0	0	0	0.06236	0	0	0
k__Bacteria|p__Proteobacteria|c__Betaproteobacteria|o__Neisseriales|f__Neisseriaceae|g__Neisseria	0	0	0	0	0.106125	0	0	0	0	0	0	0	0	0.00628003	0	0	0	0	0.04993	0.0208285	0	0	0	0	0	0	0.00572	0	0	0	0	0	0	0	0	0	0	0	0	0	0	0	0	0	0	0	0	0	0
k__Bacteria|p__Proteobacteria|c__Betaproteobacteria|o__Rhodocyclales|f__Rhodocyclaceae|g__Thauera	0	0	0	0	0	0	0	0	0	0	0	0	0	0	0	0	0	0	0	0	0	0	0	0	0	0	0	0	0	0	0	0	0	0	0	0	0	0	0	0	0	0	0	0	0	0	0	0	0
k__Bacteria|p__Proteobacteria|c__Deltaproteobacteria|o__Desulfovibrionales|f__Desulfovibrionaceae|g__Bilophila	0.3409	0.532351	0.248366	0.0430706	0.0823928	0.10182	0.45835	1.01686	0.12489	0.04406	0.55265	0.46912	0.0446619	0.297341	0.30441	0.0228503	0.42953	0.2118	0	0.562464	0.01261	0.1973	0	0.0263585	0.1549	0	0.0764	0.272988	0.0352741	0.08372	0.51191	0.304272	0	0	0.26636	0.0681	0.10262	0.43596	0	0.00145	0	0.13539	1.05899	3.34672	0.522942	0	0	0	0
k__Bacteria|p__Proteobacteria|c__Deltaproteobacteria|o__Desulfovibrionales|f__Desulfovibrionaceae|g__Desulfovibrio	0.00400246	0.021297	0	0	0.0381823	0	0.06405	0.00256032	0	0	0	0	0	0.0182201	0	0	0	0	0	0.00214183	0	0	0	0	0	0	0	0.0882552	0	0	0	0.378237	0	0.0463937	0.0031	0	0	0	0	0	0	0.10725	0	0	0	0	0	0	0
k__Bacteria|p__Proteobacteria|c__Epsilonproteobacteria|o__Campylobacterales|f__Campylobacteraceae|g__Campylobacter	0	0	0	0	0.0300311	0	0	0	0	0	0.0101	0	0	0.000920004	0	0	0	0	0	0	0	0	0	0	0	0	0	0	0	0	0	0.0186132	0	0	0	0	0	0	0	0	0	0	0	0	0.045247	0	0	0	0
k__Bacteria|p__Proteobacteria|c__Epsilonproteobacteria|o__Campylobacterales|f__Helicobacteraceae|g__Helicobacter	0	0	0	0	0	0	0	0	0	0	0	0	0	0	0	0	0	0	0	0	0	0	0	0	0	0	0	0	0	0	0	0	0	0	0	0	0	0	0	0	0	0	0	0	0	0	0	0	0
k__Bacteria|p__Proteobacteria|c__Gammaproteobacteria|o__Aeromonadales|f__Aeromonadaceae|g__Aeromonas	0	0	0	0	0	0	0	0	0	0	0	0	0	0	0	0	0	0.06114	0	0	0	0	0	0	0	0	0	0	0	0	0	0	0	0	0	0	0	0	0	0	0	0	0	0	0	0	0	0	0
k__Bacteria|p__Proteobacteria|c__Gammaproteobacteria|o__Cardiobacteriales|f__Cardiobacteriaceae|g__Cardiobacteriaceae_unclassified	0	0	0	0	0.00310425	0	0	0	0	0	0	0	0	0	0	0	0	0	0	0	0	0	0	0	0	0	0	0	0	0	0	0	0	0	0	0	0	0	0	0	0	0	0	0	0	0	0	0	0
k__Bacteria|p__Proteobacteria|c__Gammaproteobacteria|o__Cardiobacteriales|f__Cardiobacteriaceae|g__Cardiobacterium	0	0	0	0	0.000420576	0	0	0	0	0	0	0	0	0	0	0	0	0	0	0	0	0	0	0	0	0	0	0	0	0	0	0	0	0	0	0	0	0	0	0	0	0	0	0	0	0	0	0	0
k__Bacteria|p__Proteobacteria|c__Gammaproteobacteria|o__Enterobacteriales|f__Enterobacteriaceae|g__Citrobacter	0	0	0	0.0694911	0	0.1906	0	0	0	0	0	0.00664	0	0.353541	0.66289	0	0.3051	0.30383	0.28076	0.00661174	0	0	0.0155397	0.0145147	0	0.00101	0	0	0.015928	0	0	0	0	0	0	0	0	0	0	0	0	0	0	0	0.00707967	0	0	0.10308	0
k__Bacteria|p__Proteobacteria|c__Gammaproteobacteria|o__Enterobacteriales|f__Enterobacteriaceae|g__Cronobacter	0	0	0	0	0	0	0	0	0	0	0	0	0.0885277	0.203041	0	0	0	0	0	0	0	0	0	0	0	0	0	0	0	0	0	0	0	0	0	0	0	0	0	0	0	0	0	0	0	0	0	0	0
k__Bacteria|p__Proteobacteria|c__Gammaproteobacteria|o__Enterobacteriales|f__Enterobacteriaceae|g__Enterobacter	0.34084	0	0	0.844781	0	0	0	0	0	0	0	0	2.62268	0.198481	0.08245	0	0.74669	0.0653	1.80906	0.22125	0	0	0.0424566	4.72637	0	0.07854	0	0	3.94455	0	0.03992	0	0	0	0.05214	0.03028	0	4.5093	0.01429	0	0	0	0	0	0.839904	0	0	0	0
k__Bacteria|p__Proteobacteria|c__Gammaproteobacteria|o__Enterobacteriales|f__Enterobacteriaceae|g__Escherichia	3.06257	2.65973	0.488822	2.40935	9.19166	22.9327	0.16289	0.815191	6.2083	0.07046	0.60287	2.23582	0.671249	18.8111	0.95822	1.41329	0.75761	9.54709	0.77202	6.73308	0.15257	0.13903	0.249026	1.35359	5.54714	1.99975	0.32332	0.23491	1.31353	0.16382	0.23028	0.477722	0.01263	0	0.27643	0.1318	5.57904	0.70513	0.08467	4.1414	0.419125	4.23108	1.13979	1.57178	0.103649	6.56816	0.01751	4.18386	0.56338
k__Bacteria|p__Proteobacteria|c__Gammaproteobacteria|o__Enterobacteriales|f__Enterobacteriaceae|g__Klebsiella	0.436138	0	0.0187905	11.892	0.508727	0.19309	0	0	0.1941	0	0	2.80822	23.5492	0.719123	0.4202	1.22079	0.10243	4.9724	1.44632	0.308041	0.03533	0	0.267177	11.6275	0	0.03049	0	0	11.1674	0.00918	0.08677	0.0500645	0	0	0.01088	0.14226	0.01217	1.07961	0	0	0	0.01801	0	0	0.303543	0.23731	0	0.13107	9.61493
k__Bacteria|p__Proteobacteria|c__Gammaproteobacteria|o__Enterobacteriales|f__Enterobacteriaceae|g__Morganella	0	0	0	0	0.0641078	0	0	0	0	0	0	0	0	0	0	0	0	0.00522	0	0	0	0	0	0	0	0	0	0	0	0	0	0	0	0	0	0	0	0	0	0	0	0	0	0	0	0	0	0	0
k__Bacteria|p__Proteobacteria|c__Gammaproteobacteria|o__Enterobacteriales|f__Enterobacteriaceae|g__Pantoea	0	0	0	0	0	0	0	0	0	0	0	0	0	0	0	0	0.01079	0	0	0	0	0	0	0	0	0	0	0	0.0103948	0	0	0	0	0	0	0	0	0	0	0.00329	0	0	0	0	0	0	0	0	0
k__Bacteria|p__Proteobacteria|c__Gammaproteobacteria|o__Enterobacteriales|f__Enterobacteriaceae|g__Plesiomonas	0	0	0	0	0	0	0	0	0	0	0	0	0	0	0	0	0	0	0	0	0	0	0	0	0	0	0	0	0	0	0	0	0	0	0	0	0	0	0	0	0	0	0	0	0	0	0	0	0
k__Bacteria|p__Proteobacteria|c__Gammaproteobacteria|o__Enterobacteriales|f__Enterobacteriaceae|g__Proteus	0	0	0	0	0.00788079	0	0	0	0	0	0	0	0	0	0	0	0	0	0	0	0	0	0	0	0	0	0	0	0	0	0	0	0	0	0	0	0	0	0	0	0	0	0	0	0	0	0	0.03567	0
k__Bacteria|p__Proteobacteria|c__Gammaproteobacteria|o__Enterobacteriales|f__Enterobacteriaceae|g__Raoultella	0	0	0	0	0	0	0	0	0	0	0	0	0.0362374	0.0187901	0.08986	0	0.00237	0.05756	0.01347	0	0	0	0	0	0	0	0	0	0.00142339	0	0	0	0	0	0	0	0	0	0	0	0	0	0	0	0	0	0	0	0
k__Bacteria|p__Proteobacteria|c__Gammaproteobacteria|o__Enterobacteriales|f__Enterobacteriaceae|g__Serratia	0	0	0	0	0	0	0	0	0	0	0	0.00267	0	0	0	0	0	0	0	0	0	0	0	0.021697	0	0	0	0	0	0	0	0.0106465	0	0.00122273	0	0	0	0	0	0.00591	0	0	0	0	0	0	0	0	0
k__Bacteria|p__Proteobacteria|c__Gammaproteobacteria|o__Enterobacteriales|f__Enterobacteriaceae|g__Shigella	0	0.00893544	0	0	0	0	0	0	0	0	0	0	0	0	0	0	0	0	0	0	0	0	0	0.0208467	0	0	0	0	0.0134821	0	0	0	0	0	0	0	0	0	0	0	0	0	0	0	0	0	0	0	0
k__Bacteria|p__Proteobacteria|c__Gammaproteobacteria|o__Pasteurellales|f__Pasteurellaceae|g__Actinobacillus	0	0	0.00490012	0	0.00951303	0	0	0	0	0	0	0	0	0	0	0	0	0	0	0	0.011	0	0	0	0	0	0	0	0	0	0	0	0	0	0	0	0	0	0	0	0	0	0	0	0	0	0	0	0
k__Bacteria|p__Proteobacteria|c__Gammaproteobacteria|o__Pasteurellales|f__Pasteurellaceae|g__Aggregatibacter	0	0	0.00537013	0	0.0501787	0	0	0	0	0	0	0	0	0	0	0	0	0	0	0.0143927	0	0	0.0068743	0	0	0.01912	0	0	0	0	0	0	0	0	0.01757	0	0	0.00105	0	0	0	0	0	0	0	0	0	0	0
k__Bacteria|p__Proteobacteria|c__Gammaproteobacteria|o__Pasteurellales|f__Pasteurellaceae|g__Haemophilus	0.233434	0.00682054	0.718568	0.549865	7.17863	0.02625	0	0.00024003	0	0.24213	0.02126	1.05756	0.711457	1.89676	0.03904	0.0793409	0.2424	0.01365	0.86569	1.00752	0.48696	0.04454	0.177861	0.260104	0.07786	0.20337	0.25806	0.00441677	0.273011	0.16281	0.19284	0	0	0	0.79009	0	0	0.0155	0.08723	0	0	0	0	0	0.00399626	0	0	0	0
k__Bacteria|p__Proteobacteria|c__Gammaproteobacteria|o__Pseudomonadales|f__Moraxellaceae|g__Acinetobacter	0	0	0	0	0	0	0	0	0	0	0	0	0	0	0	0	0	0.03903	0	0	0	0	0	0	0	0	0	0	0	0	0	0	0	0	0	0	0	0	0	0	0	0	0	0	0	0	0	0	0
k__Bacteria|p__Proteobacteria|c__Gammaproteobacteria|o__Pseudomonadales|f__Pseudomonadaceae|g__Pseudomonas	0	0	0	0	0	0	0	0	0	0	0	0	0	0	0	0	0	0	0	0	0	0	0	0.0215169	0	0	0	0	0	0	0	0	0	0	0	0	0	0	0	0	0	0	0	0	0	0	0	0	0
k__Bacteria|p__Proteobacteria|c__Gammaproteobacteria|o__Vibrionales|f__Vibrionaceae|g__Vibrio	0	0	0	0	0	0	0	0	0	0	0.00068	0	0	0	0	0	0	0	0	0	0	0	0	0	0	0	0	0	0	0	0	0	0	0	0	0	0	0	0	0	0	0	0	0	0	0	0	0	0
k__Bacteria|p__Synergistetes|c__Synergistia|o__Synergistales|f__Synergistaceae|g__Pyramidobacter	0	0	0	0.00125908	0	0	0	0	0	0	0	0	0	0	0	0	0	0	0	0.00317653	0	0	0	0	0	0	0	0	0	0	0	0	0	0	0.00608	0	0	0	0	0	0	0	0	0	0	0	0	0	0.09221
k__Bacteria|p__Verrucomicrobia|c__Verrucomicrobiae|o__Verrucomicrobiales|f__Verrucomicrobiaceae|g__Akkermansia	0.0212131	0.0116637	1.60337	0	0.0718184	0	0	0.0217227	0	0	0	0	0	0	0.38889	0	0	0	0	0	0	0.48531	0	0.00313101	0.00393	4.41805	0.0183	0.00759163	0.0029771	0	1.12935	0	0	0	0	0	0.13728	0	0	0	0.0159036	0	0	0	0	0	0	0	0
[truncated: 12 more columns]

## Sheet: Table S4
Table S4 Relative abundance profile at the species level of 91 samples
Species	H01	H02	H03	H04	H05	H06	H07	H08	H09	H10	H11	H12	H13	H14	H15	H16	H17	H18	H19	H20	H21	H22	H23	H24	H25	H26	H27	H28	H30	H31	H32	P02	P03	P05	P13	P14	P15	P20	P21	P22	P25	P27	P29	P30	P31	P32	P33	P34	P35
k__Bacteria|p__Actinobacteria|c__Actinobacteria|o__Actinomycetales|f__Actinomycetaceae|g__Actinomyces|s__Actinomyces_graevenitzii	0	0	0	0.0274177	0.0311426	0	0	0	0	0	0	0	0	0.00416002	0	0	0	0	0	0	0	0	0	0.000350113	0	0	0.00409	0	0	0.00384	0	0	0.00593	0	0	0.00113	0	0	0	0.03952	0	0.0244	0	0	0	0	0	0.00821	0
k__Bacteria|p__Actinobacteria|c__Actinobacteria|o__Actinomycetales|f__Actinomycetaceae|g__Actinomyces|s__Actinomyces_odontolyticus	0	0	0	0.00245772	0.00817119	0	0	0	0	0	0	0	0	0.000500002	0	0	0	0	0	0	0	0	0	0	0	0	0.00524	0	0	0	0	0	0	0	0	0	0	0	0	0.00433	0	0	0	0	0	0	0	0	0
k__Bacteria|p__Actinobacteria|c__Actinobacteria|o__Actinomycetales|f__Actinomycetaceae|g__Actinomyces|s__Actinomyces_oris	0	0	0	0	0	0	0	0	0	0	0	0	0	0	0	0	0	0	0	0	0	0	0	0	0	0	0	0	0	0	0	0	0	0	0	0	0	0	0	0	0	0	0	0	0	0	0	0	0
k__Bacteria|p__Actinobacteria|c__Actinobacteria|o__Actinomycetales|f__Actinomycetaceae|g__Actinomyces|s__Actinomyces_sp_ICM47	0	0	0	0	0	0	0	0	0	0	0	0	0	0	0	0	0	0	0	0	0	0	0	0	0	0	0	0	0	0	0	0	0	0	0	0	0	0	0	0	0	0	0	0	0	0	0	0	0
k__Bacteria|p__Actinobacteria|c__Actinobacteria|o__Actinomycetales|f__Actinomycetaceae|g__Actinomyces|s__Actinomyces_turicensis	0	0	0	0	0	0	0	0	0	0	0	0	0	0	0	0	0	0	0	0.00097262	0	0	0	0	0	0	0	0	0	0	0	0	0	0	0	0	0	0	0	0	0	0	0	0	0	0	0	0	0
k__Bacteria|p__Actinobacteria|c__Actinobacteria|o__Actinomycetales|f__Actinomycetaceae|g__Actinomyces|s__Actinomyces_viscosus	0	0	0	0	0	0	0	0	0	0	0	0	0	0	0	0	0	0	0	0	0	0	0	0	0	0	0.00123	0	0	0	0	0	0	0	0	0	0	0	0	0.00035	0.000700158	0	0	0	0	0	0	0	0
k__Bacteria|p__Actinobacteria|c__Actinobacteria|o__Actinomycetales|f__Dermabacteraceae|g__Brachybacterium|s__Brachybacterium_unclassified	0	0	0	0	0	0	0	0	0	0	0	0	0	0	0	0	0	0	0	0	0	0	0	0	0	0	0	0	0	0	0	0	0	0	0	0	0	0	0	0	0	0	0	0	0	0	0	0	0
k__Bacteria|p__Actinobacteria|c__Actinobacteria|o__Actinomycetales|f__Microbacteriaceae|g__Clavibacter|s__Clavibacter_michiganensis	0	0	0	0	0	0	0	0	0	0	0	0	0	0	0	0	0	0	0	0	0	0	0	0	0	0	0	0	0	0	0	0	0	0	0	0	0	0	0	0	0	0	0	0	0	0	0	0	0
k__Bacteria|p__Actinobacteria|c__Actinobacteria|o__Actinomycetales|f__Micrococcaceae|g__Kocuria|s__Kocuria_rhizophila	0	0	0	0	0	0	0	0	0	0	0	0	0	0	0	0	0	0	0	0	0	0	0	0	0	0	0	0	0	0	0	0	0	0	0	0	0	0	0	0	0	0	0	0	0	0	0	0	0
k__Bacteria|p__Actinobacteria|c__Actinobacteria|o__Actinomycetales|f__Micrococcaceae|g__Kocuria|s__Kocuria_unclassified	0	0	0	0	0	0	0	0	0	0	0	0	0	0	0	0	0	0	0	0	0	0	0	0	0	0	0	0	0	0	0	0	0	0	0	0	0	0	0	0	0	0	0	0	0	0	0	0	0
k__Bacteria|p__Actinobacteria|c__Actinobacteria|o__Actinomycetales|f__Micrococcaceae|g__Rothia|s__Rothia_aeria	0	0	0	0.00556009	0.0433093	0	0	0	0	0	0	0	0	0	0	0	0	0	0	0	0	0	0	0.00685221	0	0	0	0	0	0	0.00211	0	0	0	0	0	0	0	0	0.0001	0	0	0	0	0	0	0	0	0
k__Bacteria|p__Actinobacteria|c__Actinobacteria|o__Actinomycetales|f__Micrococcaceae|g__Rothia|s__Rothia_dentocariosa	0	0	0	0.000171235	0.00150206	0	0	0	0	0	0	0	0	0	0	0	0	0	0	0	0	0	0	0	0	0	0.01491	0	0	0.0066	0	0	0	0	0	0	0	0	0	0	0	0	0	0	0	0	0	0	0
k__Bacteria|p__Actinobacteria|c__Actinobacteria|o__Actinomycetales|f__Micrococcaceae|g__Rothia|s__Rothia_mucilaginosa	0	0	0.0143804	0.0864534	0.280364	0	0.00437	0	0	0.01462	0	0.00585	0.0082028	0.0795803	0.00337	0.00127001	0	0	0.00335	0.0184073	0.00718	0	0	0.0615998	0	0.01234	0.1112	0.00411631	0.00576374	0.07527	0.02274	0	0.02032	0	0.00201	0	0	0	0	0.00628	0	0.00532	0	0	0	0	0.00024	0	0.00465
k__Bacteria|p__Actinobacteria|c__Actinobacteria|o__Actinomycetales|f__Micrococcaceae|g__Rothia|s__Rothia_unclassified	0	0	0	0	0	0	0	0	0	0	0	0	0	0	0	0	0	0	0	0	0	0	0	0	0	0	0	0	0	0	0	0	0	0	0.00275	0	0	0	0	0.00117	0	0	0	0	0	0	0	0	0
k__Bacteria|p__Actinobacteria|c__Actinobacteria|o__Actinomycetales|f__Mycobacteriaceae|g__Mycobacterium|s__Mycobacterium_orygis	0	0	0	0	0	0	0	0	0	0	0	0	0	0	0	0	0	0	0	0	0	0	0	0	0	0	0	0.00271416	0	0	0	0	0	0	0	0	0	0	0	0	0	0	0	0	0	0	0	0	0
k__Bacteria|p__Actinobacteria|c__Actinobacteria|o__Actinomycetales|f__Mycobacteriaceae|g__Mycobacterium|s__Mycobacterium_tuberculosis_bovis_africanum_canetti	0	0	0	0	0	0	0	0	0	0	0	0	0	0	0	0	0	0	0	0	0	0	0	0	0	0	0	0.00183281	0	0	0	0	0	0	0	0	0	0	0	0	0	0	0	0	0	0	0	0	0
k__Bacteria|p__Actinobacteria|c__Actinobacteria|o__Actinomycetales|f__Propionibacteriaceae|g__Propionibacterium|s__Propionibacterium_acnes	0	0	0	0	0	0	0	0	0	0	0	0	0	0	0	0	0	0	0	0	0.01219	0	0	0	0	0	0	0	0	0	0	0	0	0	0	0	0	0	0	0	0	0	0	0	0	0	0	0	0
k__Bacteria|p__Actinobacteria|c__Actinobacteria|o__Actinomycetales|f__Propionibacteriaceae|g__Propionibacterium|s__Propionibacterium_propionicum	0	0	0	0	0	0	0	0	0	0	0	0	0	0	0	0	0	0	0	0	0	0	0	0.00184059	0	0	0	0	0	0	0	0	0	0	0	0	0	0	0	0	0	0	0	0	0	0	0	0	0
k__Bacteria|p__Actinobacteria|c__Actinobacteria|o__Bifidobacteriales|f__Bifidobacteriaceae|g__Bifidobacterium|s__Bifidobacterium_adolescentis	0.0412054	0	0.642306	0	1.72693	0	0	0.693226	0.76086	0	0	0.80221	3.19496	0.311731	1.52268	0	0.06065	0	18.4875	0	0	0	0.905677	2.97047	0.87946	1.08585	4.07974	0.570094	3.56829	0	0	0	0	0	0	0	0	0	0	0	18.8802	0	0	0	0	3.49318	0	0	0
k__Bacteria|p__Actinobacteria|c__Actinobacteria|o__Bifidobacteriales|f__Bifidobacteriaceae|g__Bifidobacterium|s__Bifidobacterium_animalis	0	0	0	0	0	0	0	0	0	0	0	0	0	0	0	0	0	0	0	0	0	0	0	0	0	0	0	0	0	0.00699	0	0	0	0	0	0	0	0	0	0	0	0	0	0	0	0	0	0	0
k__Bacteria|p__Actinobacteria|c__Actinobacteria|o__Bifidobacteriales|f__Bifidobacteriaceae|g__Bifidobacterium|s__Bifidobacterium_bifidum	0	0	0.211805	0	0	0	0	0	0.85458	0	0	0.4848	0	0	0	0	0	0	1.86374	0	0	0	0	0.43389	0.01661	0.89644	0	0.00355545	0.464176	0	0	0.236477	0	0	0	0.0061	0	0	0	0	0	0	0	0	0.0827347	0	0	0	0
k__Bacteria|p__Actinobacteria|c__Actinobacteria|o__Bifidobacteriales|f__Bifidobacteriaceae|g__Bifidobacterium|s__Bifidobacterium_breve	0	0	0	0	0	0	0	0	0	0	0	0	0	0	0	0	0	0	0	0	0	0	0	0	0	0	0	0	0	0	0	0	0	0	0	0	0	0	0	0	0	0	0	0	0	0	0	0	0
k__Bacteria|p__Actinobacteria|c__Actinobacteria|o__Bifidobacteriales|f__Bifidobacteriaceae|g__Bifidobacterium|s__Bifidobacterium_catenulatum	0.00138085	0.0124144	0.000680017	0	0	0	0	0	0	0	0	0	0	0	0	0	0	0	0	0	0	0	0	0	0	0	0	0	0	0.06161	0	0	0	0	0	0	0	0	0	0	0	0	0	0	0	0	0	0	0
k__Bacteria|p__Actinobacteria|c__Actinobacteria|o__Bifidobacteriales|f__Bifidobacteriaceae|g__Bifidobacterium|s__Bifidobacterium_dentium	0	0	0	0	0	0	0	0	0	0	0	0	0	0.0189501	0	0	0	0	0.09951	0.00201767	0	0	0	0	0	0	0	0	0	0	0	0	0	0	0	0	0	0	0	0	0	0	0	0	0	0	0	0.81253	0
k__Bacteria|p__Actinobacteria|c__Actinobacteria|o__Bifidobacteriales|f__Bifidobacteriaceae|g__Bifidobacterium|s__Bifidobacterium_longum	1.06645	6.92175	0.316608	0.71701	6.12194	0.202	0	0.23972	0.37083	0.04034	0.03789	1.0928	2.51979	0.222051	0.42639	0.0118101	0.74918	0	1.77724	0.568248	2.30724	0.99351	0.249486	2.95065	0.26896	3.02369	5.31607	0.654423	3.53138	2.60505	0.38363	0.114858	0	0	0.19908	0.01149	0.0803	0	0.2906	52.3869	10.5794	0	0	2.48349	0.220088	1.54532	0.0263	0	0
k__Bacteria|p__Actinobacteria|c__Actinobacteria|o__Bifidobacteriales|f__Bifidobacteriaceae|g__Bifidobacterium|s__Bifidobacterium_pseudocatenulatum	1.36961	6.53163	0.133703	0.246306	0.429248	0.30262	0	0.088501	0.07684	0	0	0.03347	0	0.0148001	0.08344	0.0088301	0.69959	0	0.19718	0.256875	0.94524	0.51305	0	0.21871	0.05882	0	0.94246	0.126704	0.214491	1.16832	0.42893	0	0	0	0.01869	0	0	0	0	0.58639	0	2.57665	0	2.29555	0.0363112	0.1081	0.01082	0	0
k__Bacteria|p__Actinobacteria|c__Actinobacteria|o__Bifidobacteriales|f__Bifidobacteriaceae|g__Gardnerella|s__Gardnerella_vaginalis	0	0	0	0	0	0	0	0	0	0	0.00232	0	0	0	0	0	0	0	0	0	0	0	0	0	0	0	0	0	0	0	0	0	0	0.0221896	0	0	0	0	0	0	0	0	0	0	0	0	0	0	0
k__Bacteria|p__Actinobacteria|c__Actinobacteria|o__Bifidobacteriales|f__Bifidobacteriaceae|g__Parascardovia|s__Parascardovia_denticolens	0	0	0	0	0	0	0	0	0	0	0	0	0	0	0	0	0	0	0	0	0	0	0	0	0	0	0	0	0	0	0	0	0	0	0	0	0	0	0	0	0.00366083	0	0	0	0	0	0	0	0
k__Bacteria|p__Actinobacteria|c__Actinobacteria|o__Bifidobacteriales|f__Bifidobacteriaceae|g__Scardovia|s__Scardovia_unclassified	0	0	0	0	0	0	0	0	0	0	0	0	0	0	0	0	0	0	0	0	0	0	0	0	0	0	0	0	0	0	0	0	0	0	0	0.00351	0	0	0	0	0	0	0.0130908	0	0	0	0	0	0
k__Bacteria|p__Actinobacteria|c__Actinobacteria|o__Bifidobacteriales|f__Bifidobacteriaceae|g__Scardovia|s__Scardovia_wiggsiae	0	0	0	0	0	0	0	0	0	0	0	0	0	0	0.00019	0	0	0	0	0	0	0	0	0	0	0	0	0	0	0.0051	0	0	0.17716	0	0	0	0	0	0	0	0	0.01764	0.0244916	0	0	0	0	0.04747	0.02402
k__Bacteria|p__Actinobacteria|c__Actinobacteria|o__Coriobacteriales|f__Coriobacteriaceae|g__Adlercreutzia|s__Adlercreutzia_equolifaciens	0.00890548	0.0757345	0.0340009	0	0	0	0	0.00659082	0	0	0.02426	0.02255	0	0	0.0145	0	0.07046	0.01632	0	0.0606439	0	0.04089	0.000970607	0	0.03591	0.2367	0	0.000991519	0	0	0	0	0	0	0	0	0	0	0	0	0	0	0	0	0	0.00596	0	0	0.00451
k__Bacteria|p__Actinobacteria|c__Actinobacteria|o__Coriobacteriales|f__Coriobacteriaceae|g__Atopobium|s__Atopobium_parvulum	0	0.0010786	0	0.00494566	0.0213392	0	0	0	0	0	0	0.00146	0	0.00594002	0.00092	0	0	0	0	0	0	0	0	0	0	0	0.01348	0	0	0.01055	0	0	0	0	0	0	0	0	0	0.01443	0	0	0	0	0	0	0	0	0
k__Bacteria|p__Actinobacteria|c__Actinobacteria|o__Coriobacteriales|f__Coriobacteriaceae|g__Collinsella|s__Collinsella_aerofaciens	0.230242	0.162414	0.106193	0.194361	0	0	0.04319	0.180282	0.25459	0.13923	0.09338	1.12195	1.37062	0.501402	0.19231	0	0	0.15137	1.42561	0	1.72647	0.40629	0.209691	0.451045	0.1151	0	5.06123	0.134817	0.504132	0.44985	0	0.218861	0	0.267909	0.08961	0	0.08242	0	0	0	0	0.10372	0	1.33802	0.375009	0	0.05447	0	0.0388
k__Bacteria|p__Actinobacteria|c__Actinobacteria|o__Coriobacteriales|f__Coriobacteriaceae|g__Collinsella|s__Collinsella_intestinalis	0	0	0	0	0	0	0	0.273744	0	0.25445	0	0	0	0	0	0.128552	0	0	0	0	0	0	0	0	0	0	0	0	0	0	0	0	0	0	0	0	0	0	0	0	0	0	0	0	0	0	0	0	0
k__Bacteria|p__Actinobacteria|c__Actinobacteria|o__Coriobacteriales|f__Coriobacteriaceae|g__Collinsella|s__Collinsella_tanakaei	0	0	0	0	0	0.16964	0	0	0	0	0	0	0	0	0	0	0	0	0	0	0	0	0	0	0	0	0	0	0	0	0	0	0	0	0.033	0	0	0	0	0	0	0	0	0	0	0	0	0	0
k__Bacteria|p__Actinobacteria|c__Actinobacteria|o__Coriobacteriales|f__Coriobacteriaceae|g__Coriobacteriaceae_noname|s__Coriobacteriaceae_bacterium_phI	0	0	0.00319008	0	0	0	0	0	0	0	0	0	0	0	0	0	0	0	0	0	0	0	0	0	0	0	0	0	0	0	0	0	0	0	0	0	0	0	0	0	0	0	0	0.00558	0	0	0	0	0
k__Bacteria|p__Actinobacteria|c__Actinobacteria|o__Coriobacteriales|f__Coriobacteriaceae|g__Cryptobacterium|s__Cryptobacterium_curtum	0	0	0	0	0	0	0	0	0	0	0	0	0	0	0	0	0	0	0	0	0	0	0	0	0	0	0	0	0	0	0	0	0	0	0	0	0	0	0	0.00086	0	0	0	0	0	0	0	0	0
k__Bacteria|p__Actinobacteria|c__Actinobacteria|o__Coriobacteriales|f__Coriobacteriaceae|g__Eggerthella|s__Eggerthella_lenta	0	0	0	0	0	0	0	0	0	0	0	0	0	0	0	0	0.0145	0	0	0	0.0075	0	0	0	0	0.16122	0	0	0	0	0.00019	0	0	0	0	0	0.00017	0	0.00114	0	0	0.00402	0.0235015	0	0	0	0.0526	0	0
k__Bacteria|p__Actinobacteria|c__Actinobacteria|o__Coriobacteriales|f__Coriobacteriaceae|g__Eggerthella|s__Eggerthella_unclassified	0.00387238	0.0423191	0	0	0.00396543	0	0	0	0	0	0.00483	0	0	0	0	0.00335004	0.06416	0	0.00042	0.134522	0.08235	0.01772	0	0	0.01748	0.36665	0	0	0	0	0.25099	0	0	0	0	0.00323	0.03412	0.05547	0.01469	0	0	0.0356	0.496682	0.05436	0	0	0.40654	0	0.00386
k__Bacteria|p__Actinobacteria|c__Actinobacteria|o__Coriobacteriales|f__Coriobacteriaceae|g__Gordonibacter|s__Gordonibacter_pamelaeae	0.0104664	0	0	0	0	0	0	0.0008001	0.00987	0	0	0.01584	0	0	0	0	0	0	0	0.030265	0	0	0	0	0.01121	0.11055	0	0	0	0	0.01744	0	0	0	0	0	0	0	0.00042	0	0	0	0.0103407	0	0.00303269	0	0.03926	0	0
k__Bacteria|p__Actinobacteria|c__Actinobacteria|o__Coriobacteriales|f__Coriobacteriaceae|g__Olsenella|s__Olsenella_unclassified	0	0	0	0	0	0	0	0	0	0	0	0	0	0	0	0	0	0	0.06288	0	0	0	0	0	0	0	0	0	0	0	0	0	0	0	0	0	0	0	0	0	0	0	0	0	0	0	0	0	0
k__Bacteria|p__Actinobacteria|c__Actinobacteria|o__Coriobacteriales|f__Coriobacteriaceae|g__Slackia|s__Slackia_piriformis	0	0	0	0.00425065	0	0	0	0	0	0	0	0	0	0	0	0	0	0	0	0	0	0	0	0	0	0	0	0	0	0	0	0	0	0	0	0	0	0	0	0	0	0	0	0	0	0	0	0	0
k__Bacteria|p__Actinobacteria|c__Actinobacteria|o__Coriobacteriales|f__Coriobacteriaceae|g__Slackia|s__Slackia_unclassified	0	0	0	0	0	0	0	0	0	0	0	0	0	0	0	0	0	0	0	0	0	0	0	0	0	0	0	0	0	0	0	0	0	0	0	0	0	0	0	9e-05	0	0	0	0	0	0	0	0	0
k__Bacteria|p__Bacteroidetes|c__Bacteroidia|o__Bacteroidales|f__Bacteroidaceae|g__Bacteroides|s__Bacteroides_caccae	0.0451478	1.32674	0.0614715	0.0285559	0.0880306	1.31071	1.20039	6.16014	0.10901	0.04104	4.12179	1.61176	0.0535399	0.0141001	0.36715	0	0.56417	0.14265	0	3.84582	0.09725	0.9316	0	0.742979	1.18725	0.22654	0.6363	1.03473	0.789913	1.54383	0	3.34925	0	0	1.56798	0	0.27666	0	6.74502	0	0	0.26414	0	3.51939	1.52575	8.93051	3.6837	0	0
k__Bacteria|p__Bacteroidetes|c__Bacteroidia|o__Bacteroidales|f__Bacteroidaceae|g__Bacteroides|s__Bacteroides_cellulosilyticus	0	0.737243	0.546184	0	0.0413566	0	0.214	0.423903	0	0.0025	0.00023	0.00959	0	0	0.00121	0	0	0	0	0.237257	0.02014	0.9576	0	0	0	0	0	0.00288442	0	0	1.41407	0.0100233	0	0	0.0188	0	0	0	0	0	0	0	3.67305	0.09894	0	0.06522	0	0	0
k__Bacteria|p__Bacteroidetes|c__Bacteroidia|o__Bacteroidales|f__Bacteroidaceae|g__Bacteroides|s__Bacteroides_clarus	0.21055	0	0.00615015	0	0.0533431	0	0.00821	0	0	0	0	0	0	0	0.19461	0	0.00302	0.01822	0	0	0	0	0	0	0.0099	0	0	0	0	0.12952	0	0	0	0	0.0005	0	0.06261	0	0	0	0	0.041	0	0	0.183605	0	0	0	0
k__Bacteria|p__Bacteroidetes|c__Bacteroidia|o__Bacteroidales|f__Bacteroidaceae|g__Bacteroides|s__Bacteroides_coprocola	6.79717	0	0	2.32015	0	0	1.52008	25.438	0.78876	6.31162	0	9.4434	0	8.1041	0	3.63754	0	1.06835	0	0	3.79707	0	0	0.00243078	0	5.73307	0.00039	9.69738	0.00590407	0.00419	0	4.14302	0	0.922923	11.1762	0	1.9546	0	0	0.02402	0	18.7468	0	0	1.48727	23.8414	0.04481	0	0
k__Bacteria|p__Bacteroidetes|c__Bacteroidia|o__Bacteroidales|f__Bacteroidaceae|g__Bacteroides|s__Bacteroides_coprophilus	0	0	0	2.29727	0	0	0.00075	0	0.37069	0	0	0	0	0	0	0	0	0	0	0	0	0	0.275592	0	0	0	0	0	0	0	0	0	0	0	0	0	0	0	0	0	0	0	0	6.74155	5.48016	0	0	0	0
k__Bacteria|p__Bacteroidetes|c__Bacteroidia|o__Bacteroidales|f__Bacteroidaceae|g__Bacteroides|s__Bacteroides_dorei	0.0655704	0.456469	1.22838	0.000876319	0.489941	0.00101	0.12251	0.63878	0.0295	0.00302	1.00984	0.03053	0.781604	0.0825103	0.29131	0.000910011	0	0	0.0324	0.00523559	0.30577	0.00953	0.00217136	6.5038	0.14546	2.99784	2.70261	0.386212	6.98629	4.03596	34.5257	0.159209	0	0.0757393	0.16497	0.00079	0.75137	0	48.1093	0.7812	0.00942212	0	0.000250016	0.00303	0	0	0	0	0
k__Bacteria|p__Bacteroidetes|c__Bacteroidia|o__Bacteroidales|f__Bacteroidaceae|g__Bacteroides|s__Bacteroides_eggerthii	0.0153995	0	0.0908623	0.0156428	0	11.205	0	0	0	0	0	0.0023	0.000413163	0.159021	0	0	0	0	0	13.8298	0.00459	0.01378	0	0	0.49946	0	0	16.244	0	0	0	6.99926	0	0	0	0	0	0	0	0	0.632823	0	0	0	0	0.68278	0	0	0
k__Bacteria|p__Bacteroidetes|c__Bacteroidia|o__Bacteroidales|f__Bacteroidaceae|g__Bacteroides|s__Bacteroides_faecis	3.40619	0.438186	0.00202005	0.00159148	0	0	0	0.00462058	0.01224	0.01877	0.01825	0.01118	0	0.0505102	0	0	0.00183	0	0	0	0.23977	0	0	0.0037412	0	0	0.00817	0	0.00269643	0.20306	0.00021	3.9087	0	0.0921961	0	0	0	0	0	0	0	0	6.96506	0.00287	0	0	0	0.00056	0.00508
k__Bacteria|p__Bacteroidetes|c__Bacteroidia|o__Bacteroidales|f__Bacteroidaceae|g__Bacteroides|s__Bacteroides_finegoldii	0	0.833227	0.419661	0.926702	0.265313	13.7219	0.25798	0	0.13869	0	0	0.26263	0.15024	0.0185701	0.39379	0	3.94359	0.02786	0.00504	0	1.10421	0	0.106317	0	0.15021	0	0	0.0135508	0	1.98025	0	0	0	0	0.12776	0	0.09711	0.36416	0	0	0	9.86362	0	1.87797	0	1.90811	0.00569	0	0
k__Bacteria|p__Bacteroidetes|c__Bacteroidia|o__Bacteroidales|f__Bacteroidaceae|g__Bacteroides|s__Bacteroides_fragilis	0	0.621008	0	0	2.54798	0	0	0.979632	0	0.29372	0.87634	0	0.14363	0	2.53978	0.085131	0.76164	0	0.17407	3.42334	0	0.12263	0	0.0398928	0.37326	0	4.78348	0.0233959	0.0468817	0.85777	5.08304	0.09371	0	0	0.37375	0.08269	0	0	1.09633	0	0	3.59094	0	0	0	0	1.27219	0	7.58613
k__Bacteria|p__Bacteroidetes|c__Bacteroidia|o__Bacteroidales|f__Bacteroidaceae|g__Bacteroides|s__Bacteroides_intestinalis	0.0233244	3.24665	0.0278707	0.000946827	0.0847461	0	0.00396	0.0463858	0	0	2.53055	0.0583	0	0.00574002	0.19806	0	0	0.00348	0	0.262173	0	0	0	0	0.03049	0	0.26798	0.0312178	0	0.0025	0.04571	0.211341	0	0	0.05162	0	0	0	0	0	0	0	0.637091	0	0	0	0	0	4.36823
k__Bacteria|p__Bacteroidetes|c__Bacteroidia|o__Bacteroidales|f__Bacteroidaceae|g__Bacteroides|s__Bacteroides_massiliensis	4.17909	0	0.00104003	4.62258	0	20.7948	0.52043	0.00245031	0.00157	0	0	1.50654	3.14574	2.32081	0	2.82076	0	0.63257	0	0	1.0833	10.4493	0	0	0	0.00093	0	0	0.000501195	0.00218	0.00235	0	0	0.00149334	0	2.30653	5.9591	0	0	0.00028	0	0	0	0.00039	0	0.00346	0.00082	14.728	0
k__Bacteria|p__Bacteroidetes|c__Bacteroidia|o__Bacteroidales|f__Bacteroidaceae|g__Bacteroides|s__Bacteroides_nordii	0	0.0135565	0	0	0	0.0103	0	0	0	0	0.21368	0	0	0	0.00448	0	0	0	0	0.0822278	0	0	0	0	0	0	0	0.00386592	0	0	0.02775	0	0	0	0	0.01201	0	0.4299	0	0	0	0	0	0.1191	0	0	0	0	0.01074
k__Bacteria|p__Bacteroidetes|c__Bacteroidia|o__Bacteroidales|f__Bacteroidaceae|g__Bacteroides|s__Bacteroides_oleiciplenus	0	0	0	0	0	0	0	0	0	0	0.00408	0	0	0	0	0	0	0	0	0.00148997	0	0	0	0	0	0	0	0	0	0	0	0	0	0	0	0	0	0	0	0	0	0	0.000430028	0	0	0	0	0	0
k__Bacteria|p__Bacteroidetes|c__Bacteroidia|o__Bacteroidales|f__Bacteroidaceae|g__Bacteroides|s__Bacteroides_ovatus	0.175718	0.155921	0.463342	0.00942798	0.252466	0.00155	0.04963	1.69963	0.0593	0.08142	1.02626	1.03801	0.159541	0.0401602	0.48541	0.275473	0.02507	0.19574	0.01675	0.869532	0.09022	1.97527	0.0781089	0.296996	0.52117	0.35456	0.98504	3.36298	0.327871	0.09571	2.23217	1.65321	0	0	0.12004	0.91931	0.06959	32.2099	5.90082	0.02467	2.46509	1.7017	1.07709	4.26839	0	0.38904	4.33119	0	14.8576
k__Bacteria|p__Bacteroidetes|c__Bacteroidia|o__Bacteroidales|f__Bacteroidaceae|g__Bacteroides|s__Bacteroides_plebeius	0	0	5.22542	0	8.90397	0	2.28172	0	0.4439	4.30664	0.00452	0.00436	30.3116	30.46	9.69243	0	30.977	2.08153	0	0	21.7967	0.01534	0.140508	0.0363317	0	21.0078	0.00223	0	0.0164492	0.00036	0	0	0	0.98866	2.45597	0	4.33227	0	0	0.00043	0	11.2503	0	0	1.36907	24.3162	0.05377	0	0.00054
k__Bacteria|p__Bacteroidetes|c__Bacteroidia|o__Bacteroidales|f__Bacteroidaceae|g__Bacteroides|s__Bacteroides_salyersiae	0.637142	0	0.515033	0.0166299	0.0255149	0	0	0.145758	0.02123	0	0	0	0	0	0.60546	0	0	0	0	0	0.08515	0	0	0.00166053	0.25776	0	0.09533	0	0.00192459	0.62752	0	0	0	0	1.28834	0	0.44355	0	0	0	0	0	5.87451	0	0	0	0.77829	0	0
k__Bacteria|p__Bacteroidetes|c__Bacteroidia|o__Bacteroidales|f__Bacteroidaceae|g__Bacteroides|s__Bacteroides_sp_2_1_22	0	0.136094	0	0	0	0	0	0.88492	0	0	0	0	0	0	0	0	0	0	0	0	0	1.29584	0	0	0	0	0	0	0	0	0	0	0	0	0	0	0	13.1926	0	0	0	0	0	0	0	0	0.23202	0	0
k__Bacteria|p__Bacteroidetes|c__Bacteroidia|o__Bacteroidales|f__Bacteroidaceae|g__Bacteroides|s__Bacteroides_sp_3_1_19	0	0	0	0	0	0	0	0	0	0	0	0	0	0	0	0	0	0	0	0	0	0	0	0	0	0	0	0	0	0	0	0	0	0	0	0	0	0	0	0	0	0	0	1.08776	0	0	4.50281	0	0
k__Bacteria|p__Bacteroidetes|c__Bacteroidia|o__Bacteroidales|f__Bacteroidaceae|g__Bacteroides|s__Bacteroides_sp_3_2_5	0	0	0	0	0	0	0	0	0	0	0	0	0	0	1.72069	0	0	0	0	0	0	0	0	0	0	0	0	0	0	0	0	0	0	0	0	0	0	0	0	0	0	0	0	0	0	0	0	0	0
k__Bacteria|p__Bacteroidetes|c__Bacteroidia|o__Bacteroidales|f__Bacteroidaceae|g__Bacteroides|s__Bacteroides_stercoris	5.94579	0.586567	0	6.29981	0.739943	0.70181	2.22158	0.000410051	0.10239	1.75099	0	1.50071	6.84251	0.799823	6.00976	0.919501	3.13494	0.00301	0	0	0.30457	3.37843	0	5.58719	14.5003	1.73004	0	5.05512	6.07887	38.1144	0.0016	3.33112	0	0.0989612	0	0.7779	0.04697	0	0	0.00022	21.5694	2.43159	0	0.0003	0.0035094	0.00514	35.2243	0	0.00223
k__Bacteria|p__Bacteroidetes|c__Bacteroidia|o__Bacteroidales|f__Bacteroidaceae|g__Bacteroides|s__Bacteroides_thetaiotaomicron	0.0152294	0.816446	0.201165	0.0581392	0.406246	0.56422	0.05202	0.64267	0.15497	0.24608	1.42129	0.28716	0.0636069	0.0505702	0.20166	0.116511	1.47953	0.1641	0.0131	0.394801	0.15391	1.7426	0.0957699	0.266476	0.50639	0.09287	0.26032	0.120324	0.275928	0.08034	1.17907	0.389589	0	0.908732	0.50463	0.59298	2.47501	19.5982	0	0	0.00540122	0.67484	0.0438328	4.99191	0.000152142	0.30461	2.13674	12.0076	15.3548
k__Bacteria|p__Bacteroidetes|c__Bacteroidia|o__Bacteroidales|f__Bacteroidaceae|g__Bacteroides|s__Bacteroides_uniformis	0.527835	1.7796	2.18455	0.279536	0.225959	5.39334	0.11336	0.148048	0.15347	0.18763	3.07532	0.78431	0.724829	0.0325901	0.40384	0.0513206	0.14102	0.58646	0	1.11525	2.20621	0.28986	0.0198024	0.815653	1.58506	4.9208	7.24253	0.204303	0.245676	0.77431	3.75133	0.0172629	68.4885	0	0.18369	0.71009	0.1489	0.34994	6.82873	0.08747	0	6.84523	0.0030502	0.37611	2.07754	3.04155	0.02142	0.00155	2.17206
k__Bacteria|p__Bacteroidetes|c__Bacteroidia|o__Bacteroidales|f__Bacteroidaceae|g__Bacteroides|s__Bacteroides_vulgatus	2.64549	2.72316	0.0290307	1.58644	0.406487	8.25827	1.25458	3.63692	0.24885	0.06814	10.4091	1.36635	1.73193	1.0085	1.55493	1.2372	2.04658	0.36872	0.37718	0.0447095	1.6428	3.2985	0.0337911	1.94615	21.324	0.01151	5.03973	2.32539	2.03076	17.75	0.00514	1.17261	0	0.194886	3.79368	2.0976	0.04677	0	0.0007	1.36536	20.7592	10.4009	5.54017	14.4833	0.0082968	6.14842	6.0691	25.4449	8.38547
k__Bacteria|p__Bacteroidetes|c__Bacteroidia|o__Bacteroidales|f__Bacteroidaceae|g__Bacteroides|s__Bacteroides_xylanisolvens	0.0222737	0.0243213	0.0668617	0.016358	0.00381522	0	0.42202	0.190434	0.01269	0.03069	0.06858	0.00323	0.0141987	0.0507502	0.56625	0	0.30849	0.05599	0.02195	0.109461	0.03365	0.63779	0.11124	0.0688222	0.03167	0.00525	0.02519	0.305488	0.0590507	0.165	0.24937	0.288349	0	0	0.03483	0.0362	0.00638	0.00484	1.88966	0	0	0.00658	0.00268017	0	0.0585442	0.32587	0.66858	0	2.02692
k__Bacteria|p__Bacteroidetes|c__Bacteroidia|o__Bacteroidales|f__Bacteroidales_noname|g__Bacteroidales_noname|s__Bacteroidales_bacterium_ph8	0.087764	5.22663	0.0939224	0.0169321	0.0121266	0	0.00471	0.00924115	0.07566	0	0.36228	0.50139	0	0.0911204	0.95038	0	0.49718	0.16117	0	0	0	0.0721	0	0.03107	0.19161	0	0.03254	0.223312	0.0275256	0	0.49877	1.21606	0	0	0.19039	0	0.00571	0	0.11119	0	0	0	0	6.199	0.0312398	0	0	0	0.47187
k__Bacteria|p__Bacteroidetes|c__Bacteroidia|o__Bacteroidales|f__Porphyromonadaceae|g__Barnesiella|s__Barnesiella_intestinihominis	0.270326	1.08251	1.11842	0.0225526	0.271352	0	0.90506	0.991974	0.34759	0.06949	0.5051	1.17696	0.043765	0.135151	0	0	0	0	0	0	0.04672	0.00576	0.00292183	0.240247	0.28527	0	0	0.676216	0.279957	0.18387	0	1.2258	0	0	0	0	0	0	0.71794	0	0	0	0	0	0.392942	0.15892	0	0	5.66722
k__Bacteria|p__Bacteroidetes|c__Bacteroidia|o__Bacteroidales|f__Porphyromonadaceae|g__Butyricimonas|s__Butyricimonas_synergistica	0	0.027684	0	0	0	0	0	0	0	0	0	0	0	0	0.00018	0	0	0	0	0.0702873	0	0	0	0	0	0	0	0	0	0	0	0	0	0	0	0	0	0	0	0	0	0	0	0.00065	0	0	0	0	0
k__Bacteria|p__Bacteroidetes|c__Bacteroidia|o__Bacteroidales|f__Porphyromonadaceae|g__Coprobacter|s__Coprobacter_fastidiosus	0	0.252593	0	0	0	0	0.17388	0.0360345	0	0	0	0.32103	0	0.0793003	0.09414	0	0	0	0	0	0	0	0	0	0.11729	0	0	0.0424651	0	0	0	0	0	0	0	0.59332	0	0	0	0	0	0	0.247146	0	0	0.16109	0	0	0
k__Bacteria|p__Bacteroidetes|c__Bacteroidia|o__Bacteroidales|f__Porphyromonadaceae|g__Dysgonomonas|s__Dysgonomonas_unclassified	0	0	0	0	0	0	0	0	0	0	0	0	0	0	0	0	0	0	0	0	0	0	0	0	0	0	0	0	0	0	0	0	0	0	0	0	0	0	0	0	0	0	0	0	0	0	0	0	0
k__Bacteria|p__Bacteroidetes|c__Bacteroidia|o__Bacteroidales|f__Porphyromonadaceae|g__Odoribacter|s__Odoribacter_splanchnicus	0.607084	2.10585	1.8942	0.0710221	0.298819	0.15601	0.20872	0.502393	0.46245	0	5.03049	1.344	0	0.447962	1.33724	0	3.18732	0	0	0.336319	0	1.27118	0	0	0.38737	0	0	0.95294	0	0	0	0.669026	0	0	1.58913	0	0	0	0.41187	0	0	0	0	2.1844	0	0	0.10849	0	0
k__Bacteria|p__Bacteroidetes|c__Bacteroidia|o__Bacteroidales|f__Porphyromonadaceae|g__Odoribacter|s__Odoribacter_unclassified	0	0	0	0	0	0	0	0	0	0	0	0	0.00662068	0	0	0	0	0	0.00606	0	0.02005	0	0	0.0213869	0	0	0	0	0.027255	0	0	0	0	0	0	0	0.00361	0	0	0	0.0039909	0.03526	0	0	0	0	0	0	0
k__Bacteria|p__Bacteroidetes|c__Bacteroidia|o__Bacteroidales|f__Porphyromonadaceae|g__Parabacteroides|s__Parabacteroides_distasonis	5.18724	0	0.275047	0.00845094	0.0535133	0.1611	0.20549	1.05389	0.34797	0.0039	0.08687	0.24991	0.09797	0.00626003	1.01192	0.171282	0.3135	0.00872	0.03725	0.863541	0.26427	0	0.0283277	0.199534	0.14092	0	0.49153	0.655254	0.330277	1.90699	2.11729	0.779241	0	0.494526	0.01502	0.62881	7.31108	0	0.07979	0.05798	0.00877198	0.07793	0	4.68196	0	0.00217	0.0461	14.7132	0.0013
k__Bacteria|p__Bacteroidetes|c__Bacteroidia|o__Bacteroidales|f__Porphyromonadaceae|g__Parabacteroides|s__Parabacteroides_goldsteinii	0.0246452	0.699196	0	0	0	0.04312	0.07195	0.015932	0	0.00587	0.88512	0.01758	0	0	0.00214	0	0	0	0	0.282919	0	0	0	0	0.00887	0	0	0.03262	0	0	0.00313	0	0	0	0.30949	0	0	4.22426	0.08352	0	0	0	0.147069	0.06443	0	0	0	0	0
k__Bacteria|p__Bacteroidetes|c__Bacteroidia|o__Bacteroidales|f__Porphyromonadaceae|g__Parabacteroides|s__Parabacteroides_johnsonii	0.102303	0.0565524	0.114933	0	0	0	0	0	0	0	0	0	0	0.0606702	0.03343	0	0	0	0.04053	0	0	0	0	0.221271	0.00387	0	0	0	0.222921	0	0	0	0	0.00543214	0.18209	0	0	0	0	0	0	0.05226	0	0	0	0	0.01404	0	0
k__Bacteria|p__Bacteroidetes|c__Bacteroidia|o__Bacteroidales|f__Porphyromonadaceae|g__Parabacteroides|s__Parabacteroides_merdae	1.25272	0.0417269	0.598905	0.1109	0.543544	0.55038	1.4537	2.02413	0.21179	0.29747	0.93977	0.39429	0.187707	0.518512	0.63273	0.153152	1.85947	0.55456	0	0	0.202	1.90938	0.315978	0	0.63734	0	1.75283	2.15505	0	3.51441	0	1.61011	0	1.64954	3.33647	0	2.45164	13.7187	0	0	0	2.24125	22.394	6.42537	0.732573	3.90551	0.03345	0	2.83205
k__Bacteria|p__Bacteroidetes|c__Bacteroidia|o__Bacteroidales|f__Porphyromonadaceae|g__Parabacteroides|s__Parabacteroides_unclassified	0	2.83667	0	0.00597307	0	0.52206	0	0	0	0.14914	0	0.08465	0.155057	0	0	0	0	0	0	0.666234	0	0	0	0.226293	0	0	0	0	0.037349	0	1.4812	0	0	0	0	0.15668	0	0	4.35754	0.0858	0.00523118	0	0	0	0	1.09409	4.9921	0	0.3186
k__Bacteria|p__Bacteroidetes|c__Bacteroidia|o__Bacteroidales|f__Porphyromonadaceae|g__Porphyromonas|s__Porphyromonas_asaccharolytica	0	0	0	0	0	0	0	0	0	0	0	0	0	0	0	0	0	0	0.0006	0	0	0	0	0	0	0	0	0	0	0	0	0.000955589	0	0	0	0	0	0	0	0	0	0	0	0	0.00230241	0	0	0	0
k__Bacteria|p__Bacteroidetes|c__Bacteroidia|o__Bacteroidales|f__Porphyromonadaceae|g__Porphyromonas|s__Porphyromonas_bennonis	0	0	0	0	0	0	0	0	0	0	0	0	0	0	0	0	0	0	0	0	0	0	0	0	0	0	0	0	0	0	0	0	0	0	0	0	0	0	0	0	0	0	0	0	0.000405712	0	0	0	0
k__Bacteria|p__Bacteroidetes|c__Bacteroidia|o__Bacteroidales|f__Porphyromonadaceae|g__Porphyromonas|s__Porphyromonas_uenonis	0	0	0	0	0	0	0	0	0	0	0	0	0	0	0	0	0	0	0	0	0	0	0	0	0	0	0	0	0	0	0	0	0	0	0	0	0	0	0	0	0	0	0	0	0	0	0	0	0
k__Bacteria|p__Bacteroidetes|c__Bacteroidia|o__Bacteroidales|f__Prevotellaceae|g__Alloprevotella|s__Alloprevotella_unclassified	0	0	0	0	0.0104443	0	0	0	0	0	0	0	0	0	0	0	0	0	0	0	0	0	0.00324203	0	0	0.00801	0	0	0	0	0	0	0	0	0	0	0	0	0	0	0	0	0	0	0	0	0	0	0
k__Bacteria|p__Bacteroidetes|c__Bacteroidia|o__Bacteroidales|f__Prevotellaceae|g__Paraprevotella|s__Paraprevotella_clara	0.0679718	0.699798	0.41624	0.254838	0	0	1.34899	0	0.05518	0.20683	0	0	0.128907	0.0438802	0.5202	0	0.39198	0.10972	0	0	0	0	0	0.131802	0	0.18847	0	0.0990217	0.120708	0	0	0.202782	0	0	0.0488	0	0.35752	0	0	0	0	0.00203	0	0	0.323525	0.15553	0	0	1.30784
k__Bacteria|p__Bacteroidetes|c__Bacteroidia|o__Bacteroidales|f__Prevotellaceae|g__Paraprevotella|s__Paraprevotella_unclassified	0.174688	1.06809	2.07427	0.453027	0	0.49087	1.83201	0	0.21335	0.21713	0	0.13501	0.37365	0.0309801	0.90168	0	0.87153	0.49428	0	0	0	0.98808	0.0342915	0.470121	0	0.9207	0	0.45038	0.580824	0	0	1.13256	0	0	0.11736	0	2.02647	0	0	0	0	0.0351	0	0	1.35863	0.12036	0	0	1.26957
k__Bacteria|p__Bacteroidetes|c__Bacteroidia|o__Bacteroidales|f__Prevotellaceae|g__Paraprevotella|s__Paraprevotella_xylaniphila	0.00138085	0.0555055	0.0110903	0.0358283	0	1.13442	0.2096	0	0.00748	0.00791	0	0.43169	0.0198923	0.000870003	0.0147	0	0.06956	0.00212	0	0	0	2.49356	0.023895	0.000730235	0	0.01468	0	0.00196301	0.000240573	0	0	0.00245129	0	0	0	0	0.00899	0	0	0	0	0	0	0	0.00601467	0.00143	0	0	0.08481
k__Bacteria|p__Bacteroidetes|c__Bacteroidia|o__Bacteroidales|f__Prevotellaceae|g__Prevotella|s__Prevotella_bergensis	0	0	0	0	0	0	0	0	0	0	0	0	0	0	0	0	0	0	0	0	0	0	0	0	0	0	0	0	0	0	0	0	0	0	0	0	0	0	0	0	0	0	0	0	0	0	0	0	0
k__Bacteria|p__Bacteroidetes|c__Bacteroidia|o__Bacteroidales|f__Prevotellaceae|g__Prevotella|s__Prevotella_bivia	0	0	0	0	0	0	0	0	0	0	0.02367	0	0	0	0	0	0	0	0.0004	0	0	0	0	0	0	0	0	0	0	0	0	0	0	0	0	0	0	0	0	0	0	0	0	0	0	0	0	0	0
k__Bacteria|p__Bacteroidetes|c__Bacteroidia|o__Bacteroidales|f__Prevotellaceae|g__Prevotella|s__Prevotella_buccalis	0	0	0	0	0	0	0	0	0	0	0	0	0	0	0	0	0	0	0	0	0	0	0	0	0	0	0	0	0	0	0	0	0	0	0	0	0	0	0	0	0	0	0	0	0	0	0	0	0
k__Bacteria|p__Bacteroidetes|c__Bacteroidia|o__Bacteroidales|f__Prevotellaceae|g__Prevotella|s__Prevotella_copri	0.00272168	0.0104053	1.21171	0.00849123	0.0342269	0.00333	39.6981	0.00637079	64.1065	60.6191	22.0863	5.37606	0.0151459	0.00306001	0.01347	58.4613	0.00477	33.7592	41.4478	0.0112679	0.0631	0.01271	73.9647	0.0454346	0.0028	0.02923	0.0417	0.0139814	0.00981339	0.01125	0.00986	1.30466	0.00782	65.9971	30.5801	77.141	27.2111	0	0.00292	0.01913	0.00911205	0.00436	0.0185412	0.03419	57.1472	0.01476	0.00537	0.00063	0.01041
k__Bacteria|p__Bacteroidetes|c__Bacteroidia|o__Bacteroidales|f__Prevotellaceae|g__Prevotella|s__Prevotella_disiens	0	0	0	0	0	0	0	0	0	0	0	0	0	0	0	0	0	0	0	0	0	0	0	0	0	0	0	0	0	0	0	0	0	0	0	0	0	0	0	0	0	0	0	0	0	0	0	0	0
k__Bacteria|p__Bacteroidetes|c__Bacteroidia|o__Bacteroidales|f__Prevotellaceae|g__Prevotella|s__Prevotella_histicola	0	0	0	0	0.00736008	0	0	0	0	0	0	0	0	0	0	0	0	0	0	0	0	0	0	0	0	0	0	0	0	0	0	0	0	0	0	0	0	0	0	0	0	0	0	0	0	0	0	0	0
k__Bacteria|p__Bacteroidetes|c__Bacteroidia|o__Bacteroidales|f__Prevotellaceae|g__Prevotella|s__Prevotella_melaninogenica	0	0	0	0	0.000871193	0	0	0	0	0	0	0	0	0	0	0	0	0	0	0	0	0	0	0	0	0	0	0	0	0	0	0	0	0	0	0	0	0	0	0	0	0	0	0	0	0	0	0	0
k__Bacteria|p__Bacteroidetes|c__Bacteroidia|o__Bacteroidales|f__Prevotellaceae|g__Prevotella|s__Prevotella_stercorea	0	0	0	0	0.000931275	0	0	0	0	0	0	0	0	0	0	0	0	6.4256	6.89751	0	0	23.1449	4.78736	0	0	0.01408	0.00079	0	0	0	0	0	0	1.23063	0	0	0	0	0	0	0	0	0	0	5.6955	0	0	0	0
k__Bacteria|p__Bacteroidetes|c__Bacteroidia|o__Bacteroidales|f__Prevotellaceae|g__Prevotella|s__Prevotella_timonensis	0	0	0	0	0	0	0	0	0	0	0	0	0	0	0	0	0	0	0	0	0	0	0	0	0	0	0	0	0	0	0	0	0	0	0	0	0	0	0	0.00336	0	0	0	0	0	0	0	0	0
k__Bacteria|p__Bacteroidetes|c__Bacteroidia|o__Bacteroidales|f__Rikenellaceae|g__Alistipes|s__Alistipes_finegoldii	0.207618	0	0.0117503	0.00301172	0.0144197	0	0.05965	0.208506	0	0.00275	2.80677	0.88128	0.00426263	0.0265801	0.43277	0	0	0.03065	0	0.648241	0.01484	0.12332	0	0.0136244	0.08714	0	0	0.295663	0.0189452	0.01162	0	0.0661122	0	0	0.43277	0.03357	0	0	0.282	0	0	0	0.858085	0.0004	0.391187	0.01546	0.14711	0	0
k__Bacteria|p__Bacteroidetes|c__Bacteroidia|o__Bacteroidales|f__Rikenellaceae|g__Alistipes|s__Alistipes_indistinctus	0.00733452	0.290851	0	0	0	0	0	0.144768	0.26658	0	0.02909	0.75247	0	0.00436002	0.01714	0	0	0.04957	0	0.115183	0	0.02578	0	0	0	0	0	0.146434	0	0	0.07469	0	0	0	0.00576	0	0.00424	0	0	0	0	0	0	0.23331	0	0	0	0	0.09974
k__Bacteria|p__Bacteroidetes|c__Bacteroidia|o__Bacteroidales|f__Rikenellaceae|g__Alistipes|s__Alistipes_onderdonkii	0.118483	0.952539	0.979685	0.00657743	0.116409	0.06851	0.07366	0.189204	0.04737	0.04299	0.34188	0.19124	0.0033053	0.12418	1.93012	0	0	0	0.0144	1.03306	0.02684	0.0008	0	0.18543	0.00442	0	0.46959	0.224194	0.1635	0.00266	0.57726	1.14117	0	0	1.12075	0	0	0	0.55818	0	0	0	4.08102	0	0.337694	0.23095	0	0	0.68413
k__Bacteria|p__Bacteroidetes|c__Bacteroidia|o__Bacteroidales|f__Rikenellaceae|g__Alistipes|s__Alistipes_putredinis	3.27914	6.51449	2.75106	0.527524	0.815006	0.40117	3.14836	2.30472	0.63044	0.07595	10.128	12.7107	0	3.06738	12.8306	0	16.8681	0.86082	0	5.06211	0.19892	0.97795	0.00526329	0.390186	1.97981	0	0	1.53623	0.361933	0.06993	0	10.4492	0	0	5.73688	0	0.54569	0	1.12333	0	0	0	9.36341	0	0.259473	3.22567	0	0	0
k__Bacteria|p__Bacteroidetes|c__Bacteroidia|o__Bacteroidales|f__Rikenellaceae|g__Alistipes|s__Alistipes_senegalensis	0.0171606	0.0141592	0.0241206	0	0.00367503	0.00612	0	0.00289036	0	0	0.05709	0.01037	0	0	0.25914	0	0	0.06917	0	0	0.00115	0.08315	0	0.000320103	0	0	0.00031	0.130169	0.00404965	0	0	0.046668	0	0	0.00056	0	0	0	0	0	0	0	0.242446	0	0.0688188	0	0	0	0.01883
k__Bacteria|p__Bacteroidetes|c__Bacteroidia|o__Bacteroidales|f__Rikenellaceae|g__Alistipes|s__Alistipes_shahii	0.639364	1.0084	0.548724	0.0819811	0.116069	0	0.666	1.67153	0.04373	0.01799	2.08689	2.02369	0.0376381	0.0193901	1.17649	0.00547006	0	0.27558	0	0.00901225	0.10198	0.25364	0	0.110716	0.136	3.24703	0	0.976206	0.0820455	0.05822	0.00427	1.20369	0	0.194595	0.67975	0.32629	0.00037	0	0	0	0	0	3.81045	0	0.227198	0.00634	0.34605	0	0.00086
k__Bacteria|p__Bacteroidetes|c__Bacteroidia|o__Bacteroidales|f__Rikenellaceae|g__Alistipes|s__Alistipes_sp_AP11	0	0	0	0	0	0	0	0.268023	0	0	0	0	0	0	0	0	0	0	0	0	0	0	0	0	0	0	0	0	0	0	0	0	0	0	0	0	0	0	0	0	0	0	0	0	0.154992	0	0	0	0
k__Bacteria|p__Bacteroidetes|c__Bacteroidia|o__Bacteroidales|f__Rikenellaceae|g__Alistipes|s__Alistipes_unclassified	0	0	0	0	0	0	0	0	0	0	0	0	0	0	0	0	0	0	0.00012	0	0	0	0	0	0	0	0	0	0	0	0.09364	0	0	0	0	0	0	0	0	0	0	0.04356	0	1.36267	0	0	0	0	0.33169
k__Bacteria|p__Bacteroidetes|c__Flavobacteriia|o__Flavobacteriales|f__Flavobacteriaceae|g__Cellulophaga|s__Cellulophaga_unclassified	0	0	0	0	0	0	0	0	0	0	0	0	0	0.00586002	0	0	0	0	0	0	0	0	0	0	0	0.01248	0	0	0	0	0	0	0	0	0	0	0	0	0.00491	0	0	0	0	0	0	0	0	0.00814	0
k__Bacteria|p__Bacteroidetes|c__Flavobacteriia|o__Flavobacteriales|f__Flavobacteriaceae|g__Myroides|s__Myroides_unclassified	0	0	0	0	0	0	0	0	0	0	0	0	0	0	0	0	0	0	0	0	0	0	0	0	0	0	0	0	0	0	0	0	0	0	0	0	0	0	0	0	0	0	0	0	0	0	0	0	0
k__Bacteria|p__Bacteroidetes|c__Flavobacteriia|o__Flavobacteriales|f__Flavobacteriaceae|g__Riemerella|s__Riemerella_unclassified	0	0	0	0	0	0	0	0	0	0	0	0	0	0	0	0	0	0	0	0	0	0	0	0	0	0	0	0	0	0	0	0	0	0	0	0	0	0	0	0	0	0	0	0	0	0	0	0	0
k__Bacteria|p__Bacteroidetes|c__Sphingobacteriia|o__Sphingobacteriales|f__Sphingobacteriaceae|g__Pedobacter|s__Pedobacter_unclassified	0	0	0	0	0	0	0	0	0	0	0	0	0	0	0	0	0	0	0	0	0	0	0	0	0	0	0	0	0	0	0	0	0	0	0	0	0	0	0	0	0	0	0	0	0	0	0	0	0
k__Bacteria|p__Bacteroidetes|c__Sphingobacteriia|o__Sphingobacteriales|f__Sphingobacteriaceae|g__Sphingobacterium|s__Sphingobacterium_unclassified	0	0	0	0	0	0	0	0	0	0	0	0	0	0	0	0	0	0	0	0	0	0	0	0	0	0	0	0	0	0	0	0	0	0	0	0	0	0	0	0	0	0	0	0	0	0	0	0	0
k__Bacteria|p__Candidatus_Saccharibacteria|c__Candidatus_Saccharibacteria_noname|o__Candidatus_Saccharibacteria_noname|f__Candidatus_Saccharibacteria_noname|g__Candidatus_Saccharibacteria_noname|s__candidate_division_TM7_single_cell_isolate_TM7c	0	0	0	0	0.00113155	0	0	0	0	0	0	0	0.00664084	0	0	0	0	0	0	0	0.00087	0	0.0145991	0.00409132	0	0	0.02203	0	0.00582388	0	0	0	0	0	0	0	0	0	0.00046	0	0	0	0	0	0	0	0	0	0
k__Bacteria|p__Chlorobi|c__Chlorobia|o__Chlorobiales|f__Chlorobiaceae|g__Chlorobium|s__Chlorobium_phaeobacteroides	0	0	0	0	0	0	0	0	0	0	0	0	0	0	0	0	0	0	0	0	0	0	0	0	0	0	0	0	0	0	0	0	0	0	0	0	0	0	0	0	0	0	0	0	0	0	0	0	0
k__Bacteria|p__Cyanobacteria|c__Cyanobacteria_noname|o__Oscillatoriales|f__Oscillatoriales_noname|g__Arthrospira|s__Arthrospira_maxima	0	0	0	0	0	0	0	0	0	0	0	0	0	0	0	0	0	0	0	0	0	0	0	0	0	0	0	0	0	0	0	0	0	0	0	0	0	0	0	0	0	0	0	0	0	0	0	0	0
k__Bacteria|p__Cyanobacteria|c__Cyanobacteria_noname|o__Oscillatoriales|f__Oscillatoriales_noname|g__Arthrospira|s__Arthrospira_platensis	0	0	0	0	0	0	0	0	0	0	0	0	0	0	0	0	0	0	0	0	0	0	0	0	0	0	0	0	0	0	0	0	0	0	0	0	0	0	0	0	0	0	0	0	0	0	0	0	0
k__Bacteria|p__Cyanobacteria|c__Cyanobacteria_noname|o__Oscillatoriales|f__Oscillatoriales_noname|g__Arthrospira|s__Arthrospira_unclassified	0	0	0	0	0	0	0	0	0	0	0	0	0	0	0	0	0	0	0	0	0	0	0	0	0	0	0	0	0	0	0	0	0	0	0	0	0	0	0	0	0	0	0	0	0	0	0	0	0
k__Bacteria|p__Deinococcus_Thermus|c__Deinococci|o__Deinococcales|f__Deinococcaceae|g__Deinococcus|s__Deinococcus_unclassified	0	0	0	0	0	0	0	0	0	0	0	0	0	0	0	0	0	0	0	0	0	0	0	0	0	0	0	0	0	0	0	0	0	0	0	0	0	0	0	0	0	0	0	0	0	0	0	0	0
k__Bacteria|p__Firmicutes|c__Bacilli|o__Bacillales|f__Bacillales_noname|g__Gemella|s__Gemella_haemolysans	0	0	0	0	0.00338464	0	0	0	0	0.01352	0	0	0.00175342	0	0	0.00222003	0	0	0	0	0.00585	0	0	0.0184459	0	0	0	0	0.000240573	0	0.00334	0	0	0	0	0	0	0	0	0	0	0	0	0	0	0	0	0	0
k__Bacteria|p__Firmicutes|c__Bacilli|o__Bacillales|f__Bacillales_noname|g__Gemella|s__Gemella_morbillorum	0	0.00875568	0	0	0.00760041	0	0	0	0	0.00705	0	0	0	0	0	0	0	0	0	0	0	0	0	0	0	0	0	0	0	0	0	0	0	0	0	0	0	0	0	0	0	0	0	0	0	0	0	0	0
k__Bacteria|p__Firmicutes|c__Bacilli|o__Bacillales|f__Bacillales_noname|g__Gemella|s__Gemella_sanguinis	0	0	0	0.00416	0.0171134	0	0	0	0	0.00183	0	0	0	0	0	0	0	0	0	0	0	0	0	0	0	0	0	0	0	0	0	0	0	0	0	0	0	0	0	0.00059	0	0	0	0	0	0	0	0	0
k__Bacteria|p__Firmicutes|c__Bacilli|o__Bacillales|f__Bacillales_noname|g__Gemella|s__Gemella_unclassified	0	0	0	0.000412978	0	0	0.00033	0	0	0.00991	0	0	0.00536104	0.00198001	0	0.00359004	0	0	0	0	0.00283	0	0	0.0096231	0	0	0.00439	0	0	0.00039	0.00067	0	0	0	0.00119	0	0	0	0.00089	0.00124	0	0	0	0	0	0	0	0	0.00028
k__Bacteria|p__Firmicutes|c__Bacilli|o__Lactobacillales|f__Aerococcaceae|g__Abiotrophia|s__Abiotrophia_defectiva	0	0	0	0	0.0286893	0	0	0	0	0	0	0	0	0	0	0	0	0	0	0	0	0	0	0.0313801	0	0	0.04919	0	0.00887114	0	0	0	0	0	0.00576	0	0	0	0	0	0	0	0	0	0	0.00586	0	0	0
k__Bacteria|p__Firmicutes|c__Bacilli|o__Lactobacillales|f__Carnobacteriaceae|g__Granulicatella|s__Granulicatella_adiacens	0	0	0	0.0021354	0.0797292	0	0	0	0	0.00089	0	0.00306	0.000937175	0	0	0	0	0	0	0	0	0	0	0.0166754	0	0	0.03315	0	0.00417996	0.01569	0.00276	0	0.00967	0	0	0	0	0	0	0.00302	0	0	0	0	0	0	0	0	0
k__Bacteria|p__Firmicutes|c__Bacilli|o__Lactobacillales|f__Carnobacteriaceae|g__Granulicatella|s__Granulicatella_elegans	0	0	0	0	0	0	0	0	0	0	0	0	0	0	0	0	0	0	0	0	0	0	0	0.0202965	0	0	0	0	0	0.00682	0	0	0	0	0	0	0	0	0	0	0	0	0	0	0	0	0	0	0
k__Bacteria|p__Firmicutes|c__Bacilli|o__Lactobacillales|f__Carnobacteriaceae|g__Granulicatella|s__Granulicatella_unclassified	0.000720444	0	0	0.00771564	0.0219601	0	0	0.00166021	0	0.00846	0	0.03708	0.0430395	0.0205101	0	0.0149202	0	0.00408	0	0	0.00693	0	0	0.0432739	0.01048	0	0	0	0.00806923	0.02417	0.00444	0.00613862	0.08177	0.00560253	0.00252	0.00728	0	0	0	0.01276	0	0	0.00231015	0	0	0	0.00275	0	0.00457
k__Bacteria|p__Firmicutes|c__Bacilli|o__Lactobacillales|f__Enterococcaceae|g__Enterococcus|s__Enterococcus_avium	0	0	0	0	0	0	0	0	0	0	0	0	0	0	0	0	0	0	0	0	0	0	0	0	0	0	0	0	0	0	0	0	0	0	0	0	0	0	0	0	0	0	0	0	0	0	0	0	0
k__Bacteria|p__Firmicutes|c__Bacilli|o__Lactobacillales|f__Enterococcaceae|g__Enterococcus|s__Enterococcus_casseliflavus	0	0	0	0	0	0	0	0	0	0	0	0	0	0	0	0	0	0	0	0.00943648	0	0	0	0	0	0	0	0	0	0	0	0	0	0	0	0	0	0	0	0	0	0	0	0	0	0	0	0	0
k__Bacteria|p__Firmicutes|c__Bacilli|o__Lactobacillales|f__Enterococcaceae|g__Enterococcus|s__Enterococcus_faecalis	0	0	0	0	0	0	0	0	0	0	0	0	0	0	0	0	0	0	0	0	0	0	0	0	0	0	0	0	0	0	0	0	0	0	0	0	0	0	0	0	0	0	0	0	0	0	0	0	0
k__Bacteria|p__Firmicutes|c__Bacilli|o__Lactobacillales|f__Enterococcaceae|g__Enterococcus|s__Enterococcus_faecium	0	0	0	0	0	0.00327	0	0	0	0	0	0	0	0	0	0	0	0.03841	0	0	0	0	0	0	0	0	0	0	0	0	0	0	0.01602	0	0	0	0	0	0	1.03865	0	0	0	0	0	0	0	0	0
k__Bacteria|p__Firmicutes|c__Bacilli|o__Lactobacillales|f__Lactobacillaceae|g__Lactobacillus|s__Lactobacillus_casei_paracasei	0	0	0	0	0	0	0	0	0	0	0	0	0	0	0	0	0	0	0	0	0	0	0	0	0	0	0	0	0	0	0	0	0	0	0	0	0	0	0	0	0	0	0	0	0	0	0	0	0
k__Bacteria|p__Firmicutes|c__Bacilli|o__Lactobacillales|f__Lactobacillaceae|g__Lactobacillus|s__Lactobacillus_crispatus	0	0	0	0	0	0	0	0	0	0	0	0	0	0	0	0	0	0	0	0	0	0	0	0	0	0	0	0	0	0	0	0	0	0	0	0	0	0	0	0	0.00104023	0	0	0	0	0	0	0	0
k__Bacteria|p__Firmicutes|c__Bacilli|o__Lactobacillales|f__Lactobacillaceae|g__Lactobacillus|s__Lactobacillus_curvatus	0	0	0	0	0	0	0	0	0	0	0	0	0.00172319	0	0	0	0	0	0	0	0	0	0	0	0	0	0	0	0	0	0.01963	0	0	0	0	0	0	0	0	0	0	0	0	0	0	0	0	0	0
k__Bacteria|p__Firmicutes|c__Bacilli|o__Lactobacillales|f__Lactobacillaceae|g__Lactobacillus|s__Lactobacillus_delbrueckii	0	0	0	0	0	0	0	0	0	0	0	0	0	0	0	0	0	0	0	0	0	0	0	0	0	0	0	0	0	0	0	0	0	0	0.01425	0	0	0	0	0	0	0	0	0	0	0	0	0	0
k__Bacteria|p__Firmicutes|c__Bacilli|o__Lactobacillales|f__Lactobacillaceae|g__Lactobacillus|s__Lactobacillus_fermentum	0	0	0	0	0	0	0	0	0	0	0	0	0	0	0	0	0	0	0	0	0	0	0	0	0	0	0	0	0	0	0	0	0	0	0	0.00626	0	0	0	0.11709	0.0406092	0	0.00106007	0	0	0	0	0	0
k__Bacteria|p__Firmicutes|c__Bacilli|o__Lactobacillales|f__Lactobacillaceae|g__Lactobacillus|s__Lactobacillus_gasseri	0	0	0	0	0	0	0	0	0	0	0	0	0	0	0	0	0	0	0	0	0	0	0	0	0	0	0	0	0	0	0	0	0	0	0	0	0	0	0	0	0.0250757	0	0	0	0	0	0	0	0
k__Bacteria|p__Firmicutes|c__Bacilli|o__Lactobacillales|f__Lactobacillaceae|g__Lactobacillus|s__Lactobacillus_jensenii	0	0	0	0	0	0	0	0	0	0	0	0	0	0	0	0	0	0	0	0	0	0	0	0	0	0	0	0	0	0	0	0	0	0	0	0	0	0	0	0	0	0	0	0	0	0	0	0	0
k__Bacteria|p__Firmicutes|c__Bacilli|o__Lactobacillales|f__Lactobacillaceae|g__Lactobacillus|s__Lactobacillus_johnsonii	0	0	0	0	0	0	0	0	0	0	0	0	0	0	0	0	0	0	0	0	0	0	0	0	0	0	0	0	0	0	0	0	0	0	0	0	0	0	0	0	0	0	0	0	0	0	0	0	0
k__Bacteria|p__Firmicutes|c__Bacilli|o__Lactobacillales|f__Lactobacillaceae|g__Lactobacillus|s__Lactobacillus_mucosae	0	0	0	0	0	0	0	0	0	0	0	0	0	0	0	0	0	0	0.0975	0	0	0	0	0	0	0	0	0	0	0.00043	0	0	0	0	0	0	0	0	0	0	0	0	0.00172011	0	0	0	0	0	0
k__Bacteria|p__Firmicutes|c__Bacilli|o__Lactobacillales|f__Lactobacillaceae|g__Lactobacillus|s__Lactobacillus_oris	0	0	0	0	0	0	0	0	0	0	0	0	0	0	0	0	0	0	0	0	0	0	0	0	0	0	0	0	0	0	0	0	0	0	0	0	0	0	0	0	0.22039	0	0	0	0	0	0	0	0
k__Bacteria|p__Firmicutes|c__Bacilli|o__Lactobacillales|f__Lactobacillaceae|g__Lactobacillus|s__Lactobacillus_plantarum	0	0	0	0	0	0	0	0	0	0	0	0	0	0	0	0	0	0	0	0	0	0	0	0	0	0	0.02995	0	0	0	0	0	0	0	0	0	0	0	0	0.01464	0	0	0	0	0	0	0	0	0
k__Bacteria|p__Firmicutes|c__Bacilli|o__Lactobacillales|f__Lactobacillaceae|g__Lactobacillus|s__Lactobacillus_reuteri	0	0	0	0	0	0	0	0	0	0	0	0	0	0	0	0	0	0	0	0	0	0	0	0	0	0	0	0	0	0	0	0	0	0	0	0	0	0	0	0	0	0	0	0	0	0	0	0	0
k__Bacteria|p__Firmicutes|c__Bacilli|o__Lactobacillales|f__Lactobacillaceae|g__Lactobacillus|s__Lactobacillus_ruminis	0	0	0	0	0	0	0	0	0	0	0	0	0	0	0	0	0	0	0.99621	0	0	0	0	0	0	0	0	0	0	0	0	0	0	0	0	0	0	0	0	0	0	0	0	0	0	0	0	0	0
k__Bacteria|p__Firmicutes|c__Bacilli|o__Lactobacillales|f__Lactobacillaceae|g__Lactobacillus|s__Lactobacillus_salivarius	0	0	0	0	0	0	0	0	0	0	0	0	0	0	0	0	0	0	0.14437	0	0	0	0.412888	0	0	0	0	0	0	0	0	0	0	0	0	0	0	0	0	0	0.0084119	0	0.00457029	0	0	0	0	0	0.0007
k__Bacteria|p__Firmicutes|c__Bacilli|o__Lactobacillales|f__Lactobacillaceae|g__Lactobacillus|s__Lactobacillus_sanfranciscensis	0	0	0	0	0	0	0	0	0	0	0	0	0.0198117	0	0	0	0	0	0	0	0	0	0	0	0	0	0	0	0	0	0.02483	0.00497529	0	0	0	0.14454	0	0	0	0.07305	0	0	0	0.00247	0	0	0	0	0
k__Bacteria|p__Firmicutes|c__Bacilli|o__Lactobacillales|f__Lactobacillaceae|g__Lactobacillus|s__Lactobacillus_vaginalis	0	0	0	0	0	0	0	0	0	0	0	0	0	0	0	0	0	0	0	0	0	0	0	0	0	0	0	0	0	0	0	0	0	0	0	0	0	0	0	0	0	0	0	0	0	0	0	0	0
k__Bacteria|p__Firmicutes|c__Bacilli|o__Lactobacillales|f__Leuconostocaceae|g__Leuconostoc|s__Leuconostoc_citreum	0	0	0	0	0	0	0	0	0.00122	0	0	0	0	0	0	0	0	0	0	0	0	0	0	0	0	0	0	0	0	0	0	0	0	0	0	0	0	0	0	0	0.0100123	0	0	0	0	0	0	0	0
k__Bacteria|p__Firmicutes|c__Bacilli|o__Lactobacillales|f__Leuconostocaceae|g__Leuconostoc|s__Leuconostoc_lactis	0	0	0	0	0	0	0	0	0	0	0	0	0	0.000990004	0.01886	0	0	0	0	0	0	0	0	0.0252681	0	0	0	0	0.0174716	0.05181	0	0	0	0	0	0.00815	0	0	0	0	0	0	0	0	0	0	0	0	0
k__Bacteria|p__Firmicutes|c__Bacilli|o__Lactobacillales|f__Leuconostocaceae|g__Leuconostoc|s__Leuconostoc_pseudomesenteroides	0	0	0	0	0	0	0	0	0.0017	0	0	0	0	0	0	0	0	0	0	0	0	0	0	0	0	0	0	0	0	0	0	0	0	0	0	0	0	0	0	0	0	0	0	0	0	0	0	0	0
k__Bacteria|p__Firmicutes|c__Bacilli|o__Lactobacillales|f__Leuconostocaceae|g__Leuconostoc|s__Leuconostoc_unclassified	0	0	0	0	0	0	0	0	0	0	0	0	0	0	0.00737	0	0	0	0	0	0	0	0	0.0040313	0	0	0	0	0	0	0	0	0	0	0.00378	0	0	0	0	0	0	0	0	0	0	0	0	0	0
k__Bacteria|p__Firmicutes|c__Bacilli|o__Lactobacillales|f__Leuconostocaceae|g__Weissella|s__Weissella_cibaria	0	0	0	0.0426274	0	0	0	0	0.00027	0	0	0	0	0	0.00022	0	0	0	0	0	0	0	0	0.0115437	0	0	0.17898	0	0	0.00749	0.03789	0	0	0	0	0	0	0	0	0	0	0	0	0	0	0	0	0	0
k__Bacteria|p__Firmicutes|c__Bacilli|o__Lactobacillales|f__Leuconostocaceae|g__Weissella|s__Weissella_confusa	0	0	0.00273007	0.419505	0	0	0	0	0.01878	0	0	0	0	0.0254501	0.03605	0	0.0126	0	0	0	0	0	0	0.68409	0	0	0.11258	0	0.281882	0	0.00067	0	0	0.00591322	0	0	0	0	0	0.00334	0	0	0	0	0	0	0	0	0
k__Bacteria|p__Firmicutes|c__Bacilli|o__Lactobacillales|f__Leuconostocaceae|g__Weissella|s__Weissella_unclassified	0	0	0	0	0	0	0	0	0.02345	0	0	0	0	0	0	0	0.00685	0	0	0	0	0	0	0	0	0	0	0	0.0294201	0	0.00162	0	0	0	0	0	0	0	0	0.00235	0	0	0	0	0	0	0	0	0
k__Bacteria|p__Firmicutes|c__Bacilli|o__Lactobacillales|f__Streptococcaceae|g__Lactococcus|s__Lactococcus_garvieae	0	0.00747616	0	0	0	0	0	0	0	0	0	0	0	0.0911704	0.06271	0	0	0	0	0.0710633	0	0	0	0	0	0	0	0	0	0	0	0	0	0	0	0	0	0	0	0	0	0	0	0	0	0	0	0	0
k__Bacteria|p__Firmicutes|c__Bacilli|o__Lactobacillales|f__Streptococcaceae|g__Lactococcus|s__Lactococcus_lactis	0	0	0	0.182546	0	0	0	0	0.01379	0	0	0	0	0	0.02981	0	0	0	0	0	0	0	0	0	0	0	0	0	0	0	0	0	0	0	0	0	0	0	0	0	0	0	0	0	0	0	0	0	0
k__Bacteria|p__Firmicutes|c__Bacilli|o__Lactobacillales|f__Streptococcaceae|g__Streptococcus|s__Streptococcus_anginosus	0	0.0404791	0	0	0	0	0	0	0	0	0	0	0	0	0	0	0	0	0.00132	0	0	0	0	0	0	0	0.00114	0	0	0	0	0	0	0	0	0	0	0	0	0.00061	0.000210047	0	0	0	0	0	0	0	0
k__Bacteria|p__Firmicutes|c__Bacilli|o__Lactobacillales|f__Streptococcaceae|g__Streptococcus|s__Streptococcus_australis	0.0424261	0	0.0291907	0.00757462	0.0533831	0	0	0.0245231	0	0.0034	0	0.03571	0.0752964	0.0215101	0.00277	0.0176702	0.01799	0	0.01091	0.0107816	0.01472	0	0	0.0270387	0.00581	0.00219	0.01926	0.004567	0.0141738	0.01043	0.03568	0.0031576	0	0	0.06697	0	0.00515	0.01251	0.00859	0	0	0.0095	0	0	0.00851994	0.0262	0.00166	0	0
k__Bacteria|p__Firmicutes|c__Bacilli|o__Lactobacillales|f__Streptococcaceae|g__Streptococcus|s__Streptococcus_constellatus	0	0	0	0	0	0	0	0	0	0	0	0	0	0	0	0.00198002	0	0	0	0	0	0	0	0	0	0	0	0	0	0	0	0	0	0	0	0	0	0	0	0	0	0	0	0	0	0	0	0	0
k__Bacteria|p__Firmicutes|c__Bacilli|o__Lactobacillales|f__Streptococcaceae|g__Streptococcus|s__Streptococcus_cristatus	0	0	0	0	0.00309424	0	0	0	0	0	0	0	0	0	0	0	0	0	0	0	0	0	0	0.00138044	0	0	0.01992	0	0	0	0	0	0	0	0	0	0	0	0	0	0	0	0	0	0	0	0	0	0
k__Bacteria|p__Firmicutes|c__Bacilli|o__Lactobacillales|f__Streptococcaceae|g__Streptococcus|s__Streptococcus_downei	0	0	0	0	0	0	0	0	0	0	0	0	0	0	0	0	0	0	0	0	0	0	0	0	0	0	0	0	0	0	0	0	0	0	0	0	0	0	0	0	0	0	0	0	0	0	0	0	0
k__Bacteria|p__Firmicutes|c__Bacilli|o__Lactobacillales|f__Streptococcaceae|g__Streptococcus|s__Streptococcus_gordonii	0	0	0	0	0.0105144	0	0	0	0	0	0	0	0	0	0	0.00237003	0	0	0	0	0	0.00116	0.00040025	0	0	0	0.01785	0	0	0.00195	0	0	0	0	0.03315	0	0	0.00647	0	0	0.00339076	0	0	0	0	0	0	0	0.00355
k__Bacteria|p__Firmicutes|c__Bacilli|o__Lactobacillales|f__Streptococcaceae|g__Streptococcus|s__Streptococcus_infantarius	0	0	0	0	0	0	0	0	0	0	0	0	0	0.00159001	0	0	0	0	0	0	0	0	0.0115372	0.722933	0	0	0	0	0.282173	0	0	0	0	0	0.0067	0	0	0	0	0	0	0	0	0	0	0	0	0	0
k__Bacteria|p__Firmicutes|c__Bacilli|o__Lactobacillales|f__Streptococcaceae|g__Streptococcus|s__Streptococcus_infantis	0	0	0	0.00775593	0.0650491	0	0.00078	0.00267033	0	0.00669	0	0.01223	0.00759817	0.0103	0	0	0	0	0	0	0	0	0	0.0152649	0.00286	0	0.01811	0	0	0.04668	0.0056	0	0	0	0.0055	0	0	0	0.00235	0.00127	0	0	0.0178411	0	0	0	0	0	0
k__Bacteria|p__Firmicutes|c__Bacilli|o__Lactobacillales|f__Streptococcaceae|g__Streptococcus|s__Streptococcus_intermedius	0	0	0	0	0	0	0	0	0	0	0	0	0	0	0	0	0	0	0	0	0	0	0	0	0	0	0	0	0	0	0	0	0	0	0	0	0	0	0	0.00042	0	0	0	0	0	0	0	0	0
k__Bacteria|p__Firmicutes|c__Bacilli|o__Lactobacillales|f__Streptococcaceae|g__Streptococcus|s__Streptococcus_lutetiensis	0	0	0	0	0.00138189	0	0	0	0	0	0	0	0	0	0	0	0	0	0	0	0	0	0	0	0	0	0	0	0	0	0	0	0	0	0	0	0	0	0	0	0	0	0	0	0	0	0.0004	0	0
k__Bacteria|p__Firmicutes|c__Bacilli|o__Lactobacillales|f__Streptococcaceae|g__Streptococcus|s__Streptococcus_macedonicus	0	0	0	0	0	0	0	0	0	0	0	0	0	0	0	0	0	0	0	0	0	0	0	0	0	0	0	0	0	0	0	0	0	0	0	0	0	0	0	0	0	0	0	0	0	0	0.01384	0	0
k__Bacteria|p__Firmicutes|c__Bacilli|o__Lactobacillales|f__Streptococcaceae|g__Streptococcus|s__Streptococcus_mitis_oralis_pneumoniae	0	0	0.00117003	0.0365939	0.115949	0	0.00475	0	0	0.06535	0	0.02094	0.0951686	0.01197	0	0.0175002	0	0	0	0.00118991	0.03781	0.00378	0	0.0917595	0	0	0.04297	0	0.0264731	0.07107	0.03241	0.00229549	0.05887	0	0.02228	0	0	0	0.01956	0.01454	0	0	0	0	0.00158227	0.00121	0	0	0.00967
k__Bacteria|p__Firmicutes|c__Bacilli|o__Lactobacillales|f__Streptococcaceae|g__Streptococcus|s__Streptococcus_mutans	0	0	0	0	0	0	0	0	0	0	0	0	0	0	0	0	0	0	0	0	0	0	0	0	0	0	0	0	0	0	0	0	0	0	0	0	0	0	0	0	0	0	0	0	0	0	0	0	0
k__Bacteria|p__Firmicutes|c__Bacilli|o__Lactobacillales|f__Streptococcaceae|g__Streptococcus|s__Streptococcus_oligofermentans	0	0	0	0	0	0	0	0	0	0	0	0	0	0	0	0	0	0	0	0	0.00559	0	0	0.0129742	0	0	0.00168	0	0	0	0	0	0	0	0	0	0	0	0	0	0	0	0	0	0	0	0	0	0
k__Bacteria|p__Firmicutes|c__Bacilli|o__Lactobacillales|f__Streptococcaceae|g__Streptococcus|s__Streptococcus_parasanguinis	0.0228941	0	0.000440011	0.43135	0.465347	0.03021	0.0055	0.0156519	0.00598	0.08845	0.03647	0.0909	0.0491261	0.0606602	0.02173	0.00754009	0	0.06019	0	0	0	0.0279	0.0656211	0.0113537	0.0317	0	0.76044	0.00458703	0.00609453	0.19839	0.00265	0	0.53888	0.192871	0.24347	0	0.00659	0	0	0.01375	0.0186042	0.0195	0.0190512	0	0	0	0.02012	0.16232	0.06504
k__Bacteria|p__Firmicutes|c__Bacilli|o__Lactobacillales|f__Streptococcaceae|g__Streptococcus|s__Streptococcus_pasteurianus	0	0	0	0	0.0191662	0	0	0	0	0	0	0	0.0849201	0	0	0	0	0	0	0	0	0	0	0	0	0	0	0	0	0	0	0	0	0	0	0	0	0	0	0	0	0	0	0	0	0	0.12445	0	0
k__Bacteria|p__Firmicutes|c__Bacilli|o__Lactobacillales|f__Streptococcaceae|g__Streptococcus|s__Streptococcus_pseudopneumoniae	0	0	0	0	0	0	0	0	0	0.00133	0	0	0.00937175	0	0	0	0	0	0	0	0	0	0	0	0	0	0	0	0	0	0	0	0	0	0	0	0	0	0	0	0	0	0	0	0	0	0	0	0
k__Bacteria|p__Firmicutes|c__Bacilli|o__Lactobacillales|f__Streptococcaceae|g__Streptococcus|s__Streptococcus_salivarius	0.0165902	0.0555584	0.0489312	2.29304	0.683907	0.14687	0.01251	0.0303238	0.05157	0.39551	0.0317	0.14138	0.961793	0.663243	0.36532	0.00746009	0.00623	0.0298	0.37544	0.0600541	0.00092	0.01672	0.236678	0.0720132	0.08108	0.01526	0.2753	0.000831274	0.018023	0.107	0.02981	0.272945	0	0	1.04166	0.02948	0	0	0.03455	0.15685	0	0.06815	0	0.01511	0.0439487	0	0.14241	0.16951	0.07431
k__Bacteria|p__Firmicutes|c__Bacilli|o__Lactobacillales|f__Streptococcaceae|g__Streptococcus|s__Streptococcus_sanguinis	0.00149092	0	0	0.00681917	0.119554	0	0	0.00529066	0	0.00743	0	0.00274	0.0198117	0.00991004	0	0	0.00069	0	0	0.00188316	0	0	0.0109669	0.149348	0	0	0.02123	0	0.0463705	0.00505	0.00413	0.00156841	0	0	0.01113	0	0	0.00054	0	0.0078	0	0	0	0	0	0.00228	0.00698	0.01491	0
k__Bacteria|p__Firmicutes|c__Bacilli|o__Lactobacillales|f__Streptococcaceae|g__Streptococcus|s__Streptococcus_sobrinus	0	0	0	0	0	0	0	0	0	0	0	0	0	0	0	0	0	0	0	0	0	0	0	0	0	0	0	0	0	0	0	0	0	0	0	0	0	0	0	0	0.0522918	0	0	0	0	0	0	0	0.01512
k__Bacteria|p__Firmicutes|c__Bacilli|o__Lactobacillales|f__Streptococcaceae|g__Streptococcus|s__Streptococcus_thermophilus	0.0241349	0	0	0	0	0	0	0	0	0	0	0	0.111836	0	0	0	0	0	0	0	0	0	0	0	0.0257	0	0.00612	0	0	0.64412	0.01427	0	0	0	0.1232	0	0	0	0	0	0	0	0	0	0	0	0.64928	0	0
k__Bacteria|p__Firmicutes|c__Bacilli|o__Lactobacillales|f__Streptococcaceae|g__Streptococcus|s__Streptococcus_tigurinus	0	0	0	0	0	0	0	0	0	0.00141	0	0	0.00318438	0	0	0	0	0	0	0	0	0	0	0	0	0	0	0	0	0.01243	0	0	0	0	0	0	0	0	0.00102	0	0	0	0	0	0	0	0	0	0
k__Bacteria|p__Firmicutes|c__Bacilli|o__Lactobacillales|f__Streptococcaceae|g__Streptococcus|s__Streptococcus_vestibularis	0	0	0	0.0118555	0.0150406	0	0	0	0	0.01922	0	0	0	0.0165901	0	0	0	0	0	0	0	0	0.0105066	0	0	0	0.00729	0	0	0	0	0	0	0	0.01381	0	0	0	0	0	0	0	0	0	0.00385426	0	0	0	0
k__Bacteria|p__Firmicutes|c__Clostridia|o__Clostridiales|f__Clostridiaceae|g__Butyricicoccus|s__Butyricicoccus_pullicaecorum	0	0	0	0	0	0	0	0	0	0	0	0	0	0	0	0	0	0	0	0	0	0	0	0	0	0	0	0	0	0	0	0	0	0	0	0	0	0	0	0	0	0	0	0	0	0	0	0	0
k__Bacteria|p__Firmicutes|c__Clostridia|o__Clostridiales|f__Clostridiaceae|g__Clostridiaceae_noname|s__Clostridiaceae_bacterium_JC118	0.00364224	0	0	0	0	0	0	0.00617077	0	0	0	0	0	0	0	0	0	0	0	0	0	0	0	0	0	0	0	0	0	0	0	0	0	0.00224502	0	0	0	0	0	0	0	0.01992	0	0	0	0.32369	0	0	0
k__Bacteria|p__Firmicutes|c__Clostridia|o__Clostridiales|f__Clostridiaceae|g__Clostridium|s__Clostridium_asparagiforme	0.00756466	0.00334154	0	0	0	0.01141	0	0.0548168	0	0	0.1108	0	0	0	0.00589	0	0	0.00391	0	0.0125923	0	0	0	0	0	0.00376	0	0.00483741	0	0	0.03024	0.111347	0	0.0063943	0.00105	0	0.14477	0	0	0	0	0.36026	0.629501	0.15555	0.205371	0	0	0	0.03289
k__Bacteria|p__Firmicutes|c__Clostridia|o__Clostridiales|f__Clostridiaceae|g__Clostridium|s__Clostridium_bolteae	0.102113	0	0	0	0	0.0801	0.00182	0.0144518	0	0.01419	0.02774	0.00587	0.0143599	0	0.0057	0	0.12274	0	0	0	0.00055	0.00242	0	0.0121739	0.01267	0	0.06436	0.00160246	0.0105151	0.68664	0.00707	0	0	0.0133699	0.00089	0.00447	0.3789	6.44847	0.0454	0.02102	0	0.11806	1.46197	0.39844	0.0290388	0	0.5874	0.16717	0.01999
k__Bacteria|p__Firmicutes|c__Clostridia|o__Clostridiales|f__Clostridiaceae|g__Clostridium|s__Clostridium_butyricum	0	0	0	0	0	0	0	0	0	0	0	0	0	0	0	0	0	0	0	0	0	0	0	0	0	0	0	0	0	0	0	0	0	0	0	0	0	0	0	0	0	0	0	0	0	0	0	0	0
k__Bacteria|p__Firmicutes|c__Clostridia|o__Clostridiales|f__Clostridiaceae|g__Clostridium|s__Clostridium_celatum	0	0	0	0	0	0	0	0	0	0	0	0	0	0	0	0	0	0	0	0	0	0	0	0	0	0	0	0	0	0	0	0	0	0	0	0	0.00395	0	0	0	0	0	0.673273	0	0	0	0	0	0
k__Bacteria|p__Firmicutes|c__Clostridia|o__Clostridiales|f__Clostridiaceae|g__Clostridium|s__Clostridium_citroniae	0.00597368	0.00168134	0.00122003	0	0	0.00132	0.00372	0.0210426	0	0	0.00917	0	0	0	0	0	0.04045	0	0	0.0202698	0	0	0	0	0.00974	0.0115	0.00033	0.00151232	0	0	0.01433	0	0	0	0	0.00572	0.03155	0	0	0	0	0.11374	0.116718	0.02711	0.0548928	0	0.03352	0.10644	0.02895
k__Bacteria|p__Firmicutes|c__Clostridia|o__Clostridiales|f__Clostridiaceae|g__Clostridium|s__Clostridium_clostridioforme	0	0	0	0	0	0.0007	0	0	0	0	0	0	0	0	0	0	0.00146	0	0	0	0	0	0	0	0.00612	0	0	0	0	0	0.00351	0	0	0	0	0	0	0	0.00021	0	0	0.091	0	0	0.00579153	0	0.03511	0.20214	0
k__Bacteria|p__Firmicutes|c__Clostridia|o__Clostridiales|f__Clostridiaceae|g__Clostridium|s__Clostridium_hathewayi	0	0.00129009	0	0	0.356558	0.0009	0	0.000730091	0	0.00614	0.00264	0	0	0	0.15222	0	0.02151	0	0	0.00269022	0	0	0	0	0	0	0	0	0	0	0.01343	0.112967	0	0	0.00401	0	0.04609	0.41922	0.00987	0.05379	0	0.73338	0.410976	0.11124	0.116723	0	0.02581	0.67175	0.01953
k__Bacteria|p__Firmicutes|c__Clostridia|o__Clostridiales|f__Clostridiaceae|g__Clostridium|s__Clostridium_leptum	2.21719	2.16396	0.181425	0	0.176572	0	0.00224	0.015882	0.01643	0	0.00594	0.11908	0.00838419	0.00305001	0.14678	0	0	0.00028	0	0.00546323	0	0	0	0	0	0.01416	0	0.00677037	0	0	0.0209	0	0	0	1.26087	0	0.00293	0	0.02503	0	0	0	0	0	0.00832723	0	0	0	0.09077
k__Bacteria|p__Firmicutes|c__Clostridia|o__Clostridiales|f__Clostridiaceae|g__Clostridium|s__Clostridium_methylpentosum	0	0	0	0	0	0	0	0	0	0	0	0	0	0	0	0	0	0	0	0	0	0	0	0	0	0	0	0	0	0	0	0	0	0	0	0	0	0.01753	0	0	0	0	0	0	0	0	0	0	0.00626
k__Bacteria|p__Firmicutes|c__Clostridia|o__Clostridiales|f__Clostridiaceae|g__Clostridium|s__Clostridium_nexile	0	0	0	0	0	0.50783	0	0	0	0	0	0	0.22856	0	0.03234	0.000220003	0	0	0	0	0	0	0	0	0	0	0	0.0249282	0	0	0	0	0	0	0	0	0.609	0	0.21638	0.00635	0	0	0	0.11197	0.016553	0	0	0.00146	0
k__Bacteria|p__Firmicutes|c__Clostridia|o__Clostridiales|f__Clostridiaceae|g__Clostridium|s__Clostridium_perfringens	0	0	0	0	0	0	0	0	0	0	0	0	0	0	0	0	0	0.01018	0	0	0	0	0	0	0	0	0	0	0	0	0	0	0	0	0	0	0	0	0	0	0	0	0	0	0	0	0	0	0
k__Bacteria|p__Firmicutes|c__Clostridia|o__Clostridiales|f__Clostridiaceae|g__Clostridium|s__Clostridium_sp_7_2_43FAA	0	0	0	0	0	0	0	0	0	0	0	0	0	0	0	0	0	0	0	0	0	0	0	0	0	0	0	0	0	0	0	0	0	0	0	0	0	0	0	0	0	0	0	0	0	0	0	0	0
k__Bacteria|p__Firmicutes|c__Clostridia|o__Clostridiales|f__Clostridiaceae|g__Clostridium|s__Clostridium_sp_L2_50	0	3.96282	6.51194	0	0	0	0	0	0	0	0	0	0	0	0	0	0	0.32708	0	1.35323	0	0	0	0	0	0	0	6.85552	0	0	0	0	0	0	0	0	0	0	0	0	0	0	0	0	0	0	0	0	1.03116
k__Bacteria|p__Firmicutes|c__Clostridia|o__Clostridiales|f__Clostridiaceae|g__Clostridium|s__Clostridium_symbiosum	0.000950585	0	0	0	0.0254949	0	0	0	0	0	0.01632	0	0	0	0.00057	0	0.06167	0	0	0	0	0	0	0	0	0	0	0	0	0	0	0	0	0	0	0.02024	0	0	0	0.03423	0	0.07824	0.119348	0.026	0.0614754	0.18485	0.38763	0	0
k__Bacteria|p__Firmicutes|c__Clostridia|o__Clostridiales|f__Clostridiales_Family_XI_Incertae_Sedis|g__Anaerococcus|s__Anaerococcus_vaginalis	0	0	0	0	0	0	0	0	0	0	0	0	0	0	0	0	0	0	0	0	0	0	0	0	0	0	0	0	0	0	0	0	0	0	0	0	0	0	0	0	0	0	0	0	0	0	0	0	0
k__Bacteria|p__Firmicutes|c__Clostridia|o__Clostridiales|f__Clostridiales_Family_XI_Incertae_Sedis|g__Clostridiales_Family_XI_Incertae_Sedis_noname|s__Clostridiales_bacterium_BV3C26	0	0	0	0	0	0	0	0	0	0	0	0	0	0	0	0	0	0	0	0	0	0	0	0	0	0	0	0	0	0	0	0	0	0	0	0	0	0	0	0	0	0	0	0	0	0	0	0	0
k__Bacteria|p__Firmicutes|c__Clostridia|o__Clostridiales|f__Clostridiales_Family_XI_Incertae_Sedis|g__Finegoldia|s__Finegoldia_magna	0	0	0	0	0	0	0	0	0	0	0	0	0	0	0	0	0	0	0	0	0	0	0	0	0	0	0	0	0	0	0	0	0	0	0	0	0	0	0	0	0	0	0	0	0	0	0	0	0
k__Bacteria|p__Firmicutes|c__Clostridia|o__Clostridiales|f__Clostridiales_Family_XI_Incertae_Sedis|g__Parvimonas|s__Parvimonas_micra	0	0.0346737	0	0	0	0	0	0	0	0	0	0	0	0	0	0	0	0	0	0	0	0	0	0	0	0	0	0	0	0	0	0	0	0	0	0	0	0	0	0	0	0	0	0	0	0	0	0	0
k__Bacteria|p__Firmicutes|c__Clostridia|o__Clostridiales|f__Clostridiales_Family_XI_Incertae_Sedis|g__Parvimonas|s__Parvimonas_unclassified	0	0.0756076	0	0	0	0	0	0	0	0	0	0	0	0	0	0.00343004	0	0	0	0.000713944	0	0	0	0	0	0	0	0	0	0	0	0	0	0	0	0	0	0	0	0	0	0	0	0	0	0	0	0	0
k__Bacteria|p__Firmicutes|c__Clostridia|o__Clostridiales|f__Clostridiales_Family_XI_Incertae_Sedis|g__Peptoniphilus|s__Peptoniphilus_lacrimalis	0	0.00863936	0	0	0	0	0	0	0	0	0	0	0	0	0	0	0	0	0	0	0	0	0	0	0	0	0	0	0	0	0	0	0	0	0	0	0	0	0	0	0	0	0	0	0	0	0	0	0
k__Bacteria|p__Firmicutes|c__Clostridia|o__Clostridiales|f__Clostridiales_Family_XIII_Incertae_Sedis|g__Clostridiales_Family_XIII_Incertae_Sedis_noname|s__Eubacterium_infirmum	0	0	0	0	0.00573786	0	0	0	0	0	0	0	0	0.00205001	0	0	0.00463	0	0	0	0	0	0	0	0	0	0	0	0	0	0	0	0	0	0	0	0	0	0	0	0	0	0	0	0	0	0	0	0
k__Bacteria|p__Firmicutes|c__Clostridia|o__Clostridiales|f__Clostridiales_noname|g__Clostridiales_noname|s__Clostridiales_bacterium_1_7_47FAA	0.00107066	0	0	0	0.00229314	0	0	0	0	0	0.01869	0	0	0	0	0	0.00122	0	0	0	0	0	0	0	0.00187	0.00172	0	0	0	0	0.00021	0	0	0	0	0	0	0.00384	0	0	0	0.02678	0.00169011	0.00371	0.0687478	0	0.00413	0	0.00997
k__Bacteria|p__Firmicutes|c__Clostridia|o__Clostridiales|f__Clostridiales_noname|g__Flavonifractor|s__Flavonifractor_plautii	0.0249454	0	0	0	0	0.01904	0	0.016122	0	0	0.03717	0.00326	0	0.000270001	0.00298	0.00145002	0.16216	0.00285	0	0	0	0	0	0.00568183	0	0.05673	0.00769	0	0.0099437	0.04072	0.00694	0.00290831	0	0.055915	0	0	0.00353	0	0.05913	0	0	0.10681	0.108677	0.37864	0.0485941	0.02846	0.07795	0.00415	0.03731
k__Bacteria|p__Firmicutes|c__Clostridia|o__Clostridiales|f__Clostridiales_noname|g__Pseudoflavonifractor|s__Pseudoflavonifractor_capillosus	0	0	0	0	0	0	0	0	0	0	0	0	0	0	0	0	0	0	0	0	0	0	0	0	0	0	0	0	0	0	0	0.0101791	0	0	0	0	0	0	0	0	0	0	0.00229015	0	0	0	0	0.00085	0
k__Bacteria|p__Firmicutes|c__Clostridia|o__Clostridiales|f__Eubacteriaceae|g__Anaerofustis|s__Anaerofustis_stercorihominis	0	0	0	0	0	0	0	0	0	0	0	0	0	0	0	0	0	0	0	0	0	0	0	0	0	0	0	0	0	0	0	0	0	0	0	0	0	0	0	0	0	0	0	0	0	0	0	0	0
k__Bacteria|p__Firmicutes|c__Clostridia|o__Clostridiales|f__Eubacteriaceae|g__Eubacterium|s__Eubacterium_brachy	0	0	0	0	0	0	0	0	0	0	0	0	0	0	0	0	0	0	0	0	0	0	0	0	0	0	0	0	0	0	0	0	0	0	0	0	0	0	0	0	0	0	0	0	0	0	0	0	0
k__Bacteria|p__Firmicutes|c__Clostridia|o__Clostridiales|f__Eubacteriaceae|g__Eubacterium|s__Eubacterium_eligens	0.00745459	0.86531	21.5069	4.81137	5.38028	0.92324	6.26771	1.65995	0.74011	0.27152	3.33003	0.89611	0.102172	0.391582	0.01061	0.0355504	0.00571	1.73255	0.30499	11.0065	0.00601	0.0382	1.30018	0.460158	0	0.62293	0.15775	0	0.491942	0	0.19468	2.34042	0	0	0.00554	0.749	0	0	0.28698	0	0	0	0	0.4004	0.026706	0	0	0	0.13031
k__Bacteria|p__Firmicutes|c__Clostridia|o__Clostridiales|f__Eubacteriaceae|g__Eubacterium|s__Eubacterium_hallii	0.000150092	0.0991041	0.00368009	0.0503229	0.0797392	0.00396	0	0.0124315	0	0	0.0177	0.05037	0	0	0.05034	0.00177002	0.00305	0.00589	0.00275	0.0252364	0.02745	0.00586	0.0165404	0.0246379	0.02097	0.01599	0.0016	0.00687053	0.0315953	0	0	0.0209814	0	0.0839477	0.01211	0.01416	0.00388	0	0.02535	0	0.0508715	0.01729	0	0.06409	0.040632	0.1042	0	0	0.02417
k__Bacteria|p__Firmicutes|c__Clostridia|o__Clostridiales|f__Eubacteriaceae|g__Eubacterium|s__Eubacterium_limosum	0	0	0	0	0	0	0	0	0	0	0	0	0	0	0	0	0	0	0	0	0	0	0	0	0	0	0	0	0	0	0	0	0	0	0	0	0	0	0	0	0	0	0	0	0	0	0	0	0
k__Bacteria|p__Firmicutes|c__Clostridia|o__Clostridiales|f__Eubacteriaceae|g__Eubacterium|s__Eubacterium_ramulus	0.0479895	0.164211	0.0688717	0.0637497	0.0307521	0	0.06331	0	0.00972	0.0544	0.25144	0.05118	0.0464254	0.0130701	0.01057	0.0333704	0.0061	0.06537	0	0	0.16987	0.03384	0.0245053	0	0.13411	0	0	0.000470721	0	0	0.05707	0.0159542	0	0.00761703	0.04599	0.00099	0.00019	0	0.02657	0	0	0.02994	0	0.04713	0.00669424	0	0	0	0.04601
k__Bacteria|p__Firmicutes|c__Clostridia|o__Clostridiales|f__Eubacteriaceae|g__Eubacterium|s__Eubacterium_rectale	1.14011	0.155043	16.7595	31.4298	0.475391	0.01107	0	4.28763	2.23274	1.62832	0.22543	9.82528	0	6.26075	0.01845	3.1817	0	9.91926	0.07063	5.51484	26.2847	13.014	8.44276	0.235076	15.0594	12.3242	5.32076	6.35999	0.231141	0.05642	0.00505	0.109155	0	4.49533	0.74373	1.5674	0	0	0.47695	0	5.15203	0	0	0	5.7448	0	0.48234	0	0.74059
k__Bacteria|p__Firmicutes|c__Clostridia|o__Clostridiales|f__Eubacteriaceae|g__Eubacterium|s__Eubacterium_siraeum	0.0288978	4.35786	0	0.276897	0	0	0.03273	0	0.01195	0	0.14527	0	0	0.0327401	0.09066	0	0	0	0	0	0	0.70951	0.000610382	0	0	0	0	13.9889	0	0	0	0.210396	0	0.0525976	0	0	0	0	0	0	0	0	0.0599639	0	0	0	0	0	0
k__Bacteria|p__Firmicutes|c__Clostridia|o__Clostridiales|f__Eubacteriaceae|g__Eubacterium|s__Eubacterium_sp_3_1_31	0	0	0	0	0	0	0	0	0	0	0	0	0	0	0	0	0	0	0	0	0	0	0	0	0	0	0	0	0	0	0	0	0	0	0	0	0	0	0.00114	0	0	0	0	0	0	0.00957	0	0.18211	0
k__Bacteria|p__Firmicutes|c__Clostridia|o__Clostridiales|f__Eubacteriaceae|g__Eubacterium|s__Eubacterium_ventriosum	0.0287677	0.21058	0.00944024	0.0128728	0	0	0.0159	0.0213327	0	0.01913	0.06686	0.05094	0	0	0.00512	0	0	0.00858	0	0.156261	0.02287	0.01424	0.0348718	0	0.08035	0.01176	0	0.00028043	0	0	0	0.0282626	0	0.0137808	0.00476	0.02178	0	0	0.07474	0	0	0	0	0	0.0148389	0.19232	0	0	0
k__Bacteria|p__Firmicutes|c__Clostridia|o__Clostridiales|f__Lachnospiraceae|g__Anaerostipes|s__Anaerostipes_caccae	0	0	0	0	0	0	0	0	0	0	0	0	0	0	0	0	0	0	0	0	0	0	0	0	0	0	0	0	0	0	0	0	0	0	0	0	0	0	0	0	0.0449701	0.00613	0	0	0	0	0	0	0
k__Bacteria|p__Firmicutes|c__Clostridia|o__Clostridiales|f__Lachnospiraceae|g__Anaerostipes|s__Anaerostipes_hadrus	0	0.0177969	0.0227806	0.00564067	0.0174038	0.01286	0	0.000660082	0	0	0.01831	0	0.0729585	0	0.00604	0	0	0	0	0	0	0	0	0	0.00254	0.00054	0.06636	0	0.00260621	0.01728	0.0033	0	0	0.0091705	0	0.00399	0	0	0	0	0	0.06275	0	0.01214	0	0	0.09871	0	0
k__Bacteria|p__Firmicutes|c__Clostridia|o__Clostridiales|f__Lachnospiraceae|g__Anaerostipes|s__Anaerostipes_unclassified	0	0	0	0	0	0	0	0	0	0	0	0	0	0	0	0	0	0	0	0	0	0	0	0	0	0	0	0	0	0	0	0	0	0	0	0	0	0	0	0	0.0192843	0	0	0	0	0	0	0	0
k__Bacteria|p__Firmicutes|c__Clostridia|o__Clostridiales|f__Lachnospiraceae|g__Blautia|s__Blautia_hansenii	0	0	0	0	0	0.00335	0	0	0	0	0	0	0	0	0	0	0	0	0	0	0	0	0	0	0	0	0	0	0	0	0	0	0	0	0	0	0	0	0	0	0	0	0	0	0	0	0	0	0
k__Bacteria|p__Firmicutes|c__Clostridia|o__Clostridiales|f__Lachnospiraceae|g__Blautia|s__Blautia_hydrogenotrophica	0	0	0	0	0	0	0	0	0	0	0	0	0	0	0	0	0	0	0	0	0	0	0	0	0	0	0	0	0	0	0	0	0	0	0	0	0	0	0	0	0	0	0.0103307	0	0	0	0	0	0
k__Bacteria|p__Firmicutes|c__Clostridia|o__Clostridiales|f__Lachnospiraceae|g__Blautia|s__Blautia_producta	0	0	0	0	0	0	0	0	0	0	0	0	0	0	0	0	0	0	0	0	0	0	0	0	0	0	0	0	0	0	0	0	0	0	0	0	0	0	0	0	0	0	0	0	0	0	0.02135	0	0
k__Bacteria|p__Firmicutes|c__Clostridia|o__Clostridiales|f__Lachnospiraceae|g__Blautia|s__Ruminococcus_gnavus	0	0	0	0.364317	0.236874	3.8278	0	0.228628	0	0.57386	0	0	0.383425	0	0.12411	0.162532	0.23486	0	0	0	0.04882	0	0	0	0.10928	0	0.76671	0	0	6.28931	0.20862	0	0	0.678327	0	0	1.20109	0	0.80842	1.51051	0	0.73493	12.0057	0.61082	0.00753609	0	17.4685	7.49169	0.05825
k__Bacteria|p__Firmicutes|c__Clostridia|o__Clostridiales|f__Lachnospiraceae|g__Blautia|s__Ruminococcus_obeum	0.0880042	0.435457	0.161624	0.108805	0.254679	0.00713	0.054	0.594904	0.09412	0.03962	0.4212	0.33006	0.209101	0.0302201	0.35727	0.0183102	0.16286	0.0851	0.03662	0.314353	0.39514	0.13303	0.123427	0.131792	0.06373	0.05845	0.19996	0.092001	0.109351	0.07795	0.14286	0.356601	0	0.126302	0.04961	0.03036	0.04118	0	0.04027	0.00577	0.0250757	0.17373	0	0.04621	0.163451	0.01454	0.09025	0	0.12148
k__Bacteria|p__Firmicutes|c__Clostridia|o__Clostridiales|f__Lachnospiraceae|g__Blautia|s__Ruminococcus_torques	2.4503	0.528735	0.558394	0.162582	1.07444	0.33803	0.33496	1.6235	0.17461	0.77742	1.1898	1.43293	0.708312	0.677043	0.64928	0.143022	0.73809	0.34385	0.12508	0.647382	4.18687	0.13699	0.0610582	0.234956	0.45887	0.10544	0.27287	0.527148	0.446504	2.92626	0.17696	2.79988	0	0	0.69537	0.08838	0.08657	0	0.09688	0.03737	0.157516	1.89786	0.0867256	6.65638	0.235982	2.95191	5.42995	0.10319	2.21233
k__Bacteria|p__Firmicutes|c__Clostridia|o__Clostridiales|f__Lachnospiraceae|g__Butyrivibrio|s__Butyrivibrio_unclassified	0	0	0	0	0	0	0	0	0	0	0	0	0	0	0	0	0	0	0	0	0	0	0	0	0	0	0	0	0	0	0	0	0	0	0	0	0	0	0	0	0	0	0	0	0	0	0	0	0
k__Bacteria|p__Firmicutes|c__Clostridia|o__Clostridiales|f__Lachnospiraceae|g__Coprococcus|s__Coprococcus_catus	0.0202525	0.203464	0.0751019	0.10407	0.124831	0.01124	0.05681	0.0419152	0.03109	0.01948	0.31138	0.1988	0.0591932	0.0804203	0.04266	0	0.15761	0.04049	0	0.18098	0.58751	0.14905	0.0729957	0.103823	0.00623	0.00618	0	0.0644888	0.111636	0	0.25554	0.109716	0	0.00113253	0.04047	0.08489	0	0	0.03133	0	0	0.09542	0	0	0.0255903	0.01628	0.24457	0	0.07871
k__Bacteria|p__Firmicutes|c__Clostridia|o__Clostridiales|f__Lachnospiraceae|g__Coprococcus|s__Coprococcus_comes	0.123406	0.933452	0.627616	0.685412	0.259575	0	0.77486	1.7839	0.35007	1.83422	0	0.41388	0	0.724563	0.22991	0.113821	0.67579	0.43204	0.66989	0.662644	2.07413	1.65164	0.211432	0	0.27501	0.4781	0	0.462278	0	0	0.57407	0.360859	0	0.224392	0.26189	0.0763	0.06147	0	0.20757	0	2.8495	0.49599	0	0	0.274738	0.13147	0.26726	0	0.06576
k__Bacteria|p__Firmicutes|c__Clostridia|o__Clostridiales|f__Lachnospiraceae|g__Coprococcus|s__Coprococcus_eutactus	0	0	0	0	0	0	0	0	0	0	0	0	0	0	0.0005	0	0	0	0	0	0	0	0	0	0	0	0	0	0	0	0	0	0	0	0	0	0	0	0	0	0	0	0	0	1.81384	0	0	0	0
k__Bacteria|p__Firmicutes|c__Clostridia|o__Clostridiales|f__Lachnospiraceae|g__Coprococcus|s__Coprococcus_sp_ART55_1	0	1.23732	0	0.464912	1.74715	0	1.07212	0	0	0	0	1.09812	0	0.377642	30.2963	0	0	8.73082	0	6.95122	0	0	0	0	0	5.61215	0	0.508139	0	0	0	0	0	0	0	0	0	0	0	0	0	0	0	0	0	0	0	0	1.66171
k__Bacteria|p__Firmicutes|c__Clostridia|o__Clostridiales|f__Lachnospiraceae|g__Dorea|s__Dorea_formicigenerans	0.0430965	0.353558	0.229366	0.14279	0.0839149	0	0.04542	0.0181523	0.02966	0.08781	0.51406	0.37935	1.16132	0.0515002	0.19763	0.0158702	0.05224	0.05414	0.07083	0.0891189	0.49182	0.02662	0.0596773	0.107124	0.04577	0.02272	0.15613	0.162799	0.123825	0	0.07652	0.307492	0	0.153403	0.04429	0.01119	0	0	0.00844	0	0	0	0	0	0.0597005	0.05885	0.62588	0	0.08124
k__Bacteria|p__Firmicutes|c__Clostridia|o__Clostridiales|f__Lachnospiraceae|g__Dorea|s__Dorea_longicatena	0.339719	0.537131	0.142834	0.505263	0.032144	0	0.06385	0.334292	0.76613	0.04164	0.03763	0.18098	0.124423	0.128261	0.08079	0.0567207	0.0583	0.07445	0.06885	0.081938	0.63353	0.06733	0.0822114	0.0120039	0.02139	0.04282	0.19145	0.106683	0.0170306	0.25824	0.14232	0.382505	0	0.418435	0.10948	0.01126	0.00713	0	0.03269	0	0	0.38667	0	0	0.199965	0.05047	0.3589	0	0.15693
k__Bacteria|p__Firmicutes|c__Clostridia|o__Clostridiales|f__Lachnospiraceae|g__Dorea|s__Dorea_unclassified	0	0	0	0	0	0.00539	0	0	0	0	0	0	0	0	0	0	0	0	0	0.0242741	0	0	0	0.134963	0	0	0	0	0.0509214	0	0	0	0	0	0	0.00224	0.00019	0	0.05559	0	0.0721663	0	0	0	0	0	0	0	0
k__Bacteria|p__Firmicutes|c__Clostridia|o__Clostridiales|f__Lachnospiraceae|g__Lachnospiraceae_noname|s__Lachnospiraceae_bacterium_1_1_57FAA	0.258599	1.04627	0.485102	0.229807	0	0.04459	1.5296	2.14623	0.01167	0.11395	0.50905	0	0.0268153	0.147041	1.11574	0.154372	0.14605	0.13918	0	0	0.11711	0	0	0.0871781	0.04466	0.01996	0.43779	0.289754	0.50757	0	0	0.132443	0	0	0.26127	0.02647	0.25697	0	0.04108	0	0	0	0	0	0	0	0.0637	0	0.33333
k__Bacteria|p__Firmicutes|c__Clostridia|o__Clostridiales|f__Lachnospiraceae|g__Lachnospiraceae_noname|s__Lachnospiraceae_bacterium_1_4_56FAA	0	0	0	0	0	0.00211	0	0	0	0.01019	0	0	0	0	0	0	0.0345	0	0	0	0.00287	0	0	0.00674217	0.02641	0	0.01336	0	0.0109661	0.30603	0	0	0	0	0	0	0	0	0.00204	0	0	0.11713	0	0	0	0	0.25468	0	0
k__Bacteria|p__Firmicutes|c__Clostridia|o__Clostridiales|f__Lachnospiraceae|g__Lachnospiraceae_noname|s__Lachnospiraceae_bacterium_2_1_46FAA	0	0	0	0	0	0	0	0	0	0	0	0	0	0	0	0	0	0	0	0	0	0	0	0	0	0	0	0	0	0.04707	0	0	0	0	0	0	0	0	0	0	0	0	0	0	0	0	0	0	0
k__Bacteria|p__Firmicutes|c__Clostridia|o__Clostridiales|f__Lachnospiraceae|g__Lachnospiraceae_noname|s__Lachnospiraceae_bacterium_2_1_58FAA	0.000820505	0.0293654	0	0.0613222	0	0	0	0	0	0	0	0	0	0.00987004	0	0.0330704	0.10687	0	0	0	0	0	0	0	0	0	0	0.034603	0	0.00529	0.08928	0	0	0.0638327	0	0.00184	0.00136	0	0.33371	0.00582	0	0.00598	0.689414	0	0.00141999	0	0.44759	0.05201	0.01981
k__Bacteria|p__Firmicutes|c__Clostridia|o__Clostridiales|f__Lachnospiraceae|g__Lachnospiraceae_noname|s__Lachnospiraceae_bacterium_3_1_46FAA	0.0212231	0.00308775	0.079432	0.00148068	0.139972	0.00815	0.65774	0.0819302	0	0	1.08076	0.11275	0.0176552	0	0.01014	0.00249003	0.01411	0.30559	0	2.28953	0.00196	0.29972	0	0.832338	0.19475	0	0.00076	0	0.954144	0	0.0432	0.126543	0	0	0	0.00147	0.00662	0	0.0262	0	0	0	0	0.15146	0	0.0979	0	0	0.19968
k__Bacteria|p__Firmicutes|c__Clostridia|o__Clostridiales|f__Lachnospiraceae|g__Lachnospiraceae_noname|s__Lachnospiraceae_bacterium_3_1_57FAA_CT1	0.000550339	0	0	0	0.00515706	0.0029	0	0	0	0	0.01083	0.07795	0	0	0.01202	0	0.001	0	0	0.0195041	0	0	0	0	0	0	0	0	0	0	0	0	0	0	0	0	0	0.99789	0	0	0	0.01689	0	0	0.0728962	0	0	0	0.00507
k__Bacteria|p__Firmicutes|c__Clostridia|o__Clostridiales|f__Lachnospiraceae|g__Lachnospiraceae_noname|s__Lachnospiraceae_bacterium_4_1_37FAA	0	0	0	0	0	0.00264	0	0	0	0	0	0	0	0	0	0	0	0	0	0	0	0	0	0	0	0	0	0	0	0.00576	0	0	0	0	0	0	0	0	0	0	0	0	0	0	0	0	0	0	0
k__Bacteria|p__Firmicutes|c__Clostridia|o__Clostridiales|f__Lachnospiraceae|g__Lachnospiraceae_noname|s__Lachnospiraceae_bacterium_5_1_57FAA	0	0	0	0	0	0	0	0	0	0	0	0	0	0	0	0	0	0	0	0	0	0	0	0	0	0	0	0	0	0	0	0	0	0.00270605	0	0	0	0	0	0	0	0	0	0	0	0	0.006	0	0
k__Bacteria|p__Firmicutes|c__Clostridia|o__Clostridiales|f__Lachnospiraceae|g__Lachnospiraceae_noname|s__Lachnospiraceae_bacterium_5_1_63FAA	0	0.0461259	0.00159004	0.0443095	0.0184753	0.06751	0.00668	0.00316039	0	0.00175	0.06087	0	0.0122135	0	0.10906	0	0.00801	0.00068	0.00098	0.0107712	0.01637	0	0	0.00168054	0.00507	0	0.03468	0.00475729	0.0013833	0.02995	0.02192	0	0	0.00130291	0	0.00394	0	0	0.00846	0	0	0.01417	0	0.00566	0	0	0.03787	0	0
k__Bacteria|p__Firmicutes|c__Clostridia|o__Clostridiales|f__Lachnospiraceae|g__Lachnospiraceae_noname|s__Lachnospiraceae_bacterium_6_1_63FAA	0	0	0	0	0	0.0027	0	0	0	0	0	0	0	0	0	0	0	0	0	0	0	0	0	0	0	0	0	0	0	0	0	0	0	0	0	0	0	0	0	0	0	0	0	0	0	0	0	0.33656	0
k__Bacteria|p__Firmicutes|c__Clostridia|o__Clostridiales|f__Lachnospiraceae|g__Lachnospiraceae_noname|s__Lachnospiraceae_bacterium_7_1_58FAA	0.0128679	0.0494675	0.00852021	0	0	0	0	0.0185923	0	0	0.02946	0.0031	0.000292237	0	0.01923	0.00354004	0.10373	0	0	0	0.01103	0.00186	0	0.0133643	0.0021	0.04315	0	0	0.0147752	0.00268	0.00937	0.00389506	0	0.0252765	0.0012	0	0	0	0.01236	0	0	0.11516	0.0473731	0.57968	0	0	0.086	0	0.02386
k__Bacteria|p__Firmicutes|c__Clostridia|o__Clostridiales|f__Lachnospiraceae|g__Lachnospiraceae_noname|s__Lachnospiraceae_bacterium_8_1_57FAA	0	0	0	1.64991	0	0	0	0	0	0	0	0	0	0	0	0.0221103	0	0	0.00945	0	0	0.13588	0	0	0	0.35857	0	0	0	0	0	0	0	0	0	0.01113	0.05725	0	0	0	0	0	0	0	0.462968	0	0	0	0
k__Bacteria|p__Firmicutes|c__Clostridia|o__Clostridiales|f__Lachnospiraceae|g__Lachnospiraceae_noname|s__Lachnospiraceae_bacterium_9_1_43BFAA	0	0	0	0	0	0.01891	0	0	0	0	0	0	0	0	0	0	0	0	0	0	0	0	0	0	0	0	0	0	0	0.0314	0	0	0	0	0	0	0	0	0	0	0	0	0	0	0	0	0	0	0
k__Bacteria|p__Firmicutes|c__Clostridia|o__Clostridiales|f__Lachnospiraceae|g__Lachnospiraceae_noname|s__Lachnospiraceae_bacterium_ICM7	0	0	0	0	0.0070797	0	0	0	0	0	0	0	0	0.00477002	0	0	0	0	0	0	0	0	0	0	0	0	0	0	0	0	0	0	0	0	0	0	0	0	0	0	0	0	0	0	0	0	0	0	0
k__Bacteria|p__Firmicutes|c__Clostridia|o__Clostridiales|f__Lachnospiraceae|g__Lachnospiraceae_noname|s__Lachnospiraceae_bacterium_oral_taxon_082	0	0	0	0	0.00952304	0	0	0	0	0	0	0	0	0	0	0	0	0	0	0	0	0	0	0	0	0	0	0	0	0	0	0	0	0	0	0	0	0	0	0	0	0	0	0	0	0	0	0	0
k__Bacteria|p__Firmicutes|c__Clostridia|o__Clostridiales|f__Lachnospiraceae|g__Oribacterium|s__Oribacterium_sinus	0	0	0	0	0.0451518	0	0	0	0	0	0	0	0.00177358	0.0492502	0	0	0	0	0	0	0	0	0	0	0	0	0	0	0	0	0	0	0	0	0.01168	0	0	0	0	0	0	0	0	0	0	0	0	0	0
k__Bacteria|p__Firmicutes|c__Clostridia|o__Clostridiales|f__Lachnospiraceae|g__Roseburia|s__Roseburia_hominis	0.0249354	0.758371	1.60875	0.0350729	0.01458	0.03304	1.27695	0	0.55289	0.00942	1.28583	0.57163	0.0072757	0.0225301	0.00418	0	0.03628	0.13461	0	2.04474	0.6139	0.0147	0.0749669	0.0325005	0.09084	0.19781	0.10396	0.0328203	0.0392836	0	0.34465	0.414944	0	0	0.01233	0.1738	0	0	0.06169	0	0	0	0	0	0.776339	0	0	0	0.3847
k__Bacteria|p__Firmicutes|c__Clostridia|o__Clostridiales|f__Lachnospiraceae|g__Roseburia|s__Roseburia_intestinalis	0.0479895	0.0509585	3.58851	0.366644	21.9699	0	3.06531	0.183253	0	0	0.35954	0.39962	6.98462	0.134281	0	0.980881	11.3376	2.28734	0.02057	0	0.12725	0.65227	0.0158599	18.0363	0	0.59353	27.7072	6.25223	17.0941	9.86752	2.87013	0.474782	0	0	0	0.96525	0.09609	0	0.24768	0	0	0.42279	0	1.84372	0.103325	0	0	0	3.32937
k__Bacteria|p__Firmicutes|c__Clostridia|o__Clostridiales|f__Lachnospiraceae|g__Roseburia|s__Roseburia_inulinivorans	0.95802	1.07448	0.485842	1.63417	2.39332	0.10752	0.3032	0.155219	0.88506	0.64306	0.35265	0.49134	3.35168	3.06582	2.09942	0	0.01335	1.56149	0.00834	2.34668	5.84251	1.65353	0.873957	10.9785	1.51363	0.32445	3.39295	1.67647	11.1131	0	3.82765	1.68968	0	0	3.10472	0.18681	0.00808	0	1.36442	0	0	0	0	0	0.223851	0	0	0	2.28098
k__Bacteria|p__Firmicutes|c__Clostridia|o__Clostridiales|f__Lachnospiraceae|g__Roseburia|s__Roseburia_unclassified	0	0	0	0	0	0.59311	0	0.200985	0	0	0	0	0	0	0	0	0	0	0.07801	0	0	0	0	0	0	0	0	0	0	0	0	0	0	0.0492	0	0	0.00839	0	0	0.00012	0	0	0	0	0	0	0.14745	0	0
k__Bacteria|p__Firmicutes|c__Clostridia|o__Clostridiales|f__Lachnospiraceae|g__Stomatobaculum|s__Stomatobaculum_longum	0	0	0	0.00184329	0.100858	0	0	0	0	0	0	0	0	0.0152101	0	0	0	0	0	0	0	0	0	0	0	0	0.00298	0	0	0	0	0	0	0	0	0	0	0	0	0	0	0	0	0	0	0	0	0	0
k__Bacteria|p__Firmicutes|c__Clostridia|o__Clostridiales|f__Oscillospiraceae|g__Oscillibacter|s__Oscillibacter_sp_KLE_1745	0	0	0	0	0	0	0	0	0	0	0	0	0	0	0	0	0	0	0	0	0	0	0	0	0	0	0	0	0	0	0	0	0	0	0	0	0	0	0	0	0	0	0	0	0	0	0	0	0
k__Bacteria|p__Firmicutes|c__Clostridia|o__Clostridiales|f__Oscillospiraceae|g__Oscillibacter|s__Oscillibacter_unclassified	0.52061	0.422504	0.204535	0.0390012	0.128286	0.00618	0.15859	0.367186	0.03691	0.00387	1.69795	0.17779	0.044934	0.132331	0.24346	0	0.0009	0.02031	0.00819	0.186753	0.00857	0.02116	0.00187117	0.224802	0.09218	1.33012	0.06576	0.0518695	0.173223	0.01988	0.91564	0.153164	0	0	0.087	0.13119	0.13366	0	0.21183	0	0.000600135	0	3.77661	9.19906	0.0109846	0.29255	0	0	0.31536
k__Bacteria|p__Firmicutes|c__Clostridia|o__Clostridiales|f__Peptostreptococcaceae|g__Peptostreptococcaceae_noname|s__Clostridium_bartlettii	0	0.00270707	0	0	0	0.0002	0	0	0	0	0	0.02355	0	0	0.01585	0	0	0	0	0.00144858	0	0	0.00603378	0	0	0	0	0.0249983	0	0	0.00634	0.00963898	0.01618	0	0	0	0.02198	0.04973	0.00183	0.12593	0	0.00074	0.280668	0.01988	0	0.00406	0	0	0
k__Bacteria|p__Firmicutes|c__Clostridia|o__Clostridiales|f__Peptostreptococcaceae|g__Peptostreptococcaceae_noname|s__Clostridium_difficile	0	0	0	0	0	0	0	0	0	0	0	0	0	0	0	0	0	0	0	0	0	0	0	0	0	0	0	0	0	0	0	0	0.21864	0	0	0	0	0	0	0	0	0	0	0	0	0	0	0	0
k__Bacteria|p__Firmicutes|c__Clostridia|o__Clostridiales|f__Peptostreptococcaceae|g__Peptostreptococcaceae_noname|s__Peptostreptococcaceae_noname_unclassified	0.0135283	0	0.0169104	0.27882	0	0	0.048	0	0	0.59594	0	0	0.0517461	0	0	0.00807009	0.01528	0	0	0.065538	0.34839	0	0.100113	0.109415	0	0	0.03663	0	0.153366	0	0.00412	0	0	0	0	0.02439	0	0	0.47083	0	0	0.01071	0	0	0	0	0	0	0
k__Bacteria|p__Firmicutes|c__Clostridia|o__Clostridiales|f__Peptostreptococcaceae|g__Peptostreptococcus|s__Peptostreptococcus_stomatis	0	0.0066725	0	0	0	0	0	0	0	0	0	0	0	0.000190001	0	0	0	0	0	0	0	0	0	0	0	0	0	0	0	0	0	0	0	0	0	0	0	0	0	0	0	0	0	0	0	0	0	0	0
k__Bacteria|p__Firmicutes|c__Clostridia|o__Clostridiales|f__Peptostreptococcaceae|g__Peptostreptococcus|s__Peptostreptococcus_unclassified	0	0	0	0	0.0104543	0	0	0	0	0	0	0	0	0.00173001	0	0	0	0	0	0	0	0	0	0	0	0	0	0	0	0	0	0	0	0	0	0	0	0	0	0	0	0	0	0	0	0	0	0	0
k__Bacteria|p__Firmicutes|c__Clostridia|o__Clostridiales|f__Ruminococcaceae|g__Anaerotruncus|s__Anaerotruncus_colihominis	0.00781481	0	0	0	0	0	0	0.00892111	0	0	0.07427	0.03937	0	0.000800003	0.02624	0	0	0	0	0.00214183	0	0	0	0	0	0.08161	0.0037	0	0	0	0.00776	0.0206802	0	0	0.00284	0	0	0	0.00091	0	0	0.04201	0	0.68875	0	0	0	0	0.08962
k__Bacteria|p__Firmicutes|c__Clostridia|o__Clostridiales|f__Ruminococcaceae|g__Anaerotruncus|s__Anaerotruncus_unclassified	0.00336207	0	0	0	0	0	0	0.0116915	0	0	0	0	0	0	0	0	0	0	0	0.0117335	0.01196	0.0163	0	0	0	0.00392	0	0	0	0	0	0	0	0	0.00568	0	0	0	0	0	0	0	0.0139209	0	0.017689	0	0	0	0
k__Bacteria|p__Firmicutes|c__Clostridia|o__Clostridiales|f__Ruminococcaceae|g__Faecalibacterium|s__Faecalibacterium_prausnitzii	8.77381	13.6623	6.0909	3.61709	10.0563	0.90662	2.10051	3.3817	4.02072	2.46304	7.0509	3.83151	1.59763	5.11675	3.03914	0.422975	11.3359	3.06704	2.21366	7.14503	9.79342	5.5796	1.59373	5.09967	4.06799	13.7731	6.14761	6.87073	5.2048	0.55658	9.17189	7.27638	10.2643	4.01978	5.17462	2.95171	2.89903	0	12.738	2.05227	11.8107	5.84172	10.0759	1.68261	0.0177296	0.20265	2.31862	14.3747	1.57762
k__Bacteria|p__Firmicutes|c__Clostridia|o__Clostridiales|f__Ruminococcaceae|g__Ruminococcaceae_noname|s__Ruminococcaceae_bacterium_D16	0	0	0	0	0	0.08937	0	0.00186023	0	0	0.18745	0	0	0	0	0	0	0	0	0	0	0	0	0	0	0	0.02859	0	0	0	0	0	0	0	0	0	0	0	0	0	0	0	0.0120208	0.00208	0	0	0	0	0
k__Bacteria|p__Firmicutes|c__Clostridia|o__Clostridiales|f__Ruminococcaceae|g__Ruminococcus|s__Ruminococcus_albus	0	0	0.00135003	0	0	0	0	0.000180022	0	0	0	0	0	0	0	0	0	0	0	0.00146928	0	0	0	0	0.00092	0.00087	0	0	0	0	0	0.00180731	0	0	0	0	0	0	0	0	0	0	0	0	0	0	0	0	0
k__Bacteria|p__Firmicutes|c__Clostridia|o__Clostridiales|f__Ruminococcaceae|g__Ruminococcus|s__Ruminococcus_bromii	22.4428	0.792124	2.19863	0.0772672	1.79583	0	1.63455	1.53333	0	0	0.79549	2.00202	0.00590521	1.78456	0.98436	0	0	0.11944	0	3.59418	0.76635	0.50937	0.0312896	0	1.49465	0.1331	1.44398	0	0	0	0	0.00211891	0	0	0	0.0033	0.82606	0	0.6373	0	0	0	0	4.87896	0.434487	1.00878	0	0	0.46528
k__Bacteria|p__Firmicutes|c__Clostridia|o__Clostridiales|f__Ruminococcaceae|g__Ruminococcus|s__Ruminococcus_callidus	0	0.291126	0.0972324	0	0.0253347	0	0	0.0180022	0.04545	0	0.00278	0.12372	0.039452	0.00495002	0.00828	0	0	0.24266	0.0012	0.678061	0	0	0.234707	0.00298096	0	0	0.03108	0.0192395	0.00524249	0	0	1.20055	0	2.82943	0.75709	0	0.08999	0	0	0	0	0	0	0	0.00080128	0	0	0	0
k__Bacteria|p__Firmicutes|c__Clostridia|o__Clostridiales|f__Ruminococcaceae|g__Ruminococcus|s__Ruminococcus_champanellensis	0	0	0	0	0	0	0	0	0	0	0	0	0	0	0	0	0	0	0	0	0	0	0	0	0	0	0	0	0	0	0	0	0	0	0	0	0	0	0	0	0	0	0	0	0.00786066	0	0	0	0
k__Bacteria|p__Firmicutes|c__Clostridia|o__Clostridiales|f__Ruminococcaceae|g__Ruminococcus|s__Ruminococcus_flavefaciens	0	0	0	0	0	0	0	0	0	0	0	0	0	0	0	0	0	0	0	0	0	0	0	0	0.00045	0	0	0.0129198	0	0	0.00079	0	0	0	0	0	0	0	0	0	0	0	0	0	0	0	0	0	0
k__Bacteria|p__Firmicutes|c__Clostridia|o__Clostridiales|f__Ruminococcaceae|g__Ruminococcus|s__Ruminococcus_lactaris	0	0.134698	0	0.534041	0.90574	0	2.00256	0.747383	0	0	0	0	0	1.63081	0.13431	0	0	0.11805	0	0	0	0.73831	0.238419	0	0	0	0	0	0	0	0.25788	0	0	0	0.78871	0	0	0	0	0	0	0	0	0	0	0	0	0	0
k__Bacteria|p__Firmicutes|c__Clostridia|o__Clostridiales|f__Ruminococcaceae|g__Ruminococcus|s__Ruminococcus_sp_5_1_39BFAA	0	0.718505	0	0.337292	0	0	0	0.583043	0	0	0	0	0.545677	0	0.46065	0	0	0	0	0	0	0	0	0	0.16126	0	0.64601	0	0	0	0	0	0	0	0	0	0	0	0	0	0	0	0	0	0	0	0	0	0
k__Bacteria|p__Firmicutes|c__Clostridia|o__Clostridiales|f__Ruminococcaceae|g__Subdoligranulum|s__Subdoligranulum_sp_4_3_54A2FAA	0	0	0	0	0	0	0	0.15666	0	0	0	0	0	0	0	0	0	0	0	0	0	0	0	0	0	0	0	0	0	0	0	2.43557	0	0	0	0	0	0	0	0	0	0	0	0	0	0	0	0	0
k__Bacteria|p__Firmicutes|c__Clostridia|o__Clostridiales|f__Ruminococcaceae|g__Subdoligranulum|s__Subdoligranulum_unclassified	1.25072	3.91245	7.75725	1.06699	0.623354	0.42152	6.30768	1.42702	1.50418	0.03551	2.21091	1.2021	0.27298	0.873153	2.69456	0.489076	1.17574	1.99984	0.23395	5.4016	1.38396	2.52894	0.824506	0.83759	1.20602	4.06904	0.6753	1.94732	0.600451	0.02654	23.487	23.063	0.01671	1.96308	4.51853	4.902	0.11567	0.0057	0.36058	0.17283	0.00231052	11.9954	1.03393	1.94425	3.32437	0.59589	1.36975	0	3.28929
k__Bacteria|p__Firmicutes|c__Clostridia|o__Clostridiales|f__Ruminococcaceae|g__Subdoligranulum|s__Subdoligranulum_variabile	0	0	0.00258006	0	0	0	0	0	0	0	0	0	0	0	0	0	0	0	0	0	0	0	0	0	0	0	0	0	0	0	0	0	0	0	0	0	0	0	0	0	0	0	0	0	0	0.00658	0	0	0
k__Bacteria|p__Firmicutes|c__Erysipelotrichia|o__Erysipelotrichales|f__Erysipelotrichaceae|g__Bulleidia|s__Bulleidia_extructa	0	0	0	0	0	0	0	0	0	0	0	0	0	0	0	0	0	0	0	0	0	0	0	0	0	0	0	0	0	0	0	0	0	0	0	0	0	0	0	0.00038	0	0	0	0	0	0	0	0	0
k__Bacteria|p__Firmicutes|c__Erysipelotrichia|o__Erysipelotrichales|f__Erysipelotrichaceae|g__Catenibacterium|s__Catenibacterium_mitsuokai	0	0	0.120073	0	0	0	0	0	0	0	0	0	0	0	0	0	0	0	0	0	0	0	0.224881	0	0	0	0	0	0	0	0	0.232592	0	0.0820033	0	0	0	0	0	0	0	0	0	0	0	0	0	0	0
k__Bacteria|p__Firmicutes|c__Erysipelotrichia|o__Erysipelotrichales|f__Erysipelotrichaceae|g__Coprobacillus|s__Coprobacillus_sp_29_1	0	0	0	0	0	0	0	0	0	0	0	0	0	0	0	0	0	0	0	0	0	0	0	0	0	0	0	0	0	0	0	0	0	0	0	0	0	0	0	0	0	0	0	0	0	0	0	0	0
k__Bacteria|p__Firmicutes|c__Erysipelotrichia|o__Erysipelotrichales|f__Erysipelotrichaceae|g__Coprobacillus|s__Coprobacillus_unclassified	0.00918565	0	0	0	0	0.0484	0	0	0	0	0	0	0	0	0	0	0	0	0.00405	0	0	0	0	0	0	0	0	0	0	0.01612	0	0	4.95503	0.037103	0	0	0	0.29267	0.01811	0.40956	0.0414794	0.12989	0	0.0134	0	0.00068	0	0.85971	0
k__Bacteria|p__Firmicutes|c__Erysipelotrichia|o__Erysipelotrichales|f__Erysipelotrichaceae|g__Erysipelotrichaceae_noname|s__Clostridium_innocuum	0	0	0	0	0.00246337	0	0	0	0	0	0	0.01329	0	0	0	0	0	0	0	0	0	0	0	0	0	0	0	0	0	0	0	0	0	0	0	0	0	0.00487	0	0.00387	0	0	0	0	0	0	0.00184	0	0
k__Bacteria|p__Firmicutes|c__Erysipelotrichia|o__Erysipelotrichales|f__Erysipelotrichaceae|g__Erysipelotrichaceae_noname|s__Clostridium_ramosum	0	0	0	0	0	0.00556	0	0	0	0	0	0	0	0	0	0	0	0	0	0	0	0	0	0	0	0	0	0	0	0.00278	0	0	1.91722	0	0	0	0	0.13079	0.00102	0.12559	0.0057513	0.03048	0	0	0	0	0	0.40585	0
k__Bacteria|p__Firmicutes|c__Erysipelotrichia|o__Erysipelotrichales|f__Erysipelotrichaceae|g__Erysipelotrichaceae_noname|s__Erysipelotrichaceae_bacterium_2_2_44A	0	0	0	0	0.0256952	0	0	0	0	0	0	0.00771	0	0	0	0	0	0	0	0	0	0	0	0	0	0	0	0	0	0	0	0	0.156	0	0	0	0	0.00566	0	0.00184	0	0	0.00380024	0	0	0	0.00336	0	0
k__Bacteria|p__Firmicutes|c__Erysipelotrichia|o__Erysipelotrichales|f__Erysipelotrichaceae|g__Erysipelotrichaceae_noname|s__Erysipelotrichaceae_bacterium_21_3	0.00281173	0	0	0	0	0	0	0.00271034	0	0.0003	0	0	0	0	0	0	0	0	0	0	0	0	0	0	0	0	0	0	0	0.0026	0	0	0	0	0	0	0	0.00365	0	0.08662	0.008852	0	0.0907458	0	0	0	0	0.00144	0
k__Bacteria|p__Firmicutes|c__Erysipelotrichia|o__Erysipelotrichales|f__Erysipelotrichaceae|g__Erysipelotrichaceae_noname|s__Erysipelotrichaceae_bacterium_3_1_53	0	0	0	0	0	0	0	0	0	0	0	0	0	0	0	0	0	0	0	0	0	0	0	0	0	0	0	0	0	0	0	0	0	0	0	0	0	0.03168	0	0	0.0332475	0.00484	0	0	0	0.03503	0	0.99524	0
k__Bacteria|p__Firmicutes|c__Erysipelotrichia|o__Erysipelotrichales|f__Erysipelotrichaceae|g__Erysipelotrichaceae_noname|s__Erysipelotrichaceae_bacterium_5_2_54FAA	0	0	0	0	0	0	0	0	0	0	0	0	0	0	0	0	0	0	0	0	0	0	0	0	0	0	0	0	0	0	0	0	0	0	0	0	0	0	0	0	0	0	0	0	0	0	0	0	0
k__Bacteria|p__Firmicutes|c__Erysipelotrichia|o__Erysipelotrichales|f__Erysipelotrichaceae|g__Erysipelotrichaceae_noname|s__Erysipelotrichaceae_bacterium_6_1_45	0.00222137	0.00270707	0	0	0	0	0	0	0	0	0	0	0	0	0	0	0	0	0	0	0	0	0	0	0	0	0	0	0	0	0	0	0	0	0	0	0	0.00829	0	0.25884	0	0	0.0105007	0.01472	0	0	0	0.00107	0
k__Bacteria|p__Firmicutes|c__Erysipelotrichia|o__Erysipelotrichales|f__Erysipelotrichaceae|g__Erysipelotrichaceae_noname|s__Eubacterium_biforme	0	6.63673	0	0.237956	0	0	0	2.13028	0	0	0	0	0	0.269621	0	0	0	0	0	0	0	0	0.542019	0	0	0	0	0	0	0	0	0.226828	0	0.546141	0.21706	0	0	0	0	0	0	0	0	0	0	1.33065	0	0	0
k__Bacteria|p__Firmicutes|c__Erysipelotrichia|o__Erysipelotrichales|f__Erysipelotrichaceae|g__Erysipelotrichaceae_noname|s__Eubacterium_dolichum	0	0	0	0.000241743	0	0.00456	0	0.00122015	0	0.03502	0	0	0.00215651	0	0	0	0.01636	0	0	0	0	0	0	0	0	0	0	0	0	0	0	0	0	0	0	0	0	0	0	0	0	0	0	0.05538	0	0	0	0	0
k__Bacteria|p__Firmicutes|c__Erysipelotrichia|o__Erysipelotrichales|f__Erysipelotrichaceae|g__Holdemania|s__Holdemania_filiformis	0	0	0	0.0022462	0	0.04671	0.01889	0.00777097	0	0.00694	0.12431	0	0	0	0.01567	0	0.13272	0.00088	0.02333	0.0656001	0	0	0	0	0	0	0.00383	0.0029345	0	0.00938	0.02067	0.071503	0	0.104724	0	0	0	0	0.00686	0	0	0	0	0	0	0.03007	0	0	0.06893
k__Bacteria|p__Firmicutes|c__Erysipelotrichia|o__Erysipelotrichales|f__Erysipelotrichaceae|g__Holdemania|s__Holdemania_sp_AP2	0	0	0	0	0	0	0	0	0	0	0	0	0	0	0	0	0	0	0	0	0	0	0	0	0	0	0	0	0	0	0	0	0	0	0	0	0	0	0	0	0	0	0	0	0.150661	0	0	0	0
k__Bacteria|p__Firmicutes|c__Erysipelotrichia|o__Erysipelotrichales|f__Erysipelotrichaceae|g__Holdemania|s__Holdemania_unclassified	0.000790487	0.0393582	0.00846021	0	0.00232318	0	0	0.0279035	0.00031	0	0	0.00233	0	0.0125001	0.02369	0	0	0.01081	0	0	0	0.00481	0	0	0.01404	0.10008	0.00275	0.0173967	0.00137327	0	0.04523	0	0	0	0.00052	0.00745	0	0	0.01411	0	0	0	0	0	0	0.03242	0	0	0.00398
k__Bacteria|p__Firmicutes|c__Erysipelotrichia|o__Erysipelotrichales|f__Erysipelotrichaceae|g__Solobacterium|s__Solobacterium_moorei	0	0.00854419	0	0.00166198	0.0481059	0	0	0.00146018	0	0	0	0.01867	0	0.0253001	0.00062	0.0088201	0	0	0	0	0	0.00283	0.000890557	0	0	0	0.00548	0.00143219	0.00207495	0.01178	0	0.00266942	0.01762	0	0.00126	0	0	0	0.00034	0.00779	0	0	0	0	0	0.00437	0	0	0
k__Bacteria|p__Firmicutes|c__Erysipelotrichia|o__Erysipelotrichales|f__Erysipelotrichaceae|g__Turicibacter|s__Turicibacter_sanguinis	0	0	0	0	0	0	0	0	0	0	0	0.00095	0	0	0	0	0	0	0	0	0.01747	0	0	0	0	0	0	0.0255492	0	0	0	0	0	0	0	0	0	0	0	0	0	0	0	0	0	0	0	0	0
k__Bacteria|p__Firmicutes|c__Erysipelotrichia|o__Erysipelotrichales|f__Erysipelotrichaceae|g__Turicibacter|s__Turicibacter_unclassified	0	0	0	0	0	0	0	0	0	0	0	0	0	0	0	0	0	0	0.00145	0	0.03492	0	0	0	0	0	0	0.0686652	0	0	0	0	0	0	0	0	0	0	0	0	0	0	0	0	0	0	0	0	0
k__Bacteria|p__Firmicutes|c__Negativicutes|o__Selenomonadales|f__Acidaminococcaceae|g__Acidaminococcus|s__Acidaminococcus_fermentans	0	0	0	0	0	0	0	0	0	0	0	0	0	0	0	0	0	0	0	0	0	0	0	0	0	0	0	0	0	0	0	0	0	0	0	0	0	0	0	0	0	0	0	0	0	0	0	0	0
k__Bacteria|p__Firmicutes|c__Negativicutes|o__Selenomonadales|f__Acidaminococcaceae|g__Acidaminococcus|s__Acidaminococcus_intestini	0	0	0	0	0	0.00521	0	0	0	0	0	0	0	0	0	0	0	0	0	0	0	0	0	0	0	0	0	0	0	0.0016	0	0	0	0	0	0	0	0	0	0	0	0	0	0	0	0	0	0	0
k__Bacteria|p__Firmicutes|c__Negativicutes|o__Selenomonadales|f__Acidaminococcaceae|g__Acidaminococcus|s__Acidaminococcus_unclassified	0	0	0	0	0	0	0	0.918084	0	0	0	0	0	0	0	0	0	0	0	0	0	0	0	0	0	0	0	0	0	0	0	0	0	0	0	0	0	0	0	0	0	0	0	0	0	0	0	0	0
k__Bacteria|p__Firmicutes|c__Negativicutes|o__Selenomonadales|f__Acidaminococcaceae|g__Phascolarctobacterium|s__Phascolarctobacterium_succinatutens	0	0	0	0	0	0	0	0	0	0	4.84476	0	0	0	0	0	0	0	0	0	0	0	0	0	0	0	0	0	0	0	0	5.55937	0	10.158	0	0	0	0	0	0	0	0	0	0	0	0	0	0	0
k__Bacteria|p__Firmicutes|c__Negativicutes|o__Selenomonadales|f__Veillonellaceae|g__Anaeroglobus|s__Anaeroglobus_geminatus	0	0	0	0	0	0	0	0	0	0	0	0	0	0	0	0	0	0	0	0	0	0	0	0	0	0	0	0	0	0	0	0	0	0	0	0	0	0	0	0	0	0	0	0	0	0	0	0	0
k__Bacteria|p__Firmicutes|c__Negativicutes|o__Selenomonadales|f__Veillonellaceae|g__Dialister|s__Dialister_invisus	0	0	0	0	0	0	0	0	0	0	0	0	0	0	0.02836	0.000390005	0	0	0	4.96546	0	7.42907	0	0	0	3.81063	0	0.0695566	0	0	0	0	0	0	0.00133	0	0	0	1.21022	0	0	0	0	0	0	0	0	0	0.00172
k__Bacteria|p__Firmicutes|c__Negativicutes|o__Selenomonadales|f__Veillonellaceae|g__Dialister|s__Dialister_succinatiphilus	0	0	0	0	0	0	0	0	4.60061	0	0	0	0	0	0	0	0	0	0.94849	0	0	0	0	0	0	0	0	0	0	0	0	0	0	0	0	0	0	0	0	0	0	0	0	0	0.841963	0	0	0	0
k__Bacteria|p__Firmicutes|c__Negativicutes|o__Selenomonadales|f__Veillonellaceae|g__Megamonas|s__Megamonas_funiformis	2.02163	0	0	0.447064	0	0	0.20517	0	0.40425	1.37227	0	0.91888	0	0.422382	0	0.276363	0	0.01327	0	0	1.04874	0	0.0326404	0.442372	0	0	0	0.520938	0.420893	0	0	0	0	0	0	0	0	0	0	1.79773	0	0	0	0	0.171393	0	0	0	0
k__Bacteria|p__Firmicutes|c__Negativicutes|o__Selenomonadales|f__Veillonellaceae|g__Megamonas|s__Megamonas_hypermegale	1.07093	0	0	0.66703	0	0	3.08042	4.79507	0.29002	0.17534	0	4.09648	0	0.147871	0	4.89845	0	0.69865	0	0	0.04666	0	0.242071	0.996841	0.77814	0	0	0.00664018	1.24065	0	0	0	0	0	2.5483	0	3.50689	0	0	8.66707	0	0	0	0	0.0476001	0	0	0	0
k__Bacteria|p__Firmicutes|c__Negativicutes|o__Selenomonadales|f__Veillonellaceae|g__Megamonas|s__Megamonas_rupellensis	0	0	0	1.66064	0	0	0.05186	0.0173122	0.00142	0	0	0.00452	0	0.0253801	0	0.121601	0	0	0	0	0.00985	0	0.0587067	2.12213	4.5024	0	0	0.0899879	1.91251	0	0	0	0	0	0	0	3.53147	0	0	0.03783	0	0	0	0	0.0139362	0	0	0	0
k__Bacteria|p__Firmicutes|c__Negativicutes|o__Selenomonadales|f__Veillonellaceae|g__Megamonas|s__Megamonas_unclassified	10.1811	0	0.0038201	3.12014	0	0	7.19691	14.9611	4.62719	5.40987	0	11.9529	0.00263013	2.61394	0.00168	17.2893	0	2.25087	0	0	4.00818	0	0.30373	7.48306	16.8615	0	0.00286	2.1669	7.80333	0.00489	0	0	0	0	7.114	0	22.8212	0	0	23.4516	0	0	0	0	1.32515	0	0	0	0
k__Bacteria|p__Firmicutes|c__Negativicutes|o__Selenomonadales|f__Veillonellaceae|g__Megasphaera|s__Megasphaera_elsdenii	0.00173107	0	0.00365009	0.154353	0	0.06675	0	0	0	0	0	0	0	0	0	0	0	0	2.61166	0	0	0	0	0	0	0	0	0	0	0	0	0.0038639	0	0	0	0	0	0	0	0	0	0	0	0	0	0	0	0	0
k__Bacteria|p__Firmicutes|c__Negativicutes|o__Selenomonadales|f__Veillonellaceae|g__Megasphaera|s__Megasphaera_micronuciformis	0	0	0	0	0.070807	0	0	0	0	0	0	0	0	0.00494002	0	0	0	0	0	0	0	0	0	0	0	0	0	0	0	0	0	0	0	0	0	0	0	0	0	0.00201	0	0	0	0	0	0	0	1.13226	0
k__Bacteria|p__Firmicutes|c__Negativicutes|o__Selenomonadales|f__Veillonellaceae|g__Megasphaera|s__Megasphaera_unclassified	0.979813	0	0.151244	0.0324137	0	0.13363	0	0.746023	0	0	0	0	0	0	0	0	0	0	11.429	0	0	0	0	0	0	0	0	0	0	0	0	0.358304	0	0	0	0	0.01165	0	0	0	0	0	0	0	0	0	0	0	0
k__Bacteria|p__Firmicutes|c__Negativicutes|o__Selenomonadales|f__Veillonellaceae|g__Mitsuokella|s__Mitsuokella_multacida	0	0	0	0	0	0.11038	0	0	0	0	0	0	0	0	0	0	0	0	0	0	0	0	0	0.34209	0	0	0	0	0.409145	0	0	0	0	0	0	0.0022	0	0	0	0	0	0	0	0	0	0	0	0	0
k__Bacteria|p__Firmicutes|c__Negativicutes|o__Selenomonadales|f__Veillonellaceae|g__Mitsuokella|s__Mitsuokella_unclassified	0.00345213	0	0	0	0	0.47572	0.00817	0	0	0	0	0	0	0	0	0	0	0	0	0	0	0	0.00774485	0.0770948	0	0	0	0	0.0609052	0	0	0	0	0	0	0.79517	0	0	0	0	0	0	0.00611039	0	0	0	0	0	0
k__Bacteria|p__Firmicutes|c__Negativicutes|o__Selenomonadales|f__Veillonellaceae|g__Veillonella|s__Veillonella_atypica	0.00182112	0.000348958	0	0.285811	0.153961	0.03034	0.00283	0	0	0	0	0.06278	0.00151157	0.0796803	0.00381	0	0	0.02769	0.0049	0.0184487	0	0.01512	0.0137986	0	0	0.002	0.04016	0.00529812	0	0.05024	0	0	2.60893	0	0.02088	0	0	0.0138	0	0.00395	0.0167838	0	0.00561036	0	0.00434111	0	0.00791	0.01122	0
k__Bacteria|p__Firmicutes|c__Negativicutes|o__Selenomonadales|f__Veillonellaceae|g__Veillonella|s__Veillonella_dispar	0	0	0	0.430635	0.149094	0.03231	0	0	0	0	0	0.00928	0.00422232	0.168351	0	0	0	0.01172	0.00272	0.00584607	0	0.00211	0.011107	0	0	0.00054	0.03585	0.000290445	0	0.02261	0.00026	0	0.3623	0	0.00038	0	0	0	0	0	0	0	0	0	0	0	0.00858	0	0
k__Bacteria|p__Firmicutes|c__Negativicutes|o__Selenomonadales|f__Veillonellaceae|g__Veillonella|s__Veillonella_parvula	0.00203125	0	0.0161904	0.0503229	0.384707	0.10715	0	0.00327041	0	0.00626	0	0.04341	0.614293	0.0943004	0.00905	0.0108701	0.06603	0.19884	0.0731	0.0420606	0.00495	0.13736	0.0516223	0.109195	0.0283	0.25839	0.68685	0.0155338	0.118051	0.03331	0.01585	0.00213969	0.03542	0.00118264	0.54763	0	0	0.11751	0.01059	0.00098	1.78574	0	0.046323	0	0.0226691	0.10232	0.01076	0.29574	0.00953
k__Bacteria|p__Firmicutes|c__Negativicutes|o__Selenomonadales|f__Veillonellaceae|g__Veillonella|s__Veillonella_unclassified	0.0187916	0.0151427	0.0210205	2.07183	2.80262	0.87526	0.01983	0.0127116	0.00293	0.01031	0.00658	0.22867	0.272919	1.44179	0.01028	0.00641007	0.07288	0.11437	0.05772	0.129979	0.01484	0.08302	0.0402952	0.0356815	0.01587	0.1603	0.28348	0.0114976	0.0445361	0.10744	0.03145	0.00171383	2.92733	0.0124077	1.6229	0.00617	0.00072	0.53461	0.01125	0.01353	2.16742	0.01523	0.0183912	0	0.0357736	0.01368	0.02001	0.03002	0.02109
k__Bacteria|p__Fusobacteria|c__Fusobacteriia|o__Fusobacteriales|f__Fusobacteriaceae|g__Fusobacterium|s__Fusobacterium_mortiferum	0	0	0	0	0	0	0	0	0	6.47016	0	0	0	0	0	0	0	0	0	0	0	0	0	0	0	0	0	0	0	0	0	0.0241598	0	0	0.07169	0	0.22784	0	0	0	0	0	0	0	0	0	0	0	0
k__Bacteria|p__Fusobacteria|c__Fusobacteriia|o__Fusobacteriales|f__Fusobacteriaceae|g__Fusobacterium|s__Fusobacterium_nucleatum	0	0	0	0	0	0	0	0	0	0	0	0	0	0	0	0	0	0	0	0	0	0	0	0	0	0	0	0	0	0	0	0	0	0	0.00503	0	0	0	0	0	0	0	0	0	0	0	0	0	0
k__Bacteria|p__Fusobacteria|c__Fusobacteriia|o__Fusobacteriales|f__Fusobacteriaceae|g__Fusobacterium|s__Fusobacterium_periodonticum	0	0	0	0	0.0404854	0	0	0	0	0	0	0	0	0.00807003	0	0	0	0	0	0	0	0	0	0	0	0	0	0	0	0	0	0	0	0	0.00176	0	0	0	0	0	0	0	0	0	0	0	0	0	0
k__Bacteria|p__Fusobacteria|c__Fusobacteriia|o__Fusobacteriales|f__Fusobacteriaceae|g__Fusobacterium|s__Fusobacterium_ulcerans	0	0	0	0	0	0.02617	0	0	0	0	0	0	0	0	0	0	0	0.05773	0	0	0	0	0	0	0	0	0	0	0	0.12276	0	0	0.01013	0	0	0	0	0	0	0	0	0	0	0	0	0	0	0	0
k__Bacteria|p__Fusobacteria|c__Fusobacteriia|o__Fusobacteriales|f__Fusobacteriaceae|g__Fusobacterium|s__Fusobacterium_varium	0	0	0	0	0	0.09341	0	0	0	0	0	0	0	0	0	0	0	0	0	0	0	0	0	0	0	0	0	0	0	0	0	0	7.06971	0	0	0	0	0	0	0	0	0	0	0	0	0	0	0	0
k__Bacteria|p__Fusobacteria|c__Fusobacteriia|o__Fusobacteriales|f__Leptotrichiaceae|g__Leptotrichia|s__Leptotrichia_unclassified	0	0	0	0	0.00613841	0	0	0	0	0	0	0	0	0	0	0	0	0	0	0	0	0	0	0	0	0	0	0	0	0	0	0	0	0	0	0	0	0	0	0	0	0	0	0	0	0	0	0	0
k__Bacteria|p__Fusobacteria|c__Fusobacteriia|o__Fusobacteriales|f__Leptotrichiaceae|g__Leptotrichia|s__Leptotrichia_wadei	0	0	0	0	0.000720987	0	0	0	0	0	0	0	0	0	0	0	0	0	0	0	0	0	0	0	0	0	0	0	0	0	0	0	0	0	0	0	0	0	0	0	0	0	0	0	0	0	0	0	0
k__Bacteria|p__Proteobacteria|c__Alphaproteobacteria|o__Caulobacterales|f__Caulobacteraceae|g__Brevundimonas|s__Brevundimonas_diminuta	0	0	0	0	0	0	0	0	0	0	0	0	0	0	0	0	0	0	0	0	0	0	0	0	0	0	0	0	0	0	0	0	0	0	0	0	0	0	0	0	0	0	0	0	0	0	0	0	0
k__Bacteria|p__Proteobacteria|c__Alphaproteobacteria|o__Rhizobiales|f__Brucellaceae|g__Ochrobactrum|s__Ochrobactrum_anthropi	0	0	0	0	0	0	0	0	0	0	0	0	0	0	0	0	0	0	0	0	0	0	0	0	0	0	0	0	0	0	0	0	0	0	0	0	0	0	0	0	0	0	0	0	0	0	0	0	0
k__Bacteria|p__Proteobacteria|c__Alphaproteobacteria|o__Rhizobiales|f__Rhizobiaceae|g__Agrobacterium|s__Agrobacterium_tumefaciens	0	0	0	0	0	0	0	0	0	0	0	0	0	0	0	0	0	0	0	0	0	0	0	0	0	0	0	0	0	0	0	0	0	0	0	0	0	0	0	0	0	0	0	0	0	0	0	0	0
k__Bacteria|p__Proteobacteria|c__Alphaproteobacteria|o__Rhizobiales|f__Rhizobiaceae|g__Agrobacterium|s__Agrobacterium_unclassified	0	0	0	0	0	0	0	0	0	0	0	0	0	0	0	0	0	0	0	0	0	0	0	0	0	0	0	0	0	0	0	0	0	0	0	0	0	0	0	0	0	0	0	0	0	0	0	0	0
k__Bacteria|p__Proteobacteria|c__Alphaproteobacteria|o__Rhizobiales|f__Rhizobiaceae|g__Shinella|s__Shinella_zoogloeoides	0	0	0	0	0	0	0	0	0	0	0	0	0	0	0	0	0	0	0	0	0	0	0	0	0	0	0	0	0	0	0	0	0	0	0	0	0	0	0	0	0	0	0	0	0	0	0	0	0
k__Bacteria|p__Proteobacteria|c__Alphaproteobacteria|o__Rhizobiales|f__Rhizobiaceae|g__Sinorhizobium|s__Sinorhizobium_unclassified	0	0	0	0	0	0	0	0	0	0	0	0	0	0	0	0	0	0	0	0	0	0	0	0	0	0	0	0	0	0	0	0	0	0	0	0	0	0	0	0	0	0	0	0	0	0	0	0	0
k__Bacteria|p__Proteobacteria|c__Alphaproteobacteria|o__Rhodobacterales|f__Rhodobacteraceae|g__Paracoccus|s__Paracoccus_denitrificans	0	0	0	0	0	0	0	0	0	0	0	0	0	0	0	0	0	0	0	0	0	0	0	0	0	0	0	0	0	0	0	0	0	0	0	0	0	0	0	0	0	0	0	0	0	0	0	0	0
k__Bacteria|p__Proteobacteria|c__Alphaproteobacteria|o__Rhodobacterales|f__Rhodobacteraceae|g__Paracoccus|s__Paracoccus_unclassified	0	0	0	0	0	0	0	0	0	0	0	0	0	0	0	0	0	0	0	0	0	0	0	0	0	0	0	0	0	0	0	0	0	0	0	0	0	0	0	0	0	0	0	0	0	0	0	0	0
k__Bacteria|p__Proteobacteria|c__Alphaproteobacteria|o__Sphingomonadales|f__Sphingomonadaceae|g__Sphingopyxis|s__Sphingopyxis_unclassified	0	0	0	0	0	0	0	0	0	0	0	0	0	0	0	0	0	0	0	0	0	0	0	0	0	0	0	0	0	0	0	0	0	0	0	0	0	0	0	0	0	0	0	0	0	0	0	0	0
k__Bacteria|p__Proteobacteria|c__Betaproteobacteria|o__Burkholderiales|f__Alcaligenaceae|g__Achromobacter|s__Achromobacter_unclassified	0	0	0	0	0	0	0	0	0	0	0	0	0	0	0	0	0	0	0	0	0	0	0	0	0	0	0	0	0	0	0	0	0	0	0	0	0	0	0	0	0	0	0	0	0	0	0	0	0
k__Bacteria|p__Proteobacteria|c__Betaproteobacteria|o__Burkholderiales|f__Alcaligenaceae|g__Alcaligenes|s__Alcaligenes_unclassified	0	0.00565735	0	0.00119864	0.0232518	0	0	0	0	0	0	0.01851	0	0	0	0.00568007	0.0058	0.00078	0	0	0	0.01159	0	0.0134543	0	0	0.02058	0.00218335	0.0170506	0.02085	0.00022	0	0.0004	0	0	0	0	0	0	0.00049	0	0	0	0	0	0	0	0	0
k__Bacteria|p__Proteobacteria|c__Betaproteobacteria|o__Burkholderiales|f__Alcaligenaceae|g__Pusillimonas|s__Pusillimonas_unclassified	0	0	0	0	0	0	0	0	0	0	0	0	0	0	0	0	0	0	0	0	0	0	0	0	0	0	0	0	0	0	0	0	0	0	0	0	0	0	0	0	0	0	0	0	0	0	0	0	0
k__Bacteria|p__Proteobacteria|c__Betaproteobacteria|o__Burkholderiales|f__Burkholderiaceae|g__Lautropia|s__Lautropia_mirabilis	0	0	0	0	0.0614241	0	0	0	0	0	0	0	0	0	0	0	0	0	0	0	0	0	0	0	0	0	0	0	0	0	0	0	0	0	0	0	0	0	0	0	0	0	0	0	0	0	0	0	0
k__Bacteria|p__Proteobacteria|c__Betaproteobacteria|o__Burkholderiales|f__Burkholderiales_noname|g__Burkholderiales_noname|s__Burkholderiales_bacterium_1_1_47	0	0	0.0191105	0.00019138	0	0.03131	0.03042	0.316149	0.04963	0	0.33126	0.05687	0.78245	0.208391	0.09054	0.207782	0.27098	0.00805	0.00833	0.166318	0	0.00485	0	0.0316302	0.06476	0.23048	0.00462	0.0108566	0.0510116	0.0832	0	0.0873636	0	0.337615	0	0	0	0	0.34046	0	0	0	0.350893	0	0.453362	0.35868	1.51378	0	1.25453
k__Bacteria|p__Proteobacteria|c__Betaproteobacteria|o__Burkholderiales|f__Burkholderiales_noname|g__Thiomonas|s__Thiomonas_unclassified	0	0	0	0	0	0	0	0	0	0	0	0	0	0	0	0	0	0	0	0	0	0	0	0	0	0	0	0	0	0	0	0	0	0	0	0	0	0	0	0	0	0	0	0	0	0	0	0	0
k__Bacteria|p__Proteobacteria|c__Betaproteobacteria|o__Burkholderiales|f__Comamonadaceae|g__Alicycliphilus|s__Alicycliphilus_denitrificans	0	0	0	0	0	0	0	0	0	0	0	0	0	0	0	0	0	0	0	0	0	0	0	0	0	0	0	0	0	0	0	0	0	0	0	0	0	0	0	0	0	0	0	0	0	0	0	0	0
k__Bacteria|p__Proteobacteria|c__Betaproteobacteria|o__Burkholderiales|f__Comamonadaceae|g__Alicycliphilus|s__Alicycliphilus_unclassified	0	0	0	0	0	0	0	0	0	0	0	0	0	0	0	0	0	0	0	0	0	0	0	0	0	0	0	0	0	0	0	0	0	0	0	0	0	0	0	0	0	0	0	0	0	0	0	0	0
k__Bacteria|p__Proteobacteria|c__Betaproteobacteria|o__Burkholderiales|f__Comamonadaceae|g__Comamonas|s__Comamonas_unclassified	0	0	0	0	0	0	0	0	0	0	0	0	0	0	0	0	0	0	0	0	0	0	0	0	0	0	0	0	0	0	0	0	0	0	0	0	0	0	0	0	0	0	0	0	0	0	0	0	0
k__Bacteria|p__Proteobacteria|c__Betaproteobacteria|o__Burkholderiales|f__Comamonadaceae|g__Delftia|s__Delftia_acidovorans	0	0	0	0	0	0	0	0	0	0	0	0	0	0	0	0	0	0	0	0	0	0	0	0	0	0	0	0	0	0	0	0	0	0	0	0	0	0	0	0	0	0	0	0	0	0	0	0	0
k__Bacteria|p__Proteobacteria|c__Betaproteobacteria|o__Burkholderiales|f__Comamonadaceae|g__Delftia|s__Delftia_unclassified	0	0	0	0	0	0	0	0	0	0	0	0	0	0	0	0	0	0	0	0	0	0	0	0	0	0	0	0	0	0	0	0	0	0	0	0	0	0	0	0	0	0	0	0	0	0	0	0	0
k__Bacteria|p__Proteobacteria|c__Betaproteobacteria|o__Burkholderiales|f__Comamonadaceae|g__Variovorax|s__Variovorax_unclassified	0	0	0	0	0	0	0	0	0	0	0	0	0	0	0	0	0	0	0	0	0	0	0	0	0	0	0	0	0	0	0	0	0	0	0	0	0	0	0	0	0	0	0	0	0	0	0	0	0
k__Bacteria|p__Proteobacteria|c__Betaproteobacteria|o__Burkholderiales|f__Oxalobacteraceae|g__Oxalobacter|s__Oxalobacter_formigenes	0	0	0	0	0	0	0	0	0	0	0	0.01353	0	0.00713003	0	0	0	0	0	0	0	0	0	0	0	0	0	0.000821258	0	0	0	0.160591	0	0	0	0	0	0	0	0	0	0	0.00334022	0	0	0	0	0	0
k__Bacteria|p__Proteobacteria|c__Betaproteobacteria|o__Burkholderiales|f__Sutterellaceae|g__Parasutterella|s__Parasutterella_excrementihominis	0.0212731	0	0.00347009	0	0.0165827	0.0357	0.03061	0.39931	0.07513	0	0.65927	0.05173	0.659156	0.197051	0.11208	0.389055	0.84347	0.00134	0.02468	0.332201	0	0	0	0.0832368	0.07586	0.90259	0.0079	0.0144221	0.0919993	0.11485	0	0.106174	0	0.00965158	0	0	0	0	0.46252	0	0	0	0.0544835	0	0.323454	0.67836	1.17509	0	1.28351
k__Bacteria|p__Proteobacteria|c__Betaproteobacteria|o__Burkholderiales|f__Sutterellaceae|g__Sutterella|s__Sutterella_parvirubra	0	0	0	0	0	0	0	0	0	0.21424	0	0	0	0	0	0	0	0	0	0	0	0	0	0	0	0	0	0	0	0	0	0	0	0	0.25385	0	0	0	0	0	0	0	0	0	0	0	0	0	0
k__Bacteria|p__Proteobacteria|c__Betaproteobacteria|o__Burkholderiales|f__Sutterellaceae|g__Sutterella|s__Sutterella_wadsworthensis	0.623764	0	2.33843	0	3.00225	0	0	0	0	0	0	3.3723	0	0	3.07742	0	0	1.04499	1.02102	0	0	4.80542	1.12632	4.78667	0	0	8.21861	1.01768	5.36424	0	0	0	0	0	0	0.00198	0	0	0	0	0	0	0	0	0	0	0	0	0
k__Bacteria|p__Proteobacteria|c__Betaproteobacteria|o__Neisseriales|f__Neisseriaceae|g__Neisseria|s__Neisseria_flavescens	0	0	0	0	0.0293302	0	0	0	0	0	0	0	0	0	0	0	0	0	0.04575	0.0208285	0	0	0	0	0	0	0	0	0	0	0	0	0	0	0	0	0	0	0	0	0	0	0	0	0	0	0	0	0
k__Bacteria|p__Proteobacteria|c__Betaproteobacteria|o__Neisseriales|f__Neisseriaceae|g__Neisseria|s__Neisseria_meningitidis	0	0	0	0	0.0103141	0	0	0	0	0	0	0	0	0	0	0	0	0	0.00087	0	0	0	0	0	0	0	0	0	0	0	0	0	0	0	0	0	0	0	0	0	0	0	0	0	0	0	0	0	0
k__Bacteria|p__Proteobacteria|c__Betaproteobacteria|o__Neisseriales|f__Neisseriaceae|g__Neisseria|s__Neisseria_sicca	0	0	0	0	0.00531728	0	0	0	0	0	0	0	0	0	0	0	0	0	0	0	0	0	0	0	0	0	0	0	0	0	0	0	0	0	0	0	0	0	0	0	0	0	0	0	0	0	0	0	0
k__Bacteria|p__Proteobacteria|c__Betaproteobacteria|o__Neisseriales|f__Neisseriaceae|g__Neisseria|s__Neisseria_subflava	0	0	0	0	0	0	0	0	0	0	0	0	0	0	0	0	0	0	0.0033	0	0	0	0	0	0	0	0	0	0	0	0	0	0	0	0	0	0	0	0	0	0	0	0	0	0	0	0	0	0
k__Bacteria|p__Proteobacteria|c__Betaproteobacteria|o__Neisseriales|f__Neisseriaceae|g__Neisseria|s__Neisseria_unclassified	0	0	0	0	0.0611538	0	0	0	0	0	0	0	0	0.00628003	0	0	0	0	0	0	0	0	0	0	0	0	0.00572	0	0	0	0	0	0	0	0	0	0	0	0	0	0	0	0	0	0	0	0	0	0
k__Bacteria|p__Proteobacteria|c__Betaproteobacteria|o__Rhodocyclales|f__Rhodocyclaceae|g__Thauera|s__Thauera_phenylacetica	0	0	0	0	0	0	0	0	0	0	0	0	0	0	0	0	0	0	0	0	0	0	0	0	0	0	0	0	0	0	0	0	0	0	0	0	0	0	0	0	0	0	0	0	0	0	0	0	0
k__Bacteria|p__Proteobacteria|c__Betaproteobacteria|o__Rhodocyclales|f__Rhodocyclaceae|g__Thauera|s__Thauera_terpenica	0	0	0	0	0	0	0	0	0	0	0	0	0	0	0	0	0	0	0	0	0	0	0	0	0	0	0	0	0	0	0	0	0	0	0	0	0	0	0	0	0	0	0	0	0	0	0	0	0
k__Bacteria|p__Proteobacteria|c__Deltaproteobacteria|o__Desulfovibrionales|f__Desulfovibrionaceae|g__Bilophila|s__Bilophila_unclassified	0.284585	0.506909	0.244396	0.0430706	0.0823928	0.08724	0.41088	0.950228	0.11014	0.04406	0.54791	0.42703	0.0446619	0.276111	0.26553	0.0214203	0.42309	0.19371	0	0.525287	0.01261	0.19499	0	0.0251481	0.14981	0	0.07312	0.235401	0.0352741	0.07913	0.45356	0.290218	0	0	0.25033	0.06458	0.09534	0.41055	0	0.00145	0	0.13539	1.0496	2.78351	0.483476	0	0	0	0
k__Bacteria|p__Proteobacteria|c__Deltaproteobacteria|o__Desulfovibrionales|f__Desulfovibrionaceae|g__Bilophila|s__Bilophila_wadsworthia	0.0563147	0.0254422	0.0039701	0	0	0.01458	0.04747	0.0666283	0.01475	0	0.00474	0.04209	0	0.0212401	0.03888	0.00143002	0.00644	0.01809	0	0.0371768	0	0.0023	0	0.00121039	0.00509	0	0.00328	0.0375876	0	0.00459	0.05835	0.0140534	0	0	0.01603	0.00352	0.00729	0.02541	0	0	0	0	0.0093906	0.5632	0.0394757	0	0	0	0
k__Bacteria|p__Proteobacteria|c__Deltaproteobacteria|o__Desulfovibrionales|f__Desulfovibrionaceae|g__Desulfovibrio|s__Desulfovibrio_desulfuricans	0.00400246	0.021297	0	0	0	0	0	0.00256032	0	0	0	0	0	0.0182201	0	0	0	0	0	0.00214183	0	0	0	0	0	0	0	0	0	0	0	0	0	0.0463937	0.0031	0	0	0	0	0	0	0	0	0	0	0	0	0	0
k__Bacteria|p__Proteobacteria|c__Deltaproteobacteria|o__Desulfovibrionales|f__Desulfovibrionaceae|g__Desulfovibrio|s__Desulfovibrio_piger	0	0	0	0	0.0381823	0	0.06405	0	0	0	0	0	0	0	0	0	0	0	0	0	0	0	0	0	0	0	0	0.0882552	0	0	0	0.378237	0	0	0	0	0	0	0	0	0	0.10725	0	0	0	0	0	0	0
k__Bacteria|p__Proteobacteria|c__Epsilonproteobacteria|o__Campylobacterales|f__Campylobacteraceae|g__Campylobacter|s__Campylobacter_concisus	0	0	0	0	0.0289296	0	0	0	0	0	0	0	0	0.000920004	0	0	0	0	0	0	0	0	0	0	0	0	0	0	0	0	0	0	0	0	0	0	0	0	0	0	0	0	0	0	0	0	0	0	0
k__Bacteria|p__Proteobacteria|c__Epsilonproteobacteria|o__Campylobacterales|f__Campylobacteraceae|g__Campylobacter|s__Campylobacter_hominis	0	0	0	0	0.00110151	0	0	0	0	0	0.0101	0	0	0	0	0	0	0	0	0	0	0	0	0	0	0	0	0	0	0	0	0.0186132	0	0	0	0	0	0	0	0	0	0	0	0	0.045247	0	0	0	0
k__Bacteria|p__Proteobacteria|c__Epsilonproteobacteria|o__Campylobacterales|f__Campylobacteraceae|g__Campylobacter|s__Campylobacter_ureolyticus	0	0	0	0	0	0	0	0	0	0	0	0	0	0	0	0	0	0	0	0	0	0	0	0	0	0	0	0	0	0	0	0	0	0	0	0	0	0	0	0	0	0	0	0	0	0	0	0	0
k__Bacteria|p__Proteobacteria|c__Epsilonproteobacteria|o__Campylobacterales|f__Helicobacteraceae|g__Helicobacter|s__Helicobacter_pylori	0	0	0	0	0	0	0	0	0	0	0	0	0	0	0	0	0	0	0	0	0	0	0	0	0	0	0	0	0	0	0	0	0	0	0	0	0	0	0	0	0	0	0	0	0	0	0	0	0
k__Bacteria|p__Proteobacteria|c__Gammaproteobacteria|o__Aeromonadales|f__Aeromonadaceae|g__Aeromonas|s__Aeromonas_veronii	0	0	0	0	0	0	0	0	0	0	0	0	0	0	0	0	0	0.06114	0	0	0	0	0	0	0	0	0	0	0	0	0	0	0	0	0	0	0	0	0	0	0	0	0	0	0	0	0	0	0
k__Bacteria|p__Proteobacteria|c__Gammaproteobacteria|o__Cardiobacteriales|f__Cardiobacteriaceae|g__Cardiobacterium|s__Cardiobacterium_hominis	0	0	0	0	0.000420576	0	0	0	0	0	0	0	0	0	0	0	0	0	0	0	0	0	0	0	0	0	0	0	0	0	0	0	0	0	0	0	0	0	0	0	0	0	0	0	0	0	0	0	0
k__Bacteria|p__Proteobacteria|c__Gammaproteobacteria|o__Enterobacteriales|f__Enterobacteriaceae|g__Citrobacter|s__Citrobacter_freundii	0	0	0	0.0328267	0	0.14293	0	0	0	0	0	0	0	0.169081	0.2849	0	0.20396	0.13408	0.15378	0	0	0	0.00353221	0.00324104	0	0.00101	0	0	0.00693653	0	0	0	0	0	0	0	0	0	0	0	0	0	0	0	0.00420926	0	0	0.09645	0
k__Bacteria|p__Proteobacteria|c__Gammaproteobacteria|o__Enterobacteriales|f__Enterobacteriaceae|g__Citrobacter|s__Citrobacter_unclassified	0	0	0	0.0366644	0	0.04767	0	0	0	0	0	0.00664	0	0.184461	0.37799	0	0.10113	0.16976	0.12697	0.00661174	0	0	0.0120075	0.0112736	0	0	0	0	0.00899143	0	0	0	0	0	0	0	0	0	0	0	0	0	0	0	0.00287041	0	0	0.00662	0
k__Bacteria|p__Proteobacteria|c__Gammaproteobacteria|o__Enterobacteriales|f__Enterobacteriaceae|g__Cronobacter|s__Cronobacter_malonaticus	0	0	0	0	0	0	0	0	0	0	0	0	0.0731298	0.10492	0	0	0	0	0	0	0	0	0	0	0	0	0	0	0	0	0	0	0	0	0	0	0	0	0	0	0	0	0	0	0	0	0	0	0
k__Bacteria|p__Proteobacteria|c__Gammaproteobacteria|o__Enterobacteriales|f__Enterobacteriaceae|g__Cronobacter|s__Cronobacter_sakazakii	0	0	0	0	0	0	0	0	0	0	0	0	0.0153979	0.0981204	0	0	0	0	0	0	0	0	0	0	0	0	0	0	0	0	0	0	0	0	0	0	0	0	0	0	0	0	0	0	0	0	0	0	0
k__Bacteria|p__Proteobacteria|c__Gammaproteobacteria|o__Enterobacteriales|f__Enterobacteriaceae|g__Enterobacter|s__Enterobacter_aerogenes	0	0	0	0.123954	0	0	0	0	0	0	0	0	0	0	0	0	0.00305	0	0.63755	0	0	0	0	0	0	0	0	0	0	0	0	0	0	0	0	0	0	4.5093	0	0	0	0	0	0	0	0	0	0	0
k__Bacteria|p__Proteobacteria|c__Gammaproteobacteria|o__Enterobacteriales|f__Enterobacteriaceae|g__Enterobacter|s__Enterobacter_cloacae	0.34084	0	0	0.720828	0	0	0	0	0	0	0	0	2.62268	0.198481	0.08245	0	0.74364	0.0653	1.16884	0.22125	0	0	0.0424566	4.72637	0	0.07854	0	0	3.93995	0	0.03992	0	0	0	0.05214	0.03028	0	0	0.01429	0	0	0	0	0	0.839904	0	0	0	0
k__Bacteria|p__Proteobacteria|c__Gammaproteobacteria|o__Enterobacteriales|f__Enterobacteriaceae|g__Enterobacter|s__Enterobacter_hormaechei	0	0	0	0	0	0	0	0	0	0	0	0	0	0	0	0	0	0	0	0	0	0	0	0	0	0	0	0	0.00460097	0	0	0	0	0	0	0	0	0	0	0	0	0	0	0	0	0	0	0	0
k__Bacteria|p__Proteobacteria|c__Gammaproteobacteria|o__Enterobacteriales|f__Enterobacteriaceae|g__Enterobacter|s__Enterobacter_mori	0	0	0	0	0	0	0	0	0	0	0	0	0	0	0	0	0	0	0.00267	0	0	0	0	0	0	0	0	0	0	0	0	0	0	0	0	0	0	0	0	0	0	0	0	0	0	0	0	0	0
k__Bacteria|p__Proteobacteria|c__Gammaproteobacteria|o__Enterobacteriales|f__Enterobacteriaceae|g__Escherichia|s__Escherichia_albertii	0	0	0	0	0	0	0	0	0	0.02095	0	0	0	0	0.12355	0	0	0	0	0	0	0	0	0	0	0	0	0	0	0	0	0	0	0	0	0	0	0	0	0	0	0	0	0	0	0	0	0	0
k__Bacteria|p__Proteobacteria|c__Gammaproteobacteria|o__Enterobacteriales|f__Enterobacteriaceae|g__Escherichia|s__Escherichia_coli	1.99841	1.8394	0.424791	1.77563	9.19166	14.9263	0.14454	0.651931	5.64065	0.00989	0.60287	1.87213	0.389814	13.1873	0.48755	0.89226	0.44701	9.54709	0.39655	4.53549	0.1065	0.13903	0.139117	0.605825	3.7675	1.5151	0.32332	0.214489	1.07835	0.11562	0.16018	0.466473	0	0	0.27011	0.1318	4.78915	0.34118	0.05774	3.30063	0.405872	3.98266	1.02802	0.90562	0.102483	6.56499	0	4.18386	0.32422
k__Bacteria|p__Proteobacteria|c__Gammaproteobacteria|o__Enterobacteriales|f__Enterobacteriaceae|g__Escherichia|s__Escherichia_hermannii	0	0	0	0	0	0	0	0	0	0	0	0	0	0	0	0	0	0	0	0.245752	0	0	0	0	0	0	0	0	0	0	0	0	0	0	0	0	0	0	0	0	0	0	0	0	0	0	0	0	0
k__Bacteria|p__Proteobacteria|c__Gammaproteobacteria|o__Enterobacteriales|f__Enterobacteriaceae|g__Escherichia|s__Escherichia_unclassified	1.06416	0.820326	0.0640316	0.633709	0	8.00642	0.01835	0.16326	0.56765	0.03963	0	0.36369	0.281435	5.62387	0.34712	0.521016	0.3106	0	0.37547	1.95184	0.04607	0	0.109899	0.747761	1.77964	0.48464	0	0.0204213	0.235171	0.04819	0.0701	0.0112489	0.01263	0	0.00632	0	0.78989	0.36394	0.02694	0.84076	0.013253	0.24842	0.111777	0.66617	0.00116642	0.00317	0.01751	0	0.23917
k__Bacteria|p__Proteobacteria|c__Gammaproteobacteria|o__Enterobacteriales|f__Enterobacteriaceae|g__Klebsiella|s__Klebsiella_oxytoca	0.254267	0	0	0	0	0	0	0	0	0	0	0	0	0.00386002	0.00334	0	0	0.02937	0.09135	0.117811	0	0	0	0	0	0	0	0	0	0	0	0	0	0	0.00032	0	0	0	0	0	0	0	0	0	0.00396583	0	0	0	0
k__Bacteria|p__Proteobacteria|c__Gammaproteobacteria|o__Enterobacteriales|f__Enterobacteriaceae|g__Klebsiella|s__Klebsiella_pneumoniae	0	0	0.0107203	10.7211	0.507375	0.19309	0	0	0.1941	0	0	2.52526	21.4858	0.681443	0.41687	1.22079	0.10243	4.94303	1.35496	0	0.03533	0	0.267177	10.4618	0	0.03049	0	0	10.0193	0.00918	0.08677	0.0356788	0	0	0	0.14226	0.00476	1.07961	0	0	0	0.01801	0	0	0.299577	0.23731	0	0.13107	9.61493
k__Bacteria|p__Proteobacteria|c__Gammaproteobacteria|o__Enterobacteriales|f__Enterobacteriaceae|g__Klebsiella|s__Klebsiella_sp_MS_92_3	0	0	0	1.17091	0	0	0	0	0	0	0	0	2.06345	0	0	0	0	0	0	0	0	0	0	1.16393	0	0	0	0	1.14805	0	0	0	0	0	0	0	0	0	0	0	0	0	0	0	0	0	0	0	0
k__Bacteria|p__Proteobacteria|c__Gammaproteobacteria|o__Enterobacteriales|f__Enterobacteriaceae|g__Klebsiella|s__Klebsiella_unclassified	0.181872	0	0.0080702	0	0	0	0	0	0	0	0	0.28296	0	0.0338201	0	0	0	0	0	0.19024	0	0	0	0	0	0	0	0	0	0	0	0.0143754	0	0	0.01056	0	0.00741	0	0	0	0	0	0	0	0	0	0	0	0
k__Bacteria|p__Proteobacteria|c__Gammaproteobacteria|o__Enterobacteriales|f__Enterobacteriaceae|g__Klebsiella|s__Klebsiella_variicola	0	0	0	0	0.00135185	0	0	0	0	0	0	0	0	0	0	0	0	0	0	0	0	0	0	0.00173056	0	0	0	0	0	0	0	0	0	0	0	0	0	0	0	0	0	0	0	0	0	0	0	0	0
k__Bacteria|p__Proteobacteria|c__Gammaproteobacteria|o__Enterobacteriales|f__Enterobacteriaceae|g__Morganella|s__Morganella_morganii	0	0	0	0	0.0641078	0	0	0	0	0	0	0	0	0	0	0	0	0.00522	0	0	0	0	0	0	0	0	0	0	0	0	0	0	0	0	0	0	0	0	0	0	0	0	0	0	0	0	0	0	0
k__Bacteria|p__Proteobacteria|c__Gammaproteobacteria|o__Enterobacteriales|f__Enterobacteriaceae|g__Pantoea|s__Pantoea_unclassified	0	0	0	0	0	0	0	0	0	0	0	0	0	0	0	0	0.01079	0	0	0	0	0	0	0	0	0	0	0	0.0103948	0	0	0	0	0	0	0	0	0	0	0.00329	0	0	0	0	0	0	0	0	0
k__Bacteria|p__Proteobacteria|c__Gammaproteobacteria|o__Enterobacteriales|f__Enterobacteriaceae|g__Plesiomonas|s__Plesiomonas_shigelloides	0	0	0	0	0	0	0	0	0	0	0	0	0	0	0	0	0	0	0	0	0	0	0	0	0	0	0	0	0	0	0	0	0	0	0	0	0	0	0	0	0	0	0	0	0	0	0	0	0
k__Bacteria|p__Proteobacteria|c__Gammaproteobacteria|o__Enterobacteriales|f__Enterobacteriaceae|g__Proteus|s__Proteus_mirabilis	0	0	0	0	0.00788079	0	0	0	0	0	0	0	0	0	0	0	0	0	0	0	0	0	0	0	0	0	0	0	0	0	0	0	0	0	0	0	0	0	0	0	0	0	0	0	0	0	0	0.03567	0
k__Bacteria|p__Proteobacteria|c__Gammaproteobacteria|o__Enterobacteriales|f__Enterobacteriaceae|g__Raoultella|s__Raoultella_ornithinolytica	0	0	0	0	0	0	0	0	0	0	0	0	0.0362374	0.0187901	0.08986	0	0.00237	0.05756	0.01347	0	0	0	0	0	0	0	0	0	0.00142339	0	0	0	0	0	0	0	0	0	0	0	0	0	0	0	0	0	0	0	0
k__Bacteria|p__Proteobacteria|c__Gammaproteobacteria|o__Enterobacteriales|f__Enterobacteriaceae|g__Serratia|s__Serratia_marcescens	0	0	0	0	0	0	0	0	0	0	0	0.00267	0	0	0	0	0	0	0	0	0	0	0	0.021697	0	0	0	0	0	0	0	0.0106465	0	0.00122273	0	0	0	0	0	0.00591	0	0	0	0	0	0	0	0	0
k__Bacteria|p__Proteobacteria|c__Gammaproteobacteria|o__Enterobacteriales|f__Enterobacteriaceae|g__Shigella|s__Shigella_flexneri	0	0	0	0	0	0	0	0	0	0	0	0	0	0	0	0	0	0	0	0	0	0	0	0	0	0	0	0	0	0	0	0	0	0	0	0	0	0	0	0	0	0	0	0	0	0	0	0	0
k__Bacteria|p__Proteobacteria|c__Gammaproteobacteria|o__Enterobacteriales|f__Enterobacteriaceae|g__Shigella|s__Shigella_sonnei	0	0.00893544	0	0	0	0	0	0	0	0	0	0	0	0	0	0	0	0	0	0	0	0	0	0.0208467	0	0	0	0	0.0134821	0	0	0	0	0	0	0	0	0	0	0	0	0	0	0	0	0	0	0	0
k__Bacteria|p__Proteobacteria|c__Gammaproteobacteria|o__Pasteurellales|f__Pasteurellaceae|g__Actinobacillus|s__Actinobacillus_unclassified	0	0	0.00490012	0	0.00951303	0	0	0	0	0	0	0	0	0	0	0	0	0	0	0	0.011	0	0	0	0	0	0	0	0	0	0	0	0	0	0	0	0	0	0	0	0	0	0	0	0	0	0	0	0
k__Bacteria|p__Proteobacteria|c__Gammaproteobacteria|o__Pasteurellales|f__Pasteurellaceae|g__Aggregatibacter|s__Aggregatibacter_aphrophilus	0	0	0	0	0.0168331	0	0	0	0	0	0	0	0	0	0	0	0	0	0	0	0	0	0	0	0	0	0	0	0	0	0	0	0	0	0	0	0	0	0	0	0	0	0	0	0	0	0	0	0
k__Bacteria|p__Proteobacteria|c__Gammaproteobacteria|o__Pasteurellales|f__Pasteurellaceae|g__Aggregatibacter|s__Aggregatibacter_segnis	0	0	0	0	0.0174839	0	0	0	0	0	0	0	0	0	0	0	0	0	0	0.0143927	0	0	0.00436273	0	0	0.01912	0	0	0	0	0	0	0	0	0.01757	0	0	0	0	0	0	0	0	0	0	0	0	0	0
k__Bacteria|p__Proteobacteria|c__Gammaproteobacteria|o__Pasteurellales|f__Pasteurellaceae|g__Aggregatibacter|s__Aggregatibacter_unclassified	0	0	0.00537013	0	0.0158617	0	0	0	0	0	0	0	0	0	0	0	0	0	0	0	0	0	0.00251157	0	0	0	0	0	0	0	0	0	0	0	0	0	0	0.00105	0	0	0	0	0	0	0	0	0	0	0
k__Bacteria|p__Proteobacteria|c__Gammaproteobacteria|o__Pasteurellales|f__Pasteurellaceae|g__Haemophilus|s__Haemophilus_haemolyticus	0	0	0	0	0.0268668	0	0	0	0	0	0	0	0	0	0	0	0	0	0.00087	0	0	0	0	0	0	0	0	0	0	0	0	0	0	0	0	0	0	0	0	0	0	0	0	0	0	0	0	0	0
k__Bacteria|p__Proteobacteria|c__Gammaproteobacteria|o__Pasteurellales|f__Pasteurellaceae|g__Haemophilus|s__Haemophilus_influenzae	0	0	0	0	0.00902236	0	0	0	0	0	0	0	0	0	0	0	0	0	0	0	0	0	0	0	0	0	0	0	0	0	0	0	0	0	0	0	0	0	0	0	0	0	0	0	0	0	0	0	0
k__Bacteria|p__Proteobacteria|c__Gammaproteobacteria|o__Pasteurellales|f__Pasteurellaceae|g__Haemophilus|s__Haemophilus_parainfluenzae	0.233434	0.00682054	0.699218	0.549865	6.94134	0.02625	0	0.00024003	0	0.24213	0.02126	1.05756	0.711457	1.89676	0.03904	0.0793409	0.2424	0.01365	0.86203	1.00752	0.41074	0.04454	0.177861	0.260104	0.07786	0.20021	0.25806	0.00441677	0.273011	0.16281	0.19284	0	0	0	0.79009	0	0	0.0155	0.08723	0	0	0	0	0	0.00399626	0	0	0	0
k__Bacteria|p__Proteobacteria|c__Gammaproteobacteria|o__Pasteurellales|f__Pasteurellaceae|g__Haemophilus|s__Haemophilus_paraphrohaemolyticus	0	0	0	0	0.00395542	0	0	0	0	0	0	0	0	0	0	0	0	0	0	0	0.07622	0	0	0	0	0	0	0	0	0	0	0	0	0	0	0	0	0	0	0	0	0	0	0	0	0	0	0	0
k__Bacteria|p__Proteobacteria|c__Gammaproteobacteria|o__Pasteurellales|f__Pasteurellaceae|g__Haemophilus|s__Haemophilus_pittmaniae	0	0	0	0	0	0	0	0	0	0	0	0	0	0	0	0	0	0	0.00155	0	0	0	0	0	0	0	0	0	0	0	0	0	0	0	0	0	0	0	0	0	0	0	0	0	0	0	0	0	0
k__Bacteria|p__Proteobacteria|c__Gammaproteobacteria|o__Pasteurellales|f__Pasteurellaceae|g__Haemophilus|s__Haemophilus_sputorum	0	0	0.0193405	0	0.19746	0	0	0	0	0	0	0	0	0	0	0	0	0	0.00124	0	0	0	0	0	0	0.00315	0	0	0	0	0	0	0	0	0	0	0	0	0	0	0	0	0	0	0	0	0	0	0
k__Bacteria|p__Proteobacteria|c__Gammaproteobacteria|o__Pseudomonadales|f__Moraxellaceae|g__Acinetobacter|s__Acinetobacter_johnsonii	0	0	0	0	0	0	0	0	0	0	0	0	0	0	0	0	0	0.00225	0	0	0	0	0	0	0	0	0	0	0	0	0	0	0	0	0	0	0	0	0	0	0	0	0	0	0	0	0	0	0
k__Bacteria|p__Proteobacteria|c__Gammaproteobacteria|o__Pseudomonadales|f__Moraxellaceae|g__Acinetobacter|s__Acinetobacter_soli	0	0	0	0	0	0	0	0	0	0	0	0	0	0	0	0	0	0.03678	0	0	0	0	0	0	0	0	0	0	0	0	0	0	0	0	0	0	0	0	0	0	0	0	0	0	0	0	0	0	0
k__Bacteria|p__Proteobacteria|c__Gammaproteobacteria|o__Pseudomonadales|f__Pseudomonadaceae|g__Pseudomonas|s__Pseudomonas_caeni	0	0	0	0	0	0	0	0	0	0	0	0	0	0	0	0	0	0	0	0	0	0	0	0	0	0	0	0	0	0	0	0	0	0	0	0	0	0	0	0	0	0	0	0	0	0	0	0	0
k__Bacteria|p__Proteobacteria|c__Gammaproteobacteria|o__Pseudomonadales|f__Pseudomonadaceae|g__Pseudomonas|s__Pseudomonas_unclassified	0	0	0	0	0	0	0	0	0	0	0	0	0	0	0	0	0	0	0	0	0	0	0	0.0215169	0	0	0	0	0	0	0	0	0	0	0	0	0	0	0	0	0	0	0	0	0	0	0	0	0
k__Bacteria|p__Proteobacteria|c__Gammaproteobacteria|o__Vibrionales|f__Vibrionaceae|g__Vibrio|s__Vibrio_parahaemolyticus	0	0	0	0	0	0	0	0	0	0	0.00068	0	0	0	0	0	0	0	0	0	0	0	0	0	0	0	0	0	0	0	0	0	0	0	0	0	0	0	0	0	0	0	0	0	0	0	0	0	0
k__Bacteria|p__Synergistetes|c__Synergistia|o__Synergistales|f__Synergistaceae|g__Pyramidobacter|s__Pyramidobacter_piscolens	0	0	0	0.00125908	0	0	0	0	0	0	0	0	0	0	0	0	0	0	0	0.00317653	0	0	0	0	0	0	0	0	0	0	0	0	0	0	0.00608	0	0	0	0	0	0	0	0	0	0	0	0	0	0.09221
k__Bacteria|p__Verrucomicrobia|c__Verrucomicrobiae|o__Verrucomicrobiales|f__Verrucomicrobiaceae|g__Akkermansia|s__Akkermansia_muciniphila	0.0212131	0.0116637	1.60337	0	0.0718184	0	0	0.0217227	0	0	0	0	0	0	0.38889	0	0	0	0	0	0	0.48531	0	0.00313101	0.00393	4.41805	0.0183	0.00759163	0.0029771	0	1.12935	0	0	0	0	0	0.13728	0	0	0	0.0159036	0	0	0	0	0	0	0	0
[truncated: 12 more columns]

## Sheet: Table S5
Table S5 Differentially abundant species between control and patient groups
Species	P value	Q value (<0.1)	H01	H02	H03	H04	H05	H06	H07	H08	H09	H10	H11	H12	H13	H14	H15	H16	H17	H18	H19	H20	H21	H22	H23	H24	H25	H26	H27	H28	H30	H31	H32	P02	P03	P05	P13	P14	P15	P20	P21	P22	P25	P27	P29	P30	P31	P32	P33
Haemophilus parainfluenzae	2.5649e-07	2.20582e-05	0.233434	0.00682054	0.699218	0.549865	6.94134	0.02625	0	0.00024003	0	0.24213	0.02126	1.05756	0.711457	1.89676	0.03904	0.0793409	0.2424	0.01365	0.86203	1.00752	0.41074	0.04454	0.177861	0.260104	0.07786	0.20021	0.25806	0.00441677	0.273011	0.16281	0.19284	0	0	0	0.79009	0	0	0.0155	0.08723	0	0	0	0	0	0.00399626	0	0
Roseburia inulinivorans	2.91503e-06	0.000125346	0.95802	1.07448	0.485842	1.63417	2.39332	0.10752	0.3032	0.155219	0.88506	0.64306	0.35265	0.49134	3.35168	3.06582	2.09942	0	0.01335	1.56149	0.00834	2.34668	5.84251	1.65353	0.873957	10.9785	1.51363	0.32445	3.39295	1.67647	11.1131	0	3.82765	1.68968	0	0	3.10472	0.18681	0.00808	0	1.36442	0	0	0	0	0	0.223851	0	0
Eubacterium eligens	3.37918e-05	0.000968698	0.00745459	0.86531	21.5069	4.81137	5.38028	0.92324	6.26771	1.65995	0.74011	0.27152	3.33003	0.89611	0.102172	0.391582	0.01061	0.0355504	0.00571	1.73255	0.30499	11.0065	0.00601	0.0382	1.30018	0.460158	0	0.62293	0.15775	0	0.491942	0	0.19468	2.34042	0	0	0.00554	0.749	0	0	0.28698	0	0	0	0	0.4004	0.026706	0	0
Roseburia hominis	4.62779e-05	0.000994976	0.0249354	0.758371	1.60875	0.0350729	0.01458	0.03304	1.27695	0	0.55289	0.00942	1.28583	0.57163	0.0072757	0.0225301	0.00418	0	0.03628	0.13461	0	2.04474	0.6139	0.0147	0.0749669	0.0325005	0.09084	0.19781	0.10396	0.0328203	0.0392836	0	0.34465	0.414944	0	0	0.01233	0.1738	0	0	0.06169	0	0	0	0	0	0.776339	0	0
Roseburia intestinalis	0.000189854	0.00326549	0.0479895	0.0509585	3.58851	0.366644	21.9699	0	3.06531	0.183253	0	0	0.35954	0.39962	6.98462	0.134281	0	0.980881	11.3376	2.28734	0.02057	0	0.12725	0.65227	0.0158599	18.0363	0	0.59353	27.7072	6.25223	17.0941	9.86752	2.87013	0.474782	0	0	0	0.96525	0.09609	0	0.24768	0	0	0.42279	0	1.84372	0.103325	0	0
Megamonas unclassified	0.000365489	0.00523868	10.1811	0	0.0038201	3.12014	0	0	7.19691	14.9611	4.62719	5.40987	0	11.9529	0.00263013	2.61394	0.00168	17.2893	0	2.25087	0	0	4.00818	0	0.30373	7.48306	16.8615	0	0.00286	2.1669	7.80333	0.00489	0	0	0	0	7.114	0	22.8212	0	0	23.4516	0	0	0	0	1.32515	0	0
Eubacterium rectale	0.00042808	0.00525927	1.14011	0.155043	16.7595	31.4298	0.475391	0.01107	0	4.28763	2.23274	1.62832	0.22543	9.82528	0	6.26075	0.01845	3.1817	0	9.91926	0.07063	5.51484	26.2847	13.014	8.44276	0.235076	15.0594	12.3242	5.32076	6.35999	0.231141	0.05642	0.00505	0.109155	0	4.49533	0.74373	1.5674	0	0	0.47695	0	5.15203	0	0	0	5.7448	0	0.48234
Ruminococcus obeum	0.00046359	0.00498359	0.0880042	0.435457	0.161624	0.108805	0.254679	0.00713	0.054	0.594904	0.09412	0.03962	0.4212	0.33006	0.209101	0.0302201	0.35727	0.0183102	0.16286	0.0851	0.03662	0.314353	0.39514	0.13303	0.123427	0.131792	0.06373	0.05845	0.19996	0.092001	0.109351	0.07795	0.14286	0.356601	0	0.126302	0.04961	0.03036	0.04118	0	0.04027	0.00577	0.0250757	0.17373	0	0.04621	0.163451	0.01454	0.09025
Dorea formicigenerans	0.0013005	0.012427	0.0430965	0.353558	0.229366	0.14279	0.0839149	0	0.04542	0.0181523	0.02966	0.08781	0.51406	0.37935	1.16132	0.0515002	0.19763	0.0158702	0.05224	0.05414	0.07083	0.0891189	0.49182	0.02662	0.0596773	0.107124	0.04577	0.02272	0.15613	0.162799	0.123825	0	0.07652	0.307492	0	0.153403	0.04429	0.01119	0	0	0.00844	0	0	0	0	0	0.0597005	0.05885	0.62588
Coprobacillus unclassified	0.00168507	0.0144916	0.00918565	0	0	0	0	0.0484	0	0	0	0	0	0	0	0	0	0	0	0	0.00405	0	0	0	0	0	0	0	0	0	0	0.01612	0	0	4.95503	0.037103	0	0	0	0.29267	0.01811	0.40956	0.0414794	0.12989	0	0.0134	0	0.00068	0
Coprococcus sp_ART55/1	0.00202528	0.015834	0	1.23732	0	0.464912	1.74715	0	1.07212	0	0	0	0	1.09812	0	0.377642	30.2963	0	0	8.73082	0	6.95122	0	0	0	0	0	5.61215	0	0.508139	0	0	0	0	0	0	0	0	0	0	0	0	0	0	0	0	0	0	0
Megamonas funiformis	0.00216844	0.0155405	2.02163	0	0	0.447064	0	0	0.20517	0	0.40425	1.37227	0	0.91888	0	0.422382	0	0.276363	0	0.01327	0	0	1.04874	0	0.0326404	0.442372	0	0	0	0.520938	0.420893	0	0	0	0	0	0	0	0	0	0	1.79773	0	0	0	0	0.171393	0	0
Sutterella wadsworthensis	0.00331748	0.0219464	0.623764	0	2.33843	0	3.00225	0	0	0	0	0	0	3.3723	0	0	3.07742	0	0	1.04499	1.02102	0	0	4.80542	1.12632	4.78667	0	0	8.21861	1.01768	5.36424	0	0	0	0	0	0	0.00198	0	0	0	0	0	0	0	0	0	0	0
Bifidobacterium adolescentis	0.00394559	0.0242372	0.0412054	0	0.642306	0	1.72693	0	0	0.693226	0.76086	0	0	0.80221	3.19496	0.311731	1.52268	0	0.06065	0	18.4875	0	0	0	0.905677	2.97047	0.87946	1.08585	4.07974	0.570094	3.56829	0	0	0	0	0	0	0	0	0	0	0	18.8802	0	0	0	0	3.49318	0
Megamonas hypermegale	0.00752454	0.0431407	1.07093	0	0	0.66703	0	0	3.08042	4.79507	0.29002	0.17534	0	4.09648	0	0.147871	0	4.89845	0	0.69865	0	0	0.04666	0	0.242071	0.996841	0.77814	0	0	0.00664018	1.24065	0	0	0	0	0	2.5483	0	3.50689	0	0	8.66707	0	0	0	0	0.0476001	0	0
Collinsella aerofaciens	0.0092574	0.0497585	0.230242	0.162414	0.106193	0.194361	0	0	0.04319	0.180282	0.25459	0.13923	0.09338	1.12195	1.37062	0.501402	0.19231	0	0	0.15137	1.42561	0	1.72647	0.40629	0.209691	0.451045	0.1151	0	5.06123	0.134817	0.504132	0.44985	0	0.218861	0	0.267909	0.08961	0	0.08242	0	0	0	0	0.10372	0	1.33802	0.375009	0	0.05447
Clostridium bolteae	0.00953588	0.0482403	0.102113	0	0	0	0	0.0801	0.00182	0.0144518	0	0.01419	0.02774	0.00587	0.0143599	0	0.0057	0	0.12274	0	0	0	0.00055	0.00242	0	0.0121739	0.01267	0	0.06436	0.00160246	0.0105151	0.68664	0.00707	0	0	0.0133699	0.00089	0.00447	0.3789	6.44847	0.0454	0.02102	0	0.11806	1.46197	0.39844	0.0290388	0	0.5874
Bifidobacterium longum	0.0105102	0.0502155	1.06645	6.92175	0.316608	0.71701	6.12194	0.202	0	0.23972	0.37083	0.04034	0.03789	1.0928	2.51979	0.222051	0.42639	0.0118101	0.74918	0	1.77724	0.568248	2.30724	0.99351	0.249486	2.95065	0.26896	3.02369	5.31607	0.654423	3.53138	2.60505	0.38363	0.114858	0	0	0.19908	0.01149	0.0803	0	0.2906	52.3869	10.5794	0	0	2.48349	0.220088	1.54532	0.0263
Akkermansia muciniphila	0.0119234	0.0539692	0.0212131	0.0116637	1.60337	0	0.0718184	0	0	0.0217227	0	0	0	0	0	0	0.38889	0	0	0	0	0	0	0.48531	0	0.00313101	0.00393	4.41805	0.0183	0.00759163	0.0029771	0	1.12935	0	0	0	0	0	0.13728	0	0	0	0.0159036	0	0	0	0	0	0
Megamonas rupellensis	0.0120907	0.0519899	0	0	0	1.66064	0	0	0.05186	0.0173122	0.00142	0	0	0.00452	0	0.0253801	0	0.121601	0	0	0	0	0.00985	0	0.0587067	2.12213	4.5024	0	0	0.0899879	1.91251	0	0	0	0	0	0	0	3.53147	0	0	0.03783	0	0	0	0	0.0139362	0	0
Coprococcus comes	0.0136105	0.0557382	0.123406	0.933452	0.627616	0.685412	0.259575	0	0.77486	1.7839	0.35007	1.83422	0	0.41388	0	0.724563	0.22991	0.113821	0.67579	0.43204	0.66989	0.662644	2.07413	1.65164	0.211432	0	0.27501	0.4781	0	0.462278	0	0	0.57407	0.360859	0	0.224392	0.26189	0.0763	0.06147	0	0.20757	0	2.8495	0.49599	0	0	0.274738	0.13147	0.26726
Lachnospiraceae bacterium 1_1_57FAA	0.016424	0.0642029	0.258599	1.04627	0.485102	0.229807	0	0.04459	1.5296	2.14623	0.01167	0.11395	0.50905	0	0.0268153	0.147041	1.11574	0.154372	0.14605	0.13918	0	0	0.11711	0	0	0.0871781	0.04466	0.01996	0.43779	0.289754	0.50757	0	0	0.132443	0	0	0.26127	0.02647	0.25697	0	0.04108	0	0	0	0	0	0	0	0.0637
Ruminococcus lactaris	0.0173429	0.0648475	0	0.134698	0	0.534041	0.90574	0	2.00256	0.747383	0	0	0	0	0	1.63081	0.13431	0	0	0.11805	0	0	0	0.73831	0.238419	0	0	0	0	0	0	0	0.25788	0	0	0	0.78871	0	0	0	0	0	0	0	0	0	0	0	0
Bifidobacterium pseudocatenulatum	0.0218802	0.0784039	1.36961	6.53163	0.133703	0.246306	0.429248	0.30262	0	0.088501	0.07684	0	0	0.03347	0	0.0148001	0.08344	0.0088301	0.69959	0	0.19718	0.256875	0.94524	0.51305	0	0.21871	0.05882	0	0.94246	0.126704	0.214491	1.16832	0.42893	0	0	0	0.01869	0	0	0	0	0.58639	0	2.57665	0	2.29555	0.0363112	0.1081	0.01082
Dorea longicatena	0.0280798	0.0965944	0.339719	0.537131	0.142834	0.505263	0.032144	0	0.06385	0.334292	0.76613	0.04164	0.03763	0.18098	0.124423	0.128261	0.08079	0.0567207	0.0583	0.07445	0.06885	0.081938	0.63353	0.06733	0.0822114	0.0120039	0.02139	0.04282	0.19145	0.106683	0.0170306	0.25824	0.14232	0.382505	0	0.418435	0.10948	0.01126	0.00713	0	0.03269	0	0	0.38667	0	0	0.199965	0.05047	0.3589
[truncated: 14 more columns]

## Sheet: Table S6
Table S6 Relative abundance of 110 differentially abundant pathways between controls and patients
Pathway	Class 1	Class2	Class 3	Class 4	P value	Q value	H01	H02	H03	H04	H05	H06	H07	H08	H09	H10	H11	H12	H13	H14	H15	H16	H17	H18	H19	H20	H21	H22	H23	H24	H25	H26	H27	H28	H30	H31	H32	P02	P03	P05	P13	P14	P15	P20	P21	P22	P25	P27	P29
ARGORNPROST-PWY: arginine, ornithine and proline interconversion	Activation/Inactivation/Interconversion	Interconversions			0.0146653	0.0725649	0.000193778	0.000520351	0.000167861	0.000251749	0.000402229	5.35e-05	6.6e-05	0.000101113	0.000139097	0	0.000368508	0.000428754	4.36e-05	0.00021311	0.000450498	0	0.000219959	0.000507707	0	0.000496849	0	0.000123948	0	0	0.000132446	0.000632846	0	0.000134494	0	0	0	0.000143756	0	0	0.000199977	0	0	0	5.25e-05	6.71e-05	0	0	0
PWY-2942: L-lysine biosynthesis III	Biosynthesis	Amino Acids Biosynthesis	Proteinogenic Amino Acids Biosynthesis	L-lysine Biosynthesis	0.0120925	0.0631127	0.0113474	0.0118379	0.0131624	0.00847388	0.00802081	0.00944628	0.020989	0.013303	0.0203237	0.0279206	0.0154988	0.0168545	0.0114015	0.00894549	0.01319	0.022285	0.0141682	0.0111914	0.0184964	0.00945761	0.0143325	0.0187051	0.0309395	0.00797169	0.0114154	0.0131736	0.0105665	0.0141709	0.00800735	0.0171464	0.012098	0.014854	0.0236817	0.0293634	0.0172001	0.0380396	0.0142474	0.0163511	0.0134117	0.00886696	0.0136586	0.0137214	0.0146063
PWY-5104: L-isoleucine biosynthesis IV	Biosynthesis	Amino Acids Biosynthesis	Proteinogenic Amino Acids Biosynthesis	L-isoleucine Biosynthesis	0.000355665	0.00752824	0.00100885	0.00571714	0.00450641	0.00090528	0.00422899	0.00047339	0.00339611	0.000656125	0.000661483	0.00349445	0.00155145	0.000928405	0.0017112	0.000638392	0.00798922	0.000640269	0.0027058	0.00332685	0.000298068	0.00477624	0.000551573	0.00152104	0.000999845	0.00412161	0.000761305	0.00358332	0.00641875	0.0040877	0.00368789	0.00266962	0.00367177	0.00513855	0.000263307	0.00102401	0.00133808	0.00126118	0.000208022	0	0.000469256	0	0	0.0031871	0.00153064
PWY-5505: L-glutamate and L-glutamine biosynthesis	Biosynthesis	Amino Acids Biosynthesis	Proteinogenic Amino Acids Biosynthesis	L-glutamate Biosynthesis	0.00845133	0.0519348	0.000626483	0.000450971	0.000648404	0.000986654	0.000983737	0.00157136	0.000228861	0.00128055	0.0010015	1.47e-05	0.000430443	0.000506403	0.00117333	0.0010233	0.000672703	0.000454863	0.000232807	0.000478158	0.000150773	0.0011676	0.000438013	0.000977346	0.00080507	0.00107734	0.000612694	0.000909332	0.000213918	0.00087755	0.0010502	2.58e-05	0.000403649	0.000387428	0	0.000965705	7.91e-05	5.71e-05	0.000834695	0	3.68e-05	7.52e-05	8.71e-05	0.000625182	0.000578763
TRPSYN-PWY: L-tryptophan biosynthesis	Biosynthesis	Amino Acids Biosynthesis	Proteinogenic Amino Acids Biosynthesis	L-tryptophan Biosynthesis	3.73272e-05	0.00237028	0.00799179	0.00344126	0.0041488	0.00324256	0.00589564	0.00391937	0.00778095	0.00669166	0.00618403	0.00582278	0.00424129	0.00525248	0.00357314	0.00427631	0.00681503	0.00929865	0.00450224	0.00419248	0.00279052	0.0048276	0.00478607	0.00122654	0.00262622	0.00469991	0.00600909	0.00192311	0.00790949	0.00544367	0.00472275	0.00537466	0.00325025	0.00449062	0.000206827	0.00642212	0.00529601	0.0011779	0.00783605	0.000747985	0.00145553	0.0033503	0.00059266	0.00416169	0.000963626
HSERMETANA-PWY: L-methionine biosynthesis III	Biosynthesis	Amino Acids Biosynthesis	Proteinogenic Amino Acids Biosynthesis	L-methionine Biosynthesis	0.000397846	0.00721806	0.000935405	0.00416975	0.00181685	0.00318056	0.00198816	0.00162341	0.00216383	0.00229802	0.000970587	0.00116831	0.00258266	0.00265355	0.00203964	0.00168047	0.00328559	0.000805898	0.00233834	0.00174608	0.00104572	0.00229793	0.00229436	0.000621359	0.000928427	0.00281746	0.00138704	0.00177873	0.00141356	0.00140853	0.00285884	0.00125611	0.00185327	0.00354394	0.000211399	0.0010641	0.00253206	0.000452123	0.000689058	0.000138537	0.00103124	0.000749744	0.000385768	0.00153053	0.00255008
METSYN-PWY: L-homoserine and L-methionine biosynthesis	Biosynthesis	Amino Acids Biosynthesis	Proteinogenic Amino Acids Biosynthesis	L-methionine Biosynthesis	0.0270697	0.0982244	0.00681873	0.00635901	0.00334626	0.00496587	0.00327479	0.00313322	0.00277554	0.00396404	0.00302613	0.00219526	0.0018828	0.00340296	0.00453418	0.00360434	0.00538881	0.00223723	0.00181671	0.00381635	0.00414086	0.00387704	0.00428945	0.0011877	0.00174324	0.00458781	0.00383468	0.00315698	0.00252841	0.00192997	0.00462137	0.00244123	0.00327482	0.00524597	0.0013905	0.0013119	0.00387635	0.000889373	0.00368864	0.00256702	0.00136843	0.00307338	0.00552133	0.00306801	0.00143369
PWY-4981: L-proline biosynthesis II (from arginine)	Biosynthesis	Amino Acids Biosynthesis	Proteinogenic Amino Acids Biosynthesis	L-proline Biosynthesis	0.0198232	0.0839181	0.000529271	0.00123844	0.000885384	0.000630645	0.000461989	7.88e-05	0.000274511	0.000643447	0.000284376	0.00039232	0.00108075	0.00130314	0.0015803	0.00066421	0.000797504	0.000141897	0.000686086	0.000319667	0.0022529	0.000636588	0.00110546	0.000420712	0.000340856	0.00139242	0.000278971	0.00133021	0.00262816	0.000585033	0.00121727	0.000469112	0.000445769	0.000836028	0.000168904	0.00122809	0.000758736	1.73e-05	0.000167156	4.98e-06	0.000125603	3.96e-05	1.48e-05	0.000461753	0.000661024
PWY-5345: superpathway of L-methionine biosynthesis (by sulfhydrylation)	Biosynthesis	Amino Acids Biosynthesis	Proteinogenic Amino Acids Biosynthesis	L-methionine Biosynthesis	0.0205887	0.0852641	0.00116872	0.00103723	0.00129023	0.0032317	0.00227317	0.00261029	0.000246816	0.000564204	0.00194426	0.000288471	0.00174654	0.00224168	0.00420795	0.00278412	0.00208203	0.000964111	0.00237946	0.00267285	0.00184554	0.00212714	0.000266516	0.000543689	0.00152898	0.00329164	0.00139486	0.00122883	0.000285067	0.00173602	0.00331798	0.000162029	0.000845908	0.00172643	0	0.0015014	0.00360782	0.000247478	0.00125856	0.00045694	0.000283801	0.00084122	0.000226288	0.00101689	0.000561136
GOLPDLCAT-PWY: superpathway of glycerol degradation to 1,3-propanediol	Biosynthesis	Amino Acids Biosynthesis	Proteinogenic Amino Acids Biosynthesis	L-methionine Biosynthesis	0.000128003	0.0040641	0.0021683	0.000110315	0.000104337	0.00194279	0.000303396	0.000289982	0.00211818	0.00305875	0.00111587	0.00200775	6.41e-05	0.00260291	0.00164932	0.000532776	0.00028704	0.00544844	0.000158802	0.00106645	0.000365134	7.2e-05	0.000825041	0.000114887	0.000373319	0.00179134	0.00210923	7.37e-05	0.000225462	0.000556417	0.00195453	6.64e-05	0.000141453	0.000114529	0	0	0.00192919	0.000136827	0.00477104	6.96e-05	4.78e-05	0.00491075	1.07e-05	6.87e-05	3.11e-05
ARGININE-SYN4-PWY: L-ornithine de novo biosynthesis	Biosynthesis	Amino Acids Biosynthesis	Other Amino Acid Biosynthesis	L-Ornithine Biosynthesis	0.00146812	0.0159816	0.00373121	0.00306314	0.00135605	0.00201908	0.00112394	0.00599787	0.00186254	0.00484737	0.00101077	0.00141928	0.00454904	0.00127276	0.00147082	0.000983406	0.00339864	0.00128301	0.00356202	0.000373393	0.000106559	0.00389828	0.00128623	0.00662055	0.00195424	0.00103669	0.00487238	0.00294611	0.00270932	0.00520568	0.00111384	0.00756418	0.00322568	0.00363478	0.0162917	0.00163259	0.00162922	0.00270084	0.00230011	0.0137999	0.00509859	5.24e-05	0.00528976	0.00514499	0.00574609
CITRULBIO-PWY: L-citrulline biosynthesis	Biosynthesis	Amino Acids Biosynthesis	Other Amino Acid Biosynthesis	L-citrulline Biosynthesis	0.000336934	0.00755129	0.00198746	0.000544635	0.000447629	3.31e-05	0.000262023	0.000369294	0.00108952	0.00122033	0.000275412	0.000199622	0.00125107	0.000241385	0.000207533	0.000134954	0.00058443	0.00011248	0.000760604	0.000128136	0	0.0007608	0.000345312	0.000608414	0.000353841	0.000205051	0.000248728	0.000129334	0.000956507	0.000794882	0.000165485	0.00159251	0.00145314	0.000645713	0	0.00118435	0.00144689	0.000597873	0.00206283	0.00377817	0.00166347	1.99e-05	0	0.00116995	0.00653015
PWY-6936: seleno-amino acid biosynthesis	Biosynthesis	Amino Acids Biosynthesis	Other Amino Acid Biosynthesis		0.0131608	0.0677606	0.000710735	0.0045776	0.00212295	0.0038704	0.00256585	0.00303892	0.00115039	0.0019557	0.00152079	0.00177409	0.000994044	0.00081362	0.00312626	0.00240932	0.00306394	0.000548802	0.000444542	0.00191263	0.00117737	0.00237245	0.00192819	0.000569579	0.00159716	0.00305148	0.00105853	0.00175722	0.00169156	0.000782164	0.00302146	0.00179929	0.00387517	0.00322856	0.000143353	0.000623153	0.0017645	0.000422378	0.00140855	0.000101866	0.000536693	0.00680264	0.00160126	0.00209086	0.000467124
P4-PWY: superpathway of L-lysine, L-threonine and L-methionine biosynthesis I	Biosynthesis	Amino Acids Biosynthesis			0.0131608	0.0668571	0.00224432	0.0018698	0.00208674	0.00360436	0.00336537	0.00294049	0.00104692	0.00159435	0.00247902	0.000594249	0.00161648	0.00226531	0.00392288	0.00313887	0.00276996	0.00164393	0.00164198	0.0030074	0.00412917	0.00283825	0.00276653	0.000608414	0.00126928	0.00387829	0.00180419	0.00206443	0.00245674	0.000702676	0.00382513	0.00192274	0.00207791	0.00209687	0	0.000131555	0.0012675	0.000493766	0.00153897	0.00174918	0.000935701	0.00190858	0.00432689	0.0019819	0.000757974
PWY-821: superpathway of sulfur amino acid biosynthesis (Saccharomyces cerevisiae)	Biosynthesis	Amino Acids Biosynthesis			0.00397462	0.0302866	0.000416936	0.000548104	0.000434464	0.000417039	0.00132851	0.000172502	7.36e-05	0.000290343	0.000871674	0.000134716	0.000199428	0.000766356	0.000159458	0.00116178	0.000663572	2.97e-05	0.000508783	0.00055606	0.000576266	0.00102786	7.21e-05	0.000123948	0.00049343	0.000302368	0.000458869	0.000592909	8.55e-05	7.38e-05	0.000297025	6.76e-05	0.000252719	0.000302805	0	0	0.000638161	5.21e-05	0.000221716	9.87e-05	0.000119702	6.04e-05	2.39e-05	0	0.000179211
PWY-6163: chorismate biosynthesis from 3-dehydroquinate	Biosynthesis	Aromatic Compounds Biosynthesis	Chorismate Biosynthesis		0.00406539	0.0303709	0.00981097	0.0102066	0.0154192	0.0114326	0.009904	0.00664815	0.0148002	0.0111199	0.0115603	0.0169807	0.0112655	0.0118258	0.00978206	0.00876785	0.0115835	0.0139649	0.00905466	0.0103802	0.011143	0.0096979	0.0154046	0.0119898	0.0190141	0.0105739	0.0105054	0.0106724	0.0133884	0.0133237	0.0106371	0.0111397	0.0122956	0.0125166	0.00738038	0.017352	0.0107538	0.0119706	0.00966362	0.00595786	0.0078697	0.0103474	0.00865286	0.00781836	0.0095077
ARO-PWY: chorismate biosynthesis I	Biosynthesis	Aromatic Compounds Biosynthesis	Chorismate Biosynthesis		0.00974596	0.0554211	0.0099551	0.0106568	0.0153663	0.0109821	0.00996445	0.00681188	0.0145271	0.0111262	0.0112285	0.0155559	0.0116854	0.0111004	0.00937799	0.00886084	0.0108686	0.0130572	0.009575	0.00961482	0.0123366	0.0101259	0.0154125	0.0111921	0.0162584	0.0104265	0.0102702	0.0114652	0.0129258	0.0132931	0.0104875	0.0107743	0.012741	0.0124054	0.00840042	0.0163051	0.0111426	0.0115353	0.00961645	0.00520859	0.00884766	0.0109272	0.00969583	0.00865467	0.0104047
POLYAMINSYN3-PWY: superpathway of polyamine biosynthesis II	Biosynthesis	Amines and Polyamines Biosynthesis			0.000513964	0.00851392	0.00014798	5.13e-05	0.000529914	0.000259378	0.00137218	0.000262719	0.00100431	0.00112841	0.000125805	0.00022818	0.00107766	0.000344354	0.000184448	0.000140118	5.11e-05	0.000355979	0.000115632	0.000545315	0.000120221	0.000360216	0.000201162	5.66e-05	0.000296058	0.00176085	0.00026046	0.000175415	0.000402864	0.00073765	0.00175563	4.07e-05	0.000168831	0.00130162	0	0.00164352	0.000253794	0.000577052	5.89e-05	0	5.87e-05	0	0.000359906	0.000104543	3.29e-05
POLYAMSYN-PWY: superpathway of polyamine biosynthesis I	Biosynthesis	Amines and Polyamines Biosynthesis			7.51594e-05	0.00357947	0.00353427	0.00222017	0.00175102	0.00194279	0.00233713	0.000884818	0.00291554	0.00311897	0.00185772	0.00175102	0.00190138	0.00246787	0.0016398	0.00125566	0.000809679	0.00435711	0.000842832	0.00127598	0.000568814	0.000922276	0.00195831	0.00084466	0.00107775	0.00346603	0.00329329	0.00134557	0.00151957	0.00283614	0.00349389	0.00201533	0.00206738	0.00205269	0.000253625	0.0017492	0.00226444	0.00134745	0.00423951	7.65e-05	0.000570412	0.00576797	0.00124135	0.000298323	0.000269698
ARG+POLYAMINE-SYN: superpathway of arginine and polyamine biosynthesis	Biosynthesis	Amines and Polyamines Biosynthesis			0.000397846	0.00757896	0.00429523	0.00145005	0.0015667	0.00302552	0.00327111	0.00149948	0.00294597	0.00313799	0.0028283	0.00163563	0.0020717	0.00355215	0.00236807	0.00204426	0.00130279	0.0052169	0.00129251	0.00211142	0.00104572	0.00161165	0.0026787	0.000673139	0.00108749	0.00389117	0.00459377	0.00145923	0.00167271	0.00234331	0.00391381	0.00256777	0.000972267	0.00276977	0.000441087	0.00208447	0.00284673	0.00163894	0.00545513	0.000149015	0.000435537	0.00761173	0.00201289	0.000557735	0.000490627
TRNA-CHARGING-PWY: tRNA charging	Biosynthesis	Aminoacyl-tRNA Charging			0.0232057	0.0902182	0.00471433	0.0107582	0.0110464	0.00459323	0.00458707	0.00302057	0.00931453	0.00900879	0.00557207	0.00437408	0.00823316	0.00613291	0.00405442	0.00317011	0.00936068	0.00242264	0.00658586	0.00518917	0.00418006	0.00827201	0.0067846	0.00696062	0.00877419	0.0056525	0.00594892	0.0115027	0.00666909	0.00870227	0.0057582	0.00605068	0.00947332	0.011571	0.000185579	0.0110043	0.00729963	0.00603819	0.00224055	0.000261358	0.003689	0.00372189	0.00327032	0.0051694	0.00855021
OANTIGEN-PWY: O-antigen building blocks biosynthesis (E. coli)	Biosynthesis	Carbohydrates Biosynthesis	Sugars Biosynthesis	Sugar Nucleotides Biosynthesis	0.0206264	0.0845017	0.00186865	0.00414189	0.00199787	0.00394941	0.00364812	0.00234464	0.00243469	0.000805101	0.0027603	0.000522132	0.000857789	0.00272107	0.00302066	0.00310561	0.0050314	0.00162663	0.0033999	0.00317395	0.00616619	0.00390902	0.00175437	0.000770227	0.00189581	0.00422731	0.00182765	0.00320518	0.00446013	0.00317635	0.00443119	0.00343979	0.00216566	0.000849622	0.000125333	0	0.00117339	0.00108271	0.00153462	0.00243604	0.00063223	0.00722895	0.00475134	0.00306697	0.000546447
UDPNAGSYN-PWY: UDP-N-acetyl-D-glucosamine biosynthesis I	Biosynthesis	Carbohydrates Biosynthesis	Sugars Biosynthesis	Sugar Nucleotides Biosynthesis	0.0161979	0.0752612	0.00126161	0.00310476	0.00120136	0.00382346	0.00498973	0.00247352	0.00149124	0.000437417	0.00225646	0.000281547	0.00046141	0.00216065	0.00493561	0.00299493	0.00817624	0.00146347	0.00257788	0.0045998	0.0061026	0.00320141	0.00102667	0.000417476	0.00107126	0.00494636	0.00138182	0.00265119	0.00588678	0.00204762	0.00492388	0.00275912	0.00124254	0.00047239	9.44e-05	0	0.000685215	0.000606796	0.00138246	0.0018394	0.00033438	0.00748327	0.00404558	0.00229579	0.000296726
GLYCOCAT-PWY: glycogen degradation I (bacterial)	Biosynthesis	Carbohydrates Biosynthesis	Polysaccharides Biosynthesis	Glycogen and Starch Biosynthesis	0.000611607	0.00932088	0.000989412	0.000423219	0.000167532	0.00179276	0.00129173	0.00144248	0.00209383	0.00376873	0.00136315	0.00195872	0.00022544	0.00259616	9.35e-05	0.00131434	0.000508332	0.00214576	0.000968743	0.00144522	0.000154747	0.00107444	0.00156897	0.00116181	0.000792085	0.00200986	0.00275423	0.000307207	3.75e-05	0.00206987	0.00227277	0.000373438	0.000484379	0.000177061	0	0	0.00198506	0.000550281	0.00067819	8.06e-05	5.56e-05	0.000504015	0.00019741	0.000539576	0.000279099
PWY-5188: tetrapyrrole biosynthesis I (from glutamate)	Biosynthesis	Cofactors, Prosthetic Groups, Electron Carriers Biosynthesis	Tetrapyrrole Biosynthesis		0.00892554	0.0531349	0.00441006	0.00199468	0.00397844	0.00367114	0.00300304	0.0020274	0.00329571	0.00423708	0.00313725	0.00185198	0.0018828	0.00341737	0.00206581	0.00227897	0.00466902	0.00470805	0.00106382	0.0029238	0.00503018	0.00449748	0.00156433	0.00182524	0.00282099	0.00328549	0.00400311	0.00293075	0.001946	0.00103971	0.00353327	0.000740703	0.00262898	0.00363727	0.00530464	0.00348747	0.00294769	0.00148427	0.00454472	0.00124858	0.00143587	0.00587633	0.0011961	0.00138785	0.0010782
PWY-7371: 1,4-dihydroxy-6-naphthoate biosynthesis II	Biosynthesis	Cofactors, Prosthetic Groups, Electron Carriers Biosynthesis	Quinol and Quinone Biosynthesis	1,4-dihydroxy-6-naphthoate biosynthesis	0.0286521	0.0992406	0.00112983	0	0	0.000432297	2.78e-05	0.000166306	0.00123256	0.00166409	0.00056257	0.000801948	0.000579085	0.00121199	0	0.000267561	1.98e-05	0.003004	0	0.000247675	0	0.000242524	0.000410203	1.48e-05	9.64e-05	0.000815631	0.00186415	0	0	0.000362466	0.000875163	0	0	0.000253527	0	0	0.00114104	0.000259673	0.00317934	0	0.000144992	0.00410745	0	2.91e-05	0.000178036
PYRIDNUCSYN-PWY: NAD biosynthesis I (from aspartate)	Biosynthesis	Cofactors, Prosthetic Groups, Electron Carriers Biosynthesis	NAD Metabolism	NAD Biosynthesis	0.00247507	0.0214318	0.0054975	0.00456466	0.00316961	0.00179276	0.0033317	0.00294181	0.00806952	0.00631649	0.00581125	0.00418233	0.00513738	0.00662101	0.00144702	0.00348982	0.00622424	0.0104021	0.00222528	0.00539094	0.000650783	0.00341056	0.00260124	0.00312945	0.00620313	0.00295533	0.00380029	0.00494652	0.00448397	0.00542122	0.0029624	0.0023147	0.00254825	0.00434687	0	0.00518835	0.00613791	0.00472602	0.00905292	0.00025641	0.00098628	0.00649395	0.000573264	0.00342698	0.00500657
1CMET2-PWY: N10-formyl-tetrahydrofolate biosynthesis	Biosynthesis	Cofactors, Prosthetic Groups, Electron Carriers Biosynthesis	Vitamins Biosynthesis	Folate Biosynthesis	3.73272e-05	0.00284433	0.00801711	0.00731004	0.00768978	0.0075448	0.00506857	0.00834849	0.0068177	0.010567	0.00417148	0.00714458	0.0109035	0.00615097	0.00736967	0.00556624	0.00739736	0.00667879	0.00962288	0.00433313	0.00445749	0.00567026	0.00786005	0.0124635	0.00515086	0.00629616	0.00926237	0.00828414	0.00917714	0.00798736	0.00624233	0.0143672	0.00933647	0.0064278	0.0164838	0.00404463	0.00919838	0.0103335	0.0069711	0.0136054	0.0116534	0.00716237	0.00975189	0.0115975	0.0111572
PANTO-PWY: phosphopantothenate biosynthesis I	Biosynthesis	Cofactors, Prosthetic Groups, Electron Carriers Biosynthesis	Vitamins Biosynthesis	Pantothenate Biosynthesis	0.000896587	0.0117793	0.00891475	0.00861192	0.0125954	0.007909	0.00666215	0.00975324	0.0135387	0.0122929	0.00859334	0.0127101	0.0140345	0.0084445	0.0105412	0.00909723	0.0117825	0.0109343	0.0143698	0.00804117	0.0130471	0.00743913	0.0132272	0.0127362	0.0104872	0.00750614	0.0106998	0.0139533	0.0108568	0.010638	0.0076123	0.0150459	0.0112571	0.0111162	0.0172736	0.0122965	0.0130856	0.013185	0.01086	0.0142667	0.0131747	0.00718126	0.0113245	0.0138071	0.0125472
PWY-3841: folate transformations II	Biosynthesis	Cofactors, Prosthetic Groups, Electron Carriers Biosynthesis	Vitamins Biosynthesis	Folate Biosynthesis	3.00522e-05	0.00381663	0.00858926	0.00810923	0.00800684	0.00797524	0.00591288	0.00791694	0.00680431	0.0111712	0.00481328	0.00790845	0.0110003	0.00638128	0.00758328	0.00585171	0.00696729	0.00805193	0.0102059	0.00465836	0.00599478	0.00589915	0.00807741	0.0128045	0.0055741	0.00637915	0.00966716	0.00938486	0.0099289	0.00862463	0.00644369	0.0142419	0.00959136	0.00682341	0.016986	0.00467048	0.00995958	0.0126458	0.00750472	0.015619	0.0111521	0.00757297	0.00954545	0.0117915	0.0114751
PYRIDOXSYN-PWY: pyridoxal 5'-phosphate biosynthesis I	Biosynthesis	Cofactors, Prosthetic Groups, Electron Carriers Biosynthesis	Vitamins Biosynthesis	Vitamin B6 Biosynthesis	0.00223429	0.0207626	0.00388093	0.00344126	0.00148113	0.00253529	0.00226168	0.00392809	0.00107735	0.00439813	0.00127969	0.00134716	0.00472004	0.00141793	0.0028116	0.00231887	0.00367211	0.000716903	0.00371175	0.00174071	0.000543975	0.00370817	0.00120048	0.00519981	0.000509661	0.00210895	0.00470059	0.00289389	0.00318906	0.00444097	0.00203409	0.00810666	0.00456815	0.00367726	0.0143645	0.000783496	0.00187037	0.00198101	0.00219579	0.012382	0.00578884	0.000803554	0.00545978	0.00549483	0.00526363
PWY-7282: 4-amino-2-methyl-5-phosphomethylpyrimidine biosynthesis (yeast)	Biosynthesis	Cofactors, Prosthetic Groups, Electron Carriers Biosynthesis	Vitamins Biosynthesis	Thiamine Biosynthesis	0.028117	0.0982804	0.00655412	0.00543344	0.00326835	0.00444849	0.00438177	0.00358111	0.00292162	0.00730413	0.00170626	0.00384774	0.00578781	0.00359246	0.00531609	0.00266728	0.00461228	0.00201722	0.00687781	0.00116316	0.00187783	0.00490986	0.00290248	0.0040535	0.00155495	0.0037706	0.00698508	0.00572763	0.00483331	0.00644656	0.00381107	0.00354997	0.00628973	0.00569631	0.012222	0.00235778	0.00435023	0.00389275	0.00610288	0.011715	0.00631865	0.000129322	0.00556521	0.00783646	0.00518404
PWY-6168: flavin biosynthesis III (fungi)	Biosynthesis	Cofactors, Prosthetic Groups, Electron Carriers Biosynthesis	Vitamins Biosynthesis	Flavin Biosynthesis	0.000331787	0.00790067	0.00555159	0.00545314	0.00393729	0.00299355	0.00387694	0.00557663	0.00365848	0.00520393	0.00422267	0.00395164	0.00818996	0.00547408	0.00270543	0.00352505	0.00471349	0.0016291	0.00550328	0.00307512	0.0025655	0.00504668	0.00443888	0.00655275	0.00235678	0.00342451	0.00285701	0.00327433	0.00498109	0.004936	0.00379153	0.00404455	0.00843447	0.00614548	2.88e-05	0.0050358	0.0064864	0.00626648	0.003301	0.0105441	0.00999101	0.00317126	0.00558911	0.0073401	0.00905286
PWY-5005: biotin biosynthesis II	Biosynthesis	Cofactors, Prosthetic Groups, Electron Carriers Biosynthesis	Vitamins Biosynthesis	Biotin Biosynthesis	0.0222145	0.0890917	0.00117736	0.000228608	0.000589159	0.00108583	0.000455093	0.000334595	0.00126908	0.00235191	0.0012766	0.00140485	0	0.00159348	0.000215149	0.000729926	0.000251731	0.00176259	0.000213021	0.000612472	0.000710396	0.000642798	0.00069526	0.00119418	0.000733652	0.000856286	0.000706553	0.00097999	0.000177873	0.000572315	0.000914943	0.000339489	0.000309581	0	0.000554048	0	0.0021027	0.000654388	0.00245009	5.33e-05	0.000525454	0.000857363	0.000480593	0.000252667	0.000124273
PWY-6415: L-ascorbate biosynthesis V	Biosynthesis	Cofactors, Prosthetic Groups, Electron Carriers Biosynthesis	Vitamins Biosynthesis	Ascorbate Biosynthesis	0.0197797	0.0846747	0.000183624	0.000251156	0.000120136	9.46e-06	7.47e-05	6.32e-05	3.47e-05	5.39e-05	0.000190408	0	5.88e-05	0.000168801	0	6.27e-05	0.000156761	0	8.89e-05	0	0	0.000191287	0	5.4e-05	0	0	0.000121496	0	0	1.59e-05	0	0	0	0.000115209	0	0	9.94e-05	0	0	0	3.74e-05	0	0	0	0
PWY-6263: superpathway of menaquinol-8 biosynthesis II	Biosynthesis	Cofactors, Prosthetic Groups, Electron Carriers Biosynthesis	Quinol and Quinone Biosynthesis	Menaquinol Biosynthesis	7.28991e-05	0.00396779	0.000665369	0.000235199	0.000209991	0.000656074	7.31e-05	9.89e-05	0.000136647	0.000235508	0.000905675	0	0.000199738	0.000884517	0	0.000382566	0.000273647	0.0010803	0	0.000467413	2.08e-05	0.000537218	5.28e-05	0	0.000129525	0.00105448	0.00136878	0.000123804	6.64e-05	0.000148166	0.00105285	7.44e-06	7.97e-05	0.000232117	0	0	9.59e-05	0	0.00193241	0	0	0.00116228	0	0	2.6e-05
PWY-6385: peptidoglycan biosynthesis III (mycobacteria)	Biosynthesis	Cell Structures Biosynthesis	Cell Wall Biosynthesis	Peptidoglycan Biosynthesis	9.21067e-05	0.00350927	0.00925722	0.00890238	0.00956748	0.00733325	0.00773454	0.00888052	0.00725558	0.00742008	0.00659044	0.0104533	0.0122612	0.00693488	0.00919949	0.00643075	0.00784725	0.00733592	0.0118384	0.00588392	0.00686183	0.00726027	0.0116467	0.0112278	0.00398344	0.00900952	0.00930865	0.00896104	0.0133668	0.00867843	0.00927742	0.0162718	0.0126832	0.00901887	0.0116437	0.00969072	0.00836241	0.0145899	0.00779425	0.0153328	0.0140465	0.00707687	0.0137155	0.0100033	0.0119974
PWY-5747: 2-methylcitrate cycle II	Biosynthesis	Fatty Acid and Lipid Biosynthesis	Fatty Acid Biosynthesis	Unsaturated Fatty Acid Biosynthesis	0.0147815	0.0722017	0.000115143	1.63e-05	4.41e-06	0.000237509	7.42e-05	9.39e-05	0	0	0.00016568	0	0	9.59e-05	5.05e-05	0.000246438	0.000120843	0.000180462	8.04e-05	0.000529197	0.000107801	0.000406795	7.81e-06	0	3.8e-05	8.79e-05	0	3.81e-05	0	0	8.14e-05	0	4.46e-05	1.06e-05	0	0	3.94e-05	1.04e-05	0	5.59e-05	0	9.52e-06	0	2.96e-05	0
PWY-5971: palmitate biosynthesis II (bacteria and plants)	Biosynthesis	Fatty Acid and Lipid Biosynthesis	Fatty Acid Biosynthesis	Palmitate Biosynthesis	0.00373659	0.0290539	0.00121624	0.000586263	0.00141859	0.00291902	0.00277163	0	0.000699972	0.000339157	0.00205863	0.000132408	0.0014152	0.00195134	0.00364055	0.00322104	0.00105624	0.00133739	0.0013953	0.00286237	0.00262993	0.00251219	0.000287374	0.00710926	0.00075313	0.0025871	0.00157736	0.000924692	0.000600762	0.000524622	0.00267561	0.000248753	0	0.000390826	0	0	0.00200859	0.000163895	0	0	0.00241371	0.00117304	7.8e-05	0	0
PWY-6113: superpathway of mycolate biosynthesis	Biosynthesis	Fatty Acid and Lipid Biosynthesis	Fatty Acid Biosynthesis		0.00128488	0.0143982	0.000946206	0.000219935	0.00143176	0.00289786	0.00173763	0	0.000477807	0.000348666	0.00174026	0.000136735	0.000820628	0.00186694	0.00273659	0.00281355	0.00097405	0.00122862	0.000747756	0.00264867	0.0015276	0.00224824	0.000301279	0.00588602	0.000756376	0.00191584	0.00158518	0.000930837	0.000605474	0.00053734	0.00174237	0.000255543	0	0.00031334	0	0	0.00139102	0.000168951	0	0	0.00135157	0.000948839	8.17e-05	0	0
PWY-6284: superpathway of unsaturated fatty acids biosynthesis (E. coli)	Biosynthesis	Fatty Acid and Lipid Biosynthesis	Fatty Acid Biosynthesis	Unsaturated Fatty Acid Biosynthesis	0.000424194	0.00734626	0.000531431	7.6e-05	0.0013758	0.00287068	0.000818249	0	0.000193253	0.000332817	0.00121478	0.000132119	0.000293878	0.00163399	0.00152794	0.00213815	0.000712274	0.00106052	0.000308353	0.0021544	0.000839559	0.00156197	0.000301279	0.00406489	0.000762869	0.00105193	0.00152522	0.000860179	0.000570135	0.000511904	0.000835383	0.000247518	0	0.000171284	0	0	0.000638161	0.000163002	0	0	0.000432727	0.000606252	9.07e-05	0	0
PWY-6285: superpathway of fatty acids biosynthesis (E. coli)	Biosynthesis	Fatty Acid and Lipid Biosynthesis	Fatty Acid Biosynthesis		0.000607282	0.0096406	0.000773383	0.000141189	0.00108287	0.00256797	0.00131931	0	0.000316509	0.000306826	0.00159189	0.000135581	0.000510957	0.0015631	0.00223479	0.00265923	0.000809679	0.00110749	0.000529339	0.00253048	0.0013264	0.00200603	0.000305914	0.00081877	0.000762869	0.00156012	0.00160083	0.000829458	0.000475898	0.000362466	0.00132866	0.000198447	0	0.000249789	0	0	0.00101165	0.000171033	0	0	0.000702478	0.000835839	8.79e-05	0	0
PWY-5989: stearate biosynthesis II (bacteria and plants)	Biosynthesis	Fatty Acid and Lipid Biosynthesis	Fatty Acid Biosynthesis	Stearate Biosynthesis	0.0223169	0.0885703	0.000872756	0.000586263	0.0026759	0.0032347	0.00233304	0.00245122	0.000483894	0.00117595	0.0013786	0.000640405	0.00109933	0.0017319	0.00247388	0.00224611	0.000712274	0.000919614	0.00112292	0.0019583	0.00097369	0.00184455	0.00522056	0.00397282	0.00161014	0.00189552	0.00265132	0.00161591	0.00118739	0.00171377	0.00203674	0.00102464	0.000228149	0.000263723	0	0.00134834	0.00147924	0.000767419	0.000989027	0.00190634	0.00199223	0.000812522	0.001681	0.000723758	0.000320229
PWY0-1319: CDP-diacylglycerol biosynthesis II	Biosynthesis	Fatty Acid and Lipid Biosynthesis	Phospholipid Biosynthesis	CDP-diacylglycerol Biosynthesis	0.00853857	0.051638	0.0113984	0.0118994	0.0145195	0.00994514	0.0100632	0.00882877	0.014956	0.0129697	0.010171	0.016325	0.0134782	0.0104209	0.010337	0.0108101	0.0117371	0.00879378	0.0148191	0.0101396	0.0098796	0.0113627	0.0149357	0.0205195	0.00928369	0.00895118	0.0109976	0.0129658	0.0112831	0.0141035	0.00917235	0.0136658	0.0107791	0.0130324	0.0210178	0.0153444	0.0137012	0.00852198	0.0110112	0.0170531	0.0118728	0.0070196	0.0117071	0.0154891	0.0141859
PWY-5667: CDP-diacylglycerol biosynthesis I	Biosynthesis	Fatty Acid and Lipid Biosynthesis	Phospholipid Biosynthesis	CDP-diacylglycerol Biosynthesis	0.00816643	0.0510067	0.0113984	0.0118994	0.0145195	0.00994293	0.010058	0.00882877	0.014956	0.0129697	0.010171	0.0163047	0.0134782	0.0104148	0.0103341	0.0108088	0.0117371	0.00878466	0.0148191	0.0101396	0.0098796	0.0113627	0.0149333	0.0205195	0.00928369	0.00892877	0.0109976	0.0129658	0.0112801	0.0141035	0.00917121	0.0136165	0.0107685	0.0130324	0.021004	0.0153444	0.0136954	0.00852198	0.0110112	0.0170531	0.0118512	0.00701694	0.0117071	0.0154891	0.0141859
PWY-5367: petroselinate biosynthesis	Biosynthesis	Fatty Acid and Lipid Biosynthesis	Fatty Acid Biosynthesis	Unsaturated Fatty Acid Biosynthesis	0.000701542	0.00989954	0.0001806	1.71e-05	0.0025245	0.00415824	0.000214216	0	6.91e-05	0.000858985	0.000488385	0.000467322	9.2e-05	0.00134366	0.000549773	0.000941159	0.000401796	0.000746568	7.63e-05	0.00131091	0.000226532	0.000729747	0.00486248	0.00194498	0.00252883	0.000337941	0.00262765	0.0012319	0.00100363	0.00131632	0.000236559	0.000824032	0	6.63e-05	0	0.00115885	0.000206447	0.00055623	0	0	0.000145273	0.000222412	0.00123273	0	0
PWY-5973: cis-vaccenate biosynthesis	Biosynthesis	Fatty Acid and Lipid Biosynthesis	Fatty Acid Biosynthesis	Unsaturated Fatty Acid Biosynthesis	0.0250744	0.0927509	0.00750545	0.00595435	0.00978205	0.00624147	0.00510192	0.00639336	0.00915351	0.00866117	0.00698891	0.0114965	0.0102341	0.0117743	0.00616786	0.00573837	0.00785961	0.0104571	0.00870807	0.00696131	0.00630407	0.00609795	0.00936276	0.00948699	0.0098386	0.0055421	0.00768696	0.00817754	0.00742087	0.011576	0.00570209	0.011375	0.00794974	0.00927828	0	0.0130077	0.0079969	0.0151708	0.00855245	0.00918464	0.0101177	0.00298551	0.00830907	0.00913741	0.00842621
PWY-7663: gondoate biosynthesis (anaerobic)	Biosynthesis	Fatty Acid and Lipid Biosynthesis	Fatty Acid Biosynthesis	Unsaturated Fatty Acid Biosynthesis	0.00201483	0.0196833	0.0066798	0.0053813	0.00876349	0.00571072	0.00484332	0.00615652	0.00785378	0.00794149	0.00593026	0.00982689	0.00937424	0.0104888	0.00707936	0.00583446	0.00711047	0.00906603	0.00895167	0.00620192	0.00537696	0.00552928	0.00871876	0.0083401	0.00825521	0.00502695	0.00721993	0.0074858	0.00665875	0.0110324	0.00515272	0.0106999	0.00721012	0.00837091	0	0.0112057	0.00701339	0.0130456	0.0077341	0.0163856	0.00938722	0.00259469	0.00776094	0.00908545	0.00764211
PPGPPMET-PWY: ppGpp biosynthesis	Biosynthesis	Metabolic Regulators Biosynthesis			0.0176372	0.0799971	0.000565995	0.000313598	0.000424589	0.00178259	0.00112394	0.00141273	2.4e-05	0.000858985	0.00141879	0.000747139	0.000165055	0.00147532	0.00218719	0.00145985	0.000557035	0.000467223	0.000444542	0.00179444	0.00113266	0.00110549	0.000115877	0.000877023	0.000869995	0.00167192	0.000649195	0.000746512	0.000233473	0.00123366	0.00179011	0.000170053	0.000121095	0.000669502	0	0.00177835	0.000112634	0.000142776	0.000715143	0.000972089	2.55e-05	0.000697728	7.8e-05	0.00128149	0.000282918
PWY-7211: superpathway of pyrimidine deoxyribonucleotides de novo biosynthesis	Biosynthesis	Nucleosides and Nucleotides Biosynthesis	Purine Nucleotide Biosynthesis	Purine Nucleotides De Novo Biosynthesis	0.0115872	0.0621794	0.00481904	0.0024179	0.00284705	0.00397238	0.00357193	0.00109301	0.00410443	0.00621601	0.00281285	0.00443529	0.0019757	0.00431955	0.00338368	0.00312223	0.00407232	0.00420899	0.00377201	0.00352926	0.00104324	0.00209608	0.00261394	0.00127184	0.00245741	0.00426489	0.00311661	0.00190161	0.00488469	0.00276937	0.00451473	0.0013703	0.00285362	0.00151912	1.63e-05	0.00313763	0.00501862	0.00115113	0.00476339	0.000494776	0.00201752	0.00601232	0.0010711	0.00476783	0.000260003
PWY-7228: superpathway of guanosine nucleotides de novo biosynthesis I	Biosynthesis	Nucleosides and Nucleotides Biosynthesis	Purine Nucleotide Biosynthesis	Purine Nucleotides De Novo Biosynthesis	0.0270697	0.0972978	0.00638717	0.00583883	0.00681186	0.00566207	0.00464264	0.00873206	0.0060477	0.00659882	0.00396417	0.0047261	0.00795055	0.00543833	0.00701446	0.0042266	0.00409765	0.00820001	0.00713714	0.00615975	0.00648227	0.00391259	0.00357952	0.0156753	0.00874147	0.00638886	0.00732599	0.00388319	0.00807389	0.0028584	0.00699415	0.0137151	0.00903408	0.00542684	0.00270451	0.0073477	0.00545128	0.00884459	0.00700414	0.00321497	0.012411	0.00681105	0.00924222	0.00558882	0.00729436
PWY-7229: superpathway of adenosine nucleotides de novo biosynthesis I	Biosynthesis	Nucleosides and Nucleotides Biosynthesis	Purine Nucleotide Biosynthesis	Purine Nucleotides De Novo Biosynthesis	0.0250744	0.0936602	0.00869157	0.00837093	0.009681	0.00752852	0.00659182	0.0103869	0.00930872	0.00982854	0.00606255	0.00854623	0.0106892	0.00794202	0.00791959	0.00629117	0.00716283	0.00747151	0.00989569	0.0080016	0.00874292	0.00738566	0.00575939	0.0154095	0.0102564	0.00788243	0.01007	0.00856855	0.0106449	0.00662143	0.00834126	0.0159736	0.0119976	0.00879943	0.00500787	0.0106995	0.00808454	0.0125924	0.00667056	0.00480678	0.0152361	0.00756567	0.0116395	0.0082357	0.00993011
PWY-6609: adenine and adenosine salvage III	Biosynthesis	Nucleosides and Nucleotides Biosynthesis	Purine Nucleotide Biosynthesis	Purine Nucleotide Salvage	0.00111937	0.0129237	0.00716732	0.00667202	0.00360904	0.00388436	0.00388303	0.0040858	0.00493319	0.00742915	0.00310563	0.00467893	0.00572857	0.00412083	0.00266821	0.00383092	0.00347651	0.00532402	0.00536167	0.00223499	0.00135124	0.00513639	0.00694483	0.0041988	0.00292163	0.0036122	0.00528184	0.00406444	0.00433698	0.00386103	0.00334843	0.00365793	0.00562307	0.0063881	0.00839544	0.00412349	0.006127	0.00399587	0.00568456	0.0140434	0.00917911	0.00979713	0.00827978	0.00517324	0.00694915
PWY-7196: superpathway of pyrimidine ribonucleosides salvage	Biosynthesis	Nucleosides and Nucleotides Biosynthesis	Pyrimidine Nucleotide Biosynthesis	Pyrimidine	0.000100379	0.00347677	0.00451805	0.00350679	0.00220852	0.00417751	0.00332905	0.000803028	0.00440158	0.00477387	0.00329153	0.00465288	0.0016041	0.00437053	0.00290464	0.00258568	0.00380431	0.00477237	0.00308291	0.00380872	0.000737719	0.0016955	0.00327898	0.000964401	0.0022951	0.0052272	0.00485877	0.00141315	0.00543694	0.00279798	0.00541546	0.00504891	0.00251666	0.00114189	0	0.00316678	0.00439779	0.00172223	0.00560626	0	0.000772726	0.00338043	0.000709037	0.00411385	0
PWY-7187: pyrimidine deoxyribonucleotides de novo biosynthesis II	Biosynthesis	Nucleosides and Nucleotides Biosynthesis	2'-Deoxyribonucleotides Biosynthesis	Pyrimidine Deoxyribonucleotides De Novo Biosynthesis	0.0168732	0.0774543	0.00297878	0.00540264	0.00613459	0.00294343	0.00295374	0.00268355	0.00444111	0.00495809	0.00270466	0.00399076	0.00511911	0.00451586	0.00259022	0.00224845	0.00410057	0.00149314	0.00351689	0.00272558	0.00399941	0.00371295	0.00256407	0.0044657	0.00434514	0.00319229	0.00321664	0.00385993	0.00320197	0.00317317	0.00332798	0.00381984	0.00485263	0.00488046	0.000175897	0.00418522	0.00359576	0.00285849	0.00123683	0.00028959	0.00254297	0.000930902	0.00257827	0.00253964	0.00466316
PWY-7392: taxadiene biosynthesis (engineered)	Biosynthesis	Secondary Metabolites Biosynthesis	Terpenoids Biosynthesis	Diterpenoids Biosynthesis	0.0182533	0.0808664	0.000622163	0.00146045	0.000104666	0.000389067	0.00143194	0.000919516	7.52e-05	0.000233923	0.000846946	2.37e-05	0.000124488	0.000269069	0.00014851	0.000652474	0.000133932	0.000447446	0.000157003	0.000929453	0.00015127	0.00103717	5.05e-05	1.94e-05	0.000386304	0.000754649	0.000993346	0.000341	0.000113556	0.000174874	0.00040841	3.61e-05	0.000130572	0.00143756	0	5.47e-05	0.000220269	7.91e-05	0.000643411	0	0	0.000733601	0.000151505	4.12e-05	0.000408366
PWY-7003: glycerol degradation to butanol	Biosynthesis	Secondary Metabolites Biosynthesis	Alcohols Biosynthesis		3.70344e-05	0.00352753	0.000743139	0.000433626	0.000286351	0.000673874	0.000760787	0.000545266	0.000157037	0.000335987	0.00100768	0.00115677	0.000554311	0.000651571	0.000173262	0.000978712	0.000572254	0.000791065	0.000176789	0.00177294	0.000135373	0.000602429	0.000495952	0.000339806	0.000327871	0.000548836	0.000977703	0.000207365	0.000416999	0.000378364	0.000490622	0.000336403	0.000684448	0.000326934	0	0	0.000364664	0.000419403	0.000410827	0	2.44e-05	0	0	0.00188852	0.000314354
PWY-6703: preQ0 biosynthesis	Biosynthesis	Secondary Metabolites Biosynthesis			0.00067511	0.00989295	0.00636166	0.00657405	0.00931714	0.00635242	0.00504954	0.00832571	0.0108777	0.00854351	0.00675733	0.00876244	0.0112278	0.00692492	0.00732741	0.00766005	0.00884812	0.00847463	0.0109325	0.00432169	0.00729962	0.00651329	0.00882961	0.00951583	0.00568412	0.00517849	0.008584	0.00785801	0.00628385	0.0099709	0.00534494	0.0145131	0.00851187	0.00772802	0.0161668	0.0050748	0.0104656	0.00908276	0.00802451	0.015477	0.0116924	0.00546861	0.00981964	0.0100253	0.00973703
AEROBACTINSYN-PWY: aerobactin biosynthesis	Biosynthesis	Siderophore Biosynthesis			0.01496	0.0721491	5.51e-05	8.74e-05	0	0	0.000381543	0	0	4.91e-05	0	0	6.78e-06	0.000228894	2.14e-05	1.46e-05	2.08e-05	3.61e-06	3.6e-06	1.92e-06	1.92e-05	0	0	0	7.82e-06	9.73e-06	0	0	1.15e-05	6.68e-06	1.43e-05	0	2.15e-05	8.87e-06	0	0	3.09e-06	0	0.000148463	0.000134463	0	0.000534507	5.5e-06	4.64e-05	0.000179799
GLYCOGENSYNTH-PWY: glycogen biosynthesis I (from ADP-D-Glucose)	Degradation/Utilization/Assimilation	Alcohols Degradation	Glycerol Degradation		2.07574e-09	7.90859e-07	0.00123352	0.00377494	0.00482752	0.00788875	0.0052718	0.00235456	0.00255033	0.00428127	0.00201536	0.00345617	0.00190448	0.0032376	0.00367901	0.00276663	0.00873461	0.00261264	0.00296312	0.00523631	0.00517837	0.00515329	0.00536661	0.00305502	0.0039527	0.0069537	0.00329491	0.00402742	0.00735231	0.00571797	0.00692339	0.00328184	0.00480837	0.00159729	0.000823004	0.00186946	0.00246148	0.00201373	0.000832522	0.00126895	0.00143025	0.000620602	0.0012392	0.00250851	0.000446558
PWY0-41: allantoin degradation IV (anaerobic)	Degradation/Utilization/Assimilation	Amines and Polyamines Degradation	Allantoin Degradation		0.0136002	0.0681802	4.6e-05	7.15e-05	1.03e-05	6.33e-05	0.000128254	0	0	4.56e-05	6.99e-05	0	6.94e-06	3.61e-05	2.15e-05	2.07e-05	2.95e-05	4.92e-05	8.56e-06	8.19e-05	0	0.000140981	0	9.35e-06	1.2e-05	2.39e-05	3.91e-05	8.14e-05	2.38e-05	5.95e-06	5.46e-05	0	0	1.29e-05	0	0	2.28e-05	1.85e-05	2.61e-05	0	0	0	1.55e-05	7.94e-05	0
URDEGR-PWY: superpathway of allantoin degradation in plants	Degradation/Utilization/Assimilation	Amines and Polyamines Degradation	Allantoin Degradation		0.0103192	0.0569798	3.39e-05	6.8e-05	8.03e-06	5.37e-05	0.000123887	0	8.55e-06	7.48e-05	4.85e-05	0	5.57e-06	2.71e-05	2.38e-05	1.39e-05	3.5e-05	3.51e-05	5.96e-06	5.69e-05	0	0.000112412	1.37e-05	8.67e-06	2.48e-05	1.87e-05	2.71e-05	6.91e-05	2.02e-05	1.92e-05	4.77e-05	0	0	2.86e-05	0	0	2.16e-05	2.15e-05	1.77e-05	0	5.42e-06	0	1.32e-05	5.73e-05	0
PWY-5692: allantoin degradation to glyoxylate II	Degradation/Utilization/Assimilation	Amines and Polyamines Degradation	Allantoin Degradation		0.0103192	0.0578177	3.39e-05	6.8e-05	8.03e-06	5.37e-05	0.000123887	0	8.55e-06	7.48e-05	4.85e-05	0	5.57e-06	2.71e-05	2.38e-05	1.39e-05	3.5e-05	3.51e-05	5.96e-06	5.69e-05	0	0.000112412	1.37e-05	8.67e-06	2.48e-05	1.87e-05	2.71e-05	6.91e-05	2.02e-05	1.92e-05	4.77e-05	0	0	2.86e-05	0	0	2.16e-05	2.15e-05	1.77e-05	0	5.42e-06	0	1.32e-05	5.73e-05	0
PWY-5030: L-histidine degradation III	Degradation/Utilization/Assimilation	Amino Acids Degradation	Proteinogenic Amino Acids Degradation	L-histidine Degradation	0.00418644	0.0306737	0.000788505	0.0012766	0.000786642	0.00135538	0.000466586	0.000219098	0.000830837	0.00109037	0.000367834	0.000536555	0.000935206	0.000651571	0.00135896	0.000262867	0.00101058	0.000343619	0.00098416	0.00051308	0.000227029	0.00119244	6.51e-05	0.000330097	0.000128227	0.00233509	0.000985525	0.00215966	0.000452338	0.00189818	0.00169729	0.00231778	0.000540539	0.00143076	1.09e-05	0.000488319	0.000794026	0.000550281	6.74e-05	5.33e-05	0.000114082	1.57e-05	0	8.25e-05	0.00121628
PWY-6318: L-phenylalanine degradation IV (mammalian, via side chain)	Degradation/Utilization/Assimilation	Amino Acids Degradation	Proteinogenic Amino Acids Degradation	L-phenylalanine Degradation	0.00329679	0.0261682	0	0	0	0.000135792	0	0	0	0	0.000212045	1.27e-05	0	0	1.49e-05	0	6.79e-06	0	0	0	7.82e-05	0	0	0	0	9.66e-05	0	0	0	0	9.81e-05	0	0	0	0	0	0	0	0	0	0	0	0	0	0
PWY-5417: catechol degradation III (ortho-cleavage pathway)	Degradation/Utilization/Assimilation	Aromatic Compounds Degradation	Catechol Degradation		0.00465026	0.0328102	0	0	0	0.000243103	0	7.63e-06	0	0	0	0	0	0.000162386	5.95e-05	4.08e-05	1.64e-05	2.4e-05	0	0.000260569	3.85e-05	0	0	0	0	6.73e-05	0	0	0	0	0.00011881	0	0	0	0	0	0	2.67e-05	0	0	0	0	0	0	0
PWY-5431: aromatic compounds degradation via &beta;-ketoadipate	Degradation/Utilization/Assimilation	Aromatic Compounds Degradation	Catechol Degradation		0.00465026	0.0322136	0	0	0	0.000243103	0	7.63e-06	0	0	0	0	0	0.000162386	5.95e-05	4.08e-05	1.64e-05	2.4e-05	0	0.000260569	3.85e-05	0	0	0	0	6.73e-05	0	0	0	0	0.00011881	0	0	0	0	0	0	2.67e-05	0	0	0	0	0	0	0
3-HYDROXYPHENYLACETATE-DEGRADATION-PWY: 4-hydroxyphenylacetate degradation	Degradation/Utilization/Assimilation	Aromatic Compounds Degradation			0.0256473	0.0939579	0.000141283	0.000125925	0	0.000142658	0.000455093	0.00130368	0	1.8e-05	0	0	0	0.000172852	0.000105195	0.0012275	6.21e-05	8.36e-05	3.98e-05	0.00097512	9.54e-05	0.000366426	9.2e-06	0	4.51e-05	0.00013975	0	0.000137629	5.89e-06	0	0.00015859	0	1.49e-05	0	0	0	2.27e-05	1.51e-05	0.00015694	0.000124567	0	0	0	2.42e-05	1.12e-05
PWY-6185: 4-methylcatechol degradation (ortho cleavage)	Degradation/Utilization/Assimilation	Aromatic Compounds Degradation			0.0183408	0.0794072	0	0	0	0.000215131	0	6.39e-06	0	0	4.42e-05	0	0	0.000138079	5.14e-05	3.45e-05	1.38e-05	2e-05	0	0.000233169	3.23e-05	0	0	0	0	5.67e-05	0	0	0	0	0.000101042	0	0	0	0	0	0	2.25e-05	0	0	0	0	0	0	0
PWY0-321: phenylacetate degradation I (aerobic)	Degradation/Utilization/Assimilation	Aromatic Compounds Degradation	Phenolic Compounds Degradation	Phenylacetate Degradation	0.0278396	0.0991297	0.000109311	0.000109274	2.52e-05	0.000141641	7.7e-05	0.00126898	1.55e-05	2.99e-05	0.00056257	0	3.9e-05	0.000104657	2.57e-05	0.000840237	2.12e-05	1.46e-05	3.55e-05	0.00067157	3.35e-05	0.000309599	0	0	1.72e-05	2.1e-05	0	5.47e-05	9.85e-06	1.48e-05	4.19e-05	0	3.62e-05	3.87e-05	0	0	2.41e-05	0	7.96e-06	0	4.61e-06	0	0	0.0002646	9.72e-05
P185-PWY: formaldehyde assimilation III (dihydroxyacetone cycle)	Degradation/Utilization/Assimilation	C1 Compounds Utilization and Assimilation	Formaldehyde Assimilation		0.00275132	0.0232945	0.00260933	0.0013772	0.000566119	0.000419582	0.000388438	0.000270154	0.000359116	0.00152145	0.00201845	0.000957722	0.000399476	0.00173865	7.5e-05	0.000856666	0.0011993	0.00140167	0.000390581	0.0013512	0.00052162	0.000723536	0.000546937	0.000339806	0.000438244	0.000975708	0.00186415	0.000341	0.000586626	0.00060729	0.00100776	0.000250296	0.00222884	0.000435006	0	0.000499251	0.00187919	0.000356939	0.00390992	0	0.000376528	0.00251238	1.78e-05	0.00148902	0.00129854
PWY-1861: formaldehyde assimilation II (RuMP Cycle)	Degradation/Utilization/Assimilation	C1 Compounds Utilization and Assimilation	Formaldehyde Assimilation		0.0247065	0.0931998	0	0	2.22e-05	4.04e-05	1.26e-05	0	0	0.000472284	0	0	0.000137804	7.66e-05	0	0	6.12e-05	0	0	0	0	0	0	0	3.86e-05	7.88e-05	0	6.42e-05	0	3.5e-05	2.26e-05	0	1.61e-05	6.97e-05	0	0	0	0	4.85e-05	0	1.76e-05	0	0	3.4e-05	0
PWY66-422: D-galactose degradation V (Leloir pathway)	Degradation/Utilization/Assimilation	Carbohydrates Degradation	Sugars Degradation	Galactose Degradation	0.028117	0.0991904	0.00807235	0.00665758	0.00810522	0.00609185	0.0057071	0.00356004	0.00684728	0.00719808	0.00450371	0.00671404	0.00599037	0.00600165	0.00304258	0.00368625	0.00849761	0.00689567	0.00501598	0.00492411	0.00301576	0.0060237	0.00849271	0.00420353	0.00489859	0.00651773	0.00746295	0.0064997	0.00904875	0.00742849	0.00652469	0.00504431	0.00764076	0.00621464	0.0108065	0.0038387	0.00662267	0.00434032	0.00614781	0.00122821	0.00665188	0.00913599	0.00833551	0.0031641	0.0036312
FUCCAT-PWY: fucose degradation	Degradation/Utilization/Assimilation	Carbohydrates Degradation	Polysaccharides Degradation	Glycogen Degradation	0.00961028	0.0554775	0.000457981	0.000953978	0.000358762	0.00150032	0.00109176	0.00209184	8.98e-05	0.000178453	0.000958223	8.74e-05	0.000114578	0.00076298	0.00165646	0.00155139	0.000426147	0.000664989	0.000226126	0.00160371	0.000529071	0.000683167	0.000776373	0.00013754	0.000203215	0.00123742	0.000724804	0.000466954	0.000124393	0.00156433	0.00116423	0.000398128	0.00022499	0.000195073	0	0	0.00016851	0.000264432	0.00092599	0.000125731	2.66e-05	0.000747951	0.00011573	0.000513635	0.000308478
PWY-6731: starch degradation III	Degradation/Utilization/Assimilation	Carbohydrates Degradation	Polysaccharides Degradation	Starch Degradation	0.0046145	0.0331721	7.56e-06	0	7.93e-05	0	0.000217434	0	0	9.16e-05	0.000218846	0	0	0.000116473	5.55e-05	5e-05	0.000129366	0	7.53e-06	0	9.96e-05	0	0	0	7.56e-05	7.55e-05	0.000145482	0.000119811	2.32e-05	1.31e-05	4.69e-05	0	0	0	0	0	0	0	0	0	0	0	0.000148057	0	0
PWY0-42: 2-methylcitrate cycle I	Degradation/Utilization/Assimilation	Carboxylates Degradation	Propanoate Degradation	2-Methylcitrate Cycle	0.0180767	0.0810261	0.000126809	2.03e-05	5.36e-06	0.000220471	8.6e-05	0.000115249	0	0	0.000192263	0	0	9.72e-05	2.45e-05	0.000291032	0.000123583	0.000183676	7.5e-05	0.000561433	0.000112521	0.00040369	7.28e-06	0	3.96e-05	8.11e-05	0	4.45e-05	0	0	7.4e-05	0	2.8e-05	1.33e-05	0	0	4.15e-05	1.2e-05	0	5.38e-05	0	1.18e-05	0	3.63e-05	0
PWY-4984: urea cycle	Degradation/Utilization/Assimilation	Inorganic Nutrients Metabolism	Nitrogen Compounds Metabolism		0.00035605	0.00713973	0.00174335	0.000457909	0.000375219	2.77e-05	0.000221801	0.00030981	0.000952571	0.00105551	0.000233683	0.00016789	0.000910433	0.000202561	0.0001735	0.000112892	0.000496157	9.42e-05	0.000639833	0.000107183	0	0.000649009	0.000294327	0.000511327	0.000299629	0.000172273	0.000208316	0.000108137	0.000819863	0.000677239	0.000138965	0.00140116	0.00124956	0.000547156	0	0.00107503	0.00126456	0.000505664	0.00184546	0.00297122	0.00141339	1.66e-05	0	0.000996141	0.00598935
PWY490-3: nitrate reduction VI (assimilatory)	Degradation/Utilization/Assimilation	Inorganic Nutrients Metabolism	Nitrogen Compounds Metabolism	Nitrate Reduction	0.00289225	0.0239554	1.31e-05	6.59e-05	5.63e-05	6.56e-05	6.37e-05	7.44e-05	0.000114735	6.97e-05	2.06e-05	1.33e-05	0.000161339	5.6e-05	8.64e-05	1.28e-05	0.000153717	9.74e-05	7.17e-05	4.84e-05	4.99e-05	7.27e-05	6.51e-05	8.03e-05	5.78e-05	6.28e-05	6.75e-05	0.000115817	0.000143712	3.59e-05	5.86e-05	2.49e-05	0.000146367	4.15e-05	0	5.25e-05	3.76e-05	4.1e-05	0	0	2.81e-05	0	6.4e-05	0.000446188	0
PWY-5675: nitrate reduction V (assimilatory)	Degradation/Utilization/Assimilation	Inorganic Nutrients Metabolism	Nitrogen Compounds Metabolism	Nitrate Reduction	0.00659031	0.0425578	2.61e-05	0	0	0.000656074	4.16e-05	8.72e-05	0	1.54e-05	0	0	0	0	0.00104719	7.02e-05	2.86e-05	0	4.16e-05	5.24e-05	0	0.000272335	0	0	0	0.000655554	5.53e-06	0	1.68e-06	0	0.000570182	0	3.83e-05	0	0	0	0	0	1.87e-05	0	1.13e-05	3.17e-05	0	7.29e-06	0
PWY0-1298: superpathway of pyrimidine deoxyribonucleosides degradation	Degradation/Utilization/Assimilation	Nucleosides and Nucleotides Degradation	Pyrimidine Nucleotides Degradation		0.00932784	0.0546755	0.000535751	0.000440564	0.00066157	0.000750162	0.00186404	0.00191587	0.000699972	0.000364514	0.00089022	4.07e-05	0.000671986	0.000340978	0.000930568	0.00164762	0.000660528	0.000608132	0.00112549	0.00177294	0.000899173	0.000968856	9.53e-05	0.000385113	0.000357087	0.00191076	0.000735233	0.000503819	0.00322812	0.000950679	0.00194127	0.00126228	0.000888028	0.000479187	0.00179393	6.78e-05	0.000341137	0.000553256	0.000808611	0.00112052	0.000202314	0.000658268	0.000123058	0.00167839	0.00051413
P164-PWY: purine nucleobases degradation I (anaerobic)	Degradation/Utilization/Assimilation	Nucleosides and Nucleotides Degradation	Purine Nucleotides Degradation		0.00294661	0.0238863	0.000758261	0.00118987	0.000493709	0.0010248	0.0020732	0.000247352	0.000468677	0.000767064	0.00101386	0.000663482	0	0.000982421	0.00148748	0.000403689	0.000560079	0	0.0012257	0.00090259	0.000283165	0.000322952	0.000588653	0.000449838	0.000297356	0.00198445	0.000664838	0.000666639	0	0.000492827	0	0.000472198	0.000824848	0.00124385	2.07e-05	0.000193505	0.000755795	0	0.000413	0	0.000175339	0	0.000374992	0.000218684	0.000587577
PWY-5695: urate biosynthesis/inosine 5'-phosphate degradation	Degradation/Utilization/Assimilation	Nucleosides and Nucleotides Degradation	Purine Nucleotides Degradation		0.00247507	0.0219303	0.0115198	0.010357	0.0102414	0.00845397	0.00988304	0.0112731	0.00969392	0.0123367	0.0109032	0.0115001	0.0129955	0.0110335	0.0118997	0.011382	0.00949811	0.00941118	0.0153009	0.00789535	0.00694711	0.00930511	0.0139183	0.0135714	0.00978871	0.0099166	0.0110026	0.0141324	0.0126616	0.0134249	0.0102399	0.0172265	0.0110379	0.012029	0.0109634	0.0128835	0.0118587	0.00925885	0.0105532	0.0166331	0.0148666	0.00963323	0.0145188	0.0142686	0.0136326
PWY-6608: guanosine nucleotides degradation III	Degradation/Utilization/Assimilation	Nucleosides and Nucleotides Degradation	Purine Nucleotides Degradation	Guanosine Nucleotides Degradation	7.51594e-05	0.00318175	0.00149492	0.00173797	0.00219536	0.00218946	0.00404281	0.00408243	0.00214252	0.00197155	0.00232755	0.000943299	0.00190138	0.00244424	0.00300869	0.0039539	0.00143977	0.00371067	0.0020634	0.0027269	0.000529071	0.00255256	0.00295821	0.00138511	0.000999845	0.00279655	0.00203362	0.00160362	0.00518696	0.00143079	0.00264671	0.00292886	0.00229553	0.00191675	2.16e-05	0.000382638	0.00161746	0.00122846	0.00290837	0.000305597	0.000474875	0.00449515	0.000525851	0.00113363	0.00143075
SALVADEHYPOX-PWY: adenosine nucleotides degradation II	Degradation/Utilization/Assimilation	Nucleosides and Nucleotides Degradation	Purine Nucleotides Degradation	Adenosine Nucleotides Degradation	0.000201736	0.0059124	0.000913802	0.00149167	0.00189584	0.00119263	0.00360135	0.00360716	0.00185645	0.00070684	0.00202154	0.000300009	0.00162577	0.00132678	0.00155888	0.00348224	0.00123278	0.00110996	0.00175761	0.00242571	0.000558878	0.00222961	0.00255007	0.00117476	0.000847271	0.00244689	0.00134011	0.001364	0.00464314	0.00121458	0.0023046	0.00251222	0.00197963	0.00164147	1.84e-05	0.000327246	0.000920482	0.00105	0.00131291	0.000213045	0.000399008	0.00100085	0.000441801	0.000957229	0.00142781
PWY-7209: superpathway of pyrimidine ribonucleosides degradation	Degradation/Utilization/Assimilation	Nucleosides and Nucleotides Degradation	Pyrimidine Nucleotides Degradation	Pyrimidine Nucleobases Degradation	0.00480421	0.0326858	3.33e-05	0.00110661	0.000116515	6.08e-05	0.000278113	0.000101866	0	9.6e-05	4.82e-05	0	0	0.00013369	0.000283216	4.72e-05	0.000235294	0	8.15e-05	4.67e-05	0.000109043	7.11e-05	0.00038471	9.48e-05	4.97e-05	0.000332859	7.12e-05	5.9e-05	0.00040522	0.000130997	0.000358021	0.000487629	0.000424709	0	0	0	2.37e-05	0	0	0	0	0	0.000407319	0.000817147	0
PWY-6595: superpathway of guanosine nucleotides degradation (plants)	Degradation/Utilization/Assimilation	Nucleosides and Nucleotides Degradation	Purine Nucleotides Degradation	Guanosine Nucleotides Degradation	0.0210154	0.0851794	0.000213436	0.000332678	0.000167861	0.000211825	6.02e-05	6.89e-05	0.000293988	0.000459605	5.1e-05	5.45e-05	0.000535731	0.000371362	0.000118047	4.83e-05	0.000294955	0	0	0.000181861	3.78e-05	7.11e-05	5.72e-05	0.000102589	0.000242819	0.000510722	5.53e-05	0.000657423	0.000179051	0.000378364	0.000173441	6.05e-05	4.28e-05	0.000276977	0	8.89e-05	0.000308788	0.000168951	0	0	0	0	5.43e-05	5.01e-05	0.000802042
PWY-6606: guanosine nucleotides degradation II	Degradation/Utilization/Assimilation	Nucleosides and Nucleotides Degradation	Purine Nucleotides Degradation	Guanosine Nucleotides Degradation	0.000847606	0.0115335	0.000820909	0.000503006	0.000411424	0.000953596	0.000155145	8.25e-05	0.00102257	0.00070684	0.000673847	0.000277509	0.000829918	0.00124237	0.00131612	0.000443589	0.000435279	0.00117424	0.000513922	0.000642021	0.000162944	9.25e-05	0.00142065	0.000232039	0.000525892	0.00153471	0.00118628	0.00072808	0.000213212	0.000689958	0.00149308	0.000598735	0.000130221	0.000322856	1.13e-05	0.000102037	0.000841079	0.000197209	0.00128682	0.000169097	0.000137686	0.00109592	0.000120903	7.94e-05	0.000863738
PWY-6353: purine nucleotides degradation II (aerobic)	Degradation/Utilization/Assimilation	Nucleosides and Nucleotides Degradation	Purine Nucleotides Degradation		0.00780865	0.0495849	0.00153812	0.00115171	0.000994	0.00198094	0.00277639	0.00436649	0.00207861	0.00130908	0.00216373	0.000576941	0.00176203	0.00222817	0.00261521	0.00369988	0.0011993	0.00202216	0.00129765	0.00286863	0.000829624	0.00209608	0.0028908	0.000576052	0.00109074	0.00297957	0.00217441	0.000992278	0.00188474	0.0014594	0.00280445	0.00240728	0.000793258	0.000720479	3.01e-05	0.000528405	0.00157335	0.00076147	0.00225922	0.000363806	0.000545123	0.00188744	0.000590505	0.00124518	0.00212703
PWY-7237: myo-, chiro- and scillo-inositol degradation	Degradation/Utilization/Assimilation	Secondary Metabolites Degradation	Sugar Derivatives Degradation	Sugar Alcohols Degradation	0.011822	0.0625582	0.00361734	0.000943571	0.000288326	0.00201145	0.000139516	0.000163084	0.0035233	0.00559681	0.00226882	0.00274335	9.1e-05	0.00423467	0.00112335	0.000668904	0.000837074	0.00952309	8.15e-05	0.00083812	0.000688041	0.000225445	0.00165704	5.95e-05	0.000512907	0.00269074	0.00314945	0.000300141	0.000212034	0.000890268	0.00260693	0.000107711	0.000199016	0.000509773	0	0.00217921	0.0040218	0.000594899	0.00958628	0.000980821	4.33e-05	0.0120182	3.12e-05	0.00139045	0.000141312
ANAGLYCOLYSIS-PWY: glycolysis III (from glucose)	Generation of Precursor Metabolites and Energy	Glycolysis			0.0241246	0.0928432	0.0111472	0.0109686	0.00859715	0.00661556	0.00763796	0.00684601	0.00944202	0.010211	0.00666673	0.00661062	0.0106257	0.00881607	0.00759818	0.005588	0.0100268	0.00600144	0.011748	0.00483718	0.00519014	0.0077338	0.00932167	0.00922113	0.00421357	0.00883687	0.0075723	0.0093727	0.0102101	0.0113013	0.00872567	0.0104885	0.0107545	0.00952229	0.0154733	0.00539687	0.00893064	0.00888621	0.00629602	0.0177621	0.0137084	0.0116482	0.0129991	0.0101686	0.00943002
CENTFERM-PWY: pyruvate fermentation to butanoate	Generation of Precursor Metabolites and Energy	Fermentation	Fermentation to Short-Chain Fatty Acids	Fermentation to Butanoate	0.000976116	0.0123967	0.000133074	0.000360777	0.00110262	0.000101208	0.000131012	0.000187869	0.00153385	0.000542017	0.000296431	0	0.00105598	0.000425378	0	0.000455324	0.00101666	0.000127312	0.00114348	0.000343844	0.000268262	0.000434743	0	0.000608414	0.000366826	0.000108751	0.000222656	0.000414729	4.66e-05	0.00053734	0.000174767	0	0.000140751	0.000713682	0	0.000105681	0.000635221	1.61e-05	0	0	0.000102843	0	0	8.61e-05	0
P124-PWY: Bifidobacterium shunt	Generation of Precursor Metabolites and Energy	Fermentation	Fermentation to Short-Chain Fatty Acids	Fermentation to Lactate	0.00607351	0.0405966	0.000285158	0.000430157	0.000595742	0.000378895	0.000335574	0.000196791	0.000374333	0.000263718	0	0	0.000322058	0	0	0	0.000532684	2.38e-05	0	0.000199053	0	0.000779432	0.000192355	0	0	0.00056154	0.000430189	0.000918548	0.000600762	0.000413339	0.000639134	0	0.001404	0.000730675	0	0	0.000482297	0	0	0	0	0	0	0	0.000484751
P461-PWY: hexitol fermentation to lactate, formate, ethanol and acetate	Generation of Precursor Metabolites and Energy	Fermentation	Fermentation to Short-Chain Fatty Acids	Fermentation to Acetate	0.0223169	0.0876572	0.00249749	0.000672988	0.000691192	0.00279757	0.00152847	0.00246609	0.00246512	0.00352187	0.00250374	0.0017539	0.000656502	0.00293714	0.00239258	0.00265496	0.000955787	0.00643455	0.000441973	0.00225916	0.00172631	0.00109307	0.000915425	6.18e-05	0.000607049	0.00334371	0.00421281	0.000365576	0.000374593	0.000588213	0.00311685	0.000308626	0.000414179	0.0004486	0	1.61e-05	0.00222621	0.000136232	0.006038	0.0016444	0.000268347	0.00719279	6.01e-05	0.00240215	0.000969502
PWY-5676: acetyl-CoA fermentation to butanoate II	Generation of Precursor Metabolites and Energy	Fermentation	Fermentation to Short-Chain Fatty Acids	Fermentation to Butanoate	0.0113466	0.0617579	0.00140419	0.00110661	0.00113224	0.00173682	0.00195368	0.000755937	0.000995178	0.00131542	0.00157643	0.00190391	0.00204383	0.00170827	0.00148986	0.0025466	0.00305112	0.0007614	0.00186554	0.00210067	0.003622	0.000968856	0.0023208	0.000919094	0.000704436	0.0012425	0.000568371	0.00179716	0.000313339	0.000925243	0.00119075	0.000382697	0.000368549	0.00107052	0.00538812	0.000477386	0.00122633	5.21e-05	0.000971638	0	0.000429917	0.000134882	0.000131463	0.00257596	0.000234737
FERMENTATION-PWY: mixed acid fermentation	Generation of Precursor Metabolites and Energy	Fermentation	Fermentation to Short-Chain Fatty Acids		0.0205837	0.08618	0.00110175	0.000461378	0.000404841	0.00232169	0.00156525	0.00171263	8.67e-05	0.000240262	0.0015177	3.78e-05	0.000179299	0.00123225	0.000887729	0.0025159	0.000907084	0.000949279	0.000619276	0.00265942	0.00114011	0.00196566	0.000984951	8.58e-05	0.000639511	0.000922349	0.00105331	0.000789521	0.000438203	9.76e-05	0.000941463	0.000324058	0.000213758	0.00024775	0	0	0.000591108	0.000333143	0.00102815	0.000500597	0.000114363	0.000674411	0.000115084	0.000298323	0.000317292
PWY-6590: superpathway of Clostridium acetobutylicum acidogenic fermentation	Generation of Precursor Metabolites and Energy	Fermentation	Fermentation of Pyruvate		0.000976116	0.0119968	0.000169151	0.00045444	0.00131985	0.000128926	0.000167327	0.000230747	0.00176515	0.000675144	0.000367834	0	0.00126655	0.000523283	0	0.000556246	0.00119626	0.000159202	0.00138502	0.000424432	0.000337811	0.000543429	0	0.0007411	0.000457721	0.000138988	0.000273757	0.000522252	5.98e-05	0.000667701	0.000222238	0	0.000179712	0.000863216	0	0.00013447	0.000776381	2.06e-05	0	0	0.000131504	0	0	0.000109991	0
PWY-6588: pyruvate fermentation to acetone	Generation of Precursor Metabolites and Energy	Fermentation	Fermentation of Pyruvate		0.000298668	0.00758616	0.000280837	0.000176919	0.000123098	0.00037381	0.000537838	0.000364337	6.18e-05	0.000122033	0.000429655	0.00141928	0.000337541	0.000255565	0.000143988	0.000467059	0.000238034	0.000338675	7.17e-05	0.00109063	4.87e-05	0.000255567	0.000252611	0.00021068	0.000160689	0.000218772	0.000411939	9.06e-05	0.000181171	0.000171059	0.000192006	0.000165115	0.000292733	0.000176721	0	0	0.000132338	0.000252534	0.000144333	0	8.32e-06	0	0	0.00136451	0.000129854
COA-PWY-1: coenzyme A biosynthesis II (mammalian)	Generation of Precursor Metabolites and Energy	Fermentation	Fermentation of Pyruvate	pyruvate fermentation to ethanol	0.000243675	0.00663144	0.0110357	0.0129935	0.014262	0.00944365	0.00858552	0.00983744	0.0145262	0.0123624	0.0092088	0.0136809	0.0157236	0.009098	0.00835786	0.00800248	0.0126888	0.0096549	0.0126924	0.00873356	0.0150978	0.0106583	0.012879	0.0142044	0.0111235	0.00887709	0.0111062	0.0123469	0.0132731	0.0130514	0.00901384	0.0155513	0.0141157	0.0141218	0.0217842	0.013125	0.0146217	0.0136883	0.0107224	0.0121782	0.0159525	0.00977927	0.0147	0.0144197	0.0148442
PWY-5100: pyruvate fermentation to acetate and lactate II	Generation of Precursor Metabolites and Energy	Fermentation	Pyruvate Fermentation		0.00100236	0.0119344	0.00320291	0.00477776	0.00414008	0.00325303	0.00449648	0.000974043	0.00345887	0.00413032	0.00211427	0.0032562	0.00346652	0.00263667	0.00322203	0.00212172	0.00889856	0.00123357	0.00381147	0.00295878	0.00285311	0.00428697	0.0048092	0.00247897	0.00308718	0.00495675	0.00141832	0.0049526	0.00646201	0.00404306	0.00486055	0.0033918	0.00544564	0.00452298	0.00613213	0.00249261	0.00323527	0.00229631	0.00110206	0.00134463	0.00352029	0.00123223	0.00526334	0.00282689	0.00292026
PWY4LZ-257: superpathway of fermentation (Chlamydomonas reinhardtii)	Generation of Precursor Metabolites and Energy	Fermentation	Pyruvate Fermentation		0.001869	0.0192457	0.000682651	0.000707678	0.000549662	0.00105277	0.00111245	0.000812942	0.00035303	0.000361344	0.000775852	2.41e-05	0.00109314	0.000833876	0.001616	0.000882483	0.000946655	0.000519137	0.000863389	0.00220544	0.000459522	0.00138186	0.000155738	0.000261165	0.000428505	0.00188535	0.000683089	0.000740368	0.000233237	0.000300465	0.00181398	0.000124376	0.00020393	0.000601532	0	5.58e-05	0.0005617	0.000290608	0.0002891	0	0.000182082	0	0	0.0007938	0.000719782
P122-PWY: heterolactic fermentation	Generation of Precursor Metabolites and Energy	Fermentation			0.0161376	0.0759063	0.000343486	0.000314639	0.00020637	0.00212843	0.00157674	7.44e-05	0	0	0.000321468	4.82e-05	4.06e-05	0.000992549	0.00256518	0.001028	0.00040484	0.000484528	0.00045739	0.000983179	0.00146302	0.000729747	0.000208114	0	0.000331117	0.0022487	4.61e-05	0.000172343	0.000125807	3.47e-05	0.00211365	0.000114192	0.000186029	0.000107052	0	0	0.000438185	0.000131175	9.41e-06	0.00039291	1.68e-05	5.65e-06	0	5.34e-06	0
PWY-5690: TCA cycle II (plants and fungi)	Generation of Precursor Metabolites and Energy	TCA cycle			0.002122	0.0202121	0.00301777	0.00156105	0.00114869	0.002598	0.00211458	0.00234712	0.00239512	0.00401882	0.00155788	0.00162409	0.000610052	0.00264342	0.000692571	0.00245499	0.00174416	0.0050914	0.000570453	0.00309062	0.000926496	0.00283204	0.00121902	0.000831715	0.00100634	0.00234272	0.00393999	0.00165892	0.000376949	0.0010556	0.00226482	0.000370351	0.000438749	0.00167885	1e-05	0.00105317	0.0019586	0.00120467	0.00577103	0.000416194	0.000351239	0.00660907	0.000459042	0.000237102	0.000238556
PWY66-398: TCA cycle III (animals)	Generation of Precursor Metabolites and Energy	TCA cycle			0.0151275	0.0720448	8.1e-05	0	0.000246196	0.000684046	4.57e-05	0	0	2.49e-05	0	0	0	0	0.000217529	0.000102565	0.000139715	0	0.000321201	7.82e-05	0.000265778	0.000534113	0	0.000111974	6.23e-05	0.000950299	0	0.000365576	0	0	0.000912291	0	0.000255176	0	0	0	0.000184096	7.79e-05	4.02e-05	6.87e-05	2.37e-05	5.36e-05	0	0	0
PWY-6969: TCA cycle V (2-oxoglutarate:ferredoxin oxidoreductase)	Generation of Precursor Metabolites and Energy	TCA cycle			0.0241246	0.0919148	0.00370293	0.00203978	0.00154037	0.00314178	0.00230728	0.00281801	0.00159168	0.00237727	0.00200609	0.000677906	0.000823725	0.00237334	0.00138514	0.00286878	0.00235598	0.00242017	0.000763174	0.0033578	0.00113514	0.00305252	0.00155506	0.00126214	0.00132122	0.00235542	0.00233084	0.00218731	0.000466474	0.00136084	0.00227012	0.000102464	0.000561598	0.00219882	0	0.00142851	0.00217328	0.00136827	0.00237425	0.000646119	0.000505784	0.00196072	0.00058835	0.00125555	0.00076385
TCA: TCA cycle I (prokaryotic)	Generation of Precursor Metabolites and Energy	TCA cycle			0.018297	0.0801284	0.00381846	0.00225139	0.00165228	0.00335495	0.00271134	0.00322733	0.00179254	0.00267839	0.0022781	0.00078464	0.00095069	0.00262317	0.00148748	0.00300514	0.00236207	0.00276853	0.000863389	0.00373068	0.00184802	0.00346971	0.00163386	0.00141424	0.00152898	0.00210641	0.00257331	0.00219346	0.000553643	0.00146258	0.00197575	0.000122525	0.000666898	0.00231777	7.77e-06	0.00137021	0.00222915	0.00167464	0.00270526	0.000771269	0.000598512	0.00223998	0.000706882	0.0010117	0.000705092
PWY66-367: ketogenesis	Generation of Precursor Metabolites and Energy	Other			0.00645268	0.0423875	0	4.89e-06	0	0	0	0	0	7.01e-06	0	0	0	0	1.24e-05	0	0	0	0	1.08e-05	2.07e-05	0	0	0	6.2e-05	8.08e-06	0	0	0	0	0	0	0	0	0	0	0	0	0	0	0	0	0	0	0
PWY-5464: superpathway of cytosolic glycolysis (plants), pyruvate dehydrogenase and TCA cycle	Generation of Precursor Metabolites and Energy				0.00153477	0.016243	0.00082739	0.000146739	0.000100058	0.00220471	0.000347066	0.000812942	6.12e-05	0.000105234	0.00115296	0.000254431	0.000226679	0.0017319	0.000592613	0.00148332	0.000316566	0.00107536	0.000506213	0.00153655	0.000511684	0.00095954	0.0001124	2.29e-05	0.000607049	0.00149405	0.000685696	0.000387081	0.000164679	4.17e-05	0.00153286	7.62e-05	0.0002636	0.00013458	0	0	0.000746972	0.000262945	0.000997722	0.000102739	4.47e-05	0.000597284	0.000137066	0.000253186	0.000190669
PRPP-PWY: superpathway of histidine, purine, and pyrimidine biosynthesis	Superpathways				2.07885e-05	0.0039602	0.0037276	0.00344473	0.00367606	0.00385677	0.00341745	0.00252285	0.00357939	0.00487165	0.0031703	0.00245488	0.00270652	0.0045904	0.00325756	0.00278201	0.00441354	0.00206913	0.00350785	0.00328288	0.00331912	0.0028662	0.00293221	0.00193527	0.00315535	0.00389849	0.00275319	0.00278944	0.00422058	0.0030905	0.00401353	0.00195978	0.00306071	0.00237894	0	0.00222659	0.00333173	0.00111841	0.00146289	0.000331791	0.00144148	0.00117304	0.0013879	0.00273391	0.00230624
PWY0-781: aspartate superpathway	Superpathways				0.00191256	0.0191759	0.00191186	0.00196346	0.00217561	0.00345293	0.00349438	0.00299324	0.00106213	0.00162922	0.00245738	0.000611558	0.00153907	0.00216403	0.00391443	0.00314091	0.00283388	0.00153269	0.00151093	0.00307284	0.00406468	0.00289725	0.00275874	0.000621359	0.00128876	0.00382526	0.00175987	0.00210744	0.00255736	0.000712214	0.0037156	0.0020215	0.00210599	0.00218183	0	0.000138843	0.00130279	0.000502689	0.00137594	0.000899328	0.000907602	0.0016645	0.00231086	0.0020727	0.000614018
PWY0-845: superpathway of pyridoxal 5'-phosphate biosynthesis and salvage	Superpathways				0.00247507	0.0224524	0.00176832	0.00457666	0.00226747	0.00317349	0.00275136	0.00421592	0.00138168	0.00522476	0.000778943	0.00550555	0.00184331	0.00322293	0.00162884	0.00454881	0.000845451	0.00425645	0.000566805	0.000849495	0.00445734	0.00149017	0.00539181	0.000697944	0.00227919	0.00549568	0.00355555	0.00348466	0.00519538	0.00400081	0.00590457	0.00491718	0.00184318	0.00270679	0.00012759	0.00432096	0.00247031	0.00233797	0.00031496	0.00144804	0.00300625	0.0133254	0.0135661	0.0088993	0.00547565
[truncated: 48 more columns]

## Sheet: Table S7
Table S7 Relative abundance profile at the species level of 46 samples used in Random Forest Model for classification
Species	PRF01	PRF02	PRF03	PRF04	PRF05	PRF06	PRF07	PRF08	PRF09	PRF10	PRF11	PRF12	PRF13	PRF14	PRF15	PRF16	BGI002A	BGI003A	BGI-06A	BGI-15A	BGI-17A	BGI-28A	N003A	N006A	N013A	N024A	N037A	N038A	N043A	N046A	N052A	N082A	N084A	N087A	N089A	SZEY-26A	SZEY-38A	SZEY-43A	SZEY-58A	SZEY-63A	SZEY-68A	SZEY-69A	SZEY-73A	SZEY-75A	SZEY-81A	T2D-83A
k__Bacteria|p__Actinobacteria|c__Actinobacteria|o__Actinomycetales|f__Actinomycetaceae|g__Actinomyces|s__Actinomyces_graevenitzii	0.01081	0	0	0	0	0	0	0.01991	0.01107	0.01302	0	0	0	0	0.000930014	0.00146	0	0	0	0.00767189	0	0	0	0	0	0	0	0	0	0	0	0	0	0	0	0.00970093	0	0	0	0	0	0	0	0	0	0
k__Bacteria|p__Actinobacteria|c__Actinobacteria|o__Actinomycetales|f__Actinomycetaceae|g__Actinomyces|s__Actinomyces_odontolyticus	0	0	0	0	0	0	0	0	0	0.0014	0	0	0	0	0	0	0	0	0	0.0065116	0	0	0	0	0	0	0	0	0	0	0	0	0	0	0	0.00875084	0	0	0	0	0	0.0202278	0	0	0	0.00465017
k__Bacteria|p__Actinobacteria|c__Actinobacteria|o__Actinomycetales|f__Actinomycetaceae|g__Actinomyces|s__Actinomyces_turicensis	0	0	0	0	0	0	0	0	0	0.00093	0	0	0	0	0	0	0	0	0	0	0	0	0	0	0	0	0	0	0	0	0	0	0	0	0	0	0	0	0	0	0	0	0	0	0	0
k__Bacteria|p__Actinobacteria|c__Actinobacteria|o__Actinomycetales|f__Actinomycetaceae|g__Actinomyces|s__Actinomyces_urogenitalis	0	0	0	0	0	0	0	0	0	0.00322	0	0	0	0	0	0	0	0	0	0	0	0	0	0	0	0	0	0	0	0	0	0	0	0	0	0	0	0	0	0	0	0	0	0	0	0
k__Bacteria|p__Actinobacteria|c__Actinobacteria|o__Actinomycetales|f__Dermabacteraceae|g__Brachybacterium|s__Brachybacterium_muris	0	0	0	0	0	0	0.05528	0	0	0	0	0	0	0	0	0	0	0	0	0	0	0	0	0	0	0	0	0	0	0	0	0	0	0	0	0	0	0	0	0	0	0	0	0	0	0
k__Bacteria|p__Actinobacteria|c__Actinobacteria|o__Actinomycetales|f__Micrococcaceae|g__Rothia|s__Rothia_aeria	0	0	0	0	0	0	0	0	0	0	0.00637043	0	0	0	0	0	0	0	0	0	0	0	0	0	0	0	0	0	0	0	0	0	0	0	0	0	0	0	0	0	0	0	0	0	0	0
k__Bacteria|p__Actinobacteria|c__Actinobacteria|o__Actinomycetales|f__Micrococcaceae|g__Rothia|s__Rothia_mucilaginosa	0.03143	0.00022	0.0012	0.0073	0.00398	0.02396	0	0.00289	0.01632	0	0.00276665	0	0	0	0.0197903	0.01301	0.00801273	0	0	0	0	0	0	0.0097102	0.02631	0	0.0235658	0	0	0	0	0	0.0110555	0	0.00327055	0.00149014	0	0	0.00414	0	0	0.00274377	0	0	0.015392	0.00166006
k__Bacteria|p__Actinobacteria|c__Actinobacteria|o__Actinomycetales|f__Micrococcaceae|g__Rothia|s__Rothia_unclassified	0	0	0.0019	0	0	0	0	0	0	0	0	0	0	0	0	0	0	0	0	0	0	0.00674	0	0.00343127	0	0	0	0	0.00213008	0	0	0	0	0	0	0	0	0	0	0	0	0	0	0	0	0
k__Bacteria|p__Actinobacteria|c__Actinobacteria|o__Bifidobacteriales|f__Bifidobacteriaceae|g__Alloscardovia|s__Alloscardovia_omnicolens	0	0	0	0	0	0	0	0	0	0.06763	0	0	0	0	0	0	0	0	0	0	0	0	0	0	0	0	0	0	0	0	0	0	0	0	0	0	0	0	0	0	0	0	0	0	0	0
k__Bacteria|p__Actinobacteria|c__Actinobacteria|o__Bifidobacteriales|f__Bifidobacteriaceae|g__Bifidobacterium|s__Bifidobacterium_adolescentis	0	6.71255	0	0	0	0	0	0	0	0.96309	0	0	0.55833	0	0	0	0	0	0.01713	0	3.47144	0	0	0.0738982	0	0	0	0	0	0.51008	0	0	0	0	0.0203634	0.0893485	4.71517	0.00325178	0	0	0	0	0	0	0	0.0129505
k__Bacteria|p__Actinobacteria|c__Actinobacteria|o__Bifidobacteriales|f__Bifidobacteriaceae|g__Bifidobacterium|s__Bifidobacterium_animalis	0	0	0	0	0	0	0	0	0	0.02	0	0	0	0	0	0	0	0	0	0	0	0	0	0	0	0	0	0	0	0	0	0	0	0	0	0	0	0	0	0	0	0	0	0	0	0.238999
k__Bacteria|p__Actinobacteria|c__Actinobacteria|o__Bifidobacteriales|f__Bifidobacteriaceae|g__Bifidobacterium|s__Bifidobacterium_bifidum	0	0.11868	0	0	0	0	0	0	0	0	0	0	0.00988	0	0	0	2.55208	0	0	0	0.571968	0	0	0.0681224	0	0	0	0	0	0	0.898465	0	0	0	0	0	0	0	0	0.0443435	0	2.789	0.216604	0	0.803667	1.23566
k__Bacteria|p__Actinobacteria|c__Actinobacteria|o__Bifidobacteriales|f__Bifidobacteriaceae|g__Bifidobacterium|s__Bifidobacterium_breve	0	0.11722	0	0	0	0	0	0	0	32.052	0	0	0	0	0	0	0	0	0	0	0	0	0	0	0	0	0	0.00354137	0	0	0	0	0	0	0	0	0	0	0	0	0	0	0	0	0	0.00109004
k__Bacteria|p__Actinobacteria|c__Actinobacteria|o__Bifidobacteriales|f__Bifidobacteriaceae|g__Bifidobacterium|s__Bifidobacterium_catenulatum	0	0	0	0	0	0	0	0	0	0	0	0	0	0	0	0	0.276564	0	0	0	0	0	0	0	0	0	0	0	0	0	0	0	0	0	0	0	0	0	0	0	0	0	0	0	0	0
k__Bacteria|p__Actinobacteria|c__Actinobacteria|o__Bifidobacteriales|f__Bifidobacteriaceae|g__Bifidobacterium|s__Bifidobacterium_dentium	0	0	0	0	0	0	0	0	0	0.01013	0	0	0	0	0	0	0	0	0	0	0	0	0	0.00218354	0	0	0	0	0	0	0	0	0	0	0	0	0	0	0	0	0	0	0	0	0.00581115	0.306182
k__Bacteria|p__Actinobacteria|c__Actinobacteria|o__Bifidobacteriales|f__Bifidobacteriaceae|g__Bifidobacterium|s__Bifidobacterium_longum	0.00227	7.34721	0	0	0	0	0	0.19389	0	0.01269	0	1.39272	0.0071	0.43429	0.0744011	0.75597	3.00239	0	0	0.255043	0.20886	0	0.00227277	0.0118334	0	0	0.0338148	4.47413	0.0292511	0	0	0	0.0923539	1.99225	0.138033	1.06974	0.71075	0.0884084	0.15449	0	0	3.88353	0.223172	0	0.18625	0.990347
k__Bacteria|p__Actinobacteria|c__Actinobacteria|o__Bifidobacteriales|f__Bifidobacteriaceae|g__Bifidobacterium|s__Bifidobacterium_pseudocatenulatum	0.0037	2.34489	0	0	0	0.0043	0	0	0	0	0.0389883	0.14628	0	0.05281	0	0	3.93173	0	0.25073	0	0.0614141	0.73725	0	0.262256	0.03649	0	0.0925029	0	0.00353014	0	0.108943	0.61636	0.221362	0	0.0650809	4.1011	0.09279	0.0411825	0.01643	0	0.0117002	0	0.0327467	0.0617336	0.0957374	4.59179
k__Bacteria|p__Actinobacteria|c__Actinobacteria|o__Bifidobacteriales|f__Bifidobacteriaceae|g__Gardnerella|s__Gardnerella_vaginalis	0	0	0	0	0	0	0	0	0	0.00913	0	0	0	0.0411	0	0	0	0	0	0	0	0	0	0.000986114	0.0021	0	0	0	0.0144506	0	0	0	0	0	0	0	0	0	0	0	0	0	0	0	0	0.00955036
k__Bacteria|p__Actinobacteria|c__Actinobacteria|o__Bifidobacteriales|f__Bifidobacteriaceae|g__Parascardovia|s__Parascardovia_denticolens	0	0	0	0	0	0	0	0	0	0	0.00143947	0	0	0	0	0	0	0	0	0	0	0	0	0	0	0	0	0	0	0	0	0	0	0	0	0	0	0	0	0	0	0	0	0	0	0
k__Bacteria|p__Actinobacteria|c__Actinobacteria|o__Bifidobacteriales|f__Bifidobacteriaceae|g__Scardovia|s__Scardovia_inopinata	0	0	0	0	0	0	0	0	0	0.0052	0	0	0	0	0	0	0	0	0	0	0	0	0	0	0	0	0	0	0	0	0	0	0	0	0	0	0	0	0	0	0	0	0	0	0	0
k__Bacteria|p__Actinobacteria|c__Actinobacteria|o__Bifidobacteriales|f__Bifidobacteriaceae|g__Scardovia|s__Scardovia_unclassified	0	0	0	0	0	0	0	0	0	0	0	0	0	0	0	0.04794	0.0100934	0	0	0	0	0	0	0	0	0	0	0.00859332	0	0	0	0	0	0	0	0	0	0	0	0	0.0054501	0	0	0	0	0
k__Bacteria|p__Actinobacteria|c__Actinobacteria|o__Bifidobacteriales|f__Bifidobacteriaceae|g__Scardovia|s__Scardovia_wiggsiae	0	0	0	0	0.0089	0	0	0	0	0.00543	0	0	0	0	0	0.02582	0	0	0	0	0	0	0	0	0	0	0	0.00102039	0	0	0	0.00215014	0	0	0	0.0155815	0	0	0	0	0	0	0	0	0	0
k__Bacteria|p__Actinobacteria|c__Actinobacteria|o__Coriobacteriales|f__Coriobacteriaceae|g__Adlercreutzia|s__Adlercreutzia_equolifaciens	0	0.00562	0	0.00184	0	0	0	0	0	0	0.0021439	0	0.00241	0.00514	0	0	0	0.158558	0.01409	0.00914225	0.052837	0	0	0	0	0.0487141	0.011275	0.0921956	0	0	0	0	0	0.0594548	0.0936056	0	0.03291	0	0.13048	0	0.0239404	0	0	0.143112	0	0
k__Bacteria|p__Actinobacteria|c__Actinobacteria|o__Coriobacteriales|f__Coriobacteriaceae|g__Atopobium|s__Atopobium_parvulum	0.00281	0	0	0	0.0008	0	0	0.01031	0	0.00515	0	0	0	0	0.00646009	0	0.00948323	0	0	0.0118129	0	0	0	0.00439726	0	0	0	0	0	0	0	0	0	0	0	0.0258025	0	0	0	0	0	0.00236324	0	0	0	0
k__Bacteria|p__Actinobacteria|c__Actinobacteria|o__Coriobacteriales|f__Coriobacteriaceae|g__Atopobium|s__Atopobium_rimae	0	0	0	0	0	0	0	0	0	0	0	0	0	0	0	0	0.00180061	0	0	0	0	0	0	0	0	0	0	0	0	0	0	0	0	0	0	0.00230022	0	0	0	0	0	0	0	0	0	0
k__Bacteria|p__Actinobacteria|c__Actinobacteria|o__Coriobacteriales|f__Coriobacteriaceae|g__Atopobium|s__Atopobium_vaginae	0	0	0	0	0	0	0	0	0	0.00113	0	0	0	0.01392	0	0	0	0	0	0	0	0	0	0	0	0	0	0	0	0	0	0	0	0	0	0	0	0	0	0	0	0	0	0	0	0
k__Bacteria|p__Actinobacteria|c__Actinobacteria|o__Coriobacteriales|f__Coriobacteriaceae|g__Collinsella|s__Collinsella_aerofaciens	0.02467	1.6797	0	0.03865	0	0	2.64047	0.37219	0	0	0.0191828	0.08117	0.03636	0.47734	0	0	0.361963	0.121413	0.09323	0	0.756421	0	0.0299281	0.0436909	0	0.126861	0.934322	0	0	0	0.069661	0	0	0	0.103577	0.94118	0.19389	0.0664364	0.29705	0.0849251	0.227024	0.516579	0.0982703	0.192413	0.258985	0
k__Bacteria|p__Actinobacteria|c__Actinobacteria|o__Coriobacteriales|f__Coriobacteriaceae|g__Collinsella|s__Collinsella_intestinalis	0	0	0	0	0	0	0	0	0	0	0	0	0	0	0	0	0	0	0	0	0	0	0	0	0	0	0	0	0	1.25457	0	0.200163	0	0	0	0	0	0	0	0	0	0	0	0	0	0
k__Bacteria|p__Actinobacteria|c__Actinobacteria|o__Coriobacteriales|f__Coriobacteriaceae|g__Collinsella|s__Collinsella_tanakaei	0	0	0	0	0	0	0	0	0	0	0	0	0	0	0	0	0	0	0	0	0	0	0	0	0.19338	0	0.0440638	0.783342	0	0	0	0	0.0943741	0	0.122971	0	0	0	0	0	0	0	0	0	0	0
k__Bacteria|p__Actinobacteria|c__Actinobacteria|o__Coriobacteriales|f__Coriobacteriaceae|g__Collinsella|s__Collinsella_unclassified	0	0	0	0	0	0	0	0	0	0	0	0	0	0	0	0.00761	0	0	0	0	0	0	0	0	0	0	0	0	0	0.0612724	0	0.077075	0	0	0	0	0	0	0	0	0	0	0	0	0	0
k__Bacteria|p__Actinobacteria|c__Actinobacteria|o__Coriobacteriales|f__Coriobacteriaceae|g__Coriobacteriaceae_noname|s__Coriobacteriaceae_bacterium_phI	0	0	0	0	0	0	0	0	0	0	0	0	0	0	0	0	0	0	0	0	0	0	0	0	0.01304	0	0	0	0	0	0	0.000550035	0	0	0	0	0	0	0	0	0	0	0	0	0	0
k__Bacteria|p__Actinobacteria|c__Actinobacteria|o__Coriobacteriales|f__Coriobacteriaceae|g__Eggerthella|s__Eggerthella_lenta	0	0	0.0031	0	0	0	0	0	0	0.02039	0	0	0	0.01353	0	0.00233	0	0	0	0.00667164	0	0	0	0	0	0	0	0.0281809	0.00848032	0	0	0.031342	0	0.0136442	0	0.00152015	0	0	0	0	0	0	0	0	0	0
k__Bacteria|p__Actinobacteria|c__Actinobacteria|o__Coriobacteriales|f__Coriobacteriaceae|g__Eggerthella|s__Eggerthella_unclassified	0	0	0.08434	0	0	0	0.00152	0	0	0.04088	0	0.08638	0.00022	0.0108	0.0187903	0.05432	0.0208371	0.004393	0	0.144145	0.00118374	0.08347	0	0	0.00886	0	0	0.0515399	0.0547021	0.150046	0.00072595	0.141749	0.057529	0.35381	0.00786131	0.0361235	0	0.0476461	0.01242	0	0.00954017	0.0127275	0.00241006	0.00712157	0	0.00725027
k__Bacteria|p__Actinobacteria|c__Actinobacteria|o__Coriobacteriales|f__Coriobacteriaceae|g__Gordonibacter|s__Gordonibacter_pamelaeae	0	0	0	0	0	0	0	0	0	0	0	0	0	0	0	0.00253	0	0	0	0	0	0	0	0	0	0	0	0	0.000810031	0	0	0	0	0	0	0	0	0	0	0	0	0	0	0	0	0
k__Bacteria|p__Actinobacteria|c__Actinobacteria|o__Coriobacteriales|f__Coriobacteriaceae|g__Olsenella|s__Olsenella_unclassified	0	0	0	0	0	0	0	0	0	0	0	0	0	0	0	0	0	0	0	0	0	0	0	0	0	0	0	0	0	0	0	0	0	0.0030399	0	0	0	0	0	0	0	0	0	0	0	0
k__Bacteria|p__Actinobacteria|c__Actinobacteria|o__Coriobacteriales|f__Coriobacteriaceae|g__Slackia|s__Slackia_piriformis	0	0	0	0	0	0	0	0	0	0	0	0	0	0	0	0	0	0	0	0	0	0	0	0.00527269	0.02343	0	0	0	0	0	0	0.0514433	0	0	0	0	0	0	0	0	0	0	0	0	0	0
k__Bacteria|p__Bacteroidetes|c__Bacteroidia|o__Bacteroidales|f__Bacteroidaceae|g__Bacteroides|s__Bacteroides_caccae	0.54276	0.36159	0.00526	0.03447	0	0.76424	0.31967	3.70073	0	0.02676	0.646334	1.02008	8.9763	4.94876	0.0762611	0.02639	0.682542	1.02381	0.4478	0.00170042	2.13476	2.64655	4.14646	1.50142	0.85446	0.173302	0.468026	0	1.74403	0	2.36975	1.49604	0	0	2.22901	0.573175	0	0	0.53104	0.0194503	0.0240804	0.0510801	0	0.447449	0.263856	0.0295711
k__Bacteria|p__Bacteroidetes|c__Bacteroidia|o__Bacteroidales|f__Bacteroidaceae|g__Bacteroides|s__Bacteroides_cellulosilyticus	0	0	0.00434	0	0	0	0	0.01608	0	0	0.345943	0	0	0.38112	0.0218303	0.75337	0	1.80175	0	0.00748184	3.77156	0	0.182455	0.0572751	5.22404	0.0311846	0.0580947	4.54644	0.498029	0	0.000615041	0	0.0584737	0.0922574	0.0663111	0.127832	0	0	0.35865	0	0	0.0253548	0	0.0731062	0.00852975	0
k__Bacteria|p__Bacteroidetes|c__Bacteroidia|o__Bacteroidales|f__Bacteroidaceae|g__Bacteroides|s__Bacteroides_clarus	0	0	0.00061	0.08678	0	0.00053	0.01295	0.34238	0	0	0.0117098	0	0	0	0	0.0523	0	0.106643	0.01351	0.00188046	0	1.69118	0	0.079684	0	0	0.0228315	6.92714	0	0	0	0	0	0.569794	0	0.0873083	0	0	0	0	0.00215004	0.0390736	0	0	0	0
k__Bacteria|p__Bacteroidetes|c__Bacteroidia|o__Bacteroidales|f__Bacteroidaceae|g__Bacteroides|s__Bacteroides_coprocola	6.03565	0	2.10358	0.00123	0	0	9.20094	0	0	0	0.239606	0	2.18315	0	0	0	0	6.91756	3.34624	7.07481	0	0	0	0.109891	8.62557	0	1.37146	0	0	0	0	7.53731	12.5526	0	4.18485	0.00135013	3.70035	3.71586	0	0.0259738	0	0	2.3936	0	0	0
k__Bacteria|p__Bacteroidetes|c__Bacteroidia|o__Bacteroidales|f__Bacteroidaceae|g__Bacteroides|s__Bacteroides_coprophilus	0	0	4.92492	0	0	0	0	1.40652	0	0	0	0.00045	1.00495	0	0.000290004	0	0	0	0	0	0	0	9.12031	3.32098	0	0	7.21775	0	0	0	0	0.0684744	0	0	8.08739	0	0	10.2337	0	0	0	0	0	0	0	0
k__Bacteria|p__Bacteroidetes|c__Bacteroidia|o__Bacteroidales|f__Bacteroidaceae|g__Bacteroides|s__Bacteroides_dorei	2.68357	0.47416	0.78453	0.65987	0	0	0.0965	0.00937	0.00569	0.01184	0.45861	0.23038	0.00799	0.00151	2.08279	9.32092	0	0	0.90472	0.00255063	0	1.98567	1.0186	1.21978	0.01282	0.310375	0.000995736	23.6509	20.6008	0.00232009	0.336528	2.41046	0.259654	3.66015	1.2122	0	1.83202	0	2.77868	0.0200807	0.0836215	0.00116159	0	0	0.00230425	0.025481
k__Bacteria|p__Bacteroidetes|c__Bacteroidia|o__Bacteroidales|f__Bacteroidaceae|g__Bacteroides|s__Bacteroides_eggerthii	0	20.1579	0.14534	1.83082	0	0	0	3.98363	0	0	1.09313	0	0.00141	0	0	7.64014	0	7.5655	0.56183	0	0.00187593	0	2.1323	1.44999	5.85739	0.00120133	0.00302744	0.00218084	19.3676	0	0	0	0	14.4326	0.00955159	0	2.47665	0.0266146	0	0	0	0	0	0	0	0
k__Bacteria|p__Bacteroidetes|c__Bacteroidia|o__Bacteroidales|f__Bacteroidaceae|g__Bacteroides|s__Bacteroides_faecis	0	1.80108	0.0731	0.01445	0	0	0.35764	1.81714	0	0	0	0	1.29149	0	0.000990015	0.00091	0.00615209	0	0.51576	0	0.126971	0.0006	0.0721452	0.243188	0.02273	0	0.0316926	0	0.00235009	0.000940037	0.0186731	0.0871756	0.0112666	0.0060394	0	0	0.12271	0	0.00503	0.00161085	0.00148003	0.00112154	0	0.0197944	0.00293084	0.00251009
k__Bacteria|p__Bacteroidetes|c__Bacteroidia|o__Bacteroidales|f__Bacteroidaceae|g__Bacteroides|s__Bacteroides_finegoldii	0	4.76949	0.02364	0.04023	0	0	0	0	0	0	0.487308	0	3.12877	0	0.213233	0	0	2.00239	0.9151	0	0	9.71198	1.1436	2.63325	0	0.0863959	0.404289	0	0	0	0.0810544	0.0431028	0.0427246	0.626199	4.32506	0	0.91504	0	0	0.000540287	0	0	0.043361	0.0974115	0	0
k__Bacteria|p__Bacteroidetes|c__Bacteroidia|o__Bacteroidales|f__Bacteroidaceae|g__Bacteroides|s__Bacteroides_fluxus	0	0	0	0	0	0	0	0	0	0	0	0	0	0	0	0	0	0	0	0	0	0	0	0	0	0	0	0	0	0	0	0	0	0.204441	0	0	0	0	0	0	0	0	0	0	0	0
k__Bacteria|p__Bacteroidetes|c__Bacteroidia|o__Bacteroidales|f__Bacteroidaceae|g__Bacteroides|s__Bacteroides_fragilis	0	0	0	0	0.0107	0.71386	0.01969	0.07017	0	0	0.0257676	0.05304	0.01255	0.57504	0	0	0.44062	0.137774	0	0.146726	1.75648	0	0	0	0	0.00894994	5.08922	4.58332	10.8062	5.5773	0.565707	0	0.0274881	0.137331	0.000340057	0.00585056	0	0.0100755	0	0	0.333586	0.00216297	0.0134261	0	0	0.00974037
k__Bacteria|p__Bacteroidetes|c__Bacteroidia|o__Bacteroidales|f__Bacteroidaceae|g__Bacteroides|s__Bacteroides_intestinalis	0	0	0.00138	0.48799	0	0	0	0.00369	0	0	1.98032	0	0	0	0.225313	0	0.0137347	1.1193	0.3186	0.482919	0.0503893	0.06061	0	0.0624874	0	0.059416	0.0537999	0.631624	0.00375014	0	0.00601934	0	0.0206437	0	0.412619	0	0.04654	0	0.24391	0	0	0	0	0.0685652	0	0.0170106
k__Bacteria|p__Bacteroidetes|c__Bacteroidia|o__Bacteroidales|f__Bacteroidaceae|g__Bacteroides|s__Bacteroides_massiliensis	0	17.1414	0.0158	0.52603	0	0	0	0	0	0	4.5018	0	0	0.00367	6.78302	16.3102	0.00044015	12.9166	9.45084	0	0.875498	11.3799	0.000452542	0	10.0679	4.38021	1.85103	0	0	0	0.00552529	3.4141	1.41988	26.1846	0.00488081	0.00262025	0.71265	0	6.54639	0.0317869	0	1.28518	4.31591	0.908671	0.00243563	0.209408
k__Bacteria|p__Bacteroidetes|c__Bacteroidia|o__Bacteroidales|f__Bacteroidaceae|g__Bacteroides|s__Bacteroides_nordii	0	0	0	0.02139	0	0.47101	0	0	0	0	0.0639494	0	0.02076	0.36212	0	0.02557	0	0.0339532	0	0.00102025	0.208108	0.07878	0.0351675	0.0354095	0.04142	0.000380422	0.00571291	0.0236291	0	0	0	0	0	0.0176031	0	0	0.03032	0.0133773	0.0308	0	0	0.005097	0	0	0	0
k__Bacteria|p__Bacteroidetes|c__Bacteroidia|o__Bacteroidales|f__Bacteroidaceae|g__Bacteroides|s__Bacteroides_oleiciplenus	0	0	0	0	0	0	0	0	0	0	0	0	0	0	0	0	0	0	0.01453	0.0918626	0	0	0	0	0	0	0	0.00319123	0	0	0.00101835	0	0	0	0.0012002	0	0	0	0	0	0	0	0	0	0	0
k__Bacteria|p__Bacteroidetes|c__Bacteroidia|o__Bacteroidales|f__Bacteroidaceae|g__Bacteroides|s__Bacteroides_ovatus	0.05481	0.02192	2.26336	0.05988	0	0.22041	0.38581	4.2254	38.7961	0.00406	1.76768	0.30739	0.03371	7.82259	0.472997	4.21252	1.78441	0.0884804	1.21741	0.148977	4.27318	6.25093	1.01435	0.521554	6.21485	0.0106518	0.326179	0.720398	0.0114204	0	0.0417119	2.14414	0.883408	0.0172901	0.922024	0.177077	1.50892	2.22803	0.69744	0.00994528	0.0191103	0.306811	0.0244822	0.637841	0.408296	0.0186707
k__Bacteria|p__Bacteroidetes|c__Bacteroidia|o__Bacteroidales|f__Bacteroidaceae|g__Bacteroides|s__Bacteroides_plebeius	1.88899	0	3.02374	0	0	0	12.5671	0	0	0	2.24822	9.49458	0.38529	0.00238	31.7433	0	0	0	0	13.1563	0.000571808	0	13.047	1.85155	0	3.5417	5.2239	0	0	0	3.40841	3.99356	23.0931	0	9.28246	0	11.2164	4.92377	6.45748	0.557616	0.229384	9.36962	3.48011	0	0	0
k__Bacteria|p__Bacteroidetes|c__Bacteroidia|o__Bacteroidales|f__Bacteroidaceae|g__Bacteroides|s__Bacteroides_salyersiae	0	0	1.47575	0	0	0	0	2.65917	2.85463	0.01227	0.450331	0	0	0	0	0	0	2.31863	0.00798	0.166011	0	0	0	0.207768	0	0.0264794	0.0450696	0	3.19113	0	0	0	0.311354	0	0	0.232852	0	0	0.21016	0	0	0	0	0.124588	0	0
k__Bacteria|p__Bacteroidetes|c__Bacteroidia|o__Bacteroidales|f__Bacteroidaceae|g__Bacteroides|s__Bacteroides_sp_1_1_6	0	0	0	0	0	0	0	0	0	0	0	0	0	0	2.93758	0	0	0	0	0	0	0	0	0	0	0	0	0	0	0	0	0	0	0	0	0	0	0	0	0	0	0	0	0	0	0
k__Bacteria|p__Bacteroidetes|c__Bacteroidia|o__Bacteroidales|f__Bacteroidaceae|g__Bacteroides|s__Bacteroides_sp_2_1_22	0	0	0	2.21571	0	0	0	0	0	0	0	0	0	0	0	0	0	0	0	0	0	0	0	0	0	0	0	0	0	0	0	0	0	0	0	0	0	0	0	0	0	0	0	0	0	0
k__Bacteria|p__Bacteroidetes|c__Bacteroidia|o__Bacteroidales|f__Bacteroidaceae|g__Bacteroides|s__Bacteroides_sp_3_1_19	0	0	0	0	0	0	0	3.64683	1.88068	0	0	0	0	0	0	0	0	0	0.52364	0	0	0	0	0	5.464	0	0.359431	0	0	0	0	0	0.83804	0	0	0	0	0	0	0	0	0	0	0	0	0
k__Bacteria|p__Bacteroidetes|c__Bacteroidia|o__Bacteroidales|f__Bacteroidaceae|g__Bacteroides|s__Bacteroides_stercoris	0.32862	4.99394	7.38761	0.00542	0	67.5275	26.8575	0	0	0.01665	0.0367831	1.55363	1.04613	16.6382	8.72893	1.71921	0.00174059	0.0159509	14.764	0.264425	3.78367	0.00298	6.39765	0.0110686	11.8387	0.775982	0.212816	0.00547211	0.00332013	0.00291011	2.17346	3.02021	12.1204	0.00693824	1.94825	0	0.23157	10.3424	12.0526	0.0378101	0.363847	0.000440605	0.276394	0.890147	0	0.639924
k__Bacteria|p__Bacteroidetes|c__Bacteroidia|o__Bacteroidales|f__Bacteroidaceae|g__Bacteroides|s__Bacteroides_thetaiotaomicron	0.18759	0.07111	0.01008	0.76765	0	1.79733	0.0659	0.0501	0	0.01225	0.235481	0.39071	1.45269	0	0	2.94378	0.152762	1.58373	0.10722	1.08061	0.774258	5.68824	1.59261	0.894888	4.03712	0.922394	0.452346	3.19726	6.17638	10.1714	0.112311	0.365063	0.301655	1.64153	6.54352	0.62371	1.97932	1.91921	0.87677	0.0128368	0.112162	0.19679	0.0608139	0.568316	0.40197	0.00783029
k__Bacteria|p__Bacteroidetes|c__Bacteroidia|o__Bacteroidales|f__Bacteroidaceae|g__Bacteroides|s__Bacteroides_uniformis	0.03788	0.36934	0.32054	0.50053	6.80967	3.98793	0.66992	1.47013	0	0	0.247743	0.05366	0.00219	10.6369	3.88983	2.21773	0.746694	19.9399	1.04298	3.5505	0.378236	35.7048	0.524536	1.64801	0.00145	0.294687	0.707828	0.866935	1.16532	23.3142	0.49902	1.80688	1.64481	7.73588	2.91666	0	1.18541	5.4451	3.29949	0.0223819	0.0928617	1.35209	0.0334697	0.308748	1.37841	0.25767
k__Bacteria|p__Bacteroidetes|c__Bacteroidia|o__Bacteroidales|f__Bacteroidaceae|g__Bacteroides|s__Bacteroides_vulgatus	0.19592	3.06343	1.87732	1.17881	33.3854	0.7841	2.78207	3.40551	0	0.02685	0.226794	0	0.67638	4.0116	2.09806	2.26367	45.5103	2.89365	0.81469	18.1927	2.87437	2.38339	0.0632452	0.227822	4.24159	0.464566	0.916771	18.2559	0.00236009	43.1128	3.7763	0.00384025	4.88669	5.02355	0.195033	4.32305	3.60451	4.75876	2.45235	0.0689966	0.222704	2.8607	0.451435	1.88894	10.2587	0.423986
k__Bacteria|p__Bacteroidetes|c__Bacteroidia|o__Bacteroidales|f__Bacteroidaceae|g__Bacteroides|s__Bacteroides_xylanisolvens	0	0.10281	0.01168	0.13547	2.43721	0	0.00316	0.00735	4.4092	0.23241	0.0467063	0.11452	0.05316	0.00104	0.00135002	1.60734	0	0.0686168	0.13706	0.0827103	0.335571	0.20899	3.89793	0.583749	0.14529	0.116319	0.227128	0.199937	1.39407	0	0.00201653	0.453709	0.0218498	0.449966	0.071792	0.299399	0.01553	0.0177497	0.08558	0	0.00128002	0	0.00805362	0.00597132	0.284302	0.00334013
k__Bacteria|p__Bacteroidetes|c__Bacteroidia|o__Bacteroidales|f__Bacteroidales_noname|g__Bacteroidales_noname|s__Bacteroidales_bacterium_ph8	0	0	0	0.02528	0	0	0	0.20627	0	0	0.0229805	0	0.06286	0	0	0.15174	0	2.84481	1.03653	0	1.79974	0	0.200587	0.306772	0	0.0673548	0.454126	0	0	0	0	0	0.129088	0.825489	0.288798	0.00915087	0	0	0.26893	0.00402213	0.0205504	0	0	0.0417992	0	0
k__Bacteria|p__Bacteroidetes|c__Bacteroidia|o__Bacteroidales|f__Porphyromonadaceae|g__Barnesiella|s__Barnesiella_intestinihominis	0	0	0	0.04515	0	0	0	0.2196	0	0	2.15865	0	0.55275	0.49124	0	1.4802	0	0.389546	1.23404	0	0	0	0	0	0	0.415982	0.0769734	0	0	0	0	0.00134009	0	0	1.1854	0.285507	0	0	0.15472	0	0.00268005	0	0	0.0304667	0.07033	0
k__Bacteria|p__Bacteroidetes|c__Bacteroidia|o__Bacteroidales|f__Porphyromonadaceae|g__Butyricimonas|s__Butyricimonas_synergistica	0	0	0	0.53474	0	0	0.08057	0	0	0	0	0	0	0	0	0	0	0	0	0	1.0295	0	0.00244373	0.073868	0	0	0.00314814	0.000340131	0	0	0	0	0	0	0.115039	0	0	0	0.00546	0	0	0	0	0	0	0
k__Bacteria|p__Bacteroidetes|c__Bacteroidia|o__Bacteroidales|f__Porphyromonadaceae|g__Coprobacter|s__Coprobacter_fastidiosus	0	0.02874	0	0	0	0	0	0	0	0	0.0999464	0	0.08731	0	0.0740311	0	0	0.455511	0.21263	0	0	0	0.178704	0	0	0	0	0	0	0	0	0	0.0912685	0	0	0	0	0	0.07658	0	0	0.00100137	0	0	0	0
k__Bacteria|p__Bacteroidetes|c__Bacteroidia|o__Bacteroidales|f__Porphyromonadaceae|g__Odoribacter|s__Odoribacter_splanchnicus	0	0	2.0538	1.25326	0	0	0	0.74435	0	0	1.43929	0	3.19526	0.31919	0	0.67656	0	2.34607	1.94753	0.421564	3.40372	0	1.15837	0.611703	0	0	1.63474	0	1.31076	0	0	0	0.671403	0	0.511105	0.320961	0	0	0.30339	0	0	0	0	0.141361	0	0
k__Bacteria|p__Bacteroidetes|c__Bacteroidia|o__Bacteroidales|f__Porphyromonadaceae|g__Odoribacter|s__Odoribacter_unclassified	0	0	0	0	0	0	0	0	0	0	0	0	0	0	0	0	0	0	0	0	0	0	0	0	0	0	0	0.326746	0	0	0.00934661	0.0093406	0	0	0	0	0	0	0	0	0.054131	0	0	0	0	0
k__Bacteria|p__Bacteroidetes|c__Bacteroidia|o__Bacteroidales|f__Porphyromonadaceae|g__Parabacteroides|s__Parabacteroides_distasonis	0.12678	0.29466	5.18667	0.04568	0	3.3211	2.20927	0.00261	0	6.39405	0.144662	0.22475	0	0.04784	8.32426	2.16522	0.00626213	0	0.8299	0.0207251	0.0266141	0.07804	0.144331	0.0169652	0	0.145151	0.0313405	0.147927	0.00154006	0	2.71868	3.13991	0.0210256	0.613393	0.00697116	0.00574055	0.13624	0.103347	0.13328	0.00273145	0.0387007	0	0.154324	0	0.359715	0.00511019
k__Bacteria|p__Bacteroidetes|c__Bacteroidia|o__Bacteroidales|f__Porphyromonadaceae|g__Parabacteroides|s__Parabacteroides_goldsteinii	0	0	0.00024	0.07799	0	0	0	0.26524	20.0235	19.0225	0	0	0	0	0.00873013	0.01241	0	0	0.00934	0	0.247763	0.41439	0.217763	0.46451	0	0.0338476	0.0918994	0	0.868043	0	0	0	0.00688458	0.0547182	0.000710118	0.00570054	0	0	0.00503	0	0	0	0	0	0.00930794	0
k__Bacteria|p__Bacteroidetes|c__Bacteroidia|o__Bacteroidales|f__Porphyromonadaceae|g__Parabacteroides|s__Parabacteroides_johnsonii	0	0	0	0.00325	0	0.00389	0	0.00434	11.1553	0	0	0	0	0	0	0	0	0	0	0	0	0	0.012289	0	0	0.000430478	0	0.00195075	0	0	0	0	0.29457	0.0614747	0	0.0768373	0	0	0.19127	0	0	0	0	0	0	0
k__Bacteria|p__Bacteroidetes|c__Bacteroidia|o__Bacteroidales|f__Porphyromonadaceae|g__Parabacteroides|s__Parabacteroides_merdae	0.32128	2.02676	5.53801	2.80266	0	0.01013	1.8636	1.46317	0	5.3531	1.65334	0.61154	1.78679	1.46285	0	1.50482	0.43986	1.56505	2.83337	1.89948	2.63354	0	1.76533	1.34533	0	0.210844	0.537416	0	4.03714	0	0.0680982	0.00122008	0	0.0107255	0.72214	1.12981	0	0	0	0.066015	0.254545	0.197621	0.131861	0.330623	0.303514	0.025661
k__Bacteria|p__Bacteroidetes|c__Bacteroidia|o__Bacteroidales|f__Porphyromonadaceae|g__Parabacteroides|s__Parabacteroides_unclassified	0	0	0	0	0	4.94132	0	2.26917	0	0	0	0	0.1819	0	0	0	0.394554	0	0	0	1.0801	0.45234	0	0	5.44759	0.373765	0.462575	3.95255	1.31364	0.00357014	0	0	0.732982	1.28175	0	0	2.05886	0.105868	0.42219	0	0	0.162353	0	0	0	0
k__Bacteria|p__Bacteroidetes|c__Bacteroidia|o__Bacteroidales|f__Porphyromonadaceae|g__Porphyromonas|s__Porphyromonas_asaccharolytica	0	0	0	0	0	0	0	0	0	0.03911	0.00100048	0.02939	0	0	0	0	0	0	0	0	0	0	0	0	0	0	0	0	0	0	0	0	0	0	0	0	0	0	0.00236	0	0	0	0	0	0	0
k__Bacteria|p__Bacteroidetes|c__Bacteroidia|o__Bacteroidales|f__Porphyromonadaceae|g__Porphyromonas|s__Porphyromonas_bennonis	0	0	0	0	0	0	0	0	0	0.00051	0.0223476	0.04816	0	0	0	0	0	0	0	0	0	0	0	0	0	0	0.00876047	0	0	0	0	0	0	0	0	0	0	0	0	0	0	0	0	0	0	0
k__Bacteria|p__Bacteroidetes|c__Bacteroidia|o__Bacteroidales|f__Porphyromonadaceae|g__Porphyromonas|s__Porphyromonas_somerae	0	0	0	0	0	0	0	0	0	0	0	0.00145	0	0	0	0	0	0	0	0	0	0	0	0	0	0	0	0	0	0	0	0	0	0	0	0	0	0	0	0	0	0	0	0	0	0
k__Bacteria|p__Bacteroidetes|c__Bacteroidia|o__Bacteroidales|f__Prevotellaceae|g__Alloprevotella|s__Alloprevotella_unclassified	0	0	0	0	0	0	0	0	0	0	0	0	0	0	0	0	0	0	0	0	0	0.08495	0	0	0	0	0	0	0	0	0	0	0.00476393	0	0	0	0	0	0	0	0	0	0	0	0	0
k__Bacteria|p__Bacteroidetes|c__Bacteroidia|o__Bacteroidales|f__Prevotellaceae|g__Paraprevotella|s__Paraprevotella_clara	0	0	1.63386	0.22369	0	0	0.25948	0.18897	0	0	0	0	0.12442	0	0	0	0	0.551376	0	0	0	0	0	0	0	0.211325	0	0	0	0	0	0	0.52563	0	0.355969	0	0	0	0	0.000360191	0.0185503	0	0	0	0	0.0117904
k__Bacteria|p__Bacteroidetes|c__Bacteroidia|o__Bacteroidales|f__Prevotellaceae|g__Paraprevotella|s__Paraprevotella_unclassified	0	0	2.15797	1.59679	0	0	1.38839	0.2749	0	0	0.35212	0	0.09186	0	0	0	0	0.657579	2.63105	0	0	0	0	0	0	1.17978	0	0	0	0	0	0.00337022	0.733123	0	0.937296	0	0	0	0	0.0248532	0.0835915	0.0318838	0	0	0	0.0717027
k__Bacteria|p__Bacteroidetes|c__Bacteroidia|o__Bacteroidales|f__Prevotellaceae|g__Paraprevotella|s__Paraprevotella_xylaniphila	0	0	0.23581	0.06844	0	0	0.00499	0.03518	0	0	0.357398	0	0.01019	0	0	0	0	0.0299704	7.20577	0	0	0	0	0	0	0.0030634	0	0	0	0	0	0	0.0597401	0	0.00881147	0	0	0	0	0	0	0	0	0	0	0
k__Bacteria|p__Bacteroidetes|c__Bacteroidia|o__Bacteroidales|f__Prevotellaceae|g__Prevotella|s__Prevotella_bivia	0	0	0	0	0	0	0	0	0	0.0523	0	0	0	0.00761	0	0	0	0	0	0	0	0	0	0	0	0	0	0	0.00561021	0	0	0	0	0	0	0	0	0	0	0	0	0	0	0	0	0
k__Bacteria|p__Bacteroidetes|c__Bacteroidia|o__Bacteroidales|f__Prevotellaceae|g__Prevotella|s__Prevotella_buccalis	0	0	0	0	0	0	0	0	0	0	0.00503305	0.04885	0	0	0	0	0	0	0	0	0	0	0	0	0	0	0.0106011	0	0	0	0	0	0	0	0	0	0	0	0.00382	0	0	0	0	0	0	0
k__Bacteria|p__Bacteroidetes|c__Bacteroidia|o__Bacteroidales|f__Prevotellaceae|g__Prevotella|s__Prevotella_copri	68.384	0.00158	39.4586	22.6583	0.00531	0.02442	0.00761	0.00139	0.0319	0	0	64.4261	26.4285	0	0.0122902	0.00715	0.0357121	0	0	0.0146836	2.60537	0	0.00212192	29.8296	0.00295	68.4819	8.75662	0.00250097	0.00108004	0.0050802	38.9298	0.0093906	0.0307545	0.014745	0	0.0360834	0	0	0.02091	58.0897	40.5821	0.0341669	30.003	58.9643	0.00846912	0.0121305
k__Bacteria|p__Bacteroidetes|c__Bacteroidia|o__Bacteroidales|f__Prevotellaceae|g__Prevotella|s__Prevotella_disiens	0	0	0	0	0	0	0	0	0	0.08288	0.00963732	0	0	0.03333	0	0	0	0	0	0	0	0	0	0	0	0	0	0	0	0	0	0	0	0	0	0	0	0	0	0	0	0	0	0	0	0
k__Bacteria|p__Bacteroidetes|c__Bacteroidia|o__Bacteroidales|f__Prevotellaceae|g__Prevotella|s__Prevotella_stercorea	0	0	0	16.8801	0	0	0	0	0	0	0	0	0	0	0	0	0	0	0	0	2.15225	0	0	1.09503	0	0	5.83327	0	0	0.0122005	22.2387	0	0.00988968	0	0	0	26.2078	0	0	3.89023	0.0280005	0	0	9.94496	0	37.389
k__Bacteria|p__Bacteroidetes|c__Bacteroidia|o__Bacteroidales|f__Prevotellaceae|g__Prevotella|s__Prevotella_timonensis	0	0	0	0	0	0	0	0	0	0	0	0	0	0.00456	0	0	0	0	0	0	0	0	0	0	0	0	0	0	0	0	0	0	0	0	0	0	0	0	0	0	0	0	0	0	0	0
k__Bacteria|p__Bacteroidetes|c__Bacteroidia|o__Bacteroidales|f__Rikenellaceae|g__Alistipes|s__Alistipes_finegoldii	0	0	0.15897	0.08907	0	0	0	0.0083	0	0	0.498721	0.0209	0.96874	0	0	0.46775	0	0.638195	0.83928	0	0.53145	0	0.413332	0.45003	0	0.0356195	0.00944441	0	0	0	0	0	0.0120103	0	0.386094	0.167596	0	0	0	0	0.00127002	0.0578594	0	0.00425094	0.0015968	0.00182007
k__Bacteria|p__Bacteroidetes|c__Bacteroidia|o__Bacteroidales|f__Rikenellaceae|g__Alistipes|s__Alistipes_indistinctus	0	0	0.08937	0	0	0	0	0	0	0	0.0100151	0	0.22075	0	0	0.00185	0	0.095255	0.04204	0	6.71828	0.37321	0.034896	0.808221	0.08115	0	0.262432	0.239422	0.0192107	0	0	0	0.244297	0.202047	0.0166628	0	1.15539	0	0.00914	0	0	0	0	0.00402089	0	0
k__Bacteria|p__Bacteroidetes|c__Bacteroidia|o__Bacteroidales|f__Rikenellaceae|g__Alistipes|s__Alistipes_onderdonkii	0	0	0.8198	0.11161	0	0	0	1.17015	0.18282	0	0.333406	0	0.7085	0.18871	0	0.00591	0	0	0.35292	0.28287	1.26713	0.32841	0.346577	0.0210203	0	0.04501	1.31372	0	1.32948	0	0.00380116	1.27253	0	0	0.0504684	0.469675	0	0	0.34777	0	0.129352	0	0.0070896	0.0252956	0	0.00448017
k__Bacteria|p__Bacteroidetes|c__Bacteroidia|o__Bacteroidales|f__Rikenellaceae|g__Alistipes|s__Alistipes_putredinis	0	0.00385	7.38559	0.91472	0	0.37588	0	0.46251	0	0	2.94122	0.00115	17.1981	0	0.0575908	3.72264	0	11.6318	17.0419	1.52823	3.92587	0	11.854	9.24708	1.26484	1.73626	7.45073	0.00170066	5.33166	0	0	0.0644041	2.68226	0	3.79538	0	0	0.01825	4.98906	0.0513573	0.00360006	0	0	0.661096	0.208686	0.0172706
k__Bacteria|p__Bacteroidetes|c__Bacteroidia|o__Bacteroidales|f__Rikenellaceae|g__Alistipes|s__Alistipes_senegalensis	0	0	0	0.03203	0	0	0	0.00464	0	0	0.0386003	0	0.00055	0	0	0.00845	0	0.46902	0.05177	0	0.0995848	0	0.00455559	0.0373516	0	0.00516574	0.0292586	0	0.00136005	0	0	0	0.0155883	0.0124828	0.00036006	0	0	0	0.00427	0	0.00884016	0	0	0.000310069	0	0
k__Bacteria|p__Bacteroidetes|c__Bacteroidia|o__Bacteroidales|f__Rikenellaceae|g__Alistipes|s__Alistipes_shahii	0	0.01847	0.38301	0.19964	0	0	0.04688	0.1378	0	0	1.46469	0.18856	0.8862	0	0	0.89171	0.0228578	3.47384	2.00956	0.0829104	0.534319	0.10282	0.65699	0.716019	0	0.268398	0.620746	0.136883	0.145126	0	0	0	1.4991	0.00249454	0.886398	0.120612	3.79701	0	0.11886	0	0.101632	0.17497	0	0.162996	0.0465902	0.00948036
k__Bacteria|p__Bacteroidetes|c__Bacteroidia|o__Bacteroidales|f__Rikenellaceae|g__Alistipes|s__Alistipes_sp_AP11	0	0	0	0	0	0	0	0.20402	0	0	0	0	0	0	0	0	0	0	0	0	0.779474	0	0	0	0	0	0.401996	0	0	0	0	0	0	0	0	0	0	0	0	0	0	0	0	0	0	0
k__Bacteria|p__Bacteroidetes|c__Bacteroidia|o__Bacteroidales|f__Rikenellaceae|g__Alistipes|s__Alistipes_unclassified	0	0	0	0	0	0	0	0	0	0.0036	0	0	0	0.02361	0	0	0	0	0	0	0	0	0	0	0	0	0	0.551063	0	0	0.00140149	0	0	1.89908	0	0.136813	0	0	0	0	0	0	0.00184771	0	0	0
k__Bacteria|p__Bacteroidetes|c__Flavobacteriia|o__Flavobacteriales|f__Flavobacteriaceae|g__Cellulophaga|s__Cellulophaga_unclassified	0	0	0	0	0	0	0	0	0	0	0.00835099	0	0	0	0	0	0	0	0	0	0	0	0	0	0	0	0	0	0	0	0	0	0	0	0	0	0	0	0	0	0	0	0	0	0	0
k__Bacteria|p__Candidatus_Saccharibacteria|c__Candidatus_Saccharibacteria_noname|o__Candidatus_Saccharibacteria_noname|f__Candidatus_Saccharibacteria_noname|g__Candidatus_Saccharibacteria_noname|s__candidate_division_TM7_single_cell_isolate_TM7b	0	0	0	0	0	0	0	0	0	0	0	0	0	0	0	0	0	0	0	0	0	0	0	0	0	0	0	0	0	0.00178007	0	0	0	0	0	0.0283727	0	0	0	0	0	0.00398547	0	0	0.00526541	0.0516819
k__Bacteria|p__Candidatus_Saccharibacteria|c__Candidatus_Saccharibacteria_noname|o__Candidatus_Saccharibacteria_noname|f__Candidatus_Saccharibacteria_noname|g__Candidatus_Saccharibacteria_noname|s__candidate_division_TM7_single_cell_isolate_TM7c	0	0	0	0	0	0	0	0	0	0	0	0	0	0	0	0	0	0	0	0.012083	0	0	0	0	0	0	0.00511949	0	0	0.0121105	0	0.0062304	0	0	0.00169028	0.0444342	0	0	0	0	0	0.0155313	0	0	0.0332196	0.0980437
k__Bacteria|p__Deinococcus_Thermus|c__Deinococci|o__Deinococcales|f__Deinococcaceae|g__Deinococcus|s__Deinococcus_unclassified	0	0	0	0	0	0	0	0	0	0	0	0	0	0	0	0	0	0	0	0	0	0	0	0	0.00602	0	0	0	0	0	0	0	0	0	0	0	0	0	0	0	0	0	0	0	0	0
k__Bacteria|p__Firmicutes|c__Bacilli|o__Bacillales|f__Bacillaceae|g__Bacillus|s__Bacillus_cereus_thuringiensis	0	0	0	0	0	0	0	0	0	0	0	0	0	0	0	0	0	0	0	0	0	0	0	0	0	0	0	0	0	0	0	0	0	0	0	0	0	0	0	0	0.0518509	0	0	0	0	0
k__Bacteria|p__Firmicutes|c__Bacilli|o__Bacillales|f__Bacillales_noname|g__Gemella|s__Gemella_haemolysans	0.01264	0	0	0	0	0	0	0	0	0	0	0	0	0	0	0.00219	0	0	0	0	0	0	0	0	0	0	0	0	0	0	0	0	0	0	0	0	0	0	0	0	0	0.00264363	0	0	0.00688242	0.00552021
k__Bacteria|p__Firmicutes|c__Bacilli|o__Bacillales|f__Bacillales_noname|g__Gemella|s__Gemella_morbillorum	0.01212	0	0.00631	0	0	0	0	0	0	0	0	0	0	0	0	0	0	0	0	0	0	0	0	0.000543369	0	0	0	0	0	0	0	0	0	0	0	0	0	0	0	0	0	0.0286293	0	0	0.0205866	0.000840032
k__Bacteria|p__Firmicutes|c__Bacilli|o__Bacillales|f__Bacillales_noname|g__Gemella|s__Gemella_sanguinis	0	0	0	0	0	0	0	0	0	0	0	0	0	0	0	0	0	0	0	0	0	0	0	0.00716442	0	0	0	0	0	0.000610024	0	0	0	0	0	0	0	0	0	0	0	0.0332757	0	0	0.0190707	0.0127305
k__Bacteria|p__Firmicutes|c__Bacilli|o__Bacillales|f__Bacillales_noname|g__Gemella|s__Gemella_unclassified	0.00216	0	0.00186	0	0	0	0	0	0	0	0.00387943	0	0	0	0	0	0	0	0	0.00714176	0	0	0	0.00263635	0.00198	0	0	0	0.000700027	0	0	0	0.00432171	0	0	0	0	0	0	0	0.00494009	0	0	0	0.00571008	0
k__Bacteria|p__Firmicutes|c__Bacilli|o__Lactobacillales|f__Aerococcaceae|g__Abiotrophia|s__Abiotrophia_defectiva	0.00053	0	0	0	0	0	0	0.00257	0.01111	0	0	0.00181	0	0	0.00169002	0	0	0	0	0.012183	0	0	0	0	0	0	0	0	0.00158006	0	0	0	0	0	0	0	0	0	0	0	0.00403007	0.0263862	0	0	0.0325829	0
k__Bacteria|p__Firmicutes|c__Bacilli|o__Lactobacillales|f__Carnobacteriaceae|g__Granulicatella|s__Granulicatella_adiacens	0.01697	0	0	0	0.00149	0	0	0.00057	0	0	0	0	0	0	0.00390006	0.00304	0	0	0	0.0321679	0	0	0	0.00630912	0	0	0	0	0.00125005	0.00117005	0	0	0	0	0	0.0477546	0	0	0	0	0.00479009	0.018205	0	0	0.0457615	0.00692026
k__Bacteria|p__Firmicutes|c__Bacilli|o__Lactobacillales|f__Carnobacteriaceae|g__Granulicatella|s__Granulicatella_elegans	0.00159	0	0	0	0	0	0	0	0	0	0	0	0	0	0	0	0	0	0	0	0	0	0	0	0	0	0	0	0	0	0	0	0	0	0	0	0	0	0	0	0	0	0	0	0.00643774	0
k__Bacteria|p__Firmicutes|c__Bacilli|o__Lactobacillales|f__Carnobacteriaceae|g__Granulicatella|s__Granulicatella_unclassified	0.02877	0.00889	0.01909	0	0.00528	0.00141	0	0	0	0	0.0121692	0	0	0	0.0175503	0.01503	0.00636216	0	0	0.0458413	0	0	0	0.035319	0.01288	0.0023426	0.00465683	0	0.0116504	0	0.0111413	0.0147609	0.0108344	0	0.00397066	0.0254224	0	0	0.00811	0	0.0324406	0.0238427	0.00705947	0	0.0447812	0.0215908
k__Bacteria|p__Firmicutes|c__Bacilli|o__Lactobacillales|f__Enterococcaceae|g__Enterococcus|s__Enterococcus_avium	0	0	0	0	0	0	0	0	0	0.01714	0	0	0	0	0	0	0	0	0	0	0	0	0	0	0	0	0	0	0	0	0	0	0	0	0	0	0	0	0	0	0	0	0	0	0	0
k__Bacteria|p__Firmicutes|c__Bacilli|o__Lactobacillales|f__Enterococcaceae|g__Enterococcus|s__Enterococcus_faecalis	0	0	0	0	0.11107	0	0	0	0.05469	0	0	0	0	0	0.0110602	0	0	0	0	0	0	0	0	0	0	0	0	0	0	0	0	0	0	0	0	0	0	0	0	0	0	0	0	0	0	0
k__Bacteria|p__Firmicutes|c__Bacilli|o__Lactobacillales|f__Enterococcaceae|g__Enterococcus|s__Enterococcus_faecium	0	0	0	0.14358	0.0598	0.12511	0	0	0	0.15209	0	0	0	0	0.513228	0	0	0	0	0	0	0	0	0	0	0	0	0	0.103124	0	0	0	0	0	0	0	0	0	0	0	0.0177103	0	0	0	0	0
k__Bacteria|p__Firmicutes|c__Bacilli|o__Lactobacillales|f__Enterococcaceae|g__Enterococcus|s__Enterococcus_gallinarum	0	0	0	0	0	0	0	0	0	0.04867	0	0	0	0	0	0	0	0	0	0	0	0	0	0	0	0	0	0	0	0	0	0	0	0	0	0.0382337	0	0	0	0	0	0	0	0	0	0
k__Bacteria|p__Firmicutes|c__Bacilli|o__Lactobacillales|f__Lactobacillaceae|g__Lactobacillus|s__Lactobacillus_brevis	0	0	0	0	0	0	0	0	0	0	0	0	0	0	0	0	0	0	0	0	0	0	0	0.00634937	0	0	0	0	0	0	0	0	0	0	0	0	0	0	0	0	0	0	0	0	0	0
k__Bacteria|p__Firmicutes|c__Bacilli|o__Lactobacillales|f__Lactobacillaceae|g__Lactobacillus|s__Lactobacillus_buchneri	0	0	0	0	0	0	0	0	0	0.03524	0	0	0	0	0	0	0	0	0	0	0	0	0	0	0	0	0	0	0	0	0	0	0	0	0	0	0	0	0	0	0	0	0	0	0	0
k__Bacteria|p__Firmicutes|c__Bacilli|o__Lactobacillales|f__Lactobacillaceae|g__Lactobacillus|s__Lactobacillus_casei_paracasei	0	0.06917	0	0	0	0	0	0	0	1.07724	0	0	0	0	0	0	0	0	0	0	0	0	0	0	0	0	0	0	0	0	0	0	0	0	0	0	0	0	0	0	0	0	0	0	0	0
k__Bacteria|p__Firmicutes|c__Bacilli|o__Lactobacillales|f__Lactobacillaceae|g__Lactobacillus|s__Lactobacillus_crispatus	0	0	0	0	0	0	0	0	0	0.03383	0	0	0	0	0	0	0	0	0	0	0	0	0	0	0	0	0	0	0	0	0	0	0	0	0	0	0	0	0	0	0	0	0	0	0.0441041	0
k__Bacteria|p__Firmicutes|c__Bacilli|o__Lactobacillales|f__Lactobacillaceae|g__Lactobacillus|s__Lactobacillus_farciminis	0	0	0	0	0	0	0	0	0	0.10783	0	0	0	0	0	0	0	0	0	0	0	0	0	0	0	0	0	0	0	0	0	0	0	0	0	0	0	0	0	0	0	0	0	0	0	0
k__Bacteria|p__Firmicutes|c__Bacilli|o__Lactobacillales|f__Lactobacillaceae|g__Lactobacillus|s__Lactobacillus_fermentum	0	0	0	0	0	0	0	0	0	0	0	0	0	0	0	0.05466	0	0	0	0	0	0	0	0	0	0	0	0	0	0	0	0	0	0	0	0	0	0	0	0	0	0	0	0	0.142803	0
k__Bacteria|p__Firmicutes|c__Bacilli|o__Lactobacillales|f__Lactobacillaceae|g__Lactobacillus|s__Lactobacillus_gasseri	0	0	0	0	0	0	0	0	0	0.51265	0	0	0	0	0	0	0	0	0	0	0	0	0	0	0	0	0	0	0	0	0	0	0	0	0	0	0	0	0	0	0	0	0	0	0	0
k__Bacteria|p__Firmicutes|c__Bacilli|o__Lactobacillales|f__Lactobacillaceae|g__Lactobacillus|s__Lactobacillus_helveticus	0	0	0	0	0	0	0	0	0	0	0	0	0	0	0	0.00102	0	0	0	0	0	0	0	0	0	0	0	0	0	0	0	0	0	0	0	0	0	0	0	0	0	0	0	0	0	0
k__Bacteria|p__Firmicutes|c__Bacilli|o__Lactobacillales|f__Lactobacillaceae|g__Lactobacillus|s__Lactobacillus_ingluviei	0	0	0	0	0	0	0	0	0	0.00236	0	0	0	0	0	0	0	0	0	0	0	0	0	0	0	0	0	0	0	0	0	0	0	0	0	0	0	0	0	0	0	0	0	0	0	0
k__Bacteria|p__Firmicutes|c__Bacilli|o__Lactobacillales|f__Lactobacillaceae|g__Lactobacillus|s__Lactobacillus_mucosae	0	0	0	0	0	0	0	0	0	14.9877	0	0	0	0	0	0	0	0	0	0	0	0	0	0	0	0	0	0	0	0	0	0	0	0	0	0	0	0	0	0	0	0	0	0	0	0.121375
k__Bacteria|p__Firmicutes|c__Bacilli|o__Lactobacillales|f__Lactobacillaceae|g__Lactobacillus|s__Lactobacillus_oris	0	0	0	0	0	0	0	0	0	0.01172	0	0	0	0	0	0	0	0	0	0	0	0	0	0	0	0	0	0	0	0	0	0	0	0	0	0	0	0	0	0	0	0	0	0	0	0
k__Bacteria|p__Firmicutes|c__Bacilli|o__Lactobacillales|f__Lactobacillaceae|g__Lactobacillus|s__Lactobacillus_plantarum	0	0	0	0	0	0.03472	0	0.02702	0	0.00112	0	0	0	0	0	0	0	0	0	0	0	0	0	0.0127792	0	0	0	0	0	0	0	0	0	0	0	0	0	0	0	0	0	0	0	0	0	0
k__Bacteria|p__Firmicutes|c__Bacilli|o__Lactobacillales|f__Lactobacillaceae|g__Lactobacillus|s__Lactobacillus_rhamnosus	0	0	0	0	0	0	0	0	0	1.00128	0	0	0	0	0	0	0	0	0	0	0	0	0	0	0	0	0	0	0	0	0	0	0	0	0	0	0	0	0	0	0	0	0	0	0	0
k__Bacteria|p__Firmicutes|c__Bacilli|o__Lactobacillales|f__Lactobacillaceae|g__Lactobacillus|s__Lactobacillus_ruminis	0	0	0	0	0	0	0	0	0	0.19563	0	0	0	0	0	0	0	0	0	0	0	0	0	0	0	0	0	0	0	0	0	0	0	0	0	0	0	0	0	0	0.131292	0	0	0	0	0
k__Bacteria|p__Firmicutes|c__Bacilli|o__Lactobacillales|f__Lactobacillaceae|g__Lactobacillus|s__Lactobacillus_salivarius	0	0	0	0	0	0	0	0	0	0.42591	0	0	0	0	0	0	0	0	0	0	0	0	0	0	0	0	0	0	0	0	0	0	0	0	0	0	0	0	0	0	0	0	0	0	0	0.149246
k__Bacteria|p__Firmicutes|c__Bacilli|o__Lactobacillales|f__Lactobacillaceae|g__Lactobacillus|s__Lactobacillus_sanfranciscensis	0	0.01768	0	0	0	0.06992	0	0.11743	0	0	0	0	0	0	0	0	0	0	0	0	0	0	0	0	0	0	0	0	0	0	0	0	0	0	0	0	0	0	0	0	0	0	0	0	0	0
k__Bacteria|p__Firmicutes|c__Bacilli|o__Lactobacillales|f__Leuconostocaceae|g__Leuconostoc|s__Leuconostoc_citreum	0.00464	0	0	0	0	0	0	0	0	0	0	0	0	0	0	0	0	0	0	0	0	0	0	0	0	0	0	0	0	0	0	0	0	0	0	0	0	0	0	0	0	0	0	0	0	0
k__Bacteria|p__Firmicutes|c__Bacilli|o__Lactobacillales|f__Leuconostocaceae|g__Leuconostoc|s__Leuconostoc_lactis	0	0	0	0	0	0	0	0	0	0	0	0	0	0	0	0	0	0	0	0	0	0	0	0	0	0	0	0	0	0	0	0	0	0	0	0.10172	0	0	0	0	0	0	0	0	0	0
k__Bacteria|p__Firmicutes|c__Bacilli|o__Lactobacillales|f__Leuconostocaceae|g__Leuconostoc|s__Leuconostoc_unclassified	0	0	0	0	0	0	0	0	0	0	0	0	0	0	0	0	0	0	0	0	0	0	0	0	0	0	0	0	0	0	0	0	0	0	0	0	0	0	0	0	0.0129502	0	0	0	0	0
k__Bacteria|p__Firmicutes|c__Bacilli|o__Lactobacillales|f__Leuconostocaceae|g__Weissella|s__Weissella_cibaria	0	0	0	0	0	0	0	0.00277	0	0	0.00186825	0.01367	0	0	0	0	0.0128244	0	0	0	0	0	0	0.0251761	0	0	0	0	0	0	0	0	0	0	0	0.0919388	0	0	0	0	0	0	0.0024201	0	0	0
k__Bacteria|p__Firmicutes|c__Bacilli|o__Lactobacillales|f__Leuconostocaceae|g__Weissella|s__Weissella_confusa	0	0	0	0	0	0	0	0	0	0	0	0	0	0.01278	0	0	0	0	0	0	0	0	0	0.103562	0	0	0	0	0	0	0	0.0444429	0	0	0	1.00453	0	0	0	0	0	0	0	0	0	0
k__Bacteria|p__Firmicutes|c__Bacilli|o__Lactobacillales|f__Leuconostocaceae|g__Weissella|s__Weissella_unclassified	0	0	0	0	0	0	0	0	0	0	0	0	0	0.00382	0	0	0	0	0	0	0	0	0	0.0654256	0	0	0	0	0	0	0	0	0	0	0	0.174967	0	0	0	0	0	0	0	0	0	0
k__Bacteria|p__Firmicutes|c__Bacilli|o__Lactobacillales|f__Streptococcaceae|g__Lactococcus|s__Lactococcus_garvieae	0	0	0	0	0	0	0	0	0	0	0	0	0	0.00696	0	0	0	0	0	0	0	0	0	0.0103944	0	0	0	0	0.00970037	0	0	0	0	0	0	0	0	0	0	0.0193102	0.607151	0	0	0	0	0
k__Bacteria|p__Firmicutes|c__Bacilli|o__Lactobacillales|f__Streptococcaceae|g__Lactococcus|s__Lactococcus_lactis	0	0	0	0	0	0.00305	0	0	0	0	0	0	0	0	0	0	0	0	0	0	0	0	0	0.0205675	0	0	0	0	0	0	0	0	0	0	0	0	0	0	0	0	0	0	0	0	0	0
k__Bacteria|p__Firmicutes|c__Bacilli|o__Lactobacillales|f__Streptococcaceae|g__Streptococcus|s__Streptococcus_anginosus	0	0	0	0	0	0	0	0	0	0.10995	0	0	0	0	0	0	0	0	0	0	0	0	0	0.0397666	0.00469	0	0	0	0	0	0	0	0	0	0	0	0	0	0.00633	0	0	0	0	0	0.0117638	0.0197807
k__Bacteria|p__Firmicutes|c__Bacilli|o__Lactobacillales|f__Streptococcaceae|g__Streptococcus|s__Streptococcus_australis	0.02321	0	0	0	0.01732	0.03176	0.00165	0.02429	0	0	0.0157934	0	0	0.0059	0.00100001	0.07083	0.0199068	0	0	0	0.00150476	0	0	0.00512175	0.04656	0	0.0384012	0	0.00562022	0.0186307	0	0.0214514	0.0450563	0	0.0252042	0.00723069	0	0	0.00609	0	0.00649012	0.0482462	0	0	0.0674194	0.0446517
k__Bacteria|p__Firmicutes|c__Bacilli|o__Lactobacillales|f__Streptococcaceae|g__Streptococcus|s__Streptococcus_cristatus	0	0	0	0	0.02219	0	0	0	0	0	0	0	0	0	0	0	0	0	0	0	0	0	0	0.0103542	0	0	0	0	0	0	0	0	0	0	0	0	0	0	0	0	0	0	0	0	0.000980315	0.000720027
k__Bacteria|p__Firmicutes|c__Bacilli|o__Lactobacillales|f__Streptococcaceae|g__Streptococcus|s__Streptococcus_gallolyticus	0	0	0	0	0	0	0	0	0	0	0	0	0	0	0	0	0	0	0	0	0	0	0	0	0	0	0	0	0	0.0708028	0	0	0	0	0	0	0	0	0	0	0	0	0	0	0	0
k__Bacteria|p__Firmicutes|c__Bacilli|o__Lactobacillales|f__Streptococcaceae|g__Streptococcus|s__Streptococcus_gordonii	0	0	0	0	0.00909	0	0	0.00879	0	0	0	0.00539	0	0	0	0	0	0	0	0	0	0	0	0.0149326	0	0	0	0	0	0	0	0	0	0	0	0	0	0	0	0	0	0.000751031	0	0	0.0169382	0.00934035
k__Bacteria|p__Firmicutes|c__Bacilli|o__Lactobacillales|f__Streptococcaceae|g__Streptococcus|s__Streptococcus_infantarius	0	0	0	0	0.00076	0	0	0	0	0	0	0	0	0.00351	0	0	0	0	0	0	0	0	0	0.149155	0	0	0	0	0	0	0	0	0	0	0	0.689336	0	0	0	0	0	0	0	0	0	0
k__Bacteria|p__Firmicutes|c__Bacilli|o__Lactobacillales|f__Streptococcaceae|g__Streptococcus|s__Streptococcus_infantis	0.01798	0	0.00267	0	0	0	0.00064	0.01855	0	0.00211	0	0	0.00112	0	0.0336505	0.01622	0.002941	0	0	0.0147336	0.00380202	0	0	0.0834675	0.02119	0	0.00191101	0	0	0	0	0	0.0131762	0	0	0	0	0	0	0	0.00056001	0.00754035	0	0	0.0066904	0
k__Bacteria|p__Firmicutes|c__Bacilli|o__Lactobacillales|f__Streptococcaceae|g__Streptococcus|s__Streptococcus_lutetiensis	0	0	0	0	0	0	0	0	0	0	0	0	0	0	0	0	0.0070524	0	0	0	0	0	0	0	0	0	0	0	0	0	0	0	0	0	0	0	0	0	0	0	0	0	0	0	0	0
k__Bacteria|p__Firmicutes|c__Bacilli|o__Lactobacillales|f__Streptococcaceae|g__Streptococcus|s__Streptococcus_macedonicus	0	0	0	0	0	0	0	0	0	0	0	0	0	0	0	0	0	0	0	0	0	0	0	0	0	0	0	0	0	0	0	0	0	0	0	0.0166916	0	0	0	0	0	0	0	0	0.00188989	0
k__Bacteria|p__Firmicutes|c__Bacilli|o__Lactobacillales|f__Streptococcaceae|g__Streptococcus|s__Streptococcus_mitis_oralis_pneumoniae	0.04873	0	0.00689	0	0.00146	0.01201	0.0006	0.00848	0	0.00149	0.00492075	0.00023	0.0045	0.00458	0.00070001	0.01878	0.00397135	0	0	0.0197148	0	0	0	0.120598	0.00145	0	0	0	0.00151006	0	0	0	0	0	0	0.0645862	0	0	0	0	0.0187503	0.0481461	0	0	0.124389	0.0503419
k__Bacteria|p__Firmicutes|c__Bacilli|o__Lactobacillales|f__Streptococcaceae|g__Streptococcus|s__Streptococcus_oligofermentans	0	0	0	0	0	0	0	0	0	0	0	0	0	0	0	0	0	0	0	0	0	0	0	0	0	0	0	0	0	0	0	0	0	0	0	0	0	0	0	0	0	0	0	0	0	0.00144005
k__Bacteria|p__Firmicutes|c__Bacilli|o__Lactobacillales|f__Streptococcaceae|g__Streptococcus|s__Streptococcus_parasanguinis	0.00375	0.06519	0.01211	0	0.16042	0.00097	0.00764	0.09184	0.01666	0.1502	0	0.06714	0.01293	0	0.0603909	0.09483	0.0858792	0	0	0.0331782	0.0272863	0.09339	0.00747197	2.36559	0	0.00365406	0	0.0324925	0	0.00843033	0	0	0	0	0	0.0399538	0	0.0322276	0.04548	0	0	0	0	0	0.0239722	0.0738228
k__Bacteria|p__Firmicutes|c__Bacilli|o__Lactobacillales|f__Streptococcaceae|g__Streptococcus|s__Streptococcus_pasteurianus	0	0	0	0	0	0	0	0	0	0	0	0	0	0	0	0	0.217264	0	0	0	0	0	0	0	0	0	0	0	0	0	0	0	0	0	0	0	0	0	0	0	0	0	0	0	0	0
k__Bacteria|p__Firmicutes|c__Bacilli|o__Lactobacillales|f__Streptococcaceae|g__Streptococcus|s__Streptococcus_pseudopneumoniae	0	0	0	0	0	0	0	0	0	0	0	0	0	0	0	0	0	0	0	0	0	0	0	0	0	0	0	0	0	0	0	0	0	0	0	0	0	0	0	0	0	0	0	0	0	0.00194007
k__Bacteria|p__Firmicutes|c__Bacilli|o__Lactobacillales|f__Streptococcaceae|g__Streptococcus|s__Streptococcus_salivarius	0.092	0	0.00796	0	0	0.00219	0	0.1452	0.208	1.4686	0.0125367	0.16661	0.02196	0	0	0.43583	0.233079	0.0758517	0	0.124981	0.337336	0.76252	0.123494	5.01412	0.23069	0.0362402	0.0032286	0.101029	0.0165706	0.0711828	0.0233514	0.0673443	0.0583531	0.0196533	0.0106018	0.0578055	0.09745	0.886525	0.14218	0.00467248	0.0775614	0.030602	0.0329877	0	0.937161	0.201338
k__Bacteria|p__Firmicutes|c__Bacilli|o__Lactobacillales|f__Streptococcaceae|g__Streptococcus|s__Streptococcus_sanguinis	0.00778	0	0	0	0.00302	0.00141	0	0.00177	0.03336	0	0.00835099	0.00624	0	0	0.00300004	0.00423	0	0	0	0.0137034	0	0.00881	0	0	0.00037	0	0	0	0	0.00554022	0	0	0	0	0.0167128	0.0241723	0	0	0.00611	0	0.0141403	0.0626961	0	0	0.225614	0.0423516
k__Bacteria|p__Firmicutes|c__Bacilli|o__Lactobacillales|f__Streptococcaceae|g__Streptococcus|s__Streptococcus_thermophilus	0	0	0	0	0	0	0	0	0	1.38996	0	0	0	0	0	0	0	0	0	0	0	0	0	0.0486617	0	0	0	0	0	0	0	0	0	0	0	0	0	0	0	0	0	0	0	0	0.0137547	0
k__Bacteria|p__Firmicutes|c__Bacilli|o__Lactobacillales|f__Streptococcaceae|g__Streptococcus|s__Streptococcus_tigurinus	0	0	0	0	0	0	0	0	0	0	0	0	0	0	0	0	0	0	0	0	0	0	0	0.0300664	0.00067	0	0	0	0	0	0	0	0	0	0	0	0	0	0	0	0	0	0	0	0	0.00209008
k__Bacteria|p__Firmicutes|c__Bacilli|o__Lactobacillales|f__Streptococcaceae|g__Streptococcus|s__Streptococcus_vestibularis	0	0	0	0	0	0	0	0	0	0.08734	0	0	0	0	0	0	0	0	0	0	0	0	0.0135561	0.249527	0	0	0	0	0	0	0	0	0	0	0	0	0	0	0	0	0	0	0	0	0.192586	0
k__Bacteria|p__Firmicutes|c__Clostridia|o__Clostridiales|f__Clostridiaceae|g__Butyricicoccus|s__Butyricicoccus_pullicaecorum	0	0	0	0	0	0	0	0	0	0	0	0	0	0	0	0	0	0	0	0	0	0.13039	0	0	0	0	0	0	0	0	0	0	0	0	0	0	0	0	0	0	0	0	0	0	0	0
k__Bacteria|p__Firmicutes|c__Clostridia|o__Clostridiales|f__Clostridiaceae|g__Clostridiaceae_noname|s__Clostridiaceae_bacterium_JC118	0	0.06807	0	0	0	0	0.00752	0	0	0	0	0	0	0	0	0.00092	0	0	0	0	0	0.03937	0.0538927	0.0101026	0	0	0	0.0101439	0	0	0	0	0	0.0278944	0	0	0	0	0	0	0	0	0	0	0	0
k__Bacteria|p__Firmicutes|c__Clostridia|o__Clostridiales|f__Clostridiaceae|g__Clostridium|s__Clostridium_asparagiforme	0	0	0	0.14392	0	0.27964	0	0	0	0	0.00443072	0	0.01236	0	0	0.03737	0	0	0	0.0963137	0.014245	0	0.0679718	0	0.01077	0	0.00483787	0	0.156676	0	0	0	0.00776903	0.047073	0.0789032	0.0219921	0	0	0	0	0	0	0	0	0	0
k__Bacteria|p__Firmicutes|c__Clostridia|o__Clostridiales|f__Clostridiaceae|g__Clostridium|s__Clostridium_bolteae	0.00016	0.24696	0	0.33839	0.23141	2.73747	0.40652	0.23099	6.64569	0	0.00094944	0	0.01082	0.04895	11.131	0.03718	0.0717344	0	0	0.100095	0.0076241	1.38628	0.0741666	0	0.06989	0.00929032	0.038542	0.288781	0.170927	0.968398	0.0377998	0.139629	0.0161813	0.356204	0.0205434	0.0617859	0.00855	0.0160188	0.00722	0	0	0.0441005	0.0157759	0	0	0.00189007
k__Bacteria|p__Firmicutes|c__Clostridia|o__Clostridiales|f__Clostridiaceae|g__Clostridium|s__Clostridium_butyricum	0	0	0	0	0	0	0	0	0	0	0	0	0	0	0	0	0.155403	0	0	0	0	0	0	0	0	0	0	0	0	0	0	0	0	0	0	0	0	0	0	0	0	0	0	0	0	0
k__Bacteria|p__Firmicutes|c__Clostridia|o__Clostridiales|f__Clostridiaceae|g__Clostridium|s__Clostridium_celatum	0	0	0	0	0	0	0	0	0	0	0	0	0	0	0	0	0	0	0	0	0	0	0	0	0	0	0	0	0	0	0	0	0	0	0	0.0111311	0	0	0	0	0	0	0	0	0	0.0326112
k__Bacteria|p__Firmicutes|c__Clostridia|o__Clostridiales|f__Clostridiaceae|g__Clostridium|s__Clostridium_citroniae	0	0	0	0.01223	0	0	0.04286	0.03481	0	0	0	0	0.00828	0.05775	0	0.00631	0	0	0	0.0101125	0.0120581	0	0.0224863	0	0.08188	0	0.0215341	0.0159862	0.0324212	0	0	0.015571	0.0191663	0.0511531	0	0.000760073	0.00532	0	0.00037	0	0	0	0	0.00927205	0	0
k__Bacteria|p__Firmicutes|c__Clostridia|o__Clostridiales|f__Clostridiaceae|g__Clostridium|s__Clostridium_clostridioforme	0	0	0.0457	0	0	0	0	0	0	0	0	0	0	0.00525	0	0.07466	0.00450153	0	0	0	0	0.30172	0	0	0	0	0	0.00649251	0.140685	0.624335	0.0449484	0	0	0	0	0.00465044	0	0	0	0	0	0.0188959	0	0	0	0
k__Bacteria|p__Firmicutes|c__Clostridia|o__Clostridiales|f__Clostridiaceae|g__Clostridium|s__Clostridium_hathewayi	0	0	0	0.00693	0	0	0	0.04385	0	0	0.00230724	0	0.01306	0.96794	0.200873	0.015	0	0	0	0.00607149	0.00144457	0.05946	0.00718033	0	0.01153	0	0.153534	0.041436	0.0217608	0.025621	0	0.00243016	0.0128345	0.13017	0.035926	0.00707068	0	0	0	0	0	0.00742019	0.00681847	0	0	0
k__Bacteria|p__Firmicutes|c__Clostridia|o__Clostridiales|f__Clostridiaceae|g__Clostridium|s__Clostridium_hylemonae	0	0	0	0	0	0	0	0	0	0	0	0	0	0	0	0	0	0	0	0	0	0	0	0	0	0	0	0	0.00768029	0	0	0	0	0	0	0	0	0	0	0	0	0	0	0	0	0
k__Bacteria|p__Firmicutes|c__Clostridia|o__Clostridiales|f__Clostridiaceae|g__Clostridium|s__Clostridium_leptum	0	0	0	0.03984	0	0	0	0.06624	0	0	0.0115566	0	0.02274	0	0	0	0	0.0225554	0.1925	0	0.0691887	0	0.0767913	0	0.03508	0.00276307	0.0108324	0.0170466	0	0	0	0	0	0.00674636	0.071802	0	0	0	0.00285	0	0	0	0	0	0	0
k__Bacteria|p__Firmicutes|c__Clostridia|o__Clostridiales|f__Clostridiaceae|g__Clostridium|s__Clostridium_nexile	0	0	0	0.00188	0	0	0.92073	0	0	0.41395	0	0	0	0.4287	0	0	0	0	0	0.00220054	0	0.67337	0	0	0	0.0215439	0	0	0	0.300882	0	0.0182912	0.00279403	0.0151995	0	0	0	0.267036	0	0	0	0	0.356519	0	0	0.0080903
k__Bacteria|p__Firmicutes|c__Clostridia|o__Clostridiales|f__Clostridiaceae|g__Clostridium|s__Clostridium_perfringens	0	0	0	0	0	0	0	0	0	0	0	0	0	0	0	0.02365	0	0	0	0	0	0	0	0	0	0	0	0	0	0	0	0	0	0	0	0	0	0.0701684	0	0	0.244914	0	0.0942033	0	0	0.0702026
k__Bacteria|p__Firmicutes|c__Clostridia|o__Clostridiales|f__Clostridiaceae|g__Clostridium|s__Clostridium_scindens	0	0	0	0	0	0	0	0	0	0	0.00210306	0	0	0	0	0	0	0	0	0	0	0	0	0	0	0	0	0	0	0.000570022	0	0	0	0	0	0	0	0	0	0	0	0	0	0	0	0
k__Bacteria|p__Firmicutes|c__Clostridia|o__Clostridiales|f__Clostridiaceae|g__Clostridium|s__Clostridium_sp_7_2_43FAA	0	0	0	0	0	0	0	0	0	0	0	0	0	0	0	0	0	0	0	0	0	1.12071	0	0	0	0	0.355941	0.997485	0.345883	0	0	0	0	0	0	0	0	0	0	0	0	0	0	0	0	0
k__Bacteria|p__Firmicutes|c__Clostridia|o__Clostridiales|f__Clostridiaceae|g__Clostridium|s__Clostridium_sp_L2_50	0	0	0	0	0	0	0	0	0	0	0	0	0	0	0	0	0	0	0	0	0	0	0	0	0	0	0	1.01691	0	0	0	1.49625	0	0	0	0	0	0	0	0.121524	0	0	0	0.395457	0	0
k__Bacteria|p__Firmicutes|c__Clostridia|o__Clostridiales|f__Clostridiaceae|g__Clostridium|s__Clostridium_symbiosum	0	0	0	0	0	0	0.01351	0	0	0	0	0	0.00781	0.01683	0	0.13973	0	0	0	0.0270467	0.00472494	0.05548	0.06944	0	0.02129	0	0	0.0261401	0.00981038	0	0	0.0958362	0.00239202	0.0150379	0.0041907	0.0565054	0.01319	0	0	0	0	0.00661909	0	0.000310069	0	0
k__Bacteria|p__Firmicutes|c__Clostridia|o__Clostridiales|f__Clostridiales_Family_XI_Incertae_Sedis|g__Finegoldia|s__Finegoldia_magna	0	0	0	0	0	0	0	0	0	0	0	0	0	0	0	0	0	0	0	0	0	0	0	0	0	0	0	0	0	0	0	0	0	0	0	0	0	0	0.00303	0	0	0	0	0	0	0
k__Bacteria|p__Firmicutes|c__Clostridia|o__Clostridiales|f__Clostridiales_Family_XI_Incertae_Sedis|g__Anaerococcus|s__Anaerococcus_vaginalis	0	0	0	0	0	0	0	0	0	0	0	0.00174	0	0	0	0	0	0	0	0	0	0	0	0	0	0	0	0	0	0	0	0	0	0	0	0	0	0	0	0	0	0	0	0	0	0
k__Bacteria|p__Firmicutes|c__Clostridia|o__Clostridiales|f__Clostridiales_Family_XI_Incertae_Sedis|g__Finegoldia|s__Finegoldia_magna	0	0	0	0	0	0	0	0	0	0.00192	0	0	0	0	0	0	0	0	0	0	0	0	0	0	0	0	0	0	0	0	0	0	0	0	0	0	0	0	0	0	0	0	0	0	0	0
k__Bacteria|p__Firmicutes|c__Clostridia|o__Clostridiales|f__Clostridiales_Family_XI_Incertae_Sedis|g__Parvimonas|s__Parvimonas_unclassified	0.00458	0	0	0.01593	0	0	0	0	0	0	0	0	0	0	0	0	0	0	0	0	0	0	0	0	0	0	0	0	0	0	0	0	0	0	0	0	0	0	0	0	0	0	0	0	0	0
k__Bacteria|p__Firmicutes|c__Clostridia|o__Clostridiales|f__Clostridiales_Family_XI_Incertae_Sedis|g__Peptoniphilus|s__Peptoniphilus_lacrimalis	0	0	0	0	0	0	0	0	0	0	0	0.02142	0	0	0	0	0	0	0	0	0	0	0	0	0	0	0	0	0	0	0	0	0	0	0	0	0	0	0	0	0	0	0	0	0	0
k__Bacteria|p__Firmicutes|c__Clostridia|o__Clostridiales|f__Clostridiales_Family_XIII_Incertae_Sedis|g__Clostridiales_Family_XIII_Incertae_Sedis_noname|s__Eubacterium_infirmum	0.00132	0	0	0	0	0.00047	0	0	0	0	0	0	0	0.00023	0	0	0	0	0	0	0	0	0	0	0	0	0	0	0	0	0	0	0	0	0	0.00410039	0	0	0	0	0	0.00146201	0	0	0	0.00436016
k__Bacteria|p__Firmicutes|c__Clostridia|o__Clostridiales|f__Clostridiales_noname|g__Clostridiales_noname|s__Clostridiales_bacterium_1_7_47FAA	0	0	0	0.01233	0	0.00663	0.00964	0.0328	0.07764	0	0	0	0	0.00275	0.000240004	0.01079	0.0041014	0	0	0	0	0.06914	0.013878	0	0	0	0	0.0669559	0.0221608	0.114124	0	0	0	0.0332167	0.0110818	0	0	0	0	0	0	0.00316434	0	0	0	0
k__Bacteria|p__Firmicutes|c__Clostridia|o__Clostridiales|f__Clostridiales_noname|g__Clostridiales_noname|s__Clostridiales_genomosp_BVAB3	0	0	0	0	0	0	0	0	0	0.00619	0	0	0	0	0	0	0	0	0	0	0	0	0	0	0	0	0	0	0	0	0	0	0	0	0	0	0	0	0	0	0	0	0	0	0	0
k__Bacteria|p__Firmicutes|c__Clostridia|o__Clostridiales|f__Clostridiales_noname|g__Flavonifractor|s__Flavonifractor_plautii	0.00077	0	0	0	0	0	0.09305	0.02627	0.04748	0	0.00385901	0	0.04547	0.02944	0.000330005	0	0	0	0	0	0.00688175	0	0.0289426	0.0048702	0.08095	0	0.0405033	0.0830921	0.174757	0.0404216	0.0541741	0.283178	0.0416894	1.06568	0.0229338	0.0293628	0.00196	0.00113062	0.00944	0	0	0.121977	0.0163683	0	0	0
k__Bacteria|p__Firmicutes|c__Clostridia|o__Clostridiales|f__Clostridiales_noname|g__Pseudoflavonifractor|s__Pseudoflavonifractor_capillosus	0	0	0	0	0	0	0	0	0	0	0	0	0	0	0	0	0	0	0	0	0	0	0.0011565	0	0	0	0	0	0.000960037	0	0	0	0	0	0	0	0	0	0	0	0	0	0	0	0	0
k__Bacteria|p__Firmicutes|c__Clostridia|o__Clostridiales|f__Eubacteriaceae|g__Anaerofustis|s__Anaerofustis_stercorihominis	0	0	0	0	0	0	0	0	0	0	0	0	0	0	0	0	0	0	0	0	0	0	0	0	0	0	0	0	0	0	0	0	0	0.00647367	0	0	0	0	0	0	0	0	0	0	0	0
k__Bacteria|p__Firmicutes|c__Clostridia|o__Clostridiales|f__Eubacteriaceae|g__Eubacterium|s__Eubacterium_eligens	0	0.00142	0	1.27039	0	0	0	0.0204	0	0	0.791139	0.3395	0.61471	1.07442	0	0	0	0	0.47819	0.20412	0.0691085	0	3.24103	2.38868	0.14348	3.77528	0.246691	0	0	0	0	3.12624	0.931941	0	4.37167	0.0167016	0	0	0.46261	0.134942	5.60421	0	0	0.376483	22.9222	0.00189007
k__Bacteria|p__Firmicutes|c__Clostridia|o__Clostridiales|f__Eubacteriaceae|g__Eubacterium|s__Eubacterium_hallii	0	0.09214	0.01442	0.00158	0	0	0	0	0	0	0.0483398	0.03343	0.01773	0.0281	0	0.10338	0.413321	0.0450107	0.02178	0.576852	0.301844	0.03991	0.04095	0.0260515	0.13637	0.0210534	0.388579	0.0498693	0	0	0	0.202633	0.129752	0.224215	0.023864	0	0.08945	0	0.09887	0.00383203	0.147573	0.0834245	0	0.105503	0.00678136	1.1657
k__Bacteria|p__Firmicutes|c__Clostridia|o__Clostridiales|f__Eubacteriaceae|g__Eubacterium|s__Eubacterium_limosum	0	0	0	0	0	0	0	0.01455	0	0	0	0	0	0	0	0	0	0	0	0	0	0	0	0	0	0	0	0.00926358	0.00234009	0	0	0	0	0	0	0	0	0	0	0	0	0	0	0	0	0
k__Bacteria|p__Firmicutes|c__Clostridia|o__Clostridiales|f__Eubacteriaceae|g__Eubacterium|s__Eubacterium_ramulus	0.00512	0	0	0.01791	0	0	0	0	0	0	0.0527603	0.04676	0.01979	0.06801	0	0.00808	0	0.0738404	0.01235	0.0722978	0.0744855	0	0.0753734	0.0240491	0	0.0282013	0.0448484	0	0.0309512	0.0202208	0	0.186332	0.0389858	0	0	0	0	0	0.04162	0.00366194	0.0498209	0.0138891	0	0.0169738	0.0230324	0.026831
k__Bacteria|p__Firmicutes|c__Clostridia|o__Clostridiales|f__Eubacteriaceae|g__Eubacterium|s__Eubacterium_rectale	0	0.4376	2.86599	0.28298	0	0	0.16319	0.40773	0	0.00152	2.21688	0.04482	0.30742	17.3122	0	1.2421	0.00619211	1.00841	7.35077	0	9.4167	0	0	0.0126384	0	0.00141157	4.54009	0	0	0.00827033	0	4.0034	0.0512776	0.00172699	0	38.2514	10.1682	0	15.5828	2.04803	0.0876416	8.25173	0.000632641	0.610175	0.000919677	13.4689
k__Bacteria|p__Firmicutes|c__Clostridia|o__Clostridiales|f__Eubacteriaceae|g__Eubacterium|s__Eubacterium_siraeum	0	0	0	2.58732	0	0	0	0.99532	0	0	4.68028	0	0	0	0	0	0	0.8939	0.42894	0	3.09839	0	0	0.00456832	0	0	1.82429	0	0	0	0	0.030452	0	0.000363576	3.39673	0	0	0	2.41345	0	0	0	0	0	0	0
k__Bacteria|p__Firmicutes|c__Clostridia|o__Clostridiales|f__Eubacteriaceae|g__Eubacterium|s__Eubacterium_sp_3_1_31	0	0	0	0	0	0	0	0	0	0	0	0	0	0	0	0	0	0	0	0	0	0	0	0	0	0	0	0	0.285141	0	0	0	0	0	0	0	0	0	0	0	0	0	0	0	0	0
k__Bacteria|p__Firmicutes|c__Clostridia|o__Clostridiales|f__Eubacteriaceae|g__Eubacterium|s__Eubacterium_ventriosum	0	0	0	0.0032	0	0	0	0	0	0	0.0134453	0	0.01036	0.11912	0	0.05839	0	0.0925631	0.67549	0.282129	0.00330043	0	0.168557	0.0542061	0.07424	0.368759	0.195476	0.00168065	0	0	0	0.391125	0.00119601	0.000787748	0.495933	0	0.16078	1.30176	0.22862	0.00657349	0.0211704	0.259807	0	0.169738	0	0
k__Bacteria|p__Firmicutes|c__Clostridia|o__Clostridiales|f__Lachnospiraceae|g__Anaerostipes|s__Anaerostipes_caccae	0	0	0	0	0	0	0	0	0	0	0	0	0	0	0	0	0	0	0	0	0	0	0	0	0	0	0	0	0	0	0	0	0	0.00528195	0	0	0	0	0	0	0	0	0	0	0	0
k__Bacteria|p__Firmicutes|c__Clostridia|o__Clostridiales|f__Lachnospiraceae|g__Anaerostipes|s__Anaerostipes_hadrus	0.01573	0.00063	0	0	0	0	0.0023	0.01072	0	0	0.00143947	0.06531	0	0	0	0.01	0.044165	0.00797544	0	0.0328181	0.0354119	0	0.00342926	0	0.00082	0.00177197	0.0077949	0.00920355	0	0	0.0122302	0.0219014	0	0.00847334	0	0.0116611	0.04411	0	0.00199	0	0	0.110902	0	0.0013403	0.374076	0.867983
k__Bacteria|p__Firmicutes|c__Clostridia|o__Clostridiales|f__Lachnospiraceae|g__Anaerostipes|s__Anaerostipes_unclassified	0	0	0	0	0	0	0	0	0.24084	0	0	0	0	0	0	0	0	0	0	0	0	0.50362	0	0	0	0	0	0	0.00399015	0.00824032	0	0	0	0	0	0	0	0	0	0	0	0	0	0	0	0
k__Bacteria|p__Firmicutes|c__Clostridia|o__Clostridiales|f__Lachnospiraceae|g__Blautia|s__Blautia_hansenii	0	0	0	0	0	0	0	0	0	0	0	0	0	0	0	0	0	0	0	0	0	0	0	0	0	0	0	0	0	0.00404016	0	0	0	0	0	0	0	0	0	0	0	0	0	0	0	0
k__Bacteria|p__Firmicutes|c__Clostridia|o__Clostridiales|f__Lachnospiraceae|g__Blautia|s__Blautia_hydrogenotrophica	0	0	0	0	0	0	0	0	0	0	0	0	0	0	0	0	0	0	0	0	0	0	0	0	0	0	0	0	0	0	0	0.31466	0	0	0	0	0	0	0	0	0	0	0	0	0	0
k__Bacteria|p__Firmicutes|c__Clostridia|o__Clostridiales|f__Lachnospiraceae|g__Blautia|s__Blautia_producta	0	0	0	0	0	0	0	0	0	0	0	0	0	0	0	0	0	0	0	0.0069117	0	0.02338	0	0	0	0	0	0	0.00301012	0	0	0	0	0	0	0	0	0	0	0	0	0	0	0	0	0
k__Bacteria|p__Firmicutes|c__Clostridia|o__Clostridiales|f__Lachnospiraceae|g__Blautia|s__Ruminococcus_gnavus	0	0.16377	1.6868	0	32.3917	0.14268	6.91718	0.01674	3.85295	8.94588	0.00268497	0	0	5.4657	2.88817	2.0605	9.02846	0	0	0.871174	0.0209261	1.0072	0.0191476	0	0.30318	0	0.0351927	0.0480385	2.68993	0.299472	2.91329	0.379814	0.0258096	0.247454	0.00176029	0.952841	0	13.728	0	0	2.31435	4.28322	0.344388	0.582749	0.554222	0.368054
k__Bacteria|p__Firmicutes|c__Clostridia|o__Clostridiales|f__Lachnospiraceae|g__Blautia|s__Ruminococcus_obeum	0.02271	0.05739	0	0.04202	0	0	0	0.20739	0	0	0.307915	0.0279	0.18703	0.08709	0	0.14978	0.0327912	0.199936	0.1357	2.79263	0.527427	0.01234	0.687984	0.0626082	0.08403	0.104396	0.476254	0.309139	0.000430016	0.00777031	0.00469851	0.587078	0.10554	0.0508603	0.193072	0.876214	0.25958	0.0285756	0.2863	0.0346184	0.265095	0.563063	0.0151131	0.128268	0.750588	0.221308
k__Bacteria|p__Firmicutes|c__Clostridia|o__Clostridiales|f__Lachnospiraceae|g__Blautia|s__Ruminococcus_torques	0.1739	0.05074	0.87562	0.01167	0.3213	0.03079	0.30906	3.12922	0.14797	0.16149	0.434986	1.77878	0.59571	0.69723	0.0504807	4.94986	0.564312	0.225994	0.2542	1.04372	1.40003	0.11595	0.576126	0.197223	0.65303	0.569272	1.8269	3.93021	2.70923	0.076423	0.0435369	1.66842	0.279856	6.21554	0.274786	1.77524	0.05967	0.96923	0.41411	0.0534484	2.15449	0.456717	0.0525695	0.169257	0.769083	1.08919
k__Bacteria|p__Firmicutes|c__Clostridia|o__Clostridiales|f__Lachnospiraceae|g__Butyrivibrio|s__Butyrivibrio_crossotus	0	0	0	0	0	0	0	0	0	0	25.7339	0	0.00126	0	0	0	0	0	0	0	0	0	0	0	0	0	0	0	0	0	0	0	0	0	0	0	0	0	0	0	0	0	0	0	0	0
k__Bacteria|p__Firmicutes|c__Clostridia|o__Clostridiales|f__Lachnospiraceae|g__Butyrivibrio|s__Butyrivibrio_unclassified	0.00449	0	0	0	0	0	0	0	0	0	0	0	0	0	0	0	0	0	0	0	0	0	0	0	0	0	0	0	0	0	0	0	0	0	0	0	0	0	0	0	0	0	0	0	0	0.00860032
k__Bacteria|p__Firmicutes|c__Clostridia|o__Clostridiales|f__Lachnospiraceae|g__Coprococcus|s__Coprococcus_catus	0	0	0.03082	0.0273	0	0	0	0.1302	0	0	0.129226	0.15112	0.05418	0.03806	0	0	0	0.0397471	0.0185	0.28616	0.194685	0	0.064261	0.0491548	0	0.0481735	0.143728	0	0	0	0	0	0.0883538	0	0	0.0338832	0.00889	0.0661762	0.04898	0.00693368	0.0899716	0	0	0.063314	0.0347254	0.0488118
k__Bacteria|p__Firmicutes|c__Clostridia|o__Clostridiales|f__Lachnospiraceae|g__Coprococcus|s__Coprococcus_comes	0	0.17452	0	0.1426	0	0	0	0.50165	0	0	0.0912687	0.1322	0.06231	0.26248	0	0	0	0.139025	0.29529	0	0.332722	0	0.0369978	0.16613	0	0.145381	0.283735	0	0.0597923	0	0.326083	0.222464	0.576918	0.595144	0.456856	0	0.41005	0	0.62122	0.0820335	0.379767	1.43413	0	0.103873	0.643309	0
k__Bacteria|p__Firmicutes|c__Clostridia|o__Clostridiales|f__Lachnospiraceae|g__Coprococcus|s__Coprococcus_eutactus	0	0	0	2.97549	0	0	0	0	0	0	0	0	0	0	0	0	0	0	0	0	0	0	0	0.455967	0	0	0	0	0	0	0	0	0	0	0	0	0	0	0	0	0	0	0	0	0	0
k__Bacteria|p__Firmicutes|c__Clostridia|o__Clostridiales|f__Lachnospiraceae|g__Coprococcus|s__Coprococcus_sp_ART55_1	0	0	0	0	0	0	0	0	0	0	1.22979	0	0.87679	0	0	0	0	0	0	0	0	0	0	0	0	0	0	0	0	0	0	0	0	0	0	0	2.38389	0	0	0	0	0	0	3.26302	0	0
k__Bacteria|p__Firmicutes|c__Clostridia|o__Clostridiales|f__Lachnospiraceae|g__Dorea|s__Dorea_formicigenerans	0.0213	0	0.08584	0	0	0	0	0.23424	0	0	0.0285444	0.17054	0.05163	0.2011	0	0.57707	0	0.0655647	0.05308	0.833455	0.537409	0.34027	0.228031	0.0648621	0.21338	0.121325	0.629366	0.785483	0	0	0.873167	0.188932	0.125229	0	0.114519	0.282487	0.04035	0.246315	0.5618	0.0374299	0.931627	0.321932	0.0439133	0.114605	0.530078	0.242069
k__Bacteria|p__Firmicutes|c__Clostridia|o__Clostridiales|f__Lachnospiraceae|g__Dorea|s__Dorea_longicatena	0.02085	0	0	0.00481	0	0	0	0.08327	0	0	0.359593	0.05503	0.08455	0.14743	0	0.05277	0.131125	0.140546	0.03051	0.318978	0.167038	0	0.0808441	0.0228718	0.02024	0.0529888	0.325857	0.0903549	0	0	0.138929	0.727287	0.130184	0.0645752	0.0394166	0.130672	0.20923	0	0.09692	0.00529281	0.327976	1.60091	0.173414	0.0791675	0.0291467	0.218528
k__Bacteria|p__Firmicutes|c__Clostridia|o__Clostridiales|f__Lachnospiraceae|g__Dorea|s__Dorea_unclassified	0	0.07329	0	0.14774	0	0	0.00446	0	0	0	0	0	0.01245	0	0	0	0.150181	0	0.18388	0	0	0	0	0	0	0	0	0	0.0164706	0	0	0	0	0.0718164	0	0	0	0	0	0	0	0	0.0372857	0	0	0
k__Bacteria|p__Firmicutes|c__Clostridia|o__Clostridiales|f__Lachnospiraceae|g__Lachnospiraceae_noname|s__Lachnospiraceae_bacterium_1_1_57FAA	0	0	0	0.01513	0	0.00889	0	0.21538	0	0.00315	0.837477	0.03161	0.10104	0.24347	0	0	0.101515	0.0251171	0.03075	1.03265	1.40866	0	0.293147	0.39027	0	0.233059	0.44266	0.093326	0.078843	0	0	0.120788	0	0	0.407818	0.202659	0	2.87687	5.80172	0	0.745443	0.0128977	0.00803354	0.0837285	0	0.0479418
k__Bacteria|p__Firmicutes|c__Clostridia|o__Clostridiales|f__Lachnospiraceae|g__Lachnospiraceae_noname|s__Lachnospiraceae_bacterium_1_4_56FAA	0	0	0	0	0	0	0.17178	0.00024	0	0	0	0.00606	0.01208	0.01658	0	0.15487	0.0178561	0	0	0.0477617	0	0.39861	0	0	0.01185	0	0	0.0174167	0.0566722	0.458318	0.0748334	0.016241	0	0.118354	0.0129722	0	0	0	0	0	0	0.0079409	0.0290413	0	0.0127037	0
k__Bacteria|p__Firmicutes|c__Clostridia|o__Clostridiales|f__Lachnospiraceae|g__Lachnospiraceae_noname|s__Lachnospiraceae_bacterium_2_1_46FAA	0	0	0	0	0	0	1.01644	0	0	0	0	0	0	0	0	0	0	0	0	0	0	0	0	0	0	0	0	0	0	0	0	0	0	0	0	0	0	0	0	0	0	0.0404055	0	0	0	0
k__Bacteria|p__Firmicutes|c__Clostridia|o__Clostridiales|f__Lachnospiraceae|g__Lachnospiraceae_noname|s__Lachnospiraceae_bacterium_2_1_58FAA	0.02404	0.02884	0.94052	0	0	0.018	1.27153	0	0.59454	1.40701	0	0	0	0	0.0179703	0.03252	1.74581	0	0	0.0971039	0	0	0	0	0	0	0.000714114	0.00633244	0.408376	0.0124105	0.374288	0.0230715	0	0.0144017	0	0.234312	0	0	0	0	0.659942	0.0392639	0.0219416	0.129709	0	0.00953036
k__Bacteria|p__Firmicutes|c__Clostridia|o__Clostridiales|f__Lachnospiraceae|g__Lachnospiraceae_noname|s__Lachnospiraceae_bacterium_3_1_46FAA	0	0	0	0.00058	0	0	0	0.08445	0	0	0.179128	0	0.04537	0.06752	0	0.32718	0	0.0467819	0.03279	0.077339	0.0399964	0	0	0.0223888	0	0.00550611	0.023616	0.413059	0.27263	0	0	0	0	0.292032	0	0	0.01206	0.00611335	0.02286	0.00548291	0	0.00774063	0.000451887	0.00475105	0	0
k__Bacteria|p__Firmicutes|c__Clostridia|o__Clostridiales|f__Lachnospiraceae|g__Lachnospiraceae_noname|s__Lachnospiraceae_bacterium_3_1_57FAA_CT1	0	0	0	0	0	0	0	0.00305	0	0.03199	0	0	0	0	0	0.00377	0	0	0	0	0.0166225	0	0	0	0	0	0.058145	0	0.0135605	0	0	0	0	0	0	0	0	0	0	0	0	0	0	0	0	0
k__Bacteria|p__Firmicutes|c__Clostridia|o__Clostridiales|f__Lachnospiraceae|g__Lachnospiraceae_noname|s__Lachnospiraceae_bacterium_4_1_37FAA	0	0	0	0	0	0	0	0	0	0	0	0	0	0	0	0	0	0	0	0	0	0	0	0	0	0	0	0	0	0.00690027	0	0	0	0	0	0	0	0	0	0	0	0	0	0	0	0
k__Bacteria|p__Firmicutes|c__Clostridia|o__Clostridiales|f__Lachnospiraceae|g__Lachnospiraceae_noname|s__Lachnospiraceae_bacterium_5_1_57FAA	0	0.01891	0	0	0	0	0	0	0	0	0	0	0	0	0	0	0	0	0	0	0	0	0	0	0	0	0	0.0276207	0.0171907	0.0172507	0	0.0376924	0	0.0143007	0	0	0	0	0	0	0	0	0	0	0	0
k__Bacteria|p__Firmicutes|c__Clostridia|o__Clostridiales|f__Lachnospiraceae|g__Lachnospiraceae_noname|s__Lachnospiraceae_bacterium_5_1_63FAA	0.01996	0.04621	0	0	0	0	0.06843	0.00297	0	0	0.0214492	0.04367	0.00252	0.00444	0	0.00823	2.64226	0.0452108	0.0015	0.253162	0.0317805	0	0.0508959	0.0151439	0.00741	0.00728809	0.0335332	0.0597031	0	0.0146206	0.213369	0.217404	0.325907	0.109234	0.00940157	4.90229	0.05165	0	0.0408	0	0.00365007	0.0303617	0.00804358	0.00533118	0.0927055	0.192597
k__Bacteria|p__Firmicutes|c__Clostridia|o__Clostridiales|f__Lachnospiraceae|g__Lachnospiraceae_noname|s__Lachnospiraceae_bacterium_6_1_63FAA	0	0	0	0	0	0	0.46156	0	0	0	0	0	0	0.00138	0	0	0	0	0	0	0	0	0	0	0.00104	0	0	0	0	0.0428117	0	0	0	0.0108669	0	0	0	0	0	0	0	0	0.000712977	0	0	0
k__Bacteria|p__Firmicutes|c__Clostridia|o__Clostridiales|f__Lachnospiraceae|g__Lachnospiraceae_noname|s__Lachnospiraceae_bacterium_7_1_58FAA	0	0	0.08571	0.04666	0	0	0.00491	0.06649	0	0	0.0784053	0	0.00675	0.00262	0	0.02004	0	0.0129588	0.01382	0	0.0386923	0	0.0419054	0	0.0477	0	0.0126026	0.0576823	0.0506519	0	0	0.0353523	0.00227141	0.0490929	0	0	0	0	0.00497	0	0	0	0	0	0	0
k__Bacteria|p__Firmicutes|c__Clostridia|o__Clostridiales|f__Lachnospiraceae|g__Lachnospiraceae_noname|s__Lachnospiraceae_bacterium_8_1_57FAA	0	0	0	0.03732	0	0	0.01208	0	0.2888	0.00675	0	0.00866	0	0	0	0	0	0	0	0	0	0	0	0	0	0	0	0	0	0	0.00770314	0	0.0732077	0	0.0194632	0	0	0	0.07511	0	0.0177903	0.345144	0.0210178	0	0.0871773	0
k__Bacteria|p__Firmicutes|c__Clostridia|o__Clostridiales|f__Lachnospiraceae|g__Lachnospiraceae_noname|s__Lachnospiraceae_bacterium_9_1_43BFAA	0	0	0	0	0	0	0.1611	0	0	0	0	0	0	0.00873	0	0.00254	0.00229078	0	0	0	0	0	0	0	0.00434	0	0	0	0	0.0559022	0.0160112	0	0	0.00133311	0	0.00193018	0	0	0	0	0	0	0.00350463	0	0	0
k__Bacteria|p__Firmicutes|c__Clostridia|o__Clostridiales|f__Lachnospiraceae|g__Lachnospiraceae_noname|s__Lachnospiraceae_bacterium_ICM7	0.00205	0	0	0	0	0	0	0	0	0	0	0	0	0	0	0	0	0	0	0	0	0	0	0	0	0	0	0	0	0	0	0	0	0	0	0	0	0	0	0	0	0	0	0	0	0
k__Bacteria|p__Firmicutes|c__Clostridia|o__Clostridiales|f__Lachnospiraceae|g__Oribacterium|s__Oribacterium_sinus	0.00933	0	0	0	0	0	0	0	0	0	0	0	0	0	0	0.00027	0	0	0	0	0	0	0	0	0	0	0	0	0	0	0	0	0	0	0	0	0	0	0	0	0	0.00373513	0	0	0	0
k__Bacteria|p__Firmicutes|c__Clostridia|o__Clostridiales|f__Lachnospiraceae|g__Roseburia|s__Roseburia_hominis	0	0	0	0.19429	0	0	0	0	0	0	0.415855	0	0.23352	1.00855	0	0	0	0	4.37387	0.334782	0.0517135	0	0.913039	0.00801972	0.16548	0.124028	0.345832	2.31223	0.0150706	0	0.192296	0.742558	0.182115	0	0.800494	0.602458	1.26497	0	0.17295	0.00164087	0.0276705	0	0	0.0262958	0	0
k__Bacteria|p__Firmicutes|c__Clostridia|o__Clostridiales|f__Lachnospiraceae|g__Roseburia|s__Roseburia_intestinalis	0	0	0	0.06483	0	0	0	35.7076	5.374	0	0.671397	0	0.27321	0.01193	0	6.27146	0	0	0	4.89334	0	1.31867	0.918972	0.0844436	0	0.547027	0.159941	0.253198	0	3.55306	0	0.240565	0	7.07777	1.97083	9.53162	0.79271	2.8634	2.89538	0	0	25.784	0	0.171078	0.0358977	7.79973
k__Bacteria|p__Firmicutes|c__Clostridia|o__Clostridiales|f__Lachnospiraceae|g__Roseburia|s__Roseburia_inulinivorans	0	0	0	0.00827	0	0	0.89008	1.65387	0	0	0.183875	0.09517	3.31323	5.9616	0	0	0.00248084	0.0743007	1.29251	0.956475	0.0456142	2.38399	2.07782	0.931304	0.87977	1.61282	2.50639	1.50429	0.0159606	1.60535	0	1.02924	1.87311	0	0.705328	0	0.47481	6.96972	3.7362	0.214554	1.44136	0	0	2.34898	0	3.26469
k__Bacteria|p__Firmicutes|c__Clostridia|o__Clostridiales|f__Lachnospiraceae|g__Roseburia|s__Roseburia_unclassified	0.35925	0.05087	0	0	0	0	0	0	0	0	0	0	0	0	0	1.20264	0.0654423	0.202368	0	0	0.0372176	0	0	0	0	0	0	0	0	0.170597	0	0	0	0.552111	0	0.958502	0	0	0	0.0900078	0	0	0.00341425	0	0.151757	0
k__Bacteria|p__Firmicutes|c__Clostridia|o__Clostridiales|f__Lachnospiraceae|g__Stomatobaculum|s__Stomatobaculum_longum	0	0	0	0	0.0012	0	0	0	0	0	0	0	0	0	0	0	0	0	0	0	0	0	0	0	0	0	0	0	0	0	0	0	0	0	0	0	0	0	0	0	0	0	0	0	0	0
k__Bacteria|p__Firmicutes|c__Clostridia|o__Clostridiales|f__Oscillospiraceae|g__Oscillibacter|s__Oscillibacter_sp_KLE_1745	0	0	0	0	0	0	0	0	0	0	0	0	0.21317	0	0	0	0	0	0	0	0.594389	0	0	0	0	0	0	0	0	0	0	0.509653	0	0	0.430202	0	0	0	0	0	0	0	0	0	0	0
k__Bacteria|p__Firmicutes|c__Clostridia|o__Clostridiales|f__Oscillospiraceae|g__Oscillibacter|s__Oscillibacter_unclassified	0	0.36074	0.48608	0.14841	0	0	0.2086	1.5416	0	0	0.176453	0	0.12549	0.23428	0.172413	0.33256	0	0.11691	0.32999	0.20132	1.12241	0.4814	0.15659	0.0981284	0.43711	0.101122	0.787617	1.37856	0.314032	0	0	0.532064	0.496564	0.528892	0.12122	0.0789675	0.58384	0	0.0639	0	0.0866016	0	0	0.0124327	0.00663987	0.0220608
k__Bacteria|p__Firmicutes|c__Clostridia|o__Clostridiales|f__Peptostreptococcaceae|g__Peptostreptococcaceae_noname|s__Clostridium_bartlettii	0	0	0	0	0.00032	0	0	0	0.16316	0.11198	0	0	0.00882	0	0	0.01355	0	0	0	0	0	0	0	0	0	0	0.00102591	0.0121447	0	0.000270011	0.00915504	0.125718	0	0.0797646	0	0.0294028	0.09113	0	0.00849	0	0	0.016002	0	0.00824182	0.0483386	1.39331
k__Bacteria|p__Firmicutes|c__Clostridia|o__Clostridiales|f__Peptostreptococcaceae|g__Peptostreptococcaceae_noname|s__Clostridium_difficile	0	0	0	0	0	0.00051	0	0	0	0.02353	0	0	0	0	0	0	0	0	0	0	0	0.0006	0	0	0	0	0	0	0	0	0	0	0	0	0	0	0	0	0	0	0	0	0	0	0	0
k__Bacteria|p__Firmicutes|c__Clostridia|o__Clostridiales|f__Peptostreptococcaceae|g__Peptostreptococcaceae_noname|s__Clostridium_hiranonis	0	0	0	0	0	0	0	0	0	0	0	0	0	0	0	0	0	0	0	0	0	0	0	0	0	0	0.0969988	0	0	0	0	0	0	0	0	0	0	0	0	0	0	0	0	0	0	0
k__Bacteria|p__Firmicutes|c__Clostridia|o__Clostridiales|f__Peptostreptococcaceae|g__Peptostreptococcaceae_noname|s__Clostridium_sordellii	0	0	0	0	0	0	0	0	0	0	0	0	0	0	0	0	0	0	0	0	0	0	0	0	0	0	0	0	0	0	0	0	0	0	0	0	0	0.0147981	0	0	0	0	0	0	0	0
k__Bacteria|p__Firmicutes|c__Clostridia|o__Clostridiales|f__Peptostreptococcaceae|g__Peptostreptococcaceae_noname|s__Peptostreptococcaceae_noname_unclassified	0	0	0	0	0	0	0.05294	0	0	0	0.0437967	0	0	0.05093	0	0.22505	0.191125	0	0	0.36723	0.0294631	0	0	0	0.0159	0.0243771	0	0	0	0	0	0	0	0	0.0426571	0.776114	0	0.0711789	0.03265	0.0497764	2.90438	1.25338	0.0489644	0.0267959	1.28877	0.888183
k__Bacteria|p__Firmicutes|c__Clostridia|o__Clostridiales|f__Peptostreptococcaceae|g__Peptostreptococcus|s__Peptostreptococcus_anaerobius	0	0	0	0	0	0	0	0	0	0.00534	0	0	0	0	0	0	0	0	0	0	0	0	0	0	0	0	0	0	0	0	0	0	0	0	0	0	0	0	0	0	0	0	0	0	0	0
k__Bacteria|p__Firmicutes|c__Clostridia|o__Clostridiales|f__Peptostreptococcaceae|g__Peptostreptococcus|s__Peptostreptococcus_stomatis	0.00398	0	0	0.00133	0	0	0	0	0	0	0	0	0	0	0	0	0	0	0	0	0	0	0	0	0	0	0	0	0	0	0	0	0	0	0	0	0	0	0	0	0	0.00245337	0	0	0.00266807	0.00387015
k__Bacteria|p__Firmicutes|c__Clostridia|o__Clostridiales|f__Peptostreptococcaceae|g__Peptostreptococcus|s__Peptostreptococcus_unclassified	0.00362	0	0	0.00635	0	0.00751	0	0	0	0	0	0	0	0	0	0	0	0	0	0.00347085	0	0	0	0	0	0	0	0	0	0	0	0	0	0	0	0.0020902	0	0	0	0	0	0.0178345	0	0	0.00900475	0.00160006
k__Bacteria|p__Firmicutes|c__Clostridia|o__Clostridiales|f__Ruminococcaceae|g__Anaerotruncus|s__Anaerotruncus_colihominis	0	0	0	0.01244	0	0	0.03664	0	0	0.01256	0	0	0.10702	0.01324	0	0.00375	0	0.0652245	0	0	0.0323021	0	0.0332367	0	0	0	0.0761084	0.205319	0.0333513	0	0	0.0423727	0.00932685	0	0.00322054	0	0	0	0.00582	0	0	0	0	0	0	0
k__Bacteria|p__Firmicutes|c__Clostridia|o__Clostridiales|f__Ruminococcaceae|g__Anaerotruncus|s__Anaerotruncus_unclassified	0	0	0	0.04397	0	0	0.02067	0.01915	0	0.01423	0	0	0	0	0	0	0	0.0730598	0	0	0.0288311	0	0.0133349	0	0.01524	0	0.0478054	0.0500793	0	0	0	0.0274318	0.0351164	0	0.0379963	0	0	0	0.00956	0	0.0149403	0	0	0	0	0
k__Bacteria|p__Firmicutes|c__Clostridia|o__Clostridiales|f__Ruminococcaceae|g__Faecalibacterium|s__Faecalibacterium_prausnitzii	0.49224	18.8736	0.01879	6.60844	0	0.35646	0.02307	6.51989	0.00334	1.52419	22.3193	3.33981	3.71677	3.88964	0.524998	9.26689	3.5041	2.18532	3.8801	11.0295	6.0591	0	2.22703	0.723848	11.3754	2.32475	4.54688	0.774189	0.0825432	0.0134305	1.52554	3.12744	5.54646	4.628	14.5283	1.64271	0.34388	0	14.5405	2.28919	12.7761	23.3464	5.63708	6.0413	30.6505	14.963
k__Bacteria|p__Firmicutes|c__Clostridia|o__Clostridiales|f__Ruminococcaceae|g__Ruminococcaceae_noname|s__Ruminococcaceae_bacterium_D16	0	0.00057	0	0	0	0	0	0.00319	0	0	0	0	0	0	0	0	0	0	0	0	0	0	0.0735531	0	0	0	0	0.0571521	0	0	0	0.579227	0	0.000777649	0	0	0	0	0.00547	0	0	0.0517911	0	0	0	0
k__Bacteria|p__Firmicutes|c__Clostridia|o__Clostridiales|f__Ruminococcaceae|g__Ruminococcus|s__Ruminococcus_albus	0	0.00072	0	0	0	0	0	0	0	0	0	0	0	0	0	0	0	0	0	0	0.00168533	0	0	0	0	0	0	0.00693268	0	0	0	0	0	0	0	0	0	0	0.00086	0	0	0	0	0	0	0
k__Bacteria|p__Firmicutes|c__Clostridia|o__Clostridiales|f__Ruminococcaceae|g__Ruminococcus|s__Ruminococcus_bromii	0	0	0	0	0	0	0	2.46229	2.1454	0	2.79453	0	0.43348	0.00444	0	0	0.00252086	0.521736	0	6.37593	0.00117371	2.73571	0	0.73869	6.95811	0.636026	0.147057	2.60611	0	0	0	10.2073	10.1317	0	3.02133	0.469065	6.08237	0	2.98008	0.0268142	0.376777	0	0	0.0627339	0	0.594662
k__Bacteria|p__Firmicutes|c__Clostridia|o__Clostridiales|f__Ruminococcaceae|g__Ruminococcus|s__Ruminococcus_callidus	0	0	0	0	0	0	0	0.02182	0	0	1.10416	0	0.01195	0.27383	0	0.17211	0	0	0.03345	0.118689	0	0	0	0.0800463	0	0	0.0778988	0.00859332	0	0	0	0.0660142	2.35591	0	0.390805	0	0.0053	0	0.01721	0.110749	0.195163	0	0	0.403009	0	0
k__Bacteria|p__Firmicutes|c__Clostridia|o__Clostridiales|f__Ruminococcaceae|g__Ruminococcus|s__Ruminococcus_flavefaciens	0	0	0	0	0	0	0	0	0	0	0	0	0	0	0	0	0	0	0	0	0.0159404	0	0	0	0	0	0	0	0	0	0	0	0	0	0	0	0	0	0	0	0	0	0	0	0	0
k__Bacteria|p__Firmicutes|c__Clostridia|o__Clostridiales|f__Ruminococcaceae|g__Ruminococcus|s__Ruminococcus_lactaris	0	0	0	0	0	0	0	0.34213	0	0	0.645588	0.12344	0	0	0	0	0	0.531483	0.14512	1.74627	0	0	0.845037	0.153522	0	0.694831	1.63883	0	0	0	0	0.00267017	0	0	0.708788	0	0.0191	0	0.82884	0.069767	3.54964	0	0	0.332303	0	0
k__Bacteria|p__Firmicutes|c__Clostridia|o__Clostridiales|f__Ruminococcaceae|g__Ruminococcus|s__Ruminococcus_sp_5_1_39BFAA	0	0	0	0	0	0	0	0.30341	0	0	0	0	0	0.40459	0	0	0	0	0	1.25273	0	1.09458	0	0	0	0	0.542938	0	0	0	0	6.33624	0	0.679807	0	0	0	0	0	0	0.383937	0	0	0	1.79675	0
k__Bacteria|p__Firmicutes|c__Clostridia|o__Clostridiales|f__Ruminococcaceae|g__Subdoligranulum|s__Subdoligranulum_sp_4_3_54A2FAA	0	0	0	0	0	0	0	0	0	0	0	0	0	0	0	0	0	0	0	0	0	0	0	0	0	0	0	0	0	0	0	0.321501	0	0	0	0	0	0	0	0	0	0	0	0	0	0
k__Bacteria|p__Firmicutes|c__Clostridia|o__Clostridiales|f__Ruminococcaceae|g__Subdoligranulum|s__Subdoligranulum_unclassified	0.49888	0.12203	0.38274	0.58636	0	0	0.10843	3.60467	0.04942	0	5.95891	0.30846	7.54609	1.46367	0.155652	0.58111	0.00527179	3.94846	0.51726	0.144806	2.05583	0.25024	2.299	0.78543	0.53296	1.05914	1.25872	0.547711	1.24476	2.07067	0.102903	0.900448	0.491147	4.32724	1.92743	0.0052605	2.17083	0.0426934	0.81714	0.210091	0.372637	0.227983	0.113454	0.469654	1.40493	3.88008
k__Bacteria|p__Firmicutes|c__Clostridia|o__Clostridiales|f__Ruminococcaceae|g__Subdoligranulum|s__Subdoligranulum_variabile	0	0	0	0	0	0	0	0	0	0	0	0	0	0	0	0	0	0	0	0	0	0	0	0	0	0	0	0	0	0	0	0.00131008	0	0	0	0	0	0	0	0	0	0	0	0	0	0
k__Bacteria|p__Firmicutes|c__Erysipelotrichia|o__Erysipelotrichales|f__Erysipelotrichaceae|g__Catenibacterium|s__Catenibacterium_mitsuokai	0	0	0	0	0	0	0	0	0	0	0.159588	0	0	0	0	1.21259	0	0	0	0	1.33101	0	0	0.161038	0	0	0	0	0	0	0	0	0	0	0	0	0	0	0	0	0	0	0	0	0	0
k__Bacteria|p__Firmicutes|c__Erysipelotrichia|o__Erysipelotrichales|f__Erysipelotrichaceae|g__Coprobacillus|s__Coprobacillus_sp_29_1	0	0	0	0	0	0	0	0	0	0	0	0	0	0	0	0	0	0	0	0	0	0	0	0	0	0	0	0	0	0	0	0	0	0.501412	0	0	0	0	0	0	0	0	0	0	0	0
k__Bacteria|p__Firmicutes|c__Erysipelotrichia|o__Erysipelotrichales|f__Erysipelotrichaceae|g__Coprobacillus|s__Coprobacillus_unclassified	0	0.17773	0	0.0029	0	0	0.07899	0.02218	0	0.0644	0	0.00973	0	0.00532	0.0126402	0	0.0362023	0	0	0	0	0.13739	0	0.0363252	0.00508	0	0	0.00574222	0.0626224	0.191198	0.1439	0.139779	0.00100505	0	0	0	0	0.0906896	0	0	0	0	0.00663771	0	0	0
k__Bacteria|p__Firmicutes|c__Erysipelotrichia|o__Erysipelotrichales|f__Erysipelotrichaceae|g__Erysipelotrichaceae_noname|s__Clostridium_innocuum	0	0	0	0	0	0	0	0	0.00491	0	0	0	0	0	0	0	0	0	0	0	0.00800531	0	0.00322813	0	0	0	0	0	0.00415016	0	0	0	0	0.000858444	0	0	0	0	0	0	0	0	0	0	0	0
k__Bacteria|p__Firmicutes|c__Erysipelotrichia|o__Erysipelotrichales|f__Erysipelotrichaceae|g__Erysipelotrichaceae_noname|s__Clostridium_ramosum	0	0.02428	0	0	0	0	0.01084	0.00034	0	0.01108	0	0	0	0	0	0	0.00660225	0	0	0	0	0.0909	0	0	0	0	0	0	0.0994138	0.0581623	0.0704474	0.0404326	0	0	0	0	0	0.00766419	0	0	0	0	0.000984109	0	0	0
k__Bacteria|p__Firmicutes|c__Erysipelotrichia|o__Erysipelotrichales|f__Erysipelotrichaceae|g__Erysipelotrichaceae_noname|s__Clostridium_spiroforme	0	0	0	0	0	0	0	0	0.36879	0	0	0	0	0	0	0	0	0	0	0	0	0	0	0	0	0	0	0	0	0	0	0	0	0	0	0	0	0	0	0	0	0	0	0	0	0
k__Bacteria|p__Firmicutes|c__Erysipelotrichia|o__Erysipelotrichales|f__Erysipelotrichaceae|g__Erysipelotrichaceae_noname|s__Erysipelotrichaceae_bacterium_2_2_44A	0	0.00336	0	0	0	0	0	0	0	0	0	0	0	0	0	0	0	0	0	0	0	0	0	0	0	0	0	0	0.00141005	0	0	0	0	0	0	0	0	0	0	0	0	0	0	0	0	0
k__Bacteria|p__Firmicutes|c__Erysipelotrichia|o__Erysipelotrichales|f__Erysipelotrichaceae|g__Erysipelotrichaceae_noname|s__Erysipelotrichaceae_bacterium_3_1_53	0	0.00247	0	0	0	0	0	0	0	0	0	0	0	0	0	0	0	0	0	0	0	0	0	0	0	0	0	0	0	0	0	0	0	0	0	0	0	0.0126469	0	0	0	0	0.0159265	0	0	0
k__Bacteria|p__Firmicutes|c__Erysipelotrichia|o__Erysipelotrichales|f__Erysipelotrichaceae|g__Erysipelotrichaceae_noname|s__Erysipelotrichaceae_bacterium_5_2_54FAA	0	0	0	0	0	0	0	0	0	0	0	0	0	0	0	0	0	0	0	0	0	0	0	0	0	0	0	0	0.0360614	0	0	0	0	0	0	0	0	0	0	0	0	0	0	0	0	0
k__Bacteria|p__Firmicutes|c__Erysipelotrichia|o__Erysipelotrichales|f__Erysipelotrichaceae|g__Erysipelotrichaceae_noname|s__Erysipelotrichaceae_bacterium_6_1_45	0	0	0.00036	0	0	0	0.00165	0	0.20814	0	0	0	0	0	0	0	0	0	0	0	0	0	0	0	0	0	0.00632645	0.00469181	0	0	0	0	0	0.014129	0	0	0	0	0	0	0	0.0238027	0	0	0	0
k__Bacteria|p__Firmicutes|c__Erysipelotrichia|o__Erysipelotrichales|f__Erysipelotrichaceae|g__Erysipelotrichaceae_noname|s__Eubacterium_biforme	0	0	0	0	0	0	0.28173	0	0	0	0	0	0.15472	0	0	0	0	0	0	0	3.26939	0	0	0.796599	0	0.082822	1.99932	0	0	0	0	0	0	0	0	0	0.87635	2.04218	0.08767	0	0.884346	0	0	0.475425	0	0
k__Bacteria|p__Firmicutes|c__Erysipelotrichia|o__Erysipelotrichales|f__Erysipelotrichaceae|g__Erysipelotrichaceae_noname|s__Eubacterium_cylindroides	0	0	0	0	0	0	0	0.00847	0	0	0	0	0	0	0	0	0	0	0	0	0	0	0	0	0	0	0	0	0	0	0	0	0	0	0.0030005	0	0	0	0	0	0	0	0	0	0	0
k__Bacteria|p__Firmicutes|c__Erysipelotrichia|o__Erysipelotrichales|f__Erysipelotrichaceae|g__Erysipelotrichaceae_noname|s__Eubacterium_dolichum	0	0	0	0	0	0	0.02466	0	0.0029	0	0	0	0	0.16499	0	0.00614	0	0	0	0	0	0.03753	0	0	0	0	0	0.00875338	0	0	0	0	0	0.0131291	0	0	0	0	0	0	0	0	0	0	0	0
k__Bacteria|p__Firmicutes|c__Erysipelotrichia|o__Erysipelotrichales|f__Erysipelotrichaceae|g__Holdemania|s__Holdemania_filiformis	0	0	0	0	0	0	0	0	0	0	0.0351395	0	0	0.02055	0	0	0	0	0	0.0850009	0.0297741	0.07602	0.137211	0	0.09482	0	0.0052603	0.178799	0	0	0	0.15849	0	0	0.0467878	0.00947091	0	0	0.03273	0	0.00351006	0.00548753	0	0.017984	0	0.00941035
k__Bacteria|p__Firmicutes|c__Erysipelotrichia|o__Erysipelotrichales|f__Erysipelotrichaceae|g__Holdemania|s__Holdemania_sp_AP2	0	0	0	0	0	0	0	0	0	0	0	0	0	0	0	0	0	0	0	0	0	0	0	0	0	0	0	0	0	0	0	0	0	0.241657	0	0	0	0	0	0	0	0	0	0	0	0
k__Bacteria|p__Firmicutes|c__Erysipelotrichia|o__Erysipelotrichales|f__Erysipelotrichaceae|g__Holdemania|s__Holdemania_unclassified	0	0	0	0	0	0	0	0.03309	0	0	0	0	0.02407	0	0	0.04566	0	0	0.03288	0	0	0	0	0	0	0.00440489	0.0284338	0	0.0124105	0	0	0	0.0194376	0	0.0112319	0.00693066	0.05924	0	0.00593	0	0.00458008	0	0	0	0	0
k__Bacteria|p__Firmicutes|c__Erysipelotrichia|o__Erysipelotrichales|f__Erysipelotrichaceae|g__Solobacterium|s__Solobacterium_moorei	0.01385	0.01223	0.00185	0	0.00031	0.00443	0	0.00047	0	0.00355	0	0.00311	0	0.0188	0	0.02735	0.00486165	0	0	0.0501823	0	0	0	0	0.00126	0	0	0	0	0.000240009	0	0	0	0	0	0.0461444	0	0	0	0	0.00183003	0.0173939	0	0	0.011218	0.00696026
k__Bacteria|p__Firmicutes|c__Erysipelotrichia|o__Erysipelotrichales|f__Erysipelotrichaceae|g__Turicibacter|s__Turicibacter_sanguinis	0	0	0	0	0	0	0	0	0	0	0.129226	0	0	0	0	0	0	0	0	0	0	0	0	0	0	0	0	0	0	0	0	0	0	0	0	0.00094009	0	0	0	0	0	0	0	0	0.0687029	0
k__Bacteria|p__Firmicutes|c__Erysipelotrichia|o__Erysipelotrichales|f__Erysipelotrichaceae|g__Turicibacter|s__Turicibacter_unclassified	0	0	0	0	0	0	0	0	0	0	0.117179	0	0	0	0	0	0	0	0	0	0	0	0	0	0	0	0	0	0	0	0	0	0	0	0	0	0	0	0	0	0	0	0	0	0.420788	0
k__Bacteria|p__Firmicutes|c__Negativicutes|o__Selenomonadales|f__Acidaminococcaceae|g__Acidaminococcus|s__Acidaminococcus_fermentans	0	0	0	0	0	0	0	0	0	0	0	0	0	0	0	0	0	0	0	0	0	0	0	0	0	0	0	0.116815	0	0	0	0	0	0	0	0	0	0.00519284	0	0	0	0	0	0	0	0
k__Bacteria|p__Firmicutes|c__Negativicutes|o__Selenomonadales|f__Acidaminococcaceae|g__Acidaminococcus|s__Acidaminococcus_intestini	0	0	0	0	0	0	0	0	0	0	0	0	0	0	0	0.00132	0	0	0	0.00393097	0	0	0.00465615	0	0	0	0	0.10358	0	0.000530021	0	0	0	0.0138664	0	0	0	0.014608	0	0	0.00353006	0	0	0	0	0
k__Bacteria|p__Firmicutes|c__Negativicutes|o__Selenomonadales|f__Acidaminococcaceae|g__Acidaminococcus|s__Acidaminococcus_unclassified	0	0	0	0	0	0	0	0	0	0	0	0	0	0	0	0	0	0	0	0	0	0	0	0	0	0	0	0	0	0	8.48106	0	0	0	0.0267745	0	0	0	0	0	0	0	0	0	0	0
k__Bacteria|p__Firmicutes|c__Negativicutes|o__Selenomonadales|f__Acidaminococcaceae|g__Phascolarctobacterium|s__Phascolarctobacterium_succinatutens	0	0	0	0	0	0	0	2.61547	0	0	0	8.46272	0	0	0	0	0	0	0	0	0	0	0	0	0	0.0112024	0	0	0	0	0	0	0	0	0	0	0	0	0	0	0	0	0	0	0	0
k__Bacteria|p__Firmicutes|c__Negativicutes|o__Selenomonadales|f__Veillonellaceae|g__Dialister|s__Dialister_invisus	0	0	0	7.58788	0	0	0	0	0	0	0	0	0	0	0	0.04929	0	0	0	0	0	0	0	0.0355202	0	0	0	0	0	0	0	0	0	0	0	0.00413039	0	0	0	0	0	0	0	0	0	0
k__Bacteria|p__Firmicutes|c__Negativicutes|o__Selenomonadales|f__Veillonellaceae|g__Dialister|s__Dialister_succinatiphilus	0	0	0	0	0	0	0	0	0	0	0.482989	0	0	0	0	0	0	0	0	0	0	0	0	0	0	0	10.3373	0.0147857	0	0	0	0	0	0	0	0	0	0	0	0	0	0	0	0	0.012542	0
k__Bacteria|p__Firmicutes|c__Negativicutes|o__Selenomonadales|f__Veillonellaceae|g__Megamonas|s__Megamonas_funiformis	0.8804	0	0.198	0.03178	0	0.18459	0	0	0	0	0	0	0	0	0	0	0	0	0.1878	0.192107	0	0	0.597567	0.365446	0.25403	0.0255884	0	0	0	0	0	0	0.0518806	0	0.041747	0	0	0	0	0.137883	0	0	0	0	0	0
k__Bacteria|p__Firmicutes|c__Negativicutes|o__Selenomonadales|f__Veillonellaceae|g__Megamonas|s__Megamonas_hypermegale	4.48176	0	0.08134	1.60028	0	0.08402	0	0	0	0	0	0	0	0	0	0	0	0	1.15502	2.34705	0	0	3.2474	0.113152	0.04457	0.209232	0.221064	0	0	0	0	0.124398	1.48364	0	0.0145524	0	0	0	0	0.426696	0	0	0	0.258987	0	0
k__Bacteria|p__Firmicutes|c__Negativicutes|o__Selenomonadales|f__Veillonellaceae|g__Megamonas|s__Megamonas_rupellensis	0.08763	0	0	0.24233	0	0.01065	0	0	0	0	0	0	0	0	0	0	0	0	0	0.479908	0	0	1.18857	0	0.85984	0.424331	0.730921	0	0	0	0	13.3462	0.745123	0	0.129292	0	0	0	0	0	0	0	0	1.00314	0	0
k__Bacteria|p__Firmicutes|c__Negativicutes|o__Selenomonadales|f__Veillonellaceae|g__Megamonas|s__Megamonas_unclassified	11.5244	0	0.69794	4.5491	0	1.05244	0	0	0.00105	0	0	0	0	0	0	0	0	0	2.30683	6.94168	0	0	16.6967	0.947112	1.85737	1.07905	1.99957	0	0	0	0	13.2626	4.63667	0	0.930525	0	0	0	0	0.839365	0	0	0	3.81477	0	0
k__Bacteria|p__Firmicutes|c__Negativicutes|o__Selenomonadales|f__Veillonellaceae|g__Megasphaera|s__Megasphaera_elsdenii	0	0	0	0	0	0	0	0	0	0	0	0	0	0	0	0	0.000900306	0	0	0	0	0	0	0	0	0.263302	0	0	0	0	0	0	0	0	0	0	0	0	0	0	0	0	0	0	0	0
k__Bacteria|p__Firmicutes|c__Negativicutes|o__Selenomonadales|f__Veillonellaceae|g__Megasphaera|s__Megasphaera_micronuciformis	0	0	0	0	0	0.00575	0	0	0	0	0	0	0	0	0.0139302	0.04015	0	0	0	0.00101025	0	0	0	0	0	0	0	0	0.0144106	0	0	0	0	0	0	0.00757072	0	1.26702	0	0	0	0	0	0	0	0
k__Bacteria|p__Firmicutes|c__Negativicutes|o__Selenomonadales|f__Veillonellaceae|g__Megasphaera|s__Megasphaera_unclassified	0	1.58013	0	0	0	0	0.55205	0	0	0	0	0	0.01842	0	0	0	18.4872	0	0	0.0278469	0.0625678	0	0.132896	0	0	0.497452	0	2.86972	0	0	0.0240774	0	0	0.593922	0	0	0	0	0	0	0.55396	0	0	0.0940608	0.0638013	0
k__Bacteria|p__Firmicutes|c__Negativicutes|o__Selenomonadales|f__Veillonellaceae|g__Mitsuokella|s__Mitsuokella_multacida	0	0	0	0	0	0	0	0	0	0	0	0	0	0	0	0	0	0	0	0	0	0	0	0	0	0	0	0.150498	0	0	0	0	0	0	0	1.05564	0	0.00793434	0	0	0.0161103	0	0	0	0	0
k__Bacteria|p__Firmicutes|c__Negativicutes|o__Selenomonadales|f__Veillonellaceae|g__Mitsuokella|s__Mitsuokella_unclassified	0	0	0	0	0	0	0	0	0	0	0.00745259	0	0	0	0	0	0.0108437	0	0	0.0220654	0	0	0	0	0	0	0	0.228448	0	0	0	0	0	0	0	0.178747	0	0.167732	0	0	0.192983	0	0	0	0.0121984	0
k__Bacteria|p__Firmicutes|c__Negativicutes|o__Selenomonadales|f__Veillonellaceae|g__Veillonella|s__Veillonella_atypica	0	0	0	0	0.03588	0	0	0	0.00104	0.01938	0	0.02962	0	0	0.00780011	0.24451	0.231089	0	0	0.0598747	0	0.05791	0	0.139545	0.00181	0	0	0	0	0	0	0	0	0	0	0.116801	0	0.693509	0.05738	0	0.0183503	0.018195	0	0	0	0
k__Bacteria|p__Firmicutes|c__Negativicutes|o__Selenomonadales|f__Veillonellaceae|g__Veillonella|s__Veillonella_dispar	0.00111	0	0	0	0.31688	0	0	0	0	0.00865	0	0	0	0	0.00983014	0.00149	0.0142048	0	0	0.0138334	0	0.00633	0	0.328275	0.00041	0	0	0	0	0	0	0	0	0	0	0.0435242	0	0.0962327	0.00067	0	0	0	0	0	0.000808508	0
k__Bacteria|p__Firmicutes|c__Negativicutes|o__Selenomonadales|f__Veillonellaceae|g__Veillonella|s__Veillonella_parvula	0.0109	0	0	0	0.14463	0	0.00769	0	0.01134	0.17396	0	0.05181	0.00248	0.00218	0.00422006	1.00792	0.0633015	0	0	0.0179044	0	0.03039	0.0163921	0.45323	0.05423	0	0	0.000870336	0.00283011	0.00987039	0.0506855	0.00166011	0.00684438	0	0.0408168	0.189238	0	3.47056	0.16991	0.0137473	0.0404807	0.623065	0.00322346	0.0330773	0.271972	0.158636
k__Bacteria|p__Firmicutes|c__Negativicutes|o__Selenomonadales|f__Veillonellaceae|g__Veillonella|s__Veillonella_unclassified	0.04267	0.00073	0	0	4.5739	0.00956	0.00804	0.0041	0.0102	0.57029	0.00217452	0.02553	0.00831	0.00932	0.0462007	1.73677	0.165116	0	0	0.0305875	0.00276875	0.03166	0.00607412	2.72537	0.18957	0	0.00831792	0.00606234	0.0146806	0.00553022	0.032204	0.00697045	0.0160908	0	0.0339657	0.0787575	0.00416	6.92774	0.31742	0.00816433	0.0757214	0.739225	0.0053423	0.0346877	0.302058	0.053642
k__Bacteria|p__Fusobacteria|c__Fusobacteriia|o__Fusobacteriales|f__Fusobacteriaceae|g__Fusobacterium|s__Fusobacterium_mortiferum	0	0	0.00932	0	0	0	17.7232	0	0	0	0	0	0	0	0	0	0	0	0	2.25908	0	2.06454	0	0	2.25612	0	0.516194	0	0.0025401	0	0	0	0	0	0	0	0	0	0	0	0	0	0.165451	0	0	0
k__Bacteria|p__Fusobacteria|c__Fusobacteriia|o__Fusobacteriales|f__Fusobacteriaceae|g__Fusobacterium|s__Fusobacterium_nucleatum	0	0	0	0	0	0	0	0	0	0	0	0	0	0.00769	0	0	0	0	0	0	0	0	0	0	0	0	0	0	0	0	0	0	0	0	0	0	0	0	0	0	0	0	0	0	0.00645795	0
k__Bacteria|p__Fusobacteria|c__Fusobacteriia|o__Fusobacteriales|f__Fusobacteriaceae|g__Fusobacterium|s__Fusobacterium_periodonticum	0.0075	0	0	0	0	0	0	0	0	0	0	0	0	0	0	0	0	0	0	0	0	0	0	0	0	0	0	0	0	0	0	0	0	0	0	0	0	0	0	0	0	0	0	0	0	0
k__Bacteria|p__Fusobacteria|c__Fusobacteriia|o__Fusobacteriales|f__Fusobacteriaceae|g__Fusobacterium|s__Fusobacterium_ulcerans	0	0	0	0	0	0	0	0	0	0	0	0	0	0	0	0	0	0	0	0	0	0	0	0	0	0	0	0	0.0485119	0	0	0	0	0	0	0	0	0	0	0	0	0	0	0	0	0
k__Bacteria|p__Fusobacteria|c__Fusobacteriia|o__Fusobacteriales|f__Fusobacteriaceae|g__Fusobacterium|s__Fusobacterium_varium	0	0	0	0	0	0	0	0	0	0	0	0	0	0	0	0	0	0	0	0.0187846	0	0.01438	0	0	0	0	0	0	1.45743	0	0	0	0	0.0121394	0	0	0	0.0103457	0	0	0	0	0	0	0	0
k__Bacteria|p__Proteobacteria|c__Alphaproteobacteria|o__Caulobacterales|f__Caulobacteraceae|g__Brevundimonas|s__Brevundimonas_unclassified	0	0	0	0	0	0	0.0052	0	0	0	0	0	0	0	0	0	0	0	0	0	0	0	0	0	0	0	0	0	0	0	0	0	0	0	0	0	0	0	0	0	0	0	0	0	0	0
k__Bacteria|p__Proteobacteria|c__Alphaproteobacteria|o__Rhodobacterales|f__Rhodobacteraceae|g__Paracoccus|s__Paracoccus_denitrificans	0	0	0	0	0	0	0.00558	0	0	0	0	0	0	0	0	0	0	0	0	0	0	0	0	0	0	0	0	0	0	0	0	0	0	0	0	0	0	0	0	0	0	0	0	0	0	0
k__Bacteria|p__Proteobacteria|c__Alphaproteobacteria|o__Rhodobacterales|f__Rhodobacteraceae|g__Paracoccus|s__Paracoccus_unclassified	0	0	0	0	0	0	0.01108	0	0	0	0	0	0	0	0	0	0	0	0	0	0	0	0	0	0	0	0	0	0	0	0	0	0	0	0	0	0	0	0	0	0	0	0	0	0	0
k__Bacteria|p__Proteobacteria|c__Betaproteobacteria|o__Burkholderiales|f__Alcaligenaceae|g__Alcaligenes|s__Alcaligenes_unclassified	0	0	0	0	0	0.00027	0.00301	0	0	0	0	0	0	0	0.00129002	0	0	0	0	0	0	0	0	0	0	0	0	0	0	0	0	0	0	0	0	0	0	0	0	0	0	0	0	0	0	0
k__Bacteria|p__Proteobacteria|c__Betaproteobacteria|o__Burkholderiales|f__Burkholderiaceae|g__Burkholderia|s__Burkholderia_unclassified	0	0	0	0	0	0	0	0	0	0	0	0	0	0	0	0	0	0	0	0	0	0	0	0.0212618	0	0	0	0	0	0	0.0187739	0	0	0	0	0	0	0	0	0	0	0	0	0	0	0
k__Bacteria|p__Proteobacteria|c__Betaproteobacteria|o__Burkholderiales|f__Burkholderiaceae|g__Cupriavidus|s__Cupriavidus_unclassified	0	0	0	0	0	0	0	0	0	0	0	0	0	0	0	0	0	0	0	0	0	0	0	0	0	0	0	0	0	0	0	0	0	0	0	0	0	0	0	0	0	0	0	0	0	0.00697026
k__Bacteria|p__Proteobacteria|c__Betaproteobacteria|o__Burkholderiales|f__Burkholderiales_noname|g__Burkholderiales_noname|s__Burkholderiales_bacterium_1_1_47	0.03904	0.48179	0.257	0.0019	0.13042	0.00644	0	0.01631	0	0	0.232797	0	0.00448	0.0287	0.726851	1.29365	0.0178561	0.0848078	0.36079	0.12274	0.0194013	0.19769	0	0	0	0	0.00697015	0	0.00728028	0	0	0	0	0	0.0145224	0.0425641	0.36283	0	0.17699	0	0	0	0	0.00298066	0.0143813	0.026121
k__Bacteria|p__Proteobacteria|c__Betaproteobacteria|o__Burkholderiales|f__Comamonadaceae|g__Comamonas|s__Comamonas_unclassified	0	0	0	0	0	0	0	0	0	0	0	0	0	0	0	0	0	0	0	0	0	0	0	0	0	0	0	0	0	0	0	0	0	0	0	0	0	0	0	0	0	0	0.00492054	0	0	0
k__Bacteria|p__Proteobacteria|c__Betaproteobacteria|o__Burkholderiales|f__Oxalobacteraceae|g__Oxalobacter|s__Oxalobacter_formigenes	0	0	0	0	0	0	0	0	0	0	0	0	0	0	0	0	0	0.119532	0.00379	0	0.00408291	0.03126	0.0267201	0	0	0	0.0337042	0	0	0	0	0	0	0	0.0683114	0	0	0	0	0	0	0	0	0	0	0
k__Bacteria|p__Proteobacteria|c__Betaproteobacteria|o__Burkholderiales|f__Sutterellaceae|g__Parasutterella|s__Parasutterella_excrementihominis	0.06286	1.04192	0.43452	0	0	0.07063	0	0.04589	0	0	0.350496	0.0015	0.00477	0	0.200413	0.27794	0.073535	0.0714888	0.44412	0.189947	0.527969	0.66271	0	0.00197223	0	0	0.00792566	0	0.274301	0	0	0	0	0	0.0158426	0.185368	0.71495	0	0.16007	0	0	0	0	0.00661146	0.00887337	0.0102104
k__Bacteria|p__Proteobacteria|c__Betaproteobacteria|o__Burkholderiales|f__Sutterellaceae|g__Sutterella|s__Sutterella_wadsworthensis	0	0	0	0	0	0	0	2.85295	0	0	0	3.14872	3.25595	1.50724	0	0	0	0	0	0	0	0	0	0	1.15658	0	1.41211	0	0	2.87295	4.61357	0	0	0	0	0	0	2.87773	0	0	0	0	0	0	0	0
k__Bacteria|p__Proteobacteria|c__Betaproteobacteria|o__Neisseriales|f__Neisseriaceae|g__Neisseria|s__Neisseria_unclassified	0	0	0	0	0	0	0	0	0	0	0	0	0	0	0	0	0	0	0	0	0	0	0	0	0.01679	0	0	0	0	0	0	0	0.016121	0	0	0	0	0	0	0	0	0	0	0	0.0344828	0
k__Bacteria|p__Proteobacteria|c__Deltaproteobacteria|o__Desulfovibrionales|f__Desulfovibrionaceae|g__Bilophila|s__Bilophila_unclassified	0	0	0.80177	0.48658	0	0	0.20535	0	0	0.08793	0	0	0.40937	0.22902	0	0.36105	0.00916312	0.361747	0.87255	0.175313	1.74492	0	0.442516	0.500674	0.41799	0.0764649	0.145589	1.23291	0.985208	1.7378	0.0570577	0	0.731072	0.536224	0.196253	0.113491	0.37876	0	0.34121	0	0.0861715	0.104974	0.0143399	0.137951	0.00220318	0.00397015
k__Bacteria|p__Proteobacteria|c__Deltaproteobacteria|o__Desulfovibrionales|f__Desulfovibrionaceae|g__Bilophila|s__Bilophila_wadsworthia	0	0	0.06183	0.08691	0	0	0.04656	0	0	0.01587	0	0	0.02959	0	0	0.01269	0	0	0.04261	0.00740182	0.122979	0	0.0376615	0.0530388	0.00538	0.0132647	0.0260702	0.280458	0.0957537	0.104884	0	0	0	0.0503452	0.0213636	0	0.03472	0	0.00498	0	0.000870016	0.00952307	0	0.00697154	0	0
k__Bacteria|p__Proteobacteria|c__Deltaproteobacteria|o__Desulfovibrionales|f__Desulfovibrionaceae|g__Desulfovibrio|s__Desulfovibrio_desulfuricans	0	0	0	0.00732	0	0	0	0	0	0	0	0	0	0	0	0	0	0	0	0	0.0631797	0	0	0	0	0.0102314	0.00839838	0.0159662	0	0.0100504	0	0.166321	0	0	0	0	0	0	0.01115	0	0	0	0	0	0	0
k__Bacteria|p__Proteobacteria|c__Deltaproteobacteria|o__Desulfovibrionales|f__Desulfovibrionaceae|g__Desulfovibrio|s__Desulfovibrio_piger	0	0	0	0	0	0	0	0	0	0	0	0	0	0	0	0	0	1.28523	0	0	0	0	0.139644	0.0918495	0.21748	0	0.448997	0	0.159336	0	0	0	0.0380813	0	0.531199	0	0	0	0	0.0125166	0	0	0	0	0	0
k__Bacteria|p__Proteobacteria|c__Epsilonproteobacteria|o__Campylobacterales|f__Campylobacteraceae|g__Campylobacter|s__Campylobacter_concisus	0	0	0	0	0	0	0	0	0	0	0	0	0	0	0	0.00053	0	0	0	0	0	0	0	0	0	0	0	0	0	0	0	0	0	0	0	0	0	0	0	0	0	0	0	0	0	0
k__Bacteria|p__Proteobacteria|c__Epsilonproteobacteria|o__Campylobacterales|f__Campylobacteraceae|g__Campylobacter|s__Campylobacter_gracilis	0	0	0	0	0	0	0	0	0.05923	0	0	0	0	0	0	0	0	0	0	0	0	0	0	0	0	0	0	0	0	0	0	0	0	0	0	0	0	0	0	0	0	0	0	0	0	0
k__Bacteria|p__Proteobacteria|c__Epsilonproteobacteria|o__Campylobacterales|f__Campylobacteraceae|g__Campylobacter|s__Campylobacter_hominis	0	0	0	0	0	0	0	0.01113	0	0	0.00331793	0.10461	0	0	0	0	0.00648221	0	0	0	0	0	0	0	0	0	0.00514967	0	0	0	0	0	0	0	0	0	0	0	0	0	0	0	0	0	0	0
k__Bacteria|p__Proteobacteria|c__Epsilonproteobacteria|o__Campylobacterales|f__Helicobacteraceae|g__Helicobacter|s__Helicobacter_pullorum	0	0	0	0	0	0	0	0	0	0	0	0	0	0	0	0	0	0	0	0	0	0	0	0.0286174	0	0	0	0	0	0	0	0	0	0	0	0	0	0	0	0	0	0	0	0	0	0
k__Bacteria|p__Proteobacteria|c__Gammaproteobacteria|o__Aeromonadales|f__Aeromonadaceae|g__Aeromonas|s__Aeromonas_veronii	0	0	0	0	0	0	0	0	0	0	0	0	0	0.03619	0	0	0	0	0	0	0	0	0	0	0	0	0	0	0	0	0	0	0	0	0	0	0	0	0	0	0	0	0	0	0	0
k__Bacteria|p__Proteobacteria|c__Gammaproteobacteria|o__Aeromonadales|f__Succinivibrionaceae|g__Succinatimonas|s__Succinatimonas_hippei	0	0	0	0	0	0	0	0	0	0	0	0	0	0	0	0	0	0	0	0	0	0	0	0	0	0	0	0	0	0	0	0	0.0163119	0	0	0	0	0	0	0	0	0	0	0	0	0
k__Bacteria|p__Proteobacteria|c__Gammaproteobacteria|o__Enterobacteriales|f__Enterobacteriaceae|g__Citrobacter|s__Citrobacter_freundii	0	0	0	0	0	0	0.12855	0	0	0	0	0	0	0.02983	0	0	0	0	0	0	0	0	0.084384	0.0539445	0	0	0	0	0.0308812	0	0	0	0	0	0	0.10688	0	0	0	0	0.0108502	0.0316935	0	0	0	0
k__Bacteria|p__Proteobacteria|c__Gammaproteobacteria|o__Enterobacteriales|f__Enterobacteriaceae|g__Citrobacter|s__Citrobacter_unclassified	0	0	0	0	0	0	0.16607	0	0	0	0	0	0	0.01878	0	0	0	0	0	0	0	0	0.0416439	0.0272892	0	0	0	0	0.0190507	0	0	0	0	0	0	0.041564	0	0	0	0	0.0161103	0.0257554	0	0	0	0
k__Bacteria|p__Proteobacteria|c__Gammaproteobacteria|o__Enterobacteriales|f__Enterobacteriaceae|g__Cronobacter|s__Cronobacter_sakazakii	0	0	0	0	0	0	0	0	0	0	0	0	0	0	0	0	0	0	0	0	0	0	0	0	0	0	0	0	0	0	0	0	0	0	0	0	0	0	0	0	0.0132602	0	0	0	0	0
k__Bacteria|p__Proteobacteria|c__Gammaproteobacteria|o__Enterobacteriales|f__Enterobacteriaceae|g__Enterobacter|s__Enterobacter_aerogenes	0	0	0	0	0	0	0	0	0	0	0	0.00222	0	0	0	0	0	0	0	0	0	0	0	0	0	0	0	0	0	0	0	0	0	0.0263896	0	0	0	0	0	0	0.00947017	0.0213193	0.424944	0	0	0
k__Bacteria|p__Proteobacteria|c__Gammaproteobacteria|o__Enterobacteriales|f__Enterobacteriaceae|g__Enterobacter|s__Enterobacter_cloacae	0	0	0	0	0	0	0.13745	0	0.01024	0	0.01905	0	0	0.0062	0	0.04695	0	0	0	0	0	0.12851	0.00307729	0.134494	0	0	0	0.0642348	0.170137	0	0	0	0	0	0	0.0342133	0.24679	0.00376206	0.00726	0.00650345	2.41143	0.0294304	0.10302	0.00336074	0	0
k__Bacteria|p__Proteobacteria|c__Gammaproteobacteria|o__Enterobacteriales|f__Enterobacteriaceae|g__Escherichia|s__Escherichia_coli	0	1.61627	0.13073	11.9199	16.1334	9.1817	3.21034	0.04862	0	0.01537	0.0322503	0.02652	2.70819	5.83983	14.0965	1.0825	0.79357	0.0378458	0.03836	0.413702	0.31647	0.33942	0.0284397	11.6131	0	0.00508565	0.911903	1.19415	4.06483	0.119425	0.529662	0.740198	0.51157	1.91665	8.09427	14.4163	0.27562	0.462673	0.12519	24.9378	9.08468	0.533973	10.2598	0.837935	4.32604	0.715997
k__Bacteria|p__Proteobacteria|c__Gammaproteobacteria|o__Enterobacteriales|f__Enterobacteriaceae|g__Escherichia|s__Escherichia_fergusonii	0	0	0	0	0	0	0	0	0	0	0	0	0	0	0	0	0	0	0	0	0	0	0	0.00493057	0	0	0	0	0.0332113	0	0	0	0.0145431	0	0	0	0	0	0	0	0	0	0	0	0	0
k__Bacteria|p__Proteobacteria|c__Gammaproteobacteria|o__Enterobacteriales|f__Enterobacteriaceae|g__Escherichia|s__Escherichia_unclassified	0	0	0	1.20474	1.14985	0	0.00619	0.07716	0	0.01521	0.0444705	0.04512	0.03735	2.2481	1.19438	0.74232	0	0.085058	0	0.217744	0.031951	0.10512	0.025272	2.25793	0	0.0109221	0.0309181	0.152359	2.61861	0	0.293042	0.0481631	0.202638	0.127777	2.34989	3.15597	0.11377	0.144419	0.05047	3.19814	4.53885	0.610308	5.41373	0	0	0
k__Bacteria|p__Proteobacteria|c__Gammaproteobacteria|o__Enterobacteriales|f__Enterobacteriaceae|g__Klebsiella|s__Klebsiella_oxytoca	0	0	0	0	0	0	0	0	0	0	0	0	0	0	0	0	0	0	0	0	0	0	0	0	0	0	0	0	0	0	0	0	0	0	0	0	0	0	0	0	0.138182	0	0	0	0	0
k__Bacteria|p__Proteobacteria|c__Gammaproteobacteria|o__Enterobacteriales|f__Enterobacteriaceae|g__Klebsiella|s__Klebsiella_pneumoniae	0	0	0.10455	0	1.21488	0.39944	0	0	0	0	0	0	0	0.02712	0.0131602	0.14406	0	0	0	0.265425	0	0.12494	0	0.259046	0	0	0	0	0.475138	0	0.20135	0	0.330731	0	0	0.093969	1.68535	4.61456	0.05266	1.69429	0.614191	4.05106	3.42491	0	6.49835	0.0700426
k__Bacteria|p__Proteobacteria|c__Gammaproteobacteria|o__Enterobacteriales|f__Enterobacteriaceae|g__Klebsiella|s__Klebsiella_unclassified	0	0	0	0	0.21133	0.12384	0	0	0	0	0	0	0	0.00555	0	0	0	0	0	0.0578242	0	0	0	0	0	0	0	0	0.0651125	0	0.0390198	0	0	0	0	0.0348333	0.60211	0	0	0	0.793784	0	0	0	0	0
k__Bacteria|p__Proteobacteria|c__Gammaproteobacteria|o__Enterobacteriales|f__Enterobacteriaceae|g__Pantoea|s__Pantoea_unclassified	0	0	0	0	0	0	0	0	0	0	0	0	0	0	0	0	0	0	0	0.0158139	0	0	0	0.0151238	0	0	0	0	0.0122205	0	0	0	0	0	0	0.0157115	0	0	0	0.024593	0.0288905	0	0.048382	0	0.0353924	0
k__Bacteria|p__Proteobacteria|c__Gammaproteobacteria|o__Enterobacteriales|f__Enterobacteriaceae|g__Plesiomonas|s__Plesiomonas_shigelloides	0	0	0	0	0	0	0	0	0	0	0	0	0	0	0	0	0	0	0	0	0	0	0	0	0	0	0	0	0.00429016	0	0	0	0	0	0	0	0	0	0	0	0	0	0	0	0	0
k__Bacteria|p__Proteobacteria|c__Gammaproteobacteria|o__Enterobacteriales|f__Enterobacteriaceae|g__Serratia|s__Serratia_marcescens	0	0.00082	0	0	0	0	0.00718	0	0	0	0	0	0	0	0	0.09709	0	0	0	0	0	0	0	0	0	0	0	0	0	0	0	0	0	0	0	0	0	0	0	0	0	0	0	0	0	0
k__Bacteria|p__Proteobacteria|c__Gammaproteobacteria|o__Enterobacteriales|f__Enterobacteriaceae|g__Shigella|s__Shigella_flexneri	0	0	0	0	0	0.0136	0	0	0	0	0	0	0	0	0	0	0	0	0	0	0	0	0	0	0	0	0	0.010414	0	0	0	0	0	0	0	0	0	0	0	0	0	0	0	0	0	0
k__Bacteria|p__Proteobacteria|c__Gammaproteobacteria|o__Enterobacteriales|f__Enterobacteriaceae|g__Shigella|s__Shigella_sonnei	0	0	0	0	0	0	0	0	0	0	0	0	0	0	0	0	0	0	0	0	0	0	0	0	0	0	0	0	0	0	0	0	0	0	0	0	0	0	0	0	0.0111402	0	0	0	0	0
k__Bacteria|p__Proteobacteria|c__Gammaproteobacteria|o__Pasteurellales|f__Pasteurellaceae|g__Actinobacillus|s__Actinobacillus_unclassified	0	0	0	0	0	0	0	0	0	0	0	0	0	0	0	0	0	0	0	0	0	0	0	0	0	0	0	0	0	0	0	0	0	0	0	0	0	0.0133273	0	0	0	0	0	0	0.245342	0
k__Bacteria|p__Proteobacteria|c__Gammaproteobacteria|o__Pasteurellales|f__Pasteurellaceae|g__Aggregatibacter|s__Aggregatibacter_aphrophilus	0	0	0	0	0	0	0	0	0	0	0	0	0	0.01564	0	0	0	0	0	0	0	0	0	0	0	0	0	0	0	0	0	0	0	0	0	0	0	0	0	0	0	0	0	0	0.00432552	0
k__Bacteria|p__Proteobacteria|c__Gammaproteobacteria|o__Pasteurellales|f__Pasteurellaceae|g__Aggregatibacter|s__Aggregatibacter_segnis	0	0	0	0	0	0	0	0	0	0	0	0.00384	0.00179	0	0	0	0	0	0	0	0	0	0	0	0	0	0	0	0	0	0	0	0	0	0	0	0	0	0	0	0	0	0	0	0.163541	0
k__Bacteria|p__Proteobacteria|c__Gammaproteobacteria|o__Pasteurellales|f__Pasteurellaceae|g__Aggregatibacter|s__Aggregatibacter_unclassified	0	0	0	0	0	0	0	0	0	0	0	0.00155	0	0	0	0	0	0	0	0	0	0	0	0	0	0	0	0	0	0	0	0	0	0	0	0	0	0	0	0	0	0	0	0	0	0
k__Bacteria|p__Proteobacteria|c__Gammaproteobacteria|o__Pasteurellales|f__Pasteurellaceae|g__Haemophilus|s__Haemophilus_haemolyticus	0	0	0	0	0	0	0	0	0	0	0	0	0	0	0	0.00152	0	0	0	0	0	0	0	0	0	0	0	0	0	0	0	0	0	0	0	0	0	0.00115063	0	0	0	0	0	0	0	0
k__Bacteria|p__Proteobacteria|c__Gammaproteobacteria|o__Pasteurellales|f__Pasteurellaceae|g__Haemophilus|s__Haemophilus_parainfluenzae	0.00284	0	0	0	0.08408	0	0	0	0	0	0	0.46247	0.73708	0.00104	0	1.52774	0.189314	0	0	0.0272667	0.00161511	0	0	0.556269	0.09822	0	0	0	0.00721028	0	0	0	0.198306	0	0.232089	0.0769074	0.06189	2.5014	0.50095	0.00231123	0.190023	0.649892	0.00967037	0.0918503	6.89117	0.164106
k__Bacteria|p__Proteobacteria|c__Gammaproteobacteria|o__Pasteurellales|f__Pasteurellaceae|g__Haemophilus|s__Haemophilus_paraphrohaemolyticus	0	0	0	0	0	0	0	0	0	0	0	0	0	0	0	0	0	0	0	0	0	0	0	0	0	0	0	0	0	0	0	0	0	0	0	0	0	0	0	0	0	0	0	0	0.946793	0
k__Bacteria|p__Proteobacteria|c__Gammaproteobacteria|o__Pasteurellales|f__Pasteurellaceae|g__Haemophilus|s__Haemophilus_sputorum	0	0	0	0	0	0	0	0	0	0	0	0	0	0	0	0.01281	0	0	0	0	0	0	0	0	0	0	0	0	0	0	0	0	0	0	0	0	0	0	0	0	0	0	0	0	0.0164834	0
k__Bacteria|p__Proteobacteria|c__Gammaproteobacteria|o__Pseudomonadales|f__Moraxellaceae|g__Acinetobacter|s__Acinetobacter_junii	0	0	0	0	0	0	0	0	0	0	0	0	0	0	0	0	0	0	0	0	0	0	0	0	0	0	0	0	0	0	0	0	0	0	0	0	0	0	0	0	0	0	0	0	0	0.0467918
k__Bacteria|p__Proteobacteria|c__Gammaproteobacteria|o__Pseudomonadales|f__Moraxellaceae|g__Acinetobacter|s__Acinetobacter_parvus	0	0	0	0	0	0	0	0	0	0	0	0	0	0	0	0	0	0	0	0	0	0	0	0	0	0	0	0	0	0	0	0	0	0	0	0	0	0	0	0	0	0	0	0	0	0.0338013
k__Bacteria|p__Proteobacteria|c__Gammaproteobacteria|o__Pseudomonadales|f__Moraxellaceae|g__Acinetobacter|s__Acinetobacter_unclassified	0	0	0	0	0	0	0	0	0	0	0	0	0	0	0	0	0	0	0	0	0	0	0	0	0	0	0	0	0	0	0	0	0	0	0	0	0	0	0	0	0	0	0	0	0	0.078473
k__Bacteria|p__Proteobacteria|c__Gammaproteobacteria|o__Pseudomonadales|f__Moraxellaceae|g__Enhydrobacter|s__Enhydrobacter_aerosaccus	0	0	0	0	0	0	0	0	0	0	0	0	0	0	0	0	0	0	0	0	0	0	0	0	0	0	0	0	0	0	0	0	0	0	0	0	0	0	0	0	0	0	0	0	0	0.199047
k__Bacteria|p__Synergistetes|c__Synergistia|o__Synergistales|f__Synergistaceae|g__Pyramidobacter|s__Pyramidobacter_piscolens	0	0	0	0	0	0	0	0	0	0	0	0	0	0	0	0	0	0	0	0	0.0660388	0	0	0	0	0	0	0	0	0	0	0	0	0	0	0	0.05131	0	0	0	0	0	0	0	0	0
k__Bacteria|p__Synergistetes|c__Synergistia|o__Synergistales|f__Synergistaceae|g__Pyramidobacter|s__Pyramidobacter_piscolens	0	0	0	0	0	0	0	0	0	0	0	0	0	0	0	0.02825	0	0	0	0	0	0	0	0	0	0	0	0	0	0	0	0	0	0	0	0	0	0	0	0	0	0	0	0	0	0
k__Bacteria|p__Tenericutes|c__Mollicutes|o__Mycoplasmatales|f__Mycoplasmataceae|g__Mycoplasma|s__Mycoplasma_hominis	0	0	0	0	0	0	0	0	0	0	0	0	0	0.00562	0	0	0	0	0	0	0	0	0	0	0	0	0	0	0	0	0	0	0	0	0	0	0	0	0	0	0	0	0	0	0	0
k__Bacteria|p__Verrucomicrobia|c__Verrucomicrobiae|o__Verrucomicrobiales|f__Verrucomicrobiaceae|g__Akkermansia|s__Akkermansia_muciniphila	0	0	0	0.09334	0	0	0	0	0	0	0	0	0	0	0	0	0	1.10775	0.01611	0	8.81655	0	0	0.107013	0	0.00920021	2.47767	0.613907	0	0	0	0	0	0	0.151605	0	0	0	0.44196	0	0	0	0	0	0	0

## Sheet: Table S8
Table S8 SNP information for species with sufficient supporting reads and presented in at leat 20% samples of each group
Speceis	Reference genome (Accession No.)	Genome size (bp)	Sample	Covered bases (bp)	Covered fraction (%)	Mean coverage (depth)	No. SNP	SNP density (per kb)
Bacteroides coprocola	NZ_ABIY02000000	4300117	H01	3115700	0.724562	116.676	24805	7.96129
			H04	3068931	0.713685	25.2888	32281	10.5186
			H08	3255605	0.757097	225.636	18462	5.67084
			H10	3006420	0.699148	53.1969	12661	4.21132
			H12	3249331	0.755638	35.1672	8323	2.56145
			H14	3137631	0.729662	66.1281	9802	3.12401
			H16	3083793	0.717142	44.8448	29040	9.41697
			H21	3136191	0.729327	23.2455	11941	3.80748
			H26	3062719	0.712241	26.7132	10434	3.40678
			H28	3394875	0.789484	64.696	9575	2.82043
			P02	3386407	0.787515	24.5531	9664	2.85376
			P13	3011044	0.700224	85.9348	16040	5.32706
			P15	3044789	0.708071	18.1033	17451	5.73143
			P27	2993633	0.696175	149.02	17472	5.83639
			P32	3003009	0.698355	83.5831	9490	3.16016
			P41	3373749	0.784571	76.8996	16610	4.92331
			P42	2995278	0.696557	85.4929	21215	7.08282
Bacteroides stercoris	NZ_ABFZ02000000	4009829	H01	2768341	0.690389	94.8101	62654	22.6323
			H04	2979781	0.743119	51.9633	25227	8.46606
			H13	3128955	0.780321	35.5964	19684	6.29092
			H15	3088979	0.770352	40.0513	18889	6.11497
			H17	2829855	0.70573	19.5491	62554	22.105
			H24	3080518	0.768242	22.4368	18523	6.01295
			H25	3183413	0.793902	109.837	20625	6.4789
			H28	2986010	0.744673	32.0457	21775	7.29234
			H30	3080020	0.768118	37.3561	18480	5.99996
			H31	2989330	0.745501	153.957	20080	6.71722
			P02	3007676	0.750076	17.1096	20061	6.66993
			P25	3042753	0.758824	173.121	19375	6.36759
			P27	2941869	0.733664	16.1981	21528	7.3178
			P33	3022325	0.753729	143.756	19429	6.42849
			P36	2958585	0.737833	18.0124	18813	6.35878
			P37	3056292	0.7622	28.9137	26441	8.65133
			P40	3007783	0.750103	200.468	21739	7.22758
			P41	2949674	0.735611	33.4425	20811	7.05536
			P42	3174075	0.791574	182.615	25577	8.0581
			P45	3007980	0.750152	127.777	19550	6.49938
			P46	3084167	0.769152	20.076	18898	6.12742
Bacteroides uniformis	NZ_AAYH02000000	4719097	H01	3843765	0.814513	19.119	5069	1.31876
			H02	3207949	0.67978	34.4897	4669	1.45545
			H05	4035148	0.855068	17.0048	3388	0.839622
			H06	3205326	0.679224	34.5729	4061	1.26695
			H08	3975075	0.842338	50.0585	5997	1.50865
			H11	3723174	0.788959	38.638	4093	1.09933
			H15	3864518	0.81891	38.8567	5555	1.43744
			H17	2894250	0.613306	18.0408	51331	17.7355
			H22	3825275	0.810595	51.2345	3867	1.01091
			H25	3648923	0.773225	46.1849	8384	2.29766
			H26	3134458	0.664207	19.6603	4145	1.3224
			H27	3194625	0.676957	36.4341	5113	1.6005
			H31	3670394	0.777775	20.3282	3175	0.86503
			H32	3607905	0.764533	23.4842	2920	0.809334
			P03	3563871	0.755202	422.887	3915	1.09852
			P20	3597015	0.762225	23.821	2972	0.826241
			P21	2886716	0.611709	34.1124	21041	7.28891
			P27	3354921	0.710924	39.2221	3887	1.1586
			P30	3547675	0.75177	49.6345	2829	0.797424
			P35	3382392	0.716746	62.237	4279	1.26508
			P40	3228080	0.684046	18.4158	4000	1.23913
			P41	3451487	0.731387	23.3371	4404	1.27597
			P42	3182684	0.674426	20.1092	5571	1.75041
			P46	3871114	0.820308	25.549	3340	0.862801
Bacteroides vulgatus	NC_009614	5163189	H01	4330552	0.838736	133.944	28097	6.48809
			H02	4307692	0.834308	59.6337	6610	1.53446
			H03	3775003	0.731138	41.9773	48131	12.7499
			H04	4184382	0.810426	48.8438	5962	1.42482
			H05	4116695	0.797316	19.789	33076	8.0346
			H06	4148984	0.80357	277.468	6770	1.63172
			H07	4229622	0.819188	28.6511	9206	2.17655
			H08	4183450	0.810245	96.8214	8426	2.01413
			H09	3987033	0.772204	17.7331	19122	4.79605
			H10	4038653	0.782201	15.4966	11562	2.86284
			H11	4247542	0.822659	142.018	7709	1.81493
			H12	4424185	0.856871	29.5154	8231	1.86046
			H13	4050108	0.78442	56.0692	15576	3.84582
			H14	4111245	0.796261	17.2785	11891	2.89231
			H15	4349952	0.842493	43.3008	13858	3.18578
			H16	3952439	0.765503	38.9765	8120	2.05443
			H17	4297470	0.832329	113.577	8363	1.94603
			H21	4221219	0.81756	29.4062	9027	2.13848
			H22	4222758	0.817858	68.2059	6584	1.55917
			H24	4319957	0.836684	85.6774	21004	4.86209
			H25	4360053	0.84445	224.257	8486	1.94631
			H27	4071955	0.788651	218.79	42189	10.3609
			H28	4359676	0.844377	36.1793	20574	4.71916
			H30	4313926	0.835516	140.62	40762	9.44893
			H31	4169404	0.807525	331.078	12946	3.105
			H32	3248660	0.629196	124.206	51312	15.7948
			P02	4362344	0.844893	21.4191	9823	2.25177
			P13	4126617	0.799238	42.6649	8151	1.97523
			P14	4178534	0.809293	54.9092	7985	1.91096
			P21	3302705	0.639664	209.157	49650	15.0331
			P22	4273150	0.827618	116.604	30931	7.23845
			P25	3952557	0.765526	324.556	8383	2.12091
			P27	4048695	0.784146	76.8408	6683	1.65066
			P29	4055556	0.785475	117.633	21814	5.37879
			P30	4190857	0.81168	252.415	8474	2.02202
			P32	4101448	0.794363	79.3734	7657	1.8669
			P33	4267944	0.82661	83.5207	8252	1.93348
			P34	4019370	0.778467	132.108	7425	1.8473
			P35	4158622	0.805437	117.642	8367	2.01196
			P36	4218835	0.817099	23.0155	35420	8.39568
			P37	4351404	0.842774	76.7502	6020	1.38346
			P38	4166755	0.807012	56.8876	7967	1.91204
			P39	4263654	0.825779	32.3667	29168	6.84108
			P40	3777815	0.731682	53.3553	17784	4.70748
			P41	4301654	0.833139	34.9253	26419	6.14159
			P42	4190067	0.811527	36.0476	6317	1.50761
			P43	3330020	0.644954	144.5	50969	15.3059
			P44	3495326	0.67697	32.7629	50597	14.4756
			P45	3284674	0.636172	65.0802	49687	15.1269
			P46	4364631	0.845336	91.1805	8390	1.92227
			P47	3517503	0.681266	100.93	57290	16.2871
Phascolarctobacterium sp	CBDS010000000	2369100	H02	2115385	0.892907	18.3154	9150	4.32545
			H06	2132836	0.900273	34.3956	9430	4.42134
			H07	2198011	0.927783	19.804	9016	4.10189
			H15	2158293	0.911018	20.0485	11276	5.2245
			H17	2134020	0.900772	17.783	12421	5.82047
			H31	2096241	0.884826	25.1348	8775	4.18606
			H32	2159535	0.911542	20.8395	9016	4.17497
			P13	2264496	0.955847	15.9431	6378	2.81652
			P15	2160231	0.911836	18.4073	9057	4.19261
			P27	2124607	0.896799	22.3779	9164	4.31327
			P30	2112221	0.891571	23.984	9036	4.27796
			P33	2094420	0.884057	16.646	8987	4.29093
			P35	2051382	0.865891	18.53	8903	4.34
			P37	2173399	0.917394	25.5412	8897	4.09359
			P38	2243864	0.947138	29.7153	4050	1.80492
			P39	2085031	0.880094	18.2535	9307	4.46372
			P41	2084388	0.879823	19.1991	9469	4.54282
			P43	2032486	0.857915	22.9572	8387	4.12647
			P45	2037448	0.860009	18.0034	29102	14.2836
Prevotella copri	NZ_ACBX02000000	3512473	H07	2230151	0.634923	325.432	138871	62.2698
			H09	2549410	0.725816	460.437	40102	15.7299
			H10	2447684	0.696855	540.457	41678	17.0275
			H11	2363456	0.672875	194.576	55278	23.3886
			H16	2370321	0.67483	793.246	41925	17.6875
			H18	2465661	0.701973	398.15	36980	14.998
			H19	2362302	0.672547	517.625	39062	16.5356
			H23	2600075	0.740241	455.994	38993	14.9969
			P05	2711611	0.771995	312.302	45122	16.6403
			P13	2356674	0.670944	313.79	36984	15.6933
			P14	2344160	0.667382	660.546	37203	15.8705
			P15	2354089	0.670208	360.132	35971	15.2802
			P31	2491944	0.709456	396.998	40476	16.2427
			P37	2354795	0.670409	244.764	37976	16.1271
			P38	2464157	0.701545	301.478	45301	18.384
			P39	2357687	0.671233	373.231	40245	17.0697

## Sheet: Table S9
Table S9 Detailed information of the Bacteroides vulgatus SNPs across groups .Only SNPs with significantly differed distribution are shown (P<0.01).
Ref. Genome（CP000139）		Ref. Genome CDS				SNP in Control																										SNP in Patient
Base	Position	Start	End	RAST Annotation		H1	H11	H10	H32	H3	H4	H12	H2	H6	H25	H8	H28	H5	H30	H24	H9	H14	H13	H16	H7	H22	H27	H17	H15	H31	H21	P33	P35	P39	P47	P34	P40	P32	P41	P13	P29	P25	P44	P2	P37	P46	P36	P27	P14
A	84384	83232	84698	-	outer membrane protein TolC, putative	A	A	G	G	G	A	A	A	G	A	G	G	A	A	A	A	G	G	A	G	G	G	A	G	A	A	G	G	G	G	G	G	G	A	G	A	G	G	G	G	A	G	G	G
T	106717	106393	106935	-	FIG00937849: hypothetical protein	C	T	T	T	T	C	T	T	T	T	T	C	T	C	C	T	T	T	T	C	T	T	T	C	T	T	T	T	T	T	T	T	T	T	T	T	T	T	T	T	T	T	T	T
G	139867	139529	140296	-	Acyl-[acyl-carrier-protein]--UDP-N-acetylglucosamine O-acyltransferase (EC 2.3.1.129)	G	G	G	G	G	G	G	A	A	G	G	G	G	G	G	A	G	G	G	G	G	G	A	G	G	G	G	A	G	G	A	A	A	A	A	G	G	G	G	A	A	G	A	G
T	286366	285548	288415	Carbohydrates	Beta-galactosidase (EC 3.2.1.23)	C	C	C	T	T	C	C	C	T	T	T	C	T	T	C	C	T	T	T	C	C	T	C	T	C	C	T	T	T	T	T	T	C	C	T	T	T	T	T	T	T	T	T	T
A	549217	548732	549487	Protein Metabolism	Peptidyl-prolyl cis-trans isomerase (EC 5.2.1.8)	A	A	A	G	G	A	A	A	G	G	G	G	A	A	A	A	A	A	A	A	A	A	A	A	G	A	A	G	A	G	G	A	G	A	A	A	G	G	G	G	G	G	G	G
A	610901	610226	611584	Protein Metabolism	Survival protein SurA precursor (Peptidyl-prolyl cis-trans isomerase SurA) (EC 5.2.1.8)	G	G	G	A	A	A	G	G	A	G	G	G	A	G	G	G	G	A	G	A	G	A	G	G	G	G	A	G	G	A	A	A	G	G	G	A	A	A	A	A	A	A	A	A
T	695067	693423	695921	Carbohydrates	Alpha-N-arabinofuranosidase (EC 3.2.1.55)	C	T	T	C	C	C	T	T	C	T	T	C	C	T	T	T	T	C	T	C	T	T	T	C	C	T	C	C	C	C	C	C	C	C	C	T	C	C	T	C	T	C	C	C
G	716720	716531	716824	-	hypothetical protein	A	A	A	A	A	A	A	A	G	A	G	A	G	A	A	A	A	A	A	A	A	A	A	A	A	G	A	G	A	A	G	A	A	A	G	A	G	A	G	G	G	A	G	G
G	751138	751055	751183	-	hypothetical protein	A	G	A	G	G	G	A	G	G	G	G	G	G	G	G	A	G	G	A	G	A	G	A	G	G	G	G	G	G	G	G	G	G	G	G	G	G	G	G	G	G	G	G	G
T	786861	785809	788001	Carbohydrates	Alpha-1,2-mannosidase	T	T	T	C	C	T	T	C	C	C	C	T	C	C	C	T	T	T	T	C	T	C	T	T	T	T	T	C	T	C	C	T	C	C	C	C	C	C	C	C	C	C	C	C
C	801153	800580	803990	Membrane Transport	TonB family protein/TonB-dependent receptor	C	C	T	C	C	C	T	C	C	T	T	T	C	C	T	C	C	C	C	T	T	C	T	T	T	C	C	C	C	C	C	C	C	C	C	C	T	C	C	C	C	C	C	T
T	818734	815786	818941	Membrane Transport	TonB family protein / TonB-dependent receptor	C	T	C	T	T	T	C	C	T	C	T	T	T	T	T	T	T	T	T	C	C	T	C	T	T	T	T	T	T	T	T	T	T	T	T	T	T	T	T	T	T	T	T	T
T	818764					C	T	C	T	T	T	C	C	T	C	T	T	T	T	T	T	T	T	T	C	C	T	C	C	T	T	T	T	T	T	T	T	T	T	T	T	T	T	T	T	T	T	T	T
T	847623	846426	847634	Amino Acids and Derivatives	Argininosuccinate synthase (EC 6.3.4.5)	T	C	T	C	C	T	T	C	C	C	C	T	T	C	T	T	C	C	C	T	T	C	T	C	T	C	C	C	T	C	C	C	C	C	C	C	C	C	C	C	C	C	C	C
C	850378	849098	850576	Carbohydrates	Rhamnulokinase (EC 2.7.1.5)	C	T	C	T	T	C	C	T	T	T	T	T	T	T	T	C	T	T	T	T	C	T	C	T	T	T	T	T	T	T	T	T	T	T	T	T	T	T	T	T	T	T	T	T
G	850399					G	A	G	A	A	G	G	A	A	G	G	G	A	A	G	G	G	A	G	A	G	A	G	A	G	G	G	A	A	A	A	A	A	A	G	A	G	A	A	A	A	A	A	G
G	917833	917614	918384	-	Transcriptional regulator	A	G	A	G	G	A	A	G	G	A	G	G	G	G	A	G	G	G	G	G	G	G	A	G	G	G	G	G	G	G	G	G	G	G	G	G	G	G	G	G	G	G	G	G
A	1066915	1066781	1067536	Amino Acids and Derivatives	Creatinine amidohydrolase (EC 3.5.2.10)	A	A	G	G	G	A	A	G	G	A	G	G	A	G	G	A	G	G	G	G	A	G	G	A	G	G	G	G	G	G	G	G	G	G	G	G	G	G	G	G	G	G	G	G
A	1128293	-	-		intergenic	A	A	A	A	G	A	A	T	A	A	A	A	A	A	A	A	A	A	A	A	A	A	T	A	A	A	A	A	G	G	A	A	A	G	A	A	A	G	A	A	A	G	A	A
C	1170913	1169885	1171498	-	Outer membrane protein assembly factor YaeT precursor	C	C	T	T	T	C	T	T	T	T	T	T	T	T	T	C	T	T	T	C	C	C	T	T	T	T	T	T	T	T	T	T	T	T	T	T	T	T	T	T	T	T	T	T
G	1200040	1199363	1201855	-	membrane protein, putative	G	G	G	G	G	A	G	G	A	G	G	G	G	G	G	G	G	G	G	G	G	G	G	G	G	G	A	A	G	G	A	G	G	G	G	A	G	G	G	A	A	G	A	A
C	1358981	1358779	1359414	Cell Wall and Capsule	Outer membrane lipoprotein carrier protein LolA	C	C	C	A	A	A	C	A	A	A	C	C	A	C	C	C	A	A	A	A	C	C	C	A	C	A	C	A	A	A	A	A	A	A	A	A	A	A	A	C	A	C	A	A
A	1359024					A	A	C	A	A	A	C	A	A	A	C	A	C	C	A	A	A	A	A	A	C	A	C	A	A	A	A	A	A	A	A	A	A	A	A	A	A	A	A	A	A	A	A	A
G	1361382	1360779	1361963	-	FIG00404025: hypothetical protein	G	A	G	G	G	A	G	G	A	G	A	A	A	A	A	G	G	G	G	G	G	A	A	A	A	G	G	G	G	G	G	G	G	G	G	G	G	G	G	G	G	G	G	G
G	1381457	1381244	1382141	-	DNA-binding response regulator, AraC family	A	G	G	G	G	G	G	G	G	G	G	G	G	G	G	G	G	G	G	G	G	G	G	G	G	G	A	G	A	G	A	G	G	G	G	A	G	G	G	G	A	G	A	A
T	1383121	1382154	1385318	-	DNA-binding response regulator, AraC family	C	T	T	T	T	T	T	T	T	T	T	T	C	T	T	T	T	T	T	T	T	T	T	T	T	T	C	C	C	T	C	T	C	T	T	C	T	T	T	T	C	T	C	T
G	1398821	1398521	1399786	-	3-oxoacyl-[acyl-carrier-protein] synthase, KASII (EC 2.3.1.179)	G	G	G	G	G	G	G	G	A	A	A	G	G	G	G	G	G	G	G	G	G	G	G	G	G	G	G	G	A	G	A	G	G	A	G	A	A	G	A	A	A	G	A	A
A	1448508	1447938	1448984	Cell Wall and Capsule	NAD-dependent epimerase/dehydratase family protein	A	A	C	C	C	A	A	C	C	A	C	A	A	A	A	A	C	A	C	A	C	C	A	A	C	C	C	C	C	C	C	A	C	C	C	C	C	C	C	C	C	C	C	C
C	1608187	1605859	1609113	-	putative Tricorn-like protease	T	T	C	C	C	C	T	T	C	C	C	C	C	T	T	C	C	C	C	T	C	C	T	C	C	T	C	C	C	C	C	C	C	C	C	C	C	C	C	C	C	C	C	C
C	1723877	1723464	1725137	-	hypothetical protein	C	C	C	C	C	C	C	C	C	C	C	C	C	C	C	C	C	C	C	C	C	C	C	C	C	C	C	C	C	C	T	C	C	C	C	T	C	C	C	C	T	T	T	C
T	1754873	1754427	1755725	Carbohydrates	Rhamnogalacturonides degradation protein RhiN	T	T	C	C	T	C	T	T	T	T	C	T	C	T	C	T	T	T	C	T	T	T	T	C	C	T	C	C	C	C	T	T	C	T	C	C	C	C	C	C	C	T	T	C
T	1819897	1819270	1822446	Carbohydrates	Beta-galactosidase (EC 3.2.1.23)	C	T	T	T	T	C	T	T	T	T	T	T	T	C	C	C	C	C	C	C	T	C	C	C	C	C	T	T	T	T	T	C	T	C	T	T	T	T	T	C	T	T	T	T
T	2422537	2421821	2423728	-	Glutaryl-7-ACA acylase	T	C	C	C	C	T	T	C	C	C	C	T	C	C	T	T	T	C	C	T	C	C	C	T	C	C	C	C	C	C	C	C	C	C	C	C	C	C	C	C	C	C	C	C
C	2484571	2482411	2485026	Protein Metabolism	Alanyl-tRNA synthetase (EC 6.1.1.7)	C	C	C	C	C	C	C	C	C	C	C	C	C	C	C	C	C	C	C	C	C	C	C	C	C	C	C	T	C	C	T	C	T	T	C	T	C	C	T	C	C	C	T	C
C	3142854	3141893	3143056	-	Protein-tyrosine-phosphatase (EC 3.1.3.48)	C	C	C	C	C	C	C	C	C	C	C	C	C	C	C	C	C	C	C	C	C	C	C	C	C	C	C	C	C	C	T	C	C	C	C	T	C	C	C	C	C	T	T	C
A	3150769	3149818	3152328	DNA Metabolism	Recombination inhibitory protein MutS2	T	T	A	T	T	A	A	A	T	T	T	A	A	A	A	T	T	T	T	T	A	T	A	T	A	T	T	T	T	T	T	T	T	T	T	T	T	T	T	T	T	T	T	T
T	3198961	3098809	3199816	Carbohydrates	D-lactate dehydrogenase (EC 1.1.1.28)	C	T	T	C	C	T	T	T	T	C	T	T	T	C	C	T	C	T	T	C	T	C	C	T	C	T	C	C	C	C	C	T	C	C	T	C	C	C	C	T	T	C	C	C
C	3855599	3854148	3856976	DNA Metabolism	Excinuclease ABC subunit A	C	C	C	C	C	C	C	C	C	C	C	C	C	C	C	C	C	C	C	C	C	C	C	C	C	C	C	T	C	C	C	C	T	T	C	C	C	C	T	C	C	C	C	T
A	3940473	3939718	3941211	Cofactors, Vitamins, Prosthetic Groups, Pigments	Cobyric acid synthase (EC 6.3.5.10)	A	C	A	A	A	A	A	A	A	A	A	A	A	A	A	A	C	A	A	A	A	A	A	A	A	A	A	C	A	A	C	A	C	A	A	C	A	A	A	A	C	C	C	C
C	3940485					C	T	C	C	C	C	C	C	C	C	C	C	C	C	C	C	T	C	C	C	C	C	C	C	C	C	C	T	C	C	T	C	T	C	C	T	C	C	T	C	T	C	T	T
G	4386801	4386033	4387565	-	Aliphatic amidase AmiE (EC 3.5.1.4)	G	G	A	G	G	G	A	G	G	G	G	G	A	G	G	A	G	G	G	A	A	G	A	G	G	G	G	G	G	G	G	G	G	G	G	G	G	G	G	G	G	G	G	G
C	4699905	4699212	4700132	-	putative permease	C	C	T	C	C	C	C	C	C	C	C	C	C	T	T	T	T	C	C	T	T	C	C	C	T	C	C	C	C	C	C	C	C	C	C	C	C	C	C	C	C	C	C	C
G	4713920	4713711	4716299	Protein Metabolism	ClpB protein	A	A	A	G	G	G	A	A	G	A	A	G	G	G	A	A	A	G	G	G	A	G	A	A	G	A	G	G	G	G	G	G	G	G	G	G	A	G	G	G	G	G	G	A
G	4719554	4719536	4719850	-	Preprotein translocase subunit YajC (TC 3.A.5.1.1)	G	A	G	G	G	A	G	A	G	G	G	G	G	A	G	A	G	G	G	A	G	G	A	A	G	G	G	G	G	G	G	G	G	G	G	G	G	G	G	G	G	G	G	G
T	4820453	4819887	4820876	Amino Acids and Derivatives	D-3-phosphoglycerate dehydrogenase (EC 1.1.1.95)	C	C	T	T	T	C	T	C	T	C	T	C	C	C	T	C	C	T	T	C	C	T	C	T	T	C	T	T	C	T	T	T	T	T	C	T	T	T	C	T	T	T	T	T
A	5017666	5015257	5018304	-	AcrB/D/F family transporter	G	G	G	A	A	A	G	G	A	G	A	A	A	A	G	G	G	A	G	G	G	G	G	G	A	G	G	G	A	A	A	A	G	A	G	A	A	A	A	A	A	A	A	A
[truncated: 8 more columns]
